# Supplementary material for: Excavation of Genes Responsive to Brassinosteroids by Transcriptome Sequencing in Adiantum flabellulatum Gametophytes
Source: MDPI journal article supplement (doi:10.3390/genes13061061), 2022-06-14
Supplement: s1 [file s1]

## Supplementary Figures

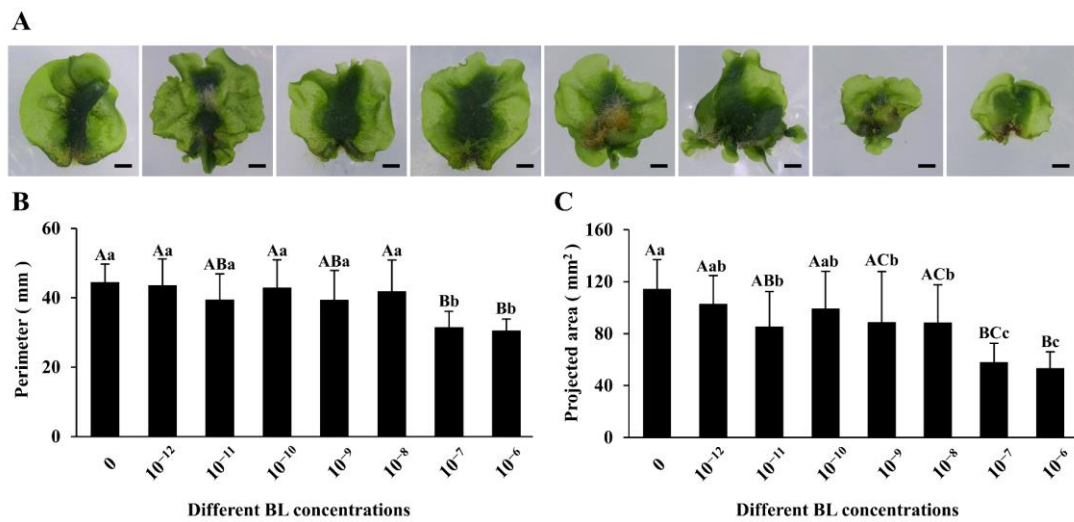

**Supplementary Figure S1.** *A. flabellulatum* gametophyte growth response to different BL concentrations. **A–C:** *A. flabellulatum* gametophytes cultured for 60 d in 0 M,  $10^{-12}$  M,  $10^{-11}$  M,  $10^{-10}$  M,  $10^{-9}$  M,  $10^{-8}$  M,  $10^{-7}$  M and  $10^{-6}$  M BL respectively (**A**), as well as their perimeters (**B**) and projected areas (**C**). Different lowercase letters or capital letters in different groups indicated statistically significant differences ( $p < 0.05$ ) or statistically extremely significant differences ( $p < 0.01$ ).

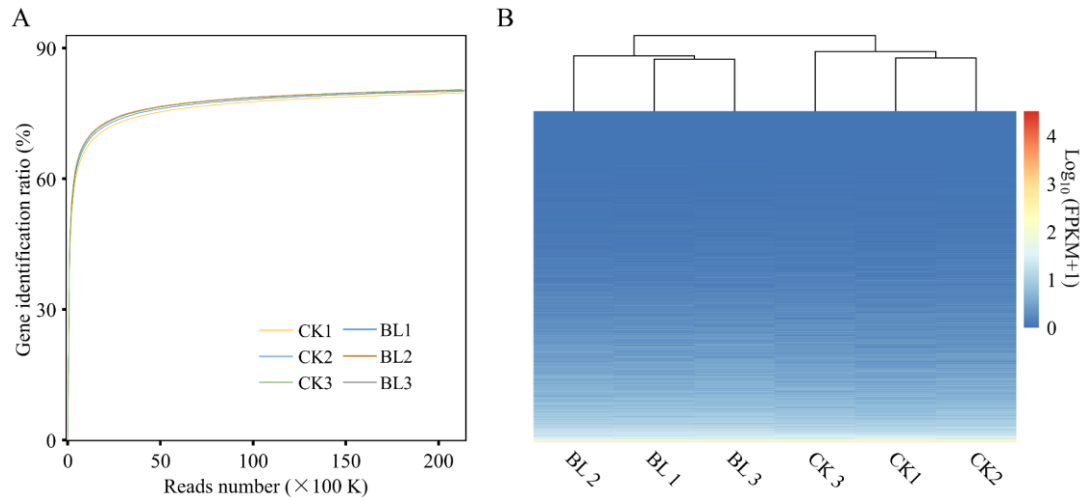

**Supplementary Figure S2.** Sequencing saturation analysis and cluster analysis of 6 samples. **A:** Sequencing saturation curves of 6 samples; **B:** Cluster analysis among 6 samples of 2 treatments based on the gene expression data. The result showed that 3 biological replicates of each treatment were clustered into one branch.

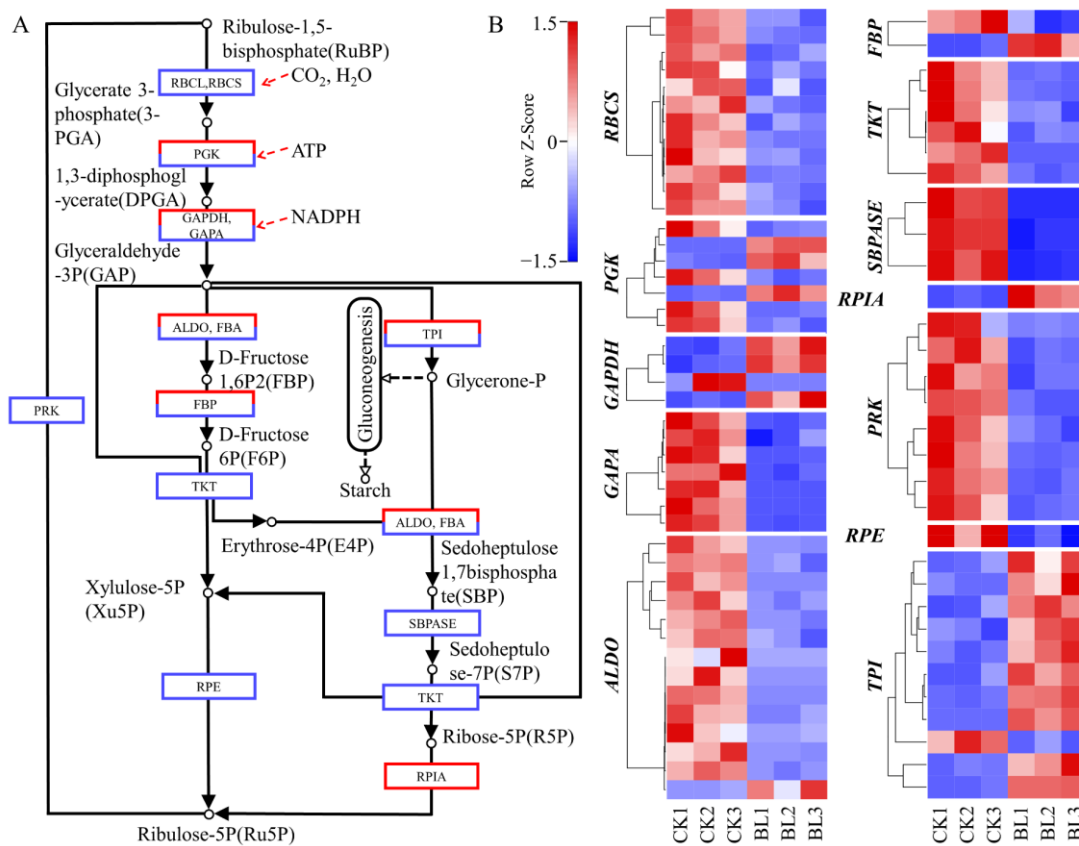

**Supplementary Figure S3.** Most of the DEGs in Calvin cycle were down-regulated in BL treatment. **A:** Calvin cycle (<https://www.kegg.jp/entry/map00710> (accessed on 24 April 2022)), the red and blue square frames indicated all DEGs in the step were up-regulated and down-regulated in BL treatment, respectively (the same below); **B:** Expression heat maps of the DEGs in Calvin cycle in the 6 samples.

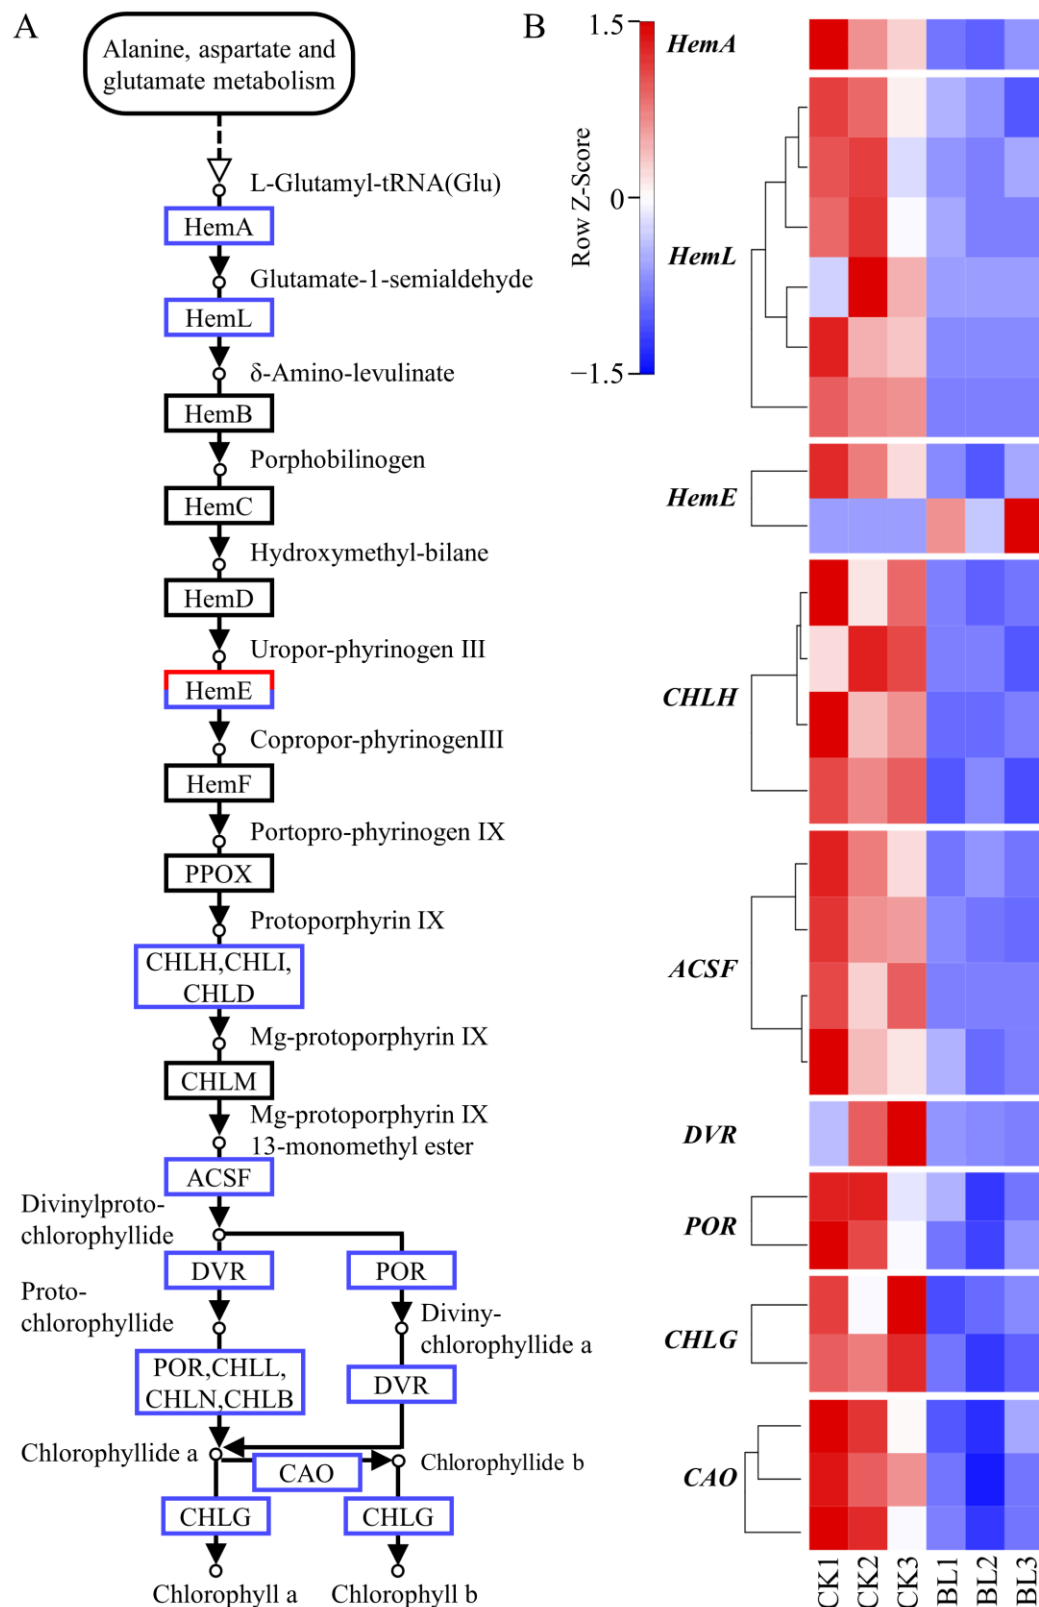

**Supplementary Figure S4.** Almost all of the DEGs in chlorophyll biosynthesis were down-regulated in BL treatment. **A:** Chlorophyll biosynthesis pathway (<https://www.kegg.jp/entry/map00860> (accessed on 24 April 2022)); **B:** Expression heat maps of the DEGs in chlorophyll biosynthesis in the 6 samples.

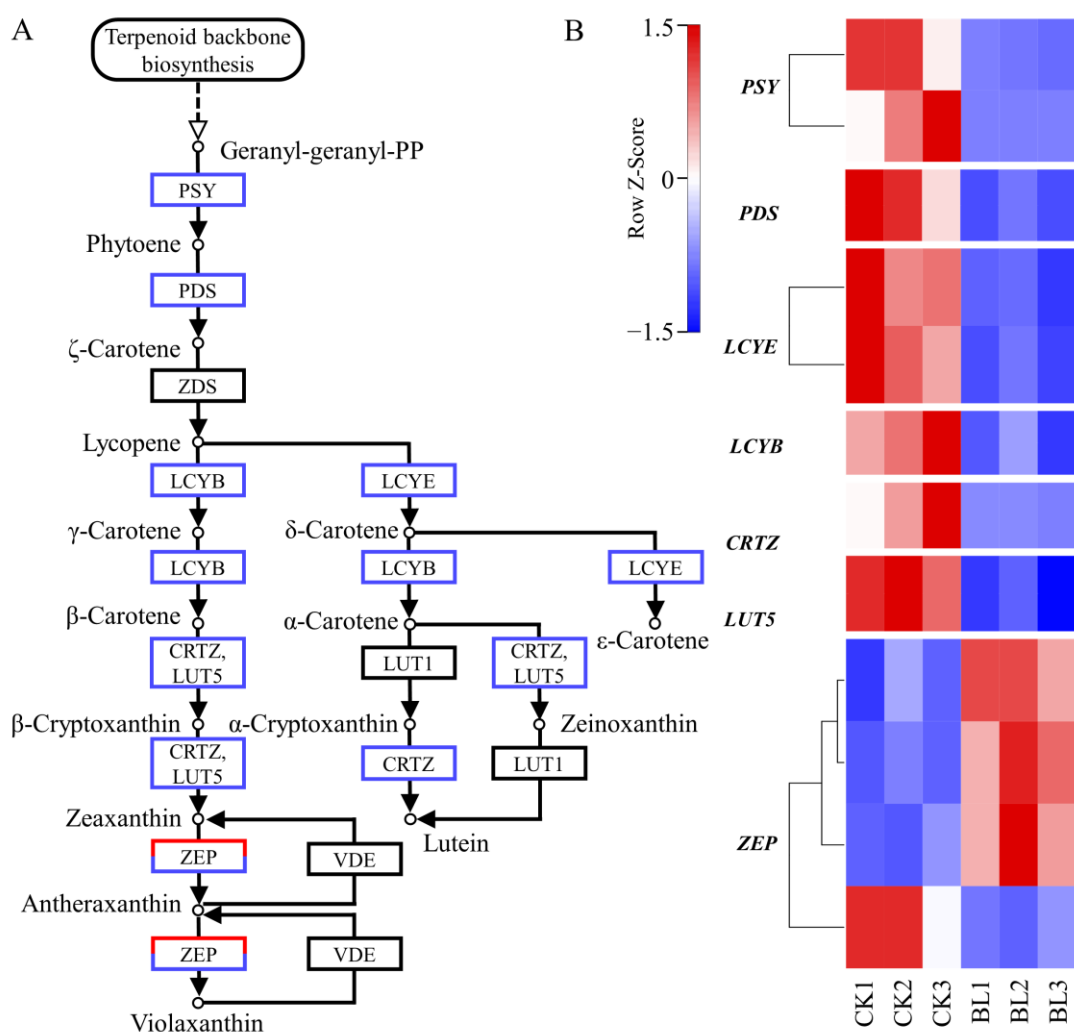

**Supplementary Figure S5.** The DEGs down-regulated in carotenoid biosynthesis were in the majority in BL treatment. **A:** Carotenoid biosynthesis pathway (<https://www.kegg.jp/entry/map00906> (accessed on 24 April 2022)); **B:** Expression heat maps of the DEGs in carotenoid biosynthesis in the 6 samples.

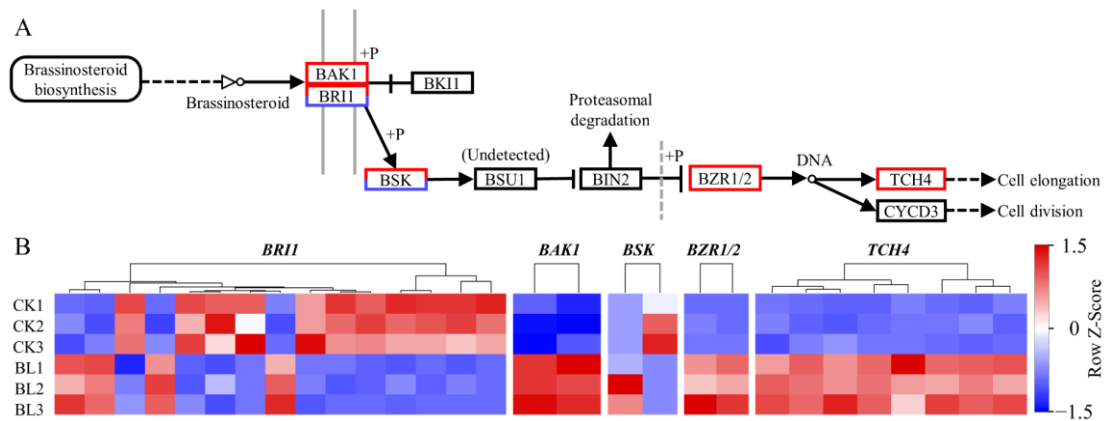

**Supplementary Figure S6.** Expressions of the DEGs in BR signaling. **A:** BR signaling pathway (<https://www.kegg.jp/entry/map04075> (accessed on 24 April 2022)), in the pathway, *BSU1* was not detected in *A. flabellulatum* gametophytes; **B:** Expression heat maps of *BRI1*, *BAK1*, *BSK*, *BZR1/2* and *TCH4* in the 6 samples, respectively.
