# Supplementary material for: Excavation of Genes Responsive to Brassinosteroids by Transcriptome Sequencing in Adiantum flabellulatum Gametophytes
Source: Genes (Basel). 2022 Jun 14;13(6):1061. doi: 10.3390/genes13061061 (PMC9222622; doi:10.3390/genes13061061)
Supplement: Supplementary file 1 [file genes-13-01061-s001.zip › Supplementary Tables.xlsx]

## Sheet: Supplementary Table S1
Supplementary Table S1 Information of primers used in qRT-PCR
Gene ID	Gene Name	Primer sequence (5’ to 3’)	Annealing (°C)	Size (bp)	Gene Sequence
isoform_78015	Lhca1	F：TCTCCTGCCTTCACACCC R：TCAAAGCCAAAGTCCCCG	60	128	TGTGTGTGTGGGGGGGAGAGAGAGAGAGCGAGAGCTATGGCGACTTCCACCGTTGCTTCCTCTGCACAGCTAGTCCCCTCTCTCTCCGTGCCGCTCACCAGGTCGAAGTTCTTGGGGTCTCCTGCCTTCACACCCGGCGCATTTGTCTCCAATGGGTCGCGTCTCTCCATGTCCGCCGAGTGGCTGCCTGGCCAGCCTCGCCCGGCGCATTTAGATGGATCTTCCCCCGGGGACTTTGGCTTTGATCCTCTTGGTCTTGCAGAGGTGCCTGAGAATTTTGAGCGATACAAGGAGTCTGAGCTCATTCACTGCAGATGGGCAATGCTTGCAGTGCCTGGCGTGCTTGTCCCAGAAGCCCTTGGTTTGGGTAACTGGGTCGATGCTCAGAAATGGGCTGCA…
isoform_68594	Lhca2	F：TTCAGTGCGGGCAGTAGC R：GCCAGGGAACCACAAAGG	60	232	ATGGACAGATTGTATTGTATGAGAGGAGGAAGCTGCTGAGTACAGTAGACTTCTTGGCACCCAACAGATTCTGCGTGCTCGAGATCGCATTTGCAAGGCCGACGCTTCAGTGCGGGCAGTAGCTGCAGTCGATCGTCGCGAGCTTGTGGCTATGGCGTCCGCTGTATGCTCCTCCAGCAGCCTCACAGCTGTGGCCGCTTCCAGCGTGAGCAAAAGCTCTTTCGTATCCGGACGGGCGTTGCGAGTCACACCCGCAGCATCTACCTTTACCCCATCAAAGCGGGCCCTCACCGTTGCAGCAGCAGCTGCCACTGACAGGCCTTTGTGGTTCCCTGGCAGCACTCCCCCCGAATGGCTCGACGGAAGTCTTCCTGGGGATTTCGGCTTTGACCCTCTTGG…
isoform_80079	Lhcb5	F：GGCAAAGGACCCAGATCA R：GAAGGTTATTGGCGAAAGG	60	167	TGTTTGGCAGCGGGAACCTTGGCAAGAGCTCGTGAGTGGAAAGAGAGTAGCGAGCGACGAGAGCAGCAGAAATGGCAGCCCTTGCAGGTTCTTCTTCCCTGCTGGCCAGGCCCGAGCTCTTGGGACAGGCCATCGCTGCCTCCACCCCGTCCTCTTCTTCCTCCATATCCTCCTCATCCCCCGCCATTGTGGCTATCTTAGGCAAGAAGAAGCCCAAGCCTTCTGCCAAGGCCGCCAAAGCCGCCCCCGCCAACGAGGAGCTCGCTAAGTGGTACGGTCCATCCCGGAGAATCTACCTCCCTGAGGGTTTGTTAGATAGATCTGAGGTGCCTGCCTACCTCACTGGAGAAGTACCTGGAGACTATGGATTTGATCCCTTCGGGCTTAGCAAGAAACCTG…
isoform_66365	PsbO	F: TGCCAAGGAAAACATAAAGG R: TCAAAGACACCGCCAATCT	60	102	AGTCGGAGCGTGGGAGGTTCGCATATTGTCTGTGCGGGAGAGAGAGCACCATGGCTGCTGCGTCTCTGACCTCACGAGTGGCCCCTTCTTTCATCCAGCCCGCACTGGAGAAGGTCTCACTCTCTGCCTCCTCCTTGAAGCCGGCATCTGTCTCAACGACGTTCGGTGTTAAGCCCTCCGCGAGGGTCTCCTGCTCTCTACAGGAAGACGTCAAGGAGCTGGCAGCCAAGTTCAGTGATGCTGGAAAGGTTGCTGCTGTGAGTCTGATCACCTCCGCGCTCATCGTCTCTGGAGCAAATGCAGAAGGACCTCCAAAGAGGCTCTCCTATGATGAGCTACAAGGGCTGACGTACATGGAAGTGAAGGGAAGTGGTATTGCGAACCAGTGTCCTGTGATCA…
isoform_83395	PsbP	F: CAAGACCTCCATCAAGGACTAT R: TCCCTCATCACCATCAGCA	60	223	CTCGGAAGTGTGTTTAGAGAGCGCGCTCAAGCAGCCAGGGAAAGGCTAATCACACACACACACACGCAGTAGGAGGTTACTGCAAGCAAGCGGGCAAATTCTCCATGGCTGCCTCAACCTCTGCTGCTCTCTCATTCTCCAACTTGGCGGCCGCATGCTCCTCTTCCGTCACAGGTTCTCCTCTGAGCTCCTCGAAGACACCTGCAAATGTCAAGGCTCAGGCCATCTTCACATGCCGCGCTCAAAAAGCTTCAGAAGGGGAGGTCCCTGCGGCGCCTGTCTCTAGACGTGCTGTGATCTCCATAGCCGCTGCCGCAGCGGCTGCTGTGGCTGCCGTTTTCGCTCCCATTCACCCTGCGGAAGCAACTTATGGCGAAGCAGCAAATATTTTTGGTGCTC…
isoform_84990	PsbQ	F：CTGCCTGGAACCGAGAAT R：GTTGATGTCGAAGCGAAGAT	60	219	CGAAGGCTTGAGGACGAAGGCTGGACAGCTTGAGCTTGGCCGGGGTCGACTTTTGAGGCAGAAGAAGAAGAAGAAGAAGAGCGATCACAAGAGCGAAAGAGAGGGGGAGATGGCAAGCACAACAGTATCCATGGCCGGCATTGTGTCGCCCACAACGCCTGCCTTGAACTCCACCTCCAAAGTCTCCACCTCTGCTGCCTCCTTCAAGCCCGCCATGCTGCCCATCCGCGCTAGCAGCTCTTCTCAACCCGCGGATCAGTGCTCCCGCCGCGCCCTCCTCTCTCTCCTCGCCACGGCCGCCCCTGCTATCCTCTTTGCGAAGGAGGCGCTCGCTGCTGCCACCAGCATCAAGGTGGCAGGCCCTCCTCCTCCCTTCGGTGGGCTGCCTGGAACCGAGAA…
isoform_58512	PsbS	F：TGTTTGTGGGCAGGATGG R：TTTCACTGATGGGCACTCC	60	117	AGGTAACGGGGGGGCCCCAACAACCTCTCACTCACACACTCTCCATCAAAAGTGCACTACTTGCGAGTGAGCAGAGCTAAACGGCCTTCATACACAGAGAGAAAGAGAGAGATCTTGCAAACCCTGCATTGTCTCCTCCTCCCTGCGCGTAGCCATCATGGCTCAATCTGCCCTTCTCTCTCGCTCCTCGTCGCTCGCTTCGTCCTTGGCAGACTTCCAGGCAGGCTCTCGCTTTGCGGCATCGCAGGCTCGCGGCCTCTCCTTCGCTCCTCTGCATTCTGCTAGGGTCTTCCAGTCTTCTCCTGTGAAGACAGTCGCCCTGTTTGGCACCAAAGCGCCCAAGAAGACTGCTGGCTCCAAGCCTACCCCAAAGACGAAGGGAAAGGTTGAGGATGGCAT…
isoform_104649	PsaE	F：AACGGTTGTTGCTGTGGAT R：TAGGGAATGGTAGTGCTTGG	60	160	AGCAGAAGCTTGCAGAGAGGAGAGAAGGTGTGCACGTCCCTCTCTCGCTAGGCGATTCTCTCACAGCAGAAAACATAATAGCAGCAATGGCGTCGTCCCTGGCAGCGTCAAGCACCTTTTCGTCCGTGGCTGCAGTGGGCTCATGCTCCCTCACACCCAGCCTTACCGTGCCATCGCGCGTGCAGCTCCGCCCAATTTCTTTTCCATCGCGGCTTTGCGTGCGCGCTGCCGAGGGTGAGGCCGCCGCCGCCCCTCCTGCCGCGAAGCCTGCCGAGAAGGCCAAACCCATCGGACCGCCTCGTGGATCCAAGGTAAAGATCTTGAGGCCTGAATCCTACTGGTTCAATGGTGTGGGAACGGTTGTTGCTGTGGATCAGGCTCCAGGGGTGCGATATCCTG…
isoform_90542	PsaL	F：GCAGGTCTGGTGGTTATCTTG R：GCCCATCCTTGAGCAGTTT	60	146	AGTGGGTGCTTCGATCGTTCGTGGAGCTGTGTTGAAGCCGTCGTGTGAATGAGTAGAGTGATGGCAACTGCAGCAGCGATGGCGCAAGCTTCGTCGATGGTGTCCTCGCCATCTTTGAACACATCGAAAGTGGCTGGATGCCCCCGCATGAATTCTGCATTTCTTGGCAAGGGCCTTGGTTTTGGAGCAGCTTTGCCCAAGCGGATCGTGGCTAGGTCTGTCGCCGTTCGAGCACAGGAGAAGTATCAAGTGATCGAGCCATTGAACGGGGATCCCTTTGTGGGTGGACTGGAGACTCCTATCACCAGCAGCCCGTTAATAGCCTGGTACCTCTCCAATCTACCGGCATACAGGACGGCCGTGAGCCCTCTGCTGCGGGGTATTGAGGTTGGGCTAGCG…
isoform_97688	PsaO	F：CGTCTGCTGCCTCTACCTC R：AGCCATCCGATCAAACCA	60	124	AATTGAGCTGAGCACAGTTGCAGAGACTCGAGAGCTCGTCTACGTGTAGTGAAGAGCAATCAGCAGAGATCTCCGAAAGAAGAGCAGGAATATGGCTGCCGTTGCGGGGATGAAGTGCGGCGTGGCTGCTGGGCTTCCTAGCCTCACCTGCGCTCCTCGAGGGGCTCGCGCATCCGCGGCCTCCTCTGTCAGCCTCACGTCTCCGTTTCTGCGCGGATCGTCTGCTGCCTCTACCTCCCTGACTTTGAGTAATGTGCGAGGCGACGCCCGCGTTACTTGCTTCACGAGGGACTGGCTTCGGACCGATTTGTCTGTGATTGGCTTTGGTTTGATCGGATGGCTCGCACCCTCTAGCATCCCTGCGATCAATGGCCAGAGCCTAACCGGTCTGTTCTTCAA…
isoform_37486	gamma	F：AGAGTCGGTGGCGAGTGA R：CAGCCTATGGCAACAGCA	60	227	ACGAGTCTGAAGGCAACAAGGCCCAGCACAGCTCCATTTCCTCTTTTACCCGCTTCACCCCCGTCGTCTCTCTCGCGCCTTTCCCAGCTCACATGGCGTGCTCCGCCCATCTGTCTCTCTCCAATCTGCACAGAAGCACCCCATGCCCTCACTTTGATGGCTTGTCTGCGAGGGCACTTGGGCTGAGGAGACAGGAAAGCTCGCCGTTTGGCAGCGATGGCGAGCTCAGCTCTGACCCCGAGGGCAAGAGGAGAAGCAGGACAACTGTTTGCTCGCTCAAGGATTTGCGTGACCGTATAGATAGTGTGAAGAGCACACAGAAGATCACTGATGCTATGAAGCTTGTTGCCGCCGCCAAGGTACGCCGTGCACAGGAAGCGGTCGTCAATGGTCGGCCAT…
isoform_67541	b	F：ACTCAAAACCCTACCCTTCG R：CGTCTCTGTCATCCATAACCTT	60	223	CATAAAACTGAAGGTGGTGTGGAATCGTGGATAAGGAGTATCCCATGTATGCACCATTCGTTCAGCATTTCTAACCTACATTCCTCCGACACTGTTTGCTTGTTTTCCCGGCGTGCTTGTGTGTTTTGCCTCCCGCAAGCCATGGAAGGTGTAGCAAGCGTGAGGGCGGCCACACCCACAGCCCTCTGTGTAGCAACAACGCCGTCCCCTACGTCGTCTTCGCGCTCCTTGTCATACCGCCTTCCCGCCATCAGAGGATCCCTCAAGCAGCAGGGATGCAACACATCTAGCAGCACCTCGCTTCAGGAAAGCCTACAGCGTATGGCAACCAAGATCACTCAAAACCCTACCCTTCGCAATGCTGCTTTCTTTGCGATGAATACACTCTGGACATTGCCC…
isoform_45822	ALDO	F：GGTCAGCATTCCCAACGG R：TCCACACTTTCTCTGCCACA	60	176	CCTCATAGAGCGTTGAGTGCACTTTTCGCAGGTAGAAGCACTTCAGCTTCTCTTTGCCTCTGCACACAGGAGACATGGCCGCCCTCCTCAAGCCCGCCGTTTCCCTGGCATCCTCTCAGTTCATGGGTCAATCCTTGAAGCCGGCGGTGGCCTCTTCTTCCGTCGCGACCACACAGCAGTACACCCCCCTTTCGATCCGGGCTGGATCCTATGCAGATGAACTCGTCAAGACTGCGAACTCTATTGCCTCCAAGGGCCGAGGTATTTTGGCCATGGATGAGTCCAATGCAACATGTGGAAAGCGCCTTGCTTCCATTGGCCTTGAGAACACTGAGGCAAATCGACAGGCATACCGCCAGCTTCTTGTTACAGCACCTGGGCTTGGCGAATACATCTCTG…
isoform_266684	SBPASE	F: CAGTTCGTTTATCTCTCCCAAG R: CATCATGCTACACAAGGTTCC	60	205	CTCTGCGTTGATACCACTGCTTACTAGTAAGCAGTGGTATCAACGCAGAGTACATGGTATATTTTTTTTTTTTTTTTTTTTTTTTTTTTTTCCACTCAAATTTGTTTAAGGTATGCAATGTTACAGGCTCAATGTTACAAGCTCGATCTTCTTGAGATTCTCAAGTAGGGAGTAATAGCACAATAGCAGAAGAAGTGAAAGACAGGTTGAGAAAGAAAAAATTGATGCCCTGAGCTTATGCACTGGCTGCACTCAGCACGGACGAGAGGCGAGATGATCCATATAGAGTCTCTTCGAAACGAATGATCTCATTCTTGGAGCCATATGCTACTTGTGTGCGGTCGTCAGTGCCCACAATCACCTTGTCCAGGACACTCTGCTTCCCATCACTACTGTATC…
isoform_59932	CYP90C1	F: GTGAAGCCTTGCGAACTGC R: GGCTAACATACACCTTCCAACC	60	116	ACACTTCTTGATTAAGGGCCTGCTAACTACAATTAGTGCTTGAGTAACCGAAGCCATGGAGTCGATGTCATGGGCGATAGCGGGCTTGTGTGTGTGCTTGGCCCTATTTTGGAAGCGGCTGATGGTTGTGACTATCAAGGGTTTGCCCCCCGGCTCCCTCGGCTTACCAGTCATCGGCCAAACCCTCCAATACATGCACGCTTCCTCCCCTCACCAGCTCGAACCCTTCCTTCAGCAAGGCCGCAAACGGTATGGCAAGATATTTAGAGCAAGCTTATATGGAAATTGGACCATAGTATCAACTGATGTGGATGTCAACAAATTTGTTCTACAAAATGAAGGAAGACTCTTTAAAGGCTATTGGCCCAAGTCTTTCTATAAGTTGTTTGGTCGATACTC…
isoform_304741	CYP92A6	F：GAGCCCCTCACTTACAATCTT R：AACGCATCCTTTCCCCAC	60	212	AAAGCGGCGAATGGAGGCCGTGCGCGACCGCGTGTATGCGACATTCCGCAAAGTGATCGAGGAGCGGCGGGCTAAAAGGAGGGCAGCAGGAGCTGATCCTGCATCAAAGGACCTGCTGGACGACCTGCTAGATCTGTCCGACGTCAACGACACCAATATTGAGTTTGGTATCCGCGTTACGGACCAAAACATAACAGCCGTGCTCATGGATATGTTTGCTGCTGGAACCGATACATCAGCATTTACAGTAGAATGGGCCATGGCAGAGCTACTTGCCAACCCTACCTTGATGAAGAAGGCACGAGATGAGCTAGATCTTGTAGTTGGCAAGGAACGCCTCGTGAAGGATACAGACATTCCCAGGCTTCCCTACTTACAAGCAGTTGTTAAGGAGACTTT…
isoform_299999	TCH4	F：TGCTCCTGGACCAAAACAC R：CTGCCCCGACTCATTACC	60	188	CCGCCCATCGCATCAGCCTTGCCGTGCTCCAGTAGCGCAAGATAGAGAGCGCCTTAGCTGGCGCCCCCTCATGCAAGGCATGGCCTGGCCGCTGCCGTACTACACTCTCCCCCCATTTATATGCATGCCATTTTCCGAGCACTCTACAGTGATCGCAACCCCCCCCCCCCCCCCCCCCCCAAACTCTTCCCCCTCTTCTCTCTCTCTCTCTCTCTCTCTCTCTCTCTAGAGAGGTGCTTCCTCCCTCCAGCCCCTACAGTAACTCGCTTACCGACGTTACCGTTGAAGTCTGCTGTGGACGATCAACTCGCGCCAGCTTGATGGAGCGGTTCGGCCTCCTTCTGTGGTTTCTCTCTTCTCTACTGCTGCTTTTCAGTTCCGTCACTATTGCAGCGCCTG…
isoform_33804	ACSF	F：ACACTCTACTCACACCCCGC R： TCCTGGAGCAAAGCATCAA	60	115	TGGGCAAATGGAGTCGTGAGCTGAAAGTTGTAGAGCAGTGAACTTCGGTGTGCGAGGCTCTCTGCCTCTCTCTCTGCGCGAAAATGGCTATGGCGACGGCGGCCCTGTCCTCCTCGTGCTCGTCGGAGTTCGCGGTTAGCCGTGTCTCACCTGCTTCCGCGCGGCTGGGCTCCATCTCTCTCACCCTCAAACCGTACCCCCTTTCCTCAACGGCGCTTTCCGCTCACAGAGTCTCCATGGATGCGTCTGTGGCAGAGAAACCCAAAGCAGGTGCCAAGGAGTTGGCCAAGGACACTCTACTCACACCCCGCTTCTACACCACTGATTTCGACGAGATGGAGCGCATGTTTAACAAGGAAATCAACAAGAATCTGAAGCAGGAGGAGTTTGATGCTTTGC…
isoform_38906	Actin	F：AGTCTTTCTCTTTTCCTCGCA R：GTCTCCAGCAAACCCAGC	60	231	CCATTGCAAGTCTTTCTCTTTTCCTCGCAGAAAGGGGAAGACCGGCCTCTCTTCCTGCGTGCTTCTCCCCTCCTCTGCGCATCGTCAAGGTCGCCATTGGAGCTCTGCAGATCGTCCGCCTTACTTCCTTGCTGCGCAGGTGTAAAACATAAGTCAAGAAAATGGCGGATGCCGAGGAAGTGCAACCTCTTGTGTGTGACAATGGTTCCGGTATGGTGAAGGCTGGGTTTGCTGGAGACGATGCACCTCGAGCTGTATTCCCTAGCATTGTGGGCAGGCCCCGGCACACAGGTGTCATGGTTGGTATGGGTCAGAAAGATGCATATGTAGGTGACGAAGCACAGTCAAAGCGGGGTATTCTGACATTGAAGTATCCTATTGAGCATGGCATCGTGACAA…
Note: isoform_38906 (Actin) was used as the reference gene

## Sheet: Supplementary Table S2
Supplementary Table S2 Summary of transcriptome data for the 6 samples
Samples	Total Raw Reads (M)	Total Clean Reads (M)	Total Clean Bases (Gb)	Clean Reads Q20 (%)	Clean Reads Q30 (%)	Clean Reads Ratio (%)	Total Mapping(%)	Uniquely Mapping(%)
CK 1	43.82	42.15	6.32	97.53	93.31	96.19	84.64	5.53
CK 2	43.82	42.13	6.32	97.47	93.09	96.14	83.73	5.51
CK 3	43.82	42.27	6.34	97.41	93	96.46	84.33	5.76
BL 1	43.82	42.39	6.36	97.35	92.81	96.74	87.76	4.36
BL 2	43.82	42.39	6.36	97.48	93.17	96.74	86.51	4.66
BL 3	43.82	42.41	6.36	97.41	92.98	96.78	86.91	4.67
Average			6.34333	97.4417	93.06
Minimum			6.32	97.35	92.81
Note: Each treatment had three biological replicates.

## Sheet: Supplementary Table S3
Supplementary Table S3 The expression proﬁles of 210,415 isoforms in the 6 samples
Gene ID	Fpkm CK1	Fpkm CK2	Fpkm CK3	Fpkm BL1	Fpkm BL2	Fpkm BL3	Average Fpkm CK	Average Fpkm BL	log2FC (CK vs BL)	Q-value (CK vs BL)
isoform_0	7.71	9.21	7.9	6.95	7.5	6.27	8.273	6.906	0.106691	0.793851
isoform_1	0.03	0.01	0.03	0.01	0.03	0	0.023	0.013	0.327657	0.914611
isoform_10	0.02	0.01	0.01	0.06	0.01	0.02	0.013	0.03	-0.91813	0.773636
isoform_100	16.61	18.8	17.09	18.16	19.68	18.69	17.5	18.843	-0.255487	0.0335731
isoform_1000	0.43	1.17	0	0	0	0.67	0.533	0.223	0.451016	0.875499
isoform_10000	0	0	0.04	0	0	0	0.013	0	0.449952	0.793851
isoform_100002	3.13	3.3	2.98	2.51	3.05	5.42	3.136	3.66	-0.349548	0.793851
isoform_100003	1.15	0.87	0.43	1.55	1.83	1.07	0.816	1.483	-0.874516	0.570209
isoform_100004	0	0	0	7.1	0	0	0	2.366	-1.31884	0.62086
isoform_100005	2.48	0	0	3.5	5.64	0	0.826	3.046	-0.805528	0.793851
isoform_100006	6.11	9.29	8.06	6.71	10.71	7.07	7.82	8.163	-0.2105	0.793851
isoform_100009	0.37	0.21	0	0	0	0	0.193	0	1.3704	0.61818
isoform_10001	0.53	0.48	0.56	0.32	0.27	0.49	0.523	0.36	0.385987	0.793851
isoform_100010	1.22	0	0.29	0	0	0.13	0.503	0.043	1.50349	0.572344
isoform_100011	0	0	0.22	0.23	0	0	0.073	0.076	-0.047544	0.995877
isoform_100012	0	0	0.17	0	0.29	0.48	0.056	0.256	-1.15657	0.733439
isoform_100013	31.29	26.01	35.47	0	0	3.46	30.923	1.153	1.94764	0.334372
isoform_100014	0	0.08	0	0.05	0	0.59	0.026	0.213	-0.883127	0.764138
isoform_100016	7.62	8.6	10.61	10.24	7.9	6.59	8.943	8.243	-0.046355	0.972041
isoform_100017	5.37	0.52	2.88	5.37	4.21	4	2.923	4.526	-0.68503	0.77089
isoform_100019	14.16	10.62	23.98	6.94	10.77	12.74	16.253	10.15	0.521115	0.624184
isoform_10002	7.27	2.01	9.31	5.58	6.17	7.36	6.196	6.37	-0.167338	0.910936
isoform_100021	2.57	1.51	6.35	3.86	6.19	0	3.476	3.35	-0.0793345	0.995877
isoform_100024	14.26	11.33	6.13	11.08	18.44	14.22	10.573	14.58	-0.585683	0.485501
isoform_100025	1.1	0.46	0.76	0.15	0.4	0.39	0.773	0.313	1.09246	0.59671
isoform_100026	0	0	0	0	0	0.1	0	0.033	-0.471476	0.793851
isoform_100027	7.56	4.41	9.32	3.28	2.17	4.46	7.096	3.303	0.900885	0.265719
isoform_100028	9.57	8.1	9.31	6.71	9.85	9.39	8.993	8.65	-0.0857254	0.898728
isoform_100029	24.97	24.62	21.31	20.05	19.35	12.61	23.633	17.336	0.278592	0.734472
isoform_10003	0	0.67	0	0	4.48	0	0.223	1.493	-0.607096	0.793851
isoform_100031	0	0	0	0.67	0	0	0	0.223	-0.895977	0.764138
isoform_100034	1	1.57	4.01	0.53	3.34	2.57	2.193	2.146	-0.0810138	0.987667
isoform_100038	0.73	0.29	0.45	0.42	0.44	0.56	0.49	0.473	-0.0736915	0.991797
isoform_100039	0	1.56	0	0	0	0	0.52	0	1.02191	0.733439
isoform_10004	2.47	0	2.72	2.01	2.07	1.07	1.73	1.716	-0.103832	0.98726
isoform_100040	0.71	2.45	0.64	3.24	0.76	0	1.266	1.333	-0.210886	0.951085
isoform_100041	14.6	14.05	14.58	10.6	16.68	12.05	14.41	13.11	-0.0107198	0.995877
isoform_100042	0	0	0	1.39	0	0	0	0.463	-1.02972	0.731079
isoform_100045	2.75	3.56	4.03	0.53	1.22	2.11	3.446	1.286	1.22284	0.166189
isoform_100046	1.13	0.63	0.83	1.08	1.5	0.5	0.863	1.026	-0.363617	0.818288
isoform_100049	3.86	3.58	4.18	11.97	11.94	7.54	3.873	10.483	-1.55878	5.06922e-05
isoform_10005	32.99	28.87	33.58	25.48	28.79	28.24	31.813	27.503	0.0633018	0.794936
isoform_100050	0.01	12.17	8	1.98	0	5.86	6.726	2.613	0.66791	0.793851
isoform_100051	0.13	0.13	0	7.7	15.01	12.52	0.086	11.743	-6.00018	4.48929e-15
isoform_100053	189.39	125.74	173.32	70.95	65.07	89.99	162.816	75.336	0.953045	0.000399158
isoform_100055	55.68	53.89	61.11	53.74	57.07	59.89	56.893	56.9	-0.151014	0.536421
isoform_100057	11	13	16	5.77	4.94	8.56	13.333	6.423	0.890566	0.0334263
isoform_100058	0	0	5.51	14.03	5.34	10.07	1.836	9.813	-1.51966	0.549935
isoform_10006	4.66	3.98	4.22	4.22	4.85	3.29	4.286	4.12	-0.0894361	0.887073
isoform_100060	0.21	0.37	0.22	0.47	0.31	0.32	0.266	0.366	-0.499101	0.795035
isoform_100061	0	1.49	0	0	0	0	0.496	0	1.02191	0.733439
isoform_100062	0	0	0.12	0	0	0	0.04	0	0.449952	0.793851
isoform_100063	0	0	0	0	0.17	0	0	0.056	-0.474775	0.793851
isoform_100065	115.79	44.92	64.19	3.68	0.65	13.58	74.966	5.97	3.02042	0.00106107
isoform_100066	3.71	2.34	1.42	2.55	2.99	2.83	2.49	2.79	-0.297959	0.793851
isoform_100068	0	0	0	10.05	3.15	4.68	0	5.96	-5.53668	8.45841e-08
isoform_100069	0	0	0	0	0	0.61	0	0.203	-0.844156	0.774669
isoform_100070	0.47	0.64	0.42	0.1	0.61	0.22	0.51	0.31	0.450439	0.826699
isoform_100071	1.42	0	0.43	1.1	1.08	0.88	0.616	1.02	-0.640761	0.793851
isoform_100074	0.17	0	0	0	0	0	0.056	0	0.454616	0.793851
isoform_100079	0	3.85	9.17	29.22	1.74	4.43	4.34	11.796	-1.11231	0.727866
isoform_10008	6.22	5.83	6.6	4.81	7.51	6.82	6.216	6.38	-0.177418	0.765516
isoform_100080	0	0	0	0.6	0.81	1.25	0	0.886	-3.82608	0.00209071
isoform_100081	0.85	0.25	0.84	1.14	0.56	0.3	0.646	0.666	-0.165042	0.955892
isoform_100082	1.26	1.91	2	5.82	5.91	6.02	1.723	5.916	-1.87182	1.672e-06
isoform_100083	8.27	6.64	1.83	3.82	2.14	1.39	5.58	2.45	0.907361	0.60508
isoform_100085	3.83	5.43	8.51	6.52	5.4	10.5	5.923	7.473	-0.472269	0.725877
isoform_100086	0	0	0	0	0.16	0	0	0.053	-0.474775	0.793851
isoform_100087	0	0.81	0	0.66	0	0	0.27	0.22	0.00942875	0.996233
isoform_100088	1.91	3.4	1.61	0	0.42	1.58	2.306	0.666	1.27944	0.572413
isoform_100089	4.48	1.66	4	1.52	5.4	3.63	3.38	3.516	-0.142135	0.94358
isoform_10009	6.97	4.02	2.32	1.64	0	2.1	4.436	1.246	1.24673	0.61857
isoform_100094	0	0	0	1.8	0	6.11	0	2.636	-2.94013	0.0548286
isoform_100095	0	0	0	0.29	0.6	0	0	0.296	-1.93797	0.333505
isoform_100097	43.66	34.79	40.29	22.65	27.17	27.35	39.58	25.723	0.472475	0.02873
isoform_100098	5.18	0	3.83	0	12.4	0	3.003	4.133	-0.137834	0.971868
isoform_1001	0.2	0	0.21	0	0.07	0.36	0.136	0.143	-0.0809697	0.995877
isoform_10010	0.05	0	0	0	0	0.06	0.016	0.02	-0.00757243	0.996749
isoform_100100	0.62	0.69	0.37	0.48	0.25	0.37	0.56	0.366	0.450135	0.80864
isoform_100101	7.73	5.88	12.73	0.81	1.85	1.63	8.78	1.43	2.34676	2.45651e-05
isoform_100102	0.12	0	0.12	0	0	0	0.08	0	1.03851	0.734472
isoform_100103	0	2.58	0	0.38	0	0	0.86	0.126	0.700495	0.793851
isoform_100104	1.53	1.65	1.53	0.68	0.79	0.79	1.57	0.753	0.851474	0.431745
isoform_100105	149.18	44.35	112.22	11.58	2.47	13.82	101.916	9.29	2.99916	2.49103e-05
isoform_100106	0	0.65	0.46	0.71	0.39	0	0.37	0.366	-0.0857125	0.995877
isoform_100107	1.99	0.53	0	1.6	0.81	0.5	0.84	0.97	-0.266545	0.932435
isoform_100108	1.87	3.71	0	1.44	0	0.28	1.86	0.573	0.800558	0.793851
isoform_10011	16.73	16.75	18.63	17.14	17.46	16.64	17.37	17.08	-0.127089	0.70993
isoform_100110	18.06	17.22	18.17	15.06	17.34	22.25	17.816	18.216	-0.182458	0.75844
isoform_100111	0	0.06	0	0.02	0	0.13	0.02	0.05	-0.471476	0.793851
isoform_100113	1.06	0	0	0	0	0	0.353	0	0.961507	0.746597
isoform_100115	7.12	18.63	6.41	0	8.44	10.5	10.72	6.313	0.477609	0.843734
isoform_100116	0.29	0.81	0	0.83	0.74	1.31	0.366	0.96	-1.28271	0.563552
isoform_100119	19.57	17.01	23.95	3.02	11.39	17.89	20.176	10.766	0.733358	0.594899
isoform_10012	0	0	0.23	0	0.83	0	0.076	0.276	-0.495311	0.83283
isoform_100120	0	0	1.2	0	0.16	0	0.4	0.053	0.844033	0.793851
isoform_100121	0	0.86	0	0	0	0	0.286	0	0.915257	0.756427
isoform_100122	10.31	13.48	11.25	2.18	10.66	9.38	11.68	7.406	0.508183	0.766332
isoform_100123	3.14	3.49	0	7.51	10.65	6.91	2.21	8.356	-1.64361	0.308558
isoform_100124	0.6	0.17	0.79	0	0.18	0	0.52	0.06	2.05414	0.263139
isoform_100126	0	0.54	0.39	6.53	21.83	19.84	0.31	16.066	-5.21526	9.49663e-13
isoform_100128	1.72	0	1.67	0.49	0	0	1.13	0.163	1.20032	0.725761
isoform_10013	1.98	1.27	1.93	5.43	5.27	3.76	1.726	4.82	-1.60317	4.40541e-06
isoform_100130	11.44	8	11.13	3.94	7.96	5.84	10.19	5.913	0.628262	0.308764
isoform_100131	9.07	8.92	10.84	4.62	4.53	3.06	9.61	4.07	1.05394	0.00601402
isoform_100132	0	0.12	0	0	0	0	0.04	0	0.45071	0.793851
isoform_100133	1.87	4.23	6.2	1.72	4.67	6.09	4.1	4.16	-0.139486	0.944029
isoform_100134	4.84	9.24	0	10.65	5.67	10.92	4.693	9.08	-0.816436	0.793851
isoform_100135	0	0	0	0	0	0.21	0	0.07	-0.640986	0.793851
isoform_100137	0	0	0	0	0.54	0	0	0.18	-0.846408	0.774669
isoform_100138	0	4.99	0	0	0	0	1.663	0	1.22526	0.664703
isoform_10014	0.32	0.18	0.12	0.14	0.16	0.14	0.206	0.146	0.324434	0.865466
isoform_100142	0	0	0	0	0.18	0	0	0.06	-0.474775	0.793851
isoform_100145	0.16	0.11	0	1.21	1.23	2.06	0.09	1.5	-3.52512	0.00053974
isoform_100146	0.1	0.11	0.1	0.1	0	0.1	0.103	0.066	0.283969	0.932906
isoform_100148	0	0	0.41	0	0.03	0.27	0.136	0.1	0.140149	0.972311
isoform_100149	5.15	7.14	3.49	0.7	3.9	2.26	5.26	2.286	0.989799	0.471042
isoform_10015	13.07	0.27	9.33	6.64	11.05	8.17	7.556	8.62	-0.240388	0.935436
isoform_100151	2.51	3.03	3.8	2.34	2.54	3.29	3.113	2.723	0.0504131	0.978465
isoform_100153	0	0	0	0	1.21	0	0	0.403	-1.0063	0.734472
isoform_100155	0	0	0	0	0	0.1	0	0.033	-0.471476	0.793851
isoform_100156	0	3.74	6.29	8.88	35.83	13.92	3.343	19.543	-2.03679	0.170812
isoform_100157	4.62	1.96	5.99	0	1.73	1.38	4.19	1.036	1.48953	0.407468
isoform_100158	9.29	14.75	9.12	12.45	13.53	6.08	11.053	10.686	-0.115788	0.929061
isoform_10016	1.37	3.42	0.83	2.9	2.74	2.46	1.873	2.7	-0.649521	0.670147
isoform_100160	0.11	0.32	0.21	0	0	0	0.213	0	2.07322	0.280168
isoform_100162	0	0	0	0	0.1	0	0	0.033	-0.474775	0.793851
isoform_100164	10.76	13.63	8.82	15.26	15.67	18.72	11.07	16.55	-0.731852	0.0172909
isoform_100165	0	0	1.37	1.58	0	1.27	0.456	0.95	-0.530841	0.841609
isoform_10017	0	0.06	0.09	0.11	0	0	0.05	0.036	0.0601572	0.995877
isoform_100174	0.65	0	2.42	6.38	1.82	5.77	1.023	4.656	-1.76744	0.296149
isoform_100175	0.44	0	0	0	0.33	0.31	0.146	0.213	-0.267614	0.936153
isoform_100178	1.15	0	0.75	0.91	0	0	0.633	0.303	0.305837	0.92576
isoform_100179	0	0	0	0	1.23	0	0	0.41	-1.02242	0.733439
isoform_10018	0.32	0.07	0.29	0.24	0	0	0.226	0.08	0.724814	0.793851
isoform_100181	5.27	5.24	4.33	2.82	3.73	5.85	4.946	4.133	0.125188	0.906941
isoform_100182	8.39	8.08	7.61	7.36	12.09	19.5	8.026	12.983	-0.802959	0.208451
isoform_100183	0.53	0	0	0	0.25	1.07	0.176	0.44	-0.524716	0.844693
isoform_100185	1.2	1.82	0.71	0.68	0.58	0.57	1.243	0.61	0.880477	0.631572
isoform_100186	0.63	0	0.13	1.92	2.56	2.18	0.253	2.22	-2.67417	0.0126661
isoform_10019	2.11	2.39	2.37	1.36	1.62	1.3	2.29	1.426	0.537194	0.129302
isoform_100190	6.4	4.24	2.64	7.39	5.47	0	4.426	4.286	-0.108696	0.985865
isoform_100191	1.6	0	0	0	0	1.71	0.533	0.57	-0.0323464	0.995877
isoform_100192	4.13	5.86	2.29	5.02	5.15	4.31	4.093	4.826	-0.391054	0.781667
isoform_100194	0	0.64	0.34	0.39	1.8	1.83	0.326	1.34	-1.58643	0.400686
isoform_100195	0	4.29	0	0	0	0	1.43	0	1.1801	0.680813
isoform_100196	3.92	0.02	3.65	1.71	0.69	0.52	2.53	0.973	0.855261	0.793851
isoform_1002	4.84	5.35	5.42	5.36	5.29	6.56	5.203	5.736	-0.287558	0.197222
isoform_10020	3.01	12.55	5.38	5.04	5.71	4.86	6.98	5.203	0.251308	0.832673
isoform_100200	1.43	2.09	1.08	1.22	0.68	1.33	1.533	1.076	0.312789	0.82787
isoform_100201	0	0.47	0	0	0	0	0.156	0	0.768574	0.793851
isoform_100203	0.46	0	0.56	0.15	0	0	0.34	0.05	1.34637	0.658562
isoform_100204	7.81	8.37	10.07	32.99	0	21.61	8.75	18.2	-0.727452	0.793851
isoform_100205	0.61	0	0	0	0	0	0.203	0	0.819712	0.783764
isoform_100206	2.22	0.88	0.61	1.06	0.59	1.74	1.236	1.13	0.00591212	0.996853
isoform_100209	0.47	0	0	1.61	0	0	0.156	0.536	-0.579423	0.793851
isoform_10021	0.6	0.75	0.79	0.79	0.62	0.42	0.713	0.61	0.0799399	0.960485
isoform_100210	6.02	18.24	11.46	85.11	95.7	59.28	11.906	80.03	-2.81543	2.49901e-10
isoform_100211	0.29	0	0.17	0	0.01	0.5	0.153	0.17	-0.185525	0.961973
isoform_100212	2.75	2	3.08	5.19	5.78	5.45	2.61	5.473	-1.21469	0.00120448
isoform_100213	6.16	4.68	3.76	5.98	3.18	4	4.866	4.386	-0.00885549	0.995877
isoform_100214	7.97	16.35	16.97	5.04	8.72	8.85	13.763	7.536	0.708144	0.32826
isoform_100215	0	0	0	0	5.4	4.89	0	3.43	-3.23942	0.0258801
isoform_100216	0	0	0	0	0	1.27	0	0.423	-1.02094	0.733439
isoform_100217	0.55	0.2	0	0	2.66	2.15	0.25	1.603	-1.59793	0.508396
isoform_100218	0	0	0	0	0.98	0	0	0.326	-0.96792	0.74411
isoform_10022	9.15	5.68	9.66	7.27	9.71	4.13	8.163	7.036	0.0589031	0.969937
isoform_100220	0	0	0	0.33	0	0.37	0	0.233	-1.73842	0.430118
isoform_100223	0	0	0	1.62	0	0	0	0.54	-1.04389	0.725877
isoform_100225	0	0	0.04	0	0	0	0.013	0	NA	NA
isoform_100227	0	1.13	0	0.44	1.04	1.57	0.376	1.016	-0.945331	0.786123
isoform_100228	0.12	0	0.12	0	0	0	0.08	0	1.03851	0.734472
isoform_100229	0	1.55	0	0	0	0	0.516	0	0.887969	0.764138
isoform_100230	0.31	4.57	0.89	0	0	0	1.923	0	3.7266	0.00471733
isoform_100231	11.91	5.76	6.51	9.77	6.78	9.87	8.06	8.806	-0.271195	0.793851
isoform_100232	0	0.28	0	0.24	0.26	0	0.093	0.166	-0.488151	0.863441
isoform_100234	0.33	0	0	0	0.92	0.45	0.11	0.456	-0.942879	0.791471
isoform_100235	0	0.35	0	0	0	0	0.116	0	0.705766	0.793851
isoform_100236	0.11	0.43	0.21	0.05	0	0	0.25	0.016	2.17815	0.238238
isoform_100237	0	0	0	0	0.09	0	0	0.03	NA	NA
isoform_100239	4.3	2.04	2.89	0.81	0.84	3.02	3.076	1.556	0.790906	0.681178
isoform_10024	0.02	2.96	5.13	6.59	7.97	4.92	2.703	6.493	-0.856543	0.793851
isoform_100240	163.97	152.71	130.31	185.36	279.95	414.29	148.996	293.2	-1.09457	0.00172587
isoform_100242	0	0	0	1.01	0	0.45	0	0.486	-2.12465	0.256139
isoform_100243	46.55	30.31	47.78	33.31	34.62	45.64	41.546	37.856	-0.0147997	0.995877
isoform_100245	0	0	0	0	0	0.82	0	0.273	-0.942691	0.750386
isoform_100247	0	0.22	0	0	0	0.11	0.073	0.036	0.24438	0.935436
isoform_100248	3.66	2.53	3.2	0	0	5.27	3.13	1.756	0.39785	0.896171
isoform_10025	24.64	28.3	19.67	14.4	16	14.05	24.203	14.816	0.55542	0.0204886
isoform_100250	0	0	0	0	0	0.9	0	0.3	-0.96616	0.74411
isoform_100251	16.47	12.06	22.53	12.23	11.37	13.97	17.02	12.523	0.286488	0.756427
isoform_100254	3.17	2.06	1.01	0.56	0.86	0.23	2.08	0.55	1.60342	0.182911
isoform_100255	0	0	0.66	0	0	0	0.22	0	0.816362	0.783764
isoform_100256	0.72	0.2	0.21	0.37	0.19	0	0.376	0.186	0.678155	0.793851
isoform_100257	0.47	0	0	0	0	0	0.156	0	0.771526	0.793851
isoform_100258	0.43	0	0.44	0.74	0	0	0.29	0.246	0.00854493	0.996749
isoform_10026	0.02	0.05	0.03	0	0	0	0.033	0	1.23958	0.674912
isoform_100264	53.88	38.7	56.04	38.2	41.68	56.26	49.54	45.38	-0.017699	0.995877
isoform_100265	0	0.53	0	0	0	0	0.176	0	0.768574	0.793851
isoform_100268	0.92	0.3	0.29	0	0.32	0.56	0.503	0.293	0.373986	0.893483
isoform_100269	25.05	19.98	25.83	29.78	41.48	45.03	23.62	38.763	-0.851221	0.000366831
isoform_10027	1.65	0	5.87	5.45	5.85	1.3	2.506	4.2	-0.515224	0.851054
isoform_100270	0	0	0.85	0.52	0	0	0.283	0.173	0.0771973	0.995877
isoform_100271	1.68	2.18	9.92	0.03	0	0	4.593	0.01	4.98294	8.22155e-06
isoform_100272	4.35	3.22	3.76	4.08	4.48	5.97	3.776	4.843	-0.487268	0.513178
isoform_100274	0.25	0	0	0	0.26	0.22	0.083	0.16	-0.456492	0.875992
isoform_100275	0	0	0	0	0	0.27	0	0.09	-0.640986	0.793851
isoform_100276	0	0.54	0.73	0.87	0.73	0.83	0.423	0.81	-0.928501	0.734372
isoform_100280	4.99	1.5	3.14	2.84	2.66	3.47	3.21	2.99	-0.0325742	0.995877
isoform_100282	32.04	22.23	32.78	23.8	27.77	22.95	29.016	24.84	0.0736518	0.912296
isoform_100283	60.89	66.62	50.89	60.41	77.61	99.58	59.466	79.2	-0.551791	0.0665556
isoform_100285	5.9	14.66	11.21	3.16	10.53	11.97	10.59	8.553	0.17207	0.917934
isoform_100287	4.26	5.27	3.92	4.33	4.2	3.12	4.483	3.883	0.0544802	0.967194
isoform_10029	1.24	1.99	1.34	0.48	1.58	1.05	1.523	1.036	0.410751	0.793851
isoform_100290	0.43	0.51	0.27	0.41	0.43	0.16	0.403	0.333	0.0388027	0.995877
isoform_100291	0	0	0	0	0.11	0	0	0.036	-0.474775	0.793851
isoform_100293	0.95	0.11	0.32	0.2	0	0.61	0.46	0.27	0.41561	0.881958
isoform_100294	3.54	0	0	1.24	0	0	1.18	0.413	0.332672	0.905305
isoform_100295	0.61	0.23	0.29	0.22	0.3	0.11	0.376	0.21	0.573599	0.793851
isoform_100296	9.52	12.4	8.75	5.43	4.38	7.57	10.223	5.793	0.659953	0.215261
isoform_100297	11.88	12.33	10.8	8.87	11.04	17.44	11.67	12.45	-0.22662	0.793851
isoform_100298	0	0	0.39	0	0	0	0.13	0	0.705161	0.793851
isoform_100299	0.36	0.74	0.98	0	0	0.62	0.693	0.206	0.935247	0.786123
isoform_100301	0.18	0.48	0	0.16	0.03	0	0.22	0.063	0.885056	0.793851
isoform_100303	0	0	0.22	0	0	0.34	0.073	0.113	-0.170179	0.96094
isoform_100304	0	1.17	0	0	5.8	0	0.39	1.933	-0.612397	0.793851
isoform_100305	0	0	1.73	0	0.36	0	0.576	0.12	0.596584	0.793851
isoform_100306	0.44	0	0	0	0	0.44	0.146	0.146	-0.00581378	0.997496
isoform_100307	0	0	0.14	0	0	0.15	0.046	0.05	-0.016198	0.995877
isoform_100308	0.37	2.13	4.79	1.01	0.68	0.91	2.43	0.866	1.09107	0.625245
isoform_10031	0.02	0.02	0.02	0	0	0.02	0.02	0.006	0.746807	0.793851
isoform_100311	0	0	0	0.38	0	0	0	0.126	-0.747003	0.793851
isoform_100312	0	0	0.12	0	0	0	0.04	0	0.449952	0.793851
isoform_100313	0.58	0.75	0.76	0.25	0.86	0.27	0.696	0.46	0.483598	0.793851
isoform_100315	1.38	0	0	2.82	6.16	3.96	0.46	4.313	-2.2022	0.184106
isoform_100316	0.94	1.66	0.01	0	2.33	4.51	0.87	2.28	-0.863695	0.793851
isoform_100319	0.14	0.43	0.56	0	0	0	0.376	0	2.48644	0.137644
isoform_10032	4.05	6	5.83	3.31	4.54	3.84	5.293	3.896	0.289173	0.631904
isoform_100321	1.57	0.71	0.44	0.88	1.8	0	0.906	0.893	-0.107068	0.986601
isoform_100322	79.62	70.44	73.56	62.95	92.99	128.99	74.54	94.976	-0.481242	0.290416
isoform_100324	0.23	0	0.82	0	0	0.57	0.35	0.19	0.331119	0.916884
isoform_100325	0	3.71	0	0.1	0	0.2	1.236	0.1	1.15975	0.706825
isoform_100326	2.33	2.28	3.02	2.28	1.46	1.87	2.543	1.87	0.268244	0.804996
isoform_10033	0	0	1.08	1.48	2.7	1.63	0.36	1.936	-1.52276	0.5462
isoform_100331	6.43	8.35	8.32	2.36	5.13	3.3	7.7	3.596	0.945691	0.0652461
isoform_100332	0	0.66	1.01	0	0	0.73	0.556	0.243	0.441548	0.88003
isoform_100333	17.76	17.51	24.13	28.56	38.46	21.84	19.8	29.62	-0.722883	0.0815669
isoform_100334	148.94	126.93	181.68	150.92	136.95	172.14	152.516	153.336	-0.160931	0.793851
isoform_100336	0.78	0.45	0.63	3.03	4.12	2.51	0.62	3.22	-2.40207	0.00021276
isoform_100338	8.63	9.13	12.03	4.39	11.8	8.42	9.93	8.203	0.139819	0.901721
isoform_100339	1.88	1.35	2.54	0	0	2.02	1.923	0.673	0.83979	0.793851
isoform_10034	6.28	5.59	7.33	3.96	4.39	5.98	6.4	4.776	0.279627	0.62308
isoform_100341	10.85	7.73	3.42	0.58	5.8	5.19	7.333	3.856	0.717006	0.765545
isoform_100343	0	0	0.82	0	0.74	0	0.273	0.246	-0.0197658	0.995877
isoform_100345	16.62	14.21	16.07	5.81	7.92	7.83	15.633	7.186	0.965015	9.24338e-05
isoform_100346	0	0.11	0	0	0	0.12	0.036	0.04	-0.0152188	0.995877
isoform_100347	0	0	0	0	0	0.67	0	0.223	-0.844156	0.774669
isoform_100349	0	0.33	0	0	0	0	0.11	0	0.705766	0.793851
isoform_100351	0.57	0	0	0.42	0	0.84	0.19	0.42	-0.564139	0.827478
isoform_100353	2.09	1.81	3.96	0	0	0	2.62	0	4.90147	5.49245e-06
isoform_100357	3.66	0	0.76	4.35	0	5.25	1.473	3.2	-0.674089	0.793851
isoform_100360	0	0.15	0	0	0	0	0.05	0	0.45071	0.793851
isoform_100361	0	0	0	0.24	0	0	0	0.08	-0.658417	0.793851
isoform_100362	0	0.39	0.11	0.38	0	0	0.166	0.126	0.0990413	0.992059
isoform_100363	1.12	0	0	0.46	1.69	1.52	0.373	1.223	-1.0647	0.750386
isoform_100365	0	0	1.88	0	1.8	0	0.626	0.6	-0.0193164	0.995877
isoform_100366	18.16	39.29	15.73	13.46	0	13.78	24.393	9.08	0.759027	0.793851
isoform_100368	1.05	0.35	0.42	0.52	0.56	0.68	0.606	0.586	0.00107033	0.999424
isoform_100369	4.05	4.57	4.91	3.18	2.65	3.39	4.51	3.073	0.393019	0.671202
isoform_10037	18.27	19.7	15.31	12.8	18.35	14.2	17.76	15.116	0.0880365	0.850045
isoform_100370	0	0	0.65	0	0	0.71	0.216	0.236	-0.072384	0.995877
isoform_100371	1.9	1.13	0.41	2.28	0	4.11	1.146	2.13	-0.73169	0.793851
isoform_100372	0	0	0	0.38	0	0	0	0.126	-0.747003	0.793851
isoform_100374	5.7	8.25	4.6	5.16	6.25	6.42	6.183	5.943	-0.0877751	0.931312
isoform_100375	0.1	1.5	1.46	0	0	0.57	1.02	0.19	1.02846	0.764138
isoform_100376	0.1	0	0	0	0	1.76	0.033	0.586	-1.08256	0.722992
isoform_100377	17.35	0	2.55	1.16	18.82	0	6.633	6.66	-0.0355731	0.995877
isoform_10038	14.61	16.23	18.39	11.48	14.87	20.03	16.41	15.46	-0.052169	0.938265
isoform_100381	0	0	0	0	0.43	0	0	0.143	-0.797817	0.786123
isoform_100382	33.94	22.07	12.03	5.16	10.86	3.99	22.68	6.67	1.53095	0.0301371
isoform_100384	0	1.13	0	1.89	3.49	2.76	0.376	2.713	-2.10556	0.194786
isoform_100388	14.14	7.43	11.9	21.7	43.65	64.81	11.156	43.386	-2.00781	4.89082e-05
isoform_100389	2.47	1.88	1.96	1.87	1.1	2.39	2.103	1.786	0.0788508	0.96733
isoform_10039	0.61	3.51	4.7	3.11	3.71	9.06	2.94	5.293	-0.882414	0.612285
isoform_100390	0	0	0	1.71	0	0	0	0.57	-1.07989	0.72389
isoform_100391	3.64	0	0.31	0	0.55	0	1.316	0.183	1.05779	0.752262
isoform_100393	2.77	0	2.2	7.99	14.21	0	1.656	7.4	-1.26592	0.692915
isoform_100394	0	0	0	1.55	0	0	0	0.516	-1.06865	0.725877
isoform_100395	0	0	0	0.15	0	0	0	0.05	-0.491608	0.793851
isoform_100398	0	0	0	0	0.56	0	0	0.186	-0.846408	0.774669
isoform_100399	0	0	0	0	0.11	0	0	0.036	-0.474775	0.793851
isoform_1004	0.03	0.03	0.03	0	0.02	0.03	0.03	0.016	0.630144	0.793851
isoform_10040	5.9	4.58	5.16	4.77	4.67	5.29	5.213	4.91	-0.0607468	0.906266
isoform_100400	0	0	0	0	1.18	0	0	0.393	-1.0063	0.734472
isoform_100401	0	0	0	0.79	12.88	8.06	0	7.243	-5.20049	2.97912e-06
isoform_100402	0	0	0.11	0	0	0	0.036	0	0.449952	0.793851
isoform_100403	2.3	0	5.29	3.72	1.65	1.96	2.53	2.443	-0.0721585	0.995877
isoform_100405	0	0.2	0	0	0	0	0.066	0	0.45071	0.793851
isoform_100407	4.61	0	0	6.51	1.86	1.59	1.536	3.32	-0.684693	0.793851
isoform_100408	0.63	0	0.69	0	0	0.49	0.44	0.163	0.6184	0.803204
isoform_100409	8.64	3.99	1.54	0	0.13	0.24	4.723	0.123	4.04955	7.2774e-05
isoform_10041	0	0.69	0	0	0	2.98	0.23	0.993	-0.575495	0.794178
isoform_100413	0	0	0	0.38	0	0	0	0.126	-0.747003	0.793851
isoform_100415	0.27	0.11	0.12	0.24	0.23	0.24	0.166	0.236	-0.495538	0.831561
isoform_100416	0	0.85	1.05	0.33	0	0	0.633	0.11	1.02356	0.76784
isoform_10042	4.26	5.43	5.43	3.94	4.28	5.39	5.04	4.536	0.00506453	0.995877
isoform_100421	22.59	40.29	26.26	80.75	78.97	62.53	29.713	74.083	-1.46068	2.06839e-06
isoform_100422	6.8	3.86	14.16	8.39	2.09	0	8.273	3.493	0.723734	0.793851
isoform_100425	0	0	0	0.49	0.68	0	0	0.39	-2.01997	0.299717
isoform_100426	0.28	0.14	0.27	0	0.13	0	0.23	0.043	1.20497	0.720565
isoform_100427	0.16	0	0	0	0	0	0.053	0	0.454616	0.793851
isoform_10043	4.32	6.56	2.59	5.37	2.77	7.68	4.49	5.273	-0.366559	0.793851
isoform_100430	0.88	1.05	0.61	2.46	3.79	0	0.846	2.083	-1.05987	0.730099
isoform_100431	1.68	1.49	1.48	1.21	0.3	0.93	1.55	0.813	0.728916	0.734472
isoform_100433	0	0	0	0	0.91	9.87	0	3.593	-2.73372	0.0863292
isoform_100436	0	0	0	0.1	0	0	0	0.033	-0.491608	0.793851
isoform_100437	0	0	1.56	0	0	0	0.52	0	1.02157	0.733439
isoform_100438	0	1.08	0	0	0	0	0.36	0	0.959382	0.746732
isoform_100440	7.12	3.6	8.78	5.53	7.85	6.71	6.5	6.696	-0.180537	0.868729
isoform_100441	0.64	0.75	1.38	0.1	0	0.41	0.923	0.17	1.74834	0.280158
isoform_100442	0	0	0	0	0	0.2	0	0.066	-0.640986	0.793851
isoform_100443	0	0	0	0.66	0	0	0	0.22	-0.895977	0.764138
isoform_100444	3.21	3.36	10.34	0.94	0	4.21	5.636	1.716	1.14212	0.693079
isoform_100445	3.79	3.99	6.01	0.88	4.04	2.49	4.596	2.47	0.705346	0.676767
isoform_100446	0	0	0.2	0	0	0	0.066	0	0.449952	0.793851
isoform_100447	3.54	0	0	3.41	2.77	1.7	1.18	2.626	-0.719188	0.793851
isoform_100449	842.25	361.07	644.14	7.76	8.54	60.56	615.82	25.62	3.69892	9.91578e-05
isoform_100451	47.32	47.8	58.16	14.78	22.29	31.61	51.093	22.893	1.0027	0.00363205
isoform_100452	0.22	0	0.43	0.18	0	0	0.216	0.06	0.758279	0.793851
isoform_100453	0	0	0	0	2.88	0	0	0.96	-1.1667	0.687109
isoform_100454	8.05	19.93	18.61	23.63	16.12	24.75	15.53	21.5	-0.614962	0.484776
isoform_100455	125.59	26.94	90.01	8.7	1.56	10.83	80.846	7.03	2.98837	0.000197438
isoform_100456	0.09	0.11	0.11	0.41	0.27	0.5	0.103	0.393	-1.65917	0.401034
isoform_100457	0.08	0.26	0.13	0.64	0.25	0	0.156	0.296	-0.85593	0.793851
isoform_100458	8.45	10.07	5.31	10.26	15.98	19.1	7.943	15.113	-1.04572	0.0312933
isoform_100459	0	0	0	0	0	0.22	0	0.073	-0.640986	0.793851
isoform_10046	0.03	0	0	0.03	0.03	0	0.01	0.02	-0.433316	0.880983
isoform_100460	0.3	1.13	1.19	1.96	0.72	0	0.873	0.893	-0.224135	0.945233
isoform_100461	1.71	2.57	2.6	2.64	0	2.18	2.293	1.606	0.243007	0.935184
isoform_100462	7.4	0	8.38	5.55	1.66	0.54	5.26	2.583	0.540492	0.828064
isoform_100463	242.3	208.1	482.89	224.7	178.01	105.96	311.096	169.556	0.673327	0.446508
isoform_100465	0	0.1	0.07	0.2	0	0.2	0.056	0.133	-1.4979	0.553518
isoform_100466	5.99	9.29	7.63	1.01	0	1.06	7.636	0.69	2.92334	0.000975984
isoform_100467	0.23	0	0.65	0	0	0.31	0.293	0.103	0.583215	0.818296
isoform_100468	0	0	0	0	0	0.2	0	0.066	-0.471476	0.793851
isoform_100469	2.92	2.82	4.78	2.25	2.85	1.23	3.506	2.11	0.559654	0.74411
isoform_10047	11.73	7.34	14.26	9.35	8.38	3.6	11.11	7.11	0.456359	0.735885
isoform_100471	0	0	0	0.48	0	0	0	0.16	-0.747003	0.793851
isoform_100476	6.91	6.27	6.8	1.14	2.63	3.71	6.66	2.493	1.23828	0.045828
isoform_100477	0.97	0	0	0	0	0	0.323	0	0.941023	0.750386
isoform_100478	14.05	8.91	13.45	0	0	4.95	12.136	1.65	1.6885	0.444606
isoform_10048	0	0	0	0.11	0	0	0	0.036	-0.809985	0.783764
isoform_100481	0.16	0.22	0	0.17	0	0	0.126	0.056	0.589029	0.815065
isoform_100482	0.65	0	0	1.05	0.53	0	0.216	0.526	-0.728391	0.793851
isoform_100484	4.68	3.56	9.09	6.25	2.85	4.29	5.776	4.463	0.197162	0.895531
isoform_100488	42.22	42.41	64.46	20.38	33.8	28.72	49.696	27.633	0.692551	0.0731807
isoform_100489	4.04	0.46	3.95	2.62	3.61	0.48	2.816	2.236	0.147566	0.963551
isoform_10049	0.74	1.08	0.81	0.51	1.16	1.06	0.876	0.91	-0.179922	0.879916
isoform_100490	0	0.57	0.67	0	0	0	0.413	0	1.89031	0.356619
isoform_100491	2.34	0.65	1.34	2.15	1.9	1.36	1.443	1.803	-0.431899	0.793851
isoform_100493	0.83	4.33	5	2.22	0.78	1.06	3.386	1.353	0.97724	0.653399
isoform_100495	4.42	1.92	0	0	5.07	1.22	2.113	2.096	-0.0378378	0.995877
isoform_100498	1.03	0.76	1.01	0.3	0.81	0.15	0.933	0.42	1.02715	0.647098
isoform_100499	0	0	0	0.4	0	0.18	0	0.193	-1.5306	0.533616
isoform_1005	8.97	12.95	8.62	15.5	16.01	17.94	10.18	16.483	-0.838577	0.000261619
isoform_10050	7.95	5.98	9.36	6.99	7.92	8.61	7.763	7.84	-0.158586	0.793851
isoform_100500	62.4	32.95	42.25	5.74	6.61	12.91	45.866	8.42	2.24459	2.75145e-07
isoform_100502	5.54	4.8	2.79	1.73	2.74	1.43	4.376	1.966	0.986795	0.225821
isoform_100503	0.13	0.11	0.15	0.34	0	0	0.13	0.113	-0.079716	0.995877
isoform_100504	0.51	0.13	0.6	0.1	0	0.11	0.413	0.07	1.45096	0.55325
isoform_100506	4.5	4.89	3.32	10.49	9.58	4.23	4.236	8.1	-1.06087	0.143847
isoform_10051	0.35	1.44	6.1	3.26	4.42	1.42	2.63	3.033	-0.308634	0.889803
isoform_100510	0	0.64	0	0	0	0	0.213	0	0.855766	0.773636
isoform_100511	0.51	0.31	0.51	0	0	0.3	0.443	0.1	1.34687	0.616992
isoform_100512	10.35	11.23	11.92	4.62	8.38	8.77	11.166	7.256	0.478471	0.410636
isoform_100514	0	0	0	0	2.2	0	0	0.733	-1.12748	0.704383
isoform_100515	0.52	0	0	1.17	3.53	3.58	0.173	2.76	-3.2003	0.00676279
isoform_100517	3.01	3.18	4.65	1.35	1.83	2.7	3.613	1.96	0.718025	0.441896
isoform_100520	0.29	0.52	0.12	0.32	0.27	0	0.31	0.196	0.472369	0.856692
isoform_100523	221.58	111.02	58.97	9.05	33.09	33.09	130.523	25.076	2.09904	0.00284208
isoform_100525	0	0	0	1.68	0	0	0	0.56	-1.07989	0.72389
isoform_100527	25.18	22.02	21.87	0	0	13.31	23.023	4.436	0.865786	0.793851
isoform_100528	10.92	6.05	7.34	3.7	6.67	7.8	8.103	6.056	0.286228	0.793851
isoform_100529	1.93	1.99	2.23	0.68	2.22	1.07	2.05	1.323	0.500053	0.793851
isoform_10053	0	0	0	0	0	0.2	0	0.066	-0.942691	0.750386
isoform_100530	0	0	0	1.27	0	0	0	0.423	-1.01416	0.734472
isoform_100532	4.62	6.47	4.43	2.82	5.21	4.32	5.173	4.116	0.183139	0.839392
isoform_100534	0	0	0.9	0.14	0	0	0.3	0.046	0.66954	0.793851
isoform_100536	0	0	0	0	0.25	0	0	0.083	-0.64383	0.793851
isoform_100537	6.7	5.31	3.88	3.97	4.06	6.17	5.296	4.733	0.0289099	0.995877
isoform_10054	5.56	6.1	5.77	6.35	3.76	3.39	5.81	4.5	0.191441	0.799106
isoform_100540	0	1.05	0	0.45	1.06	0	0.35	0.503	-0.30189	0.92692
isoform_100542	0	0	0	0	0.13	0	0	0.043	-0.474775	0.793851
isoform_100543	1.07	0	0.41	0	0	0.64	0.493	0.213	0.448268	0.878293
isoform_100544	0.45	0.25	0.12	0.11	0	0.23	0.273	0.113	0.749939	0.793851
isoform_100545	0	0	0	0	0.11	0	0	0.036	-0.474775	0.793851
isoform_100548	0.19	0	0	0	0	0.16	0.063	0.053	-0.0101539	0.995877
isoform_10055	3.03	4.38	4.53	1.98	1.73	2.48	3.98	2.063	0.793075	0.0259271
isoform_100552	0.8	0	0	0	0	0.83	0.266	0.276	-0.0554778	0.995877
isoform_100553	1.08	2.19	0.5	7.25	7.45	4.51	1.256	6.403	-2.37724	0.00102104
isoform_100554	0.5	0	0.2	0	0	0	0.233	0	1.46056	0.571204
isoform_100555	0	0	0	0.47	0	0.31	0	0.26	-1.82316	0.387624
isoform_100556	0	0.7	0	0.55	0	0.28	0.233	0.276	-0.150675	0.974338
isoform_100557	0	0	0	0.19	0.31	0.33	0	0.276	-2.3055	0.192254
isoform_100558	0	0	0	0	0.03	0	0	0.01	NA	NA
isoform_100560	1.9	0	2.55	0	0	0.65	1.483	0.216	1.23908	0.707236
isoform_100562	0.1	0	0	0	0	0	0.033	0	0.454616	0.793851
isoform_100564	2.15	1.46	1.89	3.59	3.57	3.11	1.833	3.423	-1.04188	0.0753877
isoform_100565	0	0	1.04	0	0	0.09	0.346	0.03	0.93836	0.750386
isoform_100568	0.97	0.15	0.23	0.45	0.26	0	0.45	0.236	0.570949	0.814199
isoform_10057	1.33	0.97	1.48	1.32	1.22	1.19	1.26	1.243	-0.131402	0.877769
isoform_100572	0	0.73	0	0	0	0	0.243	0	0.855766	0.773636
isoform_100573	0.57	0.57	1.25	0.34	0.37	0	0.796	0.236	1.10969	0.680474
isoform_100574	0	0.89	0.77	3.49	0	0	0.553	1.163	-0.524812	0.842031
isoform_100576	0.48	0	0	0	0	0	0.16	0	0.771526	0.793851
isoform_100578	0.5	1.58	1.59	2.62	0.36	2.24	1.223	1.74	-0.603973	0.793851
isoform_100579	0	0	0	1.48	0	0	0	0.493	-1.05681	0.725877
isoform_10058	0.17	0.12	0.12	0.03	0.17	0.08	0.136	0.093	0.336652	0.88221
isoform_100581	0.85	0.75	1.27	0	0.11	0.24	0.956	0.116	2.40446	0.0514627
isoform_100582	35.52	38.58	30.52	28.49	21.98	18.63	34.873	23.033	0.424951	0.402108
isoform_100583	4.08	5.34	0.31	0.71	4.86	3.34	3.243	2.97	0.00516976	0.997625
isoform_100585	0	0	0.55	1.39	0	1.54	0.183	0.976	-1.11741	0.737679
isoform_100586	0	0	0	0	0	0.1	0	0.033	-0.471476	0.793851
isoform_100589	1.21	0	0	0	0	0	0.403	0	0.979629	0.740017
isoform_100590	412.83	381.99	426.83	3.35	0	38.79	407.216	14.046	2.37577	0.168038
isoform_100592	0	5.34	0	0	0	2.83	1.78	0.943	0.219777	0.942859
isoform_100593	4.81	0	0	0	0	0	1.603	0	1.18563	0.678176
isoform_100595	0.27	0	0.13	0	0	0.13	0.133	0.043	0.623861	0.7998
isoform_100597	7.72	6.07	10.99	0	0	0.72	8.26	0.24	3.94694	6.91215e-05
isoform_100598	0.75	1.58	0	0	0	0	0.776	0	2.3108	0.190964
isoform_100599	4.83	6.82	8.58	2.47	2.51	3.31	6.743	2.763	1.10605	0.0255235
isoform_1006	0.05	0.12	0.08	0	0.03	0	0.083	0.01	2.39115	0.122146
isoform_10060	0	0.03	0	0.06	0.03	0.03	0.01	0.04	-1.08948	0.749528
isoform_100600	8.85	0	1.78	0	0	1.25	3.543	0.416	1.19189	0.725254
isoform_100601	0	0	0	0	0	1.34	0	0.446	-1.03544	0.729342
isoform_100603	0	0	0.51	0	0	0	0.17	0	0.768003	0.793851
isoform_100604	0	0.56	0	0	0	0.25	0.186	0.083	0.334996	0.905305
isoform_100607	0	0	0	0.14	0	0	0	0.046	-0.491608	0.793851
isoform_100608	1.32	0.45	0.14	0.81	0.3	0.39	0.636	0.5	0.205097	0.946232
isoform_100609	7.49	0	6.74	0.72	2.88	15.33	4.743	6.31	-0.318827	0.918181
isoform_100611	1.91	1.07	2.02	0.41	0.72	0.1	1.666	0.41	1.61514	0.176823
isoform_100612	0	1.14	0	1.28	0	0.54	0.38	0.606	-0.369321	0.90571
isoform_100613	0	0	0	0	0	0.05	0	0.016	NA	NA
isoform_100614	9.7	6.23	4.69	2.56	5.41	4.26	6.873	4.076	0.598416	0.619429
isoform_100616	0.77	0.53	1.25	0.87	1.08	0.81	0.85	0.92	-0.309837	0.858493
isoform_100617	0.48	0	1	0.11	0.43	0.43	0.493	0.323	0.312804	0.916764
isoform_100618	0.56	1.37	1.01	0.67	1.33	0.81	0.98	0.936	-0.0298323	0.995877
isoform_10062	3.18	2.93	4.89	1.52	5.54	11.84	3.666	6.3	-0.818081	0.594536
isoform_100620	0	0.38	0	0	0	0	0.126	0	0.705766	0.793851
isoform_100621	23.69	18.69	28.82	3.92	5.1	8.39	23.733	5.803	1.85169	2.43511e-06
isoform_100623	5.69	1.92	2.38	7.65	2.79	5.02	3.33	5.153	-0.738905	0.680813
isoform_100624	0	0	0	1.25	0.41	1.34	0	1	-3.67438	0.00462264
isoform_100625	0	0.04	0	0	0	1.12	0.013	0.373	-0.986647	0.736514
isoform_100626	3.81	1.04	0	0.79	0	1.98	1.616	0.923	0.360572	0.909372
isoform_100627	0.21	0.74	0.88	0.43	1.63	0.94	0.61	1	-0.747016	0.763529
isoform_100628	0.28	0.12	1.67	0.11	0.43	0.5	0.69	0.346	0.657565	0.793851
isoform_100630	0.98	1.63	1.57	2.29	3.35	3.77	1.393	3.136	-1.29094	0.0385811
isoform_100632	18.43	16.98	14.53	12.09	16.64	16.84	16.646	15.19	-0.0132831	0.995877
isoform_100633	0	0	0.8	0	0	0	0.266	0	0.887481	0.764138
isoform_100634	2.22	1.5	1.07	1.78	1.2	0.87	1.596	1.283	0.125806	0.955271
isoform_100635	0.79	2.69	1.73	3.1	1.56	2.86	1.736	2.506	-0.631302	0.740017
isoform_100637	0	0	0	0	0.49	0	0	0.163	-0.797817	0.786123
isoform_100638	0.44	0.54	0.7	0.26	0.27	0.65	0.56	0.393	0.335478	0.879895
isoform_100639	0.11	0.11	0	0	0	0	0.073	0	1.03892	0.734472
isoform_10064	0.31	1.16	0	0	0	0.55	0.49	0.183	0.522881	0.843915
isoform_100640	11.6	22.58	7.04	2.92	2.48	11.06	13.74	5.486	1.06902	0.446617
isoform_100643	9.79	16.77	21.85	7.88	5.85	15.31	16.136	9.68	0.567945	0.668012
isoform_100644	0	0.97	0	0.86	0	0	0.323	0.286	0.00144706	0.999386
isoform_100646	0	0	1.49	1.52	0	3.21	0.496	1.576	-0.753275	0.793851
isoform_100647	6.16	3.47	6.95	0.83	2.79	2.09	5.526	1.903	1.31929	0.107821
isoform_100648	16.94	16.21	16.03	8.8	16.73	13.29	16.393	12.94	0.1982	0.793851
isoform_100649	0	0	0	0.59	0.46	0	0	0.35	-1.96935	0.320408
isoform_10065	1.83	2.59	2.17	3.22	3.93	4.37	2.196	3.84	-0.950149	0.000182195
isoform_100654	0.38	1.07	0	0	0	0	0.483	0	1.99638	0.308214
isoform_100655	0	0	0	0	0	0.29	0	0.096	-0.640986	0.793851
isoform_100656	3.4	2.17	1.57	0	1.22	0	2.38	0.406	1.59284	0.485474
isoform_100659	0	0.08	0	0	0	0	0.026	0	NA	NA
isoform_10066	6.78	6.43	5.84	5.11	4.43	2.94	6.35	4.16	0.443549	0.468251
isoform_100662	20.9	21.99	23.54	38.71	36.82	42.05	22.143	39.193	-0.976628	4.44005e-11
isoform_100663	26.82	21.54	26.03	14.88	25.05	17.74	24.796	19.223	0.223826	0.773636
isoform_100664	33.17	38.27	23.45	7.32	13.72	13.71	31.63	11.583	1.28754	0.000574829
isoform_100665	2.23	2.06	3.53	4.25	4.26	2.92	2.606	3.81	-0.664668	0.46818
isoform_100668	0	0	0	0.29	0	0	0	0.096	-0.658417	0.793851
isoform_100669	0	0	0	0	0	0.29	0	0.096	-0.640986	0.793851
isoform_10067	10.98	10.19	9.59	8.55	9.7	10.45	10.253	9.566	-0.0455864	0.895857
isoform_100670	2.41	0	7.4	0.2	0	1.03	3.27	0.41	1.4977	0.574344
isoform_100672	12.58	4.99	7.02	0	3.3	0	8.196	1.1	1.68045	0.448548
isoform_100674	315.05	184.77	282.06	260.48	107.72	221.02	260.626	196.406	0.231601	0.794858
isoform_100675	62	42.14	63.8	1.11	0.63	4.32	55.98	2.02	4.29857	1.37853e-11
isoform_100677	0	0	0	10.21	0	0	0	3.403	-1.35371	0.603662
isoform_100678	0	4.66	0	0.11	0	0	1.553	0.036	1.16526	0.703883
isoform_10068	0	0	0	0	3.08	0	0	1.026	-1.42475	0.569125
isoform_100680	0	0	0	0	0.12	0	0	0.04	-0.474775	0.793851
isoform_100681	0	0	0	0	0	3.66	0	1.22	-1.20108	0.674912
isoform_100682	2.3	2.16	2.43	0	1.15	0.47	2.296	0.54	1.65875	0.250991
isoform_100683	0.43	0	0	0	0	0	0.143	0	0.771526	0.793851
isoform_100685	16.37	4.78	23.94	7.34	15.01	13.5	15.03	11.95	0.171761	0.924327
isoform_100686	6.43	8.3	7.41	9.48	7.1	8.98	7.38	8.52	-0.365179	0.588189
isoform_100688	0	0	0	0	0	0.25	0	0.083	-0.640986	0.793851
isoform_100691	1.87	3.47	3.97	2.98	3.1	3.32	3.103	3.133	-0.170289	0.88278
isoform_100695	3.71	3.44	3.38	3.05	6.03	2.71	3.51	3.93	-0.291333	0.793851
isoform_100696	0	0.45	0	0.41	0	0	0.15	0.136	-0.0477532	0.995877
isoform_100698	24.78	17.65	35.76	14.29	10.83	15.76	26.063	13.626	0.761797	0.147957
isoform_100702	1.68	0	0	0	0.97	0	0.56	0.323	0.18114	0.956743
isoform_100703	0.02	0.07	0	0.1	0.11	0.02	0.03	0.076	-1.09774	0.725877
isoform_100704	8.88	0	2.69	0	11.08	1.77	3.856	4.283	-0.131777	0.982087
isoform_100707	0.96	0	0	0.67	0.6	1.21	0.32	0.826	-0.802953	0.793851
isoform_10071	0.35	0.55	0	0.54	0	0.47	0.3	0.336	-0.212281	0.95397
isoform_100711	4.33	1.16	3.56	0	0	0	3.016	0	4.79957	1.55983e-05
isoform_100714	0	0	0.16	0	0.17	0	0.053	0.056	-0.0203108	0.995877
isoform_100715	2.29	12.38	1.97	3.98	6.03	0	5.546	3.336	0.378047	0.893529
isoform_100716	0	0	0	1.07	7.04	0	0	2.703	-2.8029	0.0746747
isoform_100720	0	0	0	0.21	0	0.42	0	0.21	-1.7057	0.445375
isoform_100721	3.41	3.17	2.14	5.44	8.15	3.83	2.906	5.806	-1.12379	0.0823069
isoform_100727	0	0.57	0	6.69	6.07	5.78	0.19	6.18	-4.48829	2.67927e-08
isoform_100728	1.1	1.43	0.62	1.9	0	1.45	1.05	1.116	-0.202102	0.949882
isoform_100729	9.14	7.15	11.67	4.7	11.78	7.08	9.32	7.853	0.110918	0.932509
isoform_10073	0.61	1.36	1.66	0.84	0.75	0.76	1.21	0.783	0.459491	0.753921
isoform_100730	0	0	0	4.39	0	0	0	1.463	-1.22316	0.665648
isoform_100731	0.11	0	0	0	0	0	0.036	0	0.454616	0.793851
isoform_100732	0	0.22	0	0.51	0.62	0.31	0.073	0.48	-1.93323	0.274348
isoform_100735	0	0.12	0	0	0	0	0.04	0	0.45071	0.793851
isoform_100736	4.14	2.59	0	3.34	3.15	5.85	2.243	4.113	-0.742173	0.793851
isoform_100737	1.16	1.35	0.22	0	3.52	5.85	0.91	3.123	-1.29886	0.643464
isoform_100738	2.63	0	2.24	13.89	1.99	0	1.623	5.293	-1.00368	0.774669
isoform_100739	0	3.4	3.35	0	4.06	1.53	2.25	1.863	0.0924881	0.994802
isoform_10074	0.69	0.23	0.41	0.23	0.69	0.46	0.443	0.46	-0.161726	0.937668
isoform_100740	0.64	0.31	0.62	1.13	0.41	0.71	0.523	0.75	-0.655576	0.786123
isoform_100742	9.08	9.43	10.41	6.01	5.95	6.39	9.64	6.116	0.499414	0.14954
isoform_100744	0	5.01	13.19	3.06	6	0	6.066	3.02	0.449229	0.87973
isoform_100745	0.11	0	0.11	0	0	0	0.073	0	1.03851	0.734472
isoform_100748	6.05	16.88	7.93	21.05	54.04	3.59	10.286	26.226	-1.30045	0.367534
isoform_10075	0	0	0.03	0	0	0	0.01	0	0.449952	0.793851
isoform_100750	1.27	0.92	0.71	0	1.2	0.45	0.966	0.55	0.511217	0.816178
isoform_100751	11.4	10.04	8.31	11.06	11.16	16.07	9.916	12.763	-0.506115	0.268299
isoform_100755	9.3	9.84	6.97	6.88	6.91	10.88	8.703	8.223	-0.0550136	0.959739
isoform_100757	4.55	3.83	8.53	9.08	7.4	8.46	5.636	8.313	-0.704171	0.358432
isoform_100758	2.5	1.02	1.29	3.2	3.49	3.51	1.603	3.4	-1.18696	0.096626
isoform_10076	0	0.04	0.04	0	0	0	0.026	0	1.03638	0.734472
isoform_100761	0	0	0	0	0.48	0.59	0	0.356	-1.96976	0.320431
isoform_100763	0	2.91	0.02	0	0	0	0.976	0	1.13401	0.701601
isoform_100764	0	0.45	0	0.36	0	0	0.15	0.12	0.0615942	0.995877
isoform_100765	0.65	0.95	0.61	0.58	2.06	1.25	0.736	1.296	-0.881943	0.644363
isoform_100767	3.76	4.84	5.33	2.83	3.52	2.79	4.643	3.046	0.43607	0.627091
isoform_100768	0	0.11	0	0	0	0	0.036	0	0.45071	0.793851
isoform_100769	25.09	25.07	40.49	16.03	22.8	29.57	30.216	22.8	0.259531	0.793851
isoform_10077	1.36	2.19	1.7	2.6	2.22	2.27	1.75	2.363	-0.591959	0.206422
isoform_100771	35.36	35.72	32	36.21	34.19	47.39	34.36	39.263	-0.341595	0.252951
isoform_100774	10.2	17.92	24.22	61.81	53.99	34.88	17.446	50.226	-1.64359	0.000385761
isoform_100775	0	0	0	2.01	0	0	0	0.67	-1.09016	0.719891
isoform_100776	15.7	12.41	15.5	8.07	7.06	10.81	14.536	8.646	0.588497	0.166616
isoform_100779	0.98	0.97	1.57	0.23	0.1	0	1.173	0.11	3.07092	0.0148325
isoform_10078	0	0.07	0	0.01	0	0	0.023	0.003	0.616677	0.793851
isoform_100782	0	0	0	0	0	3.48	0	1.16	-1.19649	0.674912
isoform_100783	17.43	12.53	16.71	17.87	15.43	12.93	15.556	15.41	-0.144713	0.816178
isoform_100784	4.05	6.22	2.43	3.3	3.11	3.2	4.233	3.203	0.22398	0.846624
isoform_100785	7.72	4.23	0	0.99	1.47	0.79	3.983	1.083	1.24773	0.65434
isoform_100787	0	0	0	0	0	0.35	0	0.116	-0.731664	0.793851
isoform_100788	0	0	0.16	0	0.12	0.41	0.053	0.176	-0.852941	0.793851
isoform_10079	0	0.07	0	0.06	0.06	0	0.023	0.04	-0.488151	0.863441
isoform_100791	2.3	0	0	0	0	1.1	0.766	0.366	0.255073	0.932651
isoform_100792	11.07	9.3	16.06	2.86	0	0	12.143	0.953	2.1231	0.226948
isoform_100794	0	0.69	0.86	0	0.9	0.59	0.516	0.496	0.0241621	0.995877
isoform_100795	0.46	0	0.45	0.42	0.12	1.04	0.303	0.526	-0.673125	0.793851
isoform_100796	0.43	0.86	1.18	0.61	0.41	1.23	0.823	0.75	-0.0216642	0.995877
isoform_100797	0	1.64	1.26	1.35	0	0	0.966	0.45	0.302699	0.926601
isoform_100799	0	0	0	0	1.11	0	0	0.37	-0.988294	0.736392
isoform_100801	4.53	6.71	9.72	2.02	1.41	2.64	6.986	2.023	1.57037	0.00828065
isoform_100802	0.67	0.23	0	0.8	0.54	0.61	0.3	0.65	-0.886195	0.767784
isoform_100803	0	0	0	0.3	0	0.34	0	0.213	-1.61912	0.489353
isoform_100807	30.78	20.96	28.9	24.22	44.17	50.73	26.88	39.706	-0.682566	0.157788
isoform_100808	869.59	518.76	684.05	57.66	37.23	122.68	690.8	72.523	2.98215	1.87392e-10
isoform_10081	0.15	0.26	0.4	0.34	0	0.14	0.27	0.16	0.472177	0.843379
isoform_100810	0	0	1.78	0	0.64	0.97	0.593	0.536	0.0129026	0.995877
isoform_100813	209.87	208.84	128.27	0.71	6.23	16.55	182.326	7.83	3.86371	1.99821e-06
isoform_100814	0	2.05	2.04	7.64	4.91	3.97	1.363	5.506	-1.72969	0.255428
isoform_100816	1.96	3.17	2.03	2.82	4.29	4.96	2.386	4.023	-0.893854	0.168223
isoform_100817	0	0.22	0.07	0.31	0.42	0.9	0.096	0.543	-1.96445	0.265167
isoform_100818	0	0	0	0	0.34	0	0	0.113	-0.734223	0.793851
isoform_100819	0	0	0	0	0	0.12	0	0.04	-0.471476	0.793851
isoform_10082	4.17	8.8	6.5	4.76	5.67	4.93	6.49	5.12	0.185315	0.793851
isoform_100821	3.28	0	0	0	0	1.16	1.093	0.386	0.379228	0.885215
isoform_100825	2.39	0	0	0	0	0	0.796	0	1.06771	0.725877
isoform_100826	0	0	0	0.69	0	0	0	0.23	-0.895977	0.764138
isoform_100827	0.28	0	1.1	0	0	0	0.46	0	1.86289	0.367166
isoform_100828	0.89	2.21	3.9	2.14	1.46	2.88	2.333	2.16	-0.048382	0.995877
isoform_100829	0	0	0	0	0	0.02	0	0.006	NA	NA
isoform_10083	11.37	10.93	11.38	10.49	11.61	12.59	11.226	11.563	-0.188207	0.31669
isoform_100830	0.27	0	0	0	0	0.45	0.09	0.15	-0.271204	0.92737
isoform_100831	0	2.19	1.6	0	0	0	1.263	0	2.60183	0.112825
isoform_100832	0.21	0.11	0.21	0.2	0.61	0.2	0.176	0.336	-0.825509	0.783764
isoform_100838	0	0	4.36	6.14	7.32	6.26	1.453	6.573	-1.39212	0.619477
isoform_100839	4.13	3.94	5	2.58	2.43	1.33	4.356	2.113	0.873469	0.211905
isoform_10084	1.79	4.84	2.39	2.68	4.05	3.95	3.006	3.56	-0.375517	0.783764
isoform_100840	0	0	0.5	1.52	0	0.52	0.166	0.68	-1.01699	0.769896
isoform_100841	7.4	7.59	7.82	5.22	5.76	6.48	7.603	5.82	0.243575	0.736392
isoform_100842	0	0.13	0	0	0.12	0	0.043	0.04	-0.0193316	0.995877
isoform_100843	0.07	0.27	0.24	0.32	0.13	0.06	0.193	0.17	-0.079797	0.995877
isoform_100844	0.69	0	1.09	0	0	0.67	0.593	0.223	0.582466	0.818335
isoform_100845	1.23	0.79	1.01	0.73	0.36	0.49	1.01	0.526	0.690375	0.756427
isoform_100847	0	0	0.16	0.31	1.07	0	0.053	0.46	-1.49204	0.580043
isoform_100848	104.91	76.55	116.93	0.44	0.8	10.06	99.463	3.766	3.44403	0.00287584
isoform_100849	0.53	0	0	0	0	0.81	0.176	0.27	-0.217923	0.943772
isoform_10085	0.48	0.5	0.75	0.94	0.8	0.21	0.576	0.65	-0.309718	0.851203
isoform_100850	4.89	3.29	5.56	0	4.28	5.67	4.58	3.316	0.264574	0.927738
isoform_100851	2.19	2.45	3.48	1.34	1.52	2.65	2.706	1.836	0.405366	0.793851
isoform_100852	0	0	0	0	0	0.12	0	0.04	-0.471476	0.793851
isoform_100853	5.49	3.83	1.47	3.13	1.78	0.72	3.596	1.876	0.661716	0.778431
isoform_100854	1.55	1.35	3.18	0	1.65	2.96	2.026	1.536	0.224119	0.941492
isoform_100855	0.11	0.53	0	0.31	0.81	0	0.213	0.373	-0.604538	0.809764
isoform_100856	0.32	0.43	0	0.53	2.43	0.48	0.25	1.146	-1.97501	0.222766
isoform_100857	0.55	18.74	0.55	339.36	1.82	0.13	6.613	113.77	-1.60369	0.506806
isoform_100858	1.26	0.28	0.37	0.62	0.94	0.58	0.636	0.713	-0.276	0.907955
isoform_100859	0	0	0	0.16	0	0	0	0.053	-0.491608	0.793851
isoform_10086	0.84	0.63	0.43	2.8	2.59	2.3	0.633	2.563	-2.11029	3.21147e-08
isoform_100860	67.39	81.09	71.33	44.86	45.59	43.02	73.27	44.49	0.56172	0.000211937
isoform_100861	0	0	1.18	1.16	1.55	0	0.393	0.903	-0.537454	0.838589
isoform_100862	10.43	21.84	23.84	14.26	10.49	10.52	18.703	11.756	0.4906	0.635247
isoform_100863	0	0	0.28	0	0	0	0.093	0	0.615974	0.793851
isoform_100864	0	0	0	0	5.77	1.27	0	2.346	-2.75376	0.0827695
isoform_100866	2.02	3.17	0.05	2.97	5.94	4.08	1.746	4.33	-1.13284	0.659835
isoform_100868	3.41	4.73	8.14	2.58	3.65	4.42	5.426	3.55	0.457399	0.746732
isoform_100869	4.37	0	0	18.82	5.01	0.12	1.456	7.983	-0.856681	0.793851
isoform_10087	5.58	9.13	5.76	14.71	21.53	12.92	6.823	16.386	-1.39063	4.0891e-05
isoform_100870	0	0	0	0.12	0.46	0	0	0.193	-1.52411	0.537183
isoform_100871	0	0.11	0	0.3	0	0	0.036	0.1	-0.456337	0.854292
isoform_100872	1.61	2.74	2.59	1.81	2.52	2.47	2.313	2.266	-0.109208	0.936985
isoform_100873	0.66	0.65	1.23	0.97	1.18	0.64	0.846	0.93	-0.248349	0.889679
isoform_100874	0.69	5.04	3.21	1.11	1.93	4.42	2.98	2.486	0.116327	0.971095
isoform_100875	1.8	10.55	9.5	10.69	9.08	7.8	7.283	9.19	-0.470362	0.793851
isoform_100876	9.3	7.06	13.39	4.17	3.06	0.02	9.916	2.416	1.43847	0.458023
isoform_100879	0	0.11	0	0	0	0	0.036	0	0.45071	0.793851
isoform_10088	14.85	15.23	17.03	10.52	13.82	12.77	15.703	12.37	0.197612	0.459749
isoform_100880	0	0	0.42	0	0.43	1.86	0.14	0.763	-1.16408	0.728712
isoform_100882	0	0	0	0	0	0.21	0	0.07	-0.640986	0.793851
isoform_100884	1.37	2.06	3.26	1.9	1.28	1.7	2.23	1.626	0.261291	0.851715
isoform_100885	16.78	13.83	10.52	45.29	36.85	45.84	13.71	42.66	-1.77511	7.13367e-11
isoform_100887	0	0.13	0	0	0	0	0.043	0	0.45071	0.793851
isoform_100888	2.37	4.89	5.21	6.6	3.53	4.75	4.156	4.96	-0.415885	0.793851
isoform_100889	0.13	0	0	0.22	0.11	0.12	0.043	0.15	-1.08407	0.750386
isoform_10089	2.09	2.47	2.51	1.95	3.46	1.08	2.356	2.163	-0.0301063	0.995877
isoform_100890	0	0.67	0	0	0	0	0.223	0	0.855766	0.773636
isoform_100893	0	0	0	0	0	0.21	0	0.07	-0.640986	0.793851
isoform_100894	0	0	1.74	0.54	0	0	0.58	0.18	0.360676	0.893483
isoform_100895	0	0	0	0	0.53	0	0	0.176	-0.846408	0.774669
isoform_100898	3.04	0	0	0	4.98	0	1.013	1.66	-0.205136	0.94767
isoform_100899	12.83	10.58	11.43	5.11	7.14	5.79	11.613	6.013	0.801333	0.0313704
isoform_1009	0.32	0.19	0.37	0.37	0.4	0.58	0.293	0.45	-0.720662	0.484383
isoform_10090	1.87	1.81	1.82	1.31	1.58	1.35	1.833	1.413	0.227323	0.764138
isoform_100900	0	1.31	2.56	0	0.01	2.07	1.29	0.693	0.308791	0.924935
isoform_100901	1.52	2.84	0.86	2.36	2.44	4.14	1.74	2.98	-0.890284	0.51922
isoform_100904	6.22	4.16	6.02	0.71	1.02	0.41	5.466	0.713	2.62882	3.36289e-06
isoform_100909	1.39	0.18	0	2.19	1.6	1.71	0.523	1.833	-1.49142	0.485974
isoform_100910	159.15	121.27	168.43	36.02	31.98	38.62	149.616	35.54	1.90526	1.51082e-21
isoform_100911	0	0	0	0.2	0	0	0	0.066	-0.491608	0.793851
isoform_100913	19.2	20.37	20.22	6.91	10.45	12.56	19.93	9.973	0.850722	0.00353043
isoform_100915	0	0.84	1.29	0	1.36	0	0.71	0.453	0.192552	0.959776
isoform_100916	0.36	4.01	3.23	0	0	1.22	2.533	0.406	1.48548	0.572985
isoform_100917	0.26	0	0.55	0.5	0.26	0.23	0.27	0.33	-0.37178	0.893104
isoform_100919	0	0	0	0.15	0	0	0	0.05	-0.491608	0.793851
isoform_10092	2.79	2.11	2.62	2.17	2.41	2.4	2.506	2.326	-0.041087	0.957355
isoform_100920	0	2.63	1.03	1.26	0	0.12	1.22	0.46	0.587417	0.818547
isoform_100922	1.44	2.26	3.91	1.89	0	2.27	2.536	1.386	0.504616	0.823039
isoform_100924	1.24	3.74	0	0	0	0	1.66	0	2.62256	0.108372
isoform_100925	0	1.08	2.13	0.91	0	0.88	1.07	0.596	0.442826	0.880004
isoform_100926	1.49	1.51	1.6	0.73	1.66	1.34	1.533	1.243	0.162582	0.918156
isoform_100927	0	0.11	0	0	0	0	0.036	0	0.45071	0.793851
isoform_100928	0	0	0	0	0.12	0	0	0.04	-0.474775	0.793851
isoform_100929	4.65	2.32	5.17	1.31	4.67	1.78	4.046	2.586	0.492415	0.793851
isoform_10093	20.86	21.85	16.91	19.3	24.05	24.33	19.873	22.56	-0.325301	0.17552
isoform_100930	0	0.17	0	0	0	0	0.056	0	0.45071	0.793851
isoform_100931	0	0.13	0	0	0	0.47	0.043	0.156	-0.731664	0.793851
isoform_100932	3.16	2.25	3.22	3.05	3.82	0.74	2.876	2.536	0.0248077	0.995877
isoform_100933	0	0	1.99	0.02	0	0	0.663	0.006	1.06585	0.725877
isoform_100936	0	0	0.09	0.5	0	0	0.03	0.166	-0.809985	0.783764
isoform_100937	1.26	2.97	0	7.29	4.98	2.31	1.41	4.86	-1.51742	0.43002
isoform_100938	0.79	0.26	1.17	0.51	0.47	0.25	0.74	0.41	0.558974	0.793851
isoform_10094	16.77	15.09	12.66	9.37	14.53	11.29	14.84	11.73	0.196824	0.764705
isoform_100941	4.68	2.77	2.85	1.14	2.31	0.9	3.433	1.45	1.043	0.310012
isoform_100942	0	0.12	4.43	0.02	0.18	0	1.516	0.066	1.8289	0.387242
isoform_100943	0	0	0.11	0.51	1.25	1.65	0.036	1.136	-3.41024	0.00464077
isoform_100945	1.69	2.92	2.82	2.13	1.95	1.63	2.476	1.903	0.19181	0.874758
isoform_100946	20.63	15.11	16.07	18.81	19.53	22.89	17.27	20.41	-0.390942	0.347003
isoform_100949	1.81	0.97	1.06	0.81	0.74	1.79	1.28	1.113	0.0815675	0.979022
isoform_10095	5.59	8.85	8.97	3.58	4.07	3.98	7.803	3.876	0.851708	0.00307977
isoform_100950	1.06	0	0	0.99	0	0.08	0.353	0.356	-0.0416578	0.995877
isoform_100952	7.95	4.19	8.35	7.88	12.77	11.37	6.83	10.673	-0.765013	0.212303
isoform_100953	1.32	1.12	0.62	0.98	0.54	0.71	1.02	0.743	0.29563	0.870436
isoform_100955	1.17	0.43	0.64	0	0.1	0.72	0.746	0.273	0.951339	0.763746
isoform_100956	0	0.09	0	0	0	0	0.03	0	NA	NA
isoform_100958	19.05	18.86	30.77	0.61	3.03	2.27	22.893	1.97	3.2377	2.62113e-09
isoform_10096	9.55	11.04	9.1	8.06	7.85	9.06	9.896	8.323	0.098815	0.793851
isoform_100960	0	0	0	0	0	0.11	0	0.036	-0.471476	0.793851
isoform_100962	0	4.39	0	2.57	17.7	11.13	1.463	10.466	-1.73956	0.425961
isoform_100965	12.77	5.35	6.24	5.82	4.77	4.37	8.12	4.986	0.537944	0.691136
isoform_100966	1.03	1.05	1.19	1.25	0.48	0.44	1.09	0.723	0.375435	0.838244
isoform_100967	0	0	25.1	38.33	24.72	52.92	8.366	38.656	-0.82538	0.793851
isoform_100968	7.37	6.22	6.31	6.68	12.17	2.63	6.633	7.16	-0.244359	0.871138
isoform_100969	0.11	0.24	0	0	0	0	0.116	0	1.24115	0.674912
isoform_10097	0.04	0.04	0.15	0.04	0.04	0.15	0.076	0.076	-0.0534276	0.995877
isoform_100970	246.43	244.51	314.21	729.71	765.84	599.15	268.383	698.233	-1.52822	3.179e-15
isoform_100971	144.1	159.36	75.59	1.42	9.01	15.84	126.35	8.756	3.37895	2.84664e-06
isoform_100972	0	0.75	1.94	0	0	0	0.896	0	2.3239	0.186589
isoform_100975	0	5.89	0	0	0	0	1.963	0	1.24371	0.655386
isoform_100976	0	0	0.12	0	0	0	0.04	0	0.449952	0.793851
isoform_100978	0	0	0	0.1	0	0	0	0.033	-0.491608	0.793851
isoform_100979	2.46	2.57	3.58	3.05	7.95	3.14	2.87	4.713	-0.815601	0.485756
isoform_10098	0	3.43	1.91	4.51	8.58	1.67	1.78	4.92	-0.962388	0.783764
isoform_100980	1.19	4.48	2.71	1.02	0.51	2.83	2.793	1.453	0.734463	0.766574
isoform_100981	1.13	0.59	1.11	0.79	0	0	0.943	0.263	0.947965	0.783764
isoform_100982	1.04	0.98	3.37	0.82	2.41	2.27	1.796	1.833	-0.168113	0.940453
isoform_100983	0	0	0	0.62	0	0.06	0	0.226	-0.857766	0.773636
isoform_100984	0	0	0.29	0.25	0	0	0.096	0.083	-0.047544	0.995877
isoform_100985	3.27	1.55	0.04	3.71	2.75	2.17	1.62	2.876	-0.758147	0.793851
isoform_100986	0	0	0	0.16	0	0	0	0.053	-0.491608	0.793851
isoform_100987	0	0	0	1.05	0	0	0	0.35	-1.01416	0.734472
isoform_100988	4.34	3.38	5.34	3.86	7.99	3.71	4.353	5.186	-0.391349	0.793851
isoform_10099	26.07	14.76	10.5	11.6	11.77	14.36	17.11	12.576	0.295137	0.793851
isoform_100991	2.58	3.73	10.25	0	0	0.26	5.52	0.086	4.61218	3.29544e-06
isoform_100992	0.2	0.51	0	0.31	0.57	0.35	0.236	0.41	-0.87863	0.783764
isoform_100994	0	0.21	0	0	0.42	0	0.07	0.14	-0.537926	0.813989
isoform_100996	0	0	0	0.1	0	0	0	0.033	-0.491608	0.793851
isoform_100998	1.29	4.07	3.03	0.65	0.23	2.48	2.796	1.12	0.995755	0.676099
isoform_100999	0	0	0	0	2.86	1.06	0	1.306	-2.58804	0.115948
isoform_101	12.24	11.96	12.73	14.03	17.69	14.89	12.31	15.536	-0.480844	0.000357247
isoform_10100	0	0	0	0.06	0	0.13	0	0.063	-1.77165	0.412434
isoform_101000	1.83	0	0	0	0.77	0	0.61	0.256	0.320499	0.908898
isoform_101001	0	0	0.05	0	0.12	0.37	0.016	0.163	-1.42765	0.586986
isoform_101002	11.72	10.77	10.38	2.31	5.61	5.86	10.956	4.593	1.0934	0.0288134
isoform_101003	0	0.26	0.14	0.91	0.28	2.77	0.133	1.32	-2.46453	0.0956585
isoform_101004	5.83	1.72	7.17	0	0	0.6	4.906	0.2	3.44965	0.00291937
isoform_101005	0.29	0.27	0.34	0	0.33	0	0.3	0.11	0.690482	0.793851
isoform_101006	0.87	0.51	0.74	0.18	0.69	0.28	0.706	0.383	0.751909	0.784098
isoform_101008	0	0	0.19	0	0	0	0.063	0	0.449952	0.793851
isoform_101009	0.57	0	0	0.1	0.02	1.86	0.19	0.66	-0.732599	0.793851
isoform_10101	10.7	11.38	11.42	13	11.62	17.17	11.166	13.93	-0.464643	0.0734782
isoform_101014	0	0	0	0.75	2.37	0	0	1.04	-2.48438	0.140849
isoform_101015	1.31	0.67	1.39	0	0.83	0.51	1.123	0.446	1.00305	0.720565
isoform_101016	3.34	0	0.04	2.16	1.08	0.01	1.126	1.083	-0.0477019	0.995877
isoform_101017	3.92	0.16	9.02	2.92	7.35	1.71	4.366	3.993	-0.0232817	0.995877
isoform_101018	4.3	5.45	3.25	1.13	3.37	3.46	4.333	2.653	0.552135	0.725877
isoform_101020	48.81	41.66	46.66	24.73	26.74	21.16	45.71	24.21	0.759527	0.000189128
isoform_101021	0	4.69	0	0.57	0.02	0	1.563	0.196	0.733384	0.793851
isoform_101022	13.68	0	13.24	10.04	2.78	8.7	8.973	7.173	0.114318	0.984528
isoform_101023	9.89	9.21	11.22	4.64	7.08	8.33	10.106	6.683	0.448641	0.452359
isoform_101024	1.45	0.73	0	0	0	0.62	0.726	0.206	0.687371	0.793851
isoform_101025	0.24	0.12	0.12	0	0.11	0.36	0.16	0.156	-0.038124	0.995877
isoform_101026	26.73	18.71	25.39	30.07	29.79	29.04	23.61	29.633	-0.478637	0.121817
isoform_101027	15.3	9.65	10.09	2.02	4.27	2.89	11.68	3.06	1.74784	0.000111987
isoform_101028	0	0	0.31	5.93	0	0	0.103	1.976	-1.1125	0.725877
isoform_10103	0	0	0	0	0	0.09	0	0.03	-0.731664	0.793851
isoform_101030	0	0	0.44	0	0	0	0.146	0	0.768003	0.793851
isoform_101031	1.85	1.11	1.37	0.7	1.08	0.65	1.443	0.81	0.711009	0.679221
isoform_101032	0	0	0.22	0	0	0.11	0.073	0.036	-0.016198	0.995877
isoform_101034	0	2.14	0	0.02	0	0	0.713	0.006	1.04553	0.725877
isoform_101036	3.44	4.26	4.23	1.54	2.36	3.01	3.976	2.303	0.611422	0.476662
isoform_101037	1.29	2.28	2.47	1.44	2.91	3.1	2.013	2.483	-0.419006	0.793851
isoform_101038	521.65	346.79	399.12	127.15	127.78	123.13	422.52	126.02	1.5784	1.62643e-13
isoform_101039	0	0	0.23	0	0	0	0.076	0	0.615974	0.793851
isoform_10104	3.96	3.52	3.49	1.54	6.49	4.52	3.656	4.183	-0.298436	0.793851
isoform_101040	6.06	5.98	10.45	1.79	1.62	1.81	7.496	1.74	1.93371	4.87088e-05
isoform_101042	0	0	0	1.56	0	0	0	0.52	-1.05681	0.725877
isoform_101043	0	0	0	0	0	1.67	0	0.556	-1.07214	0.725877
isoform_101045	14.53	0.04	13.21	18.76	20.37	0	9.26	13.043	-0.244019	0.942
isoform_101046	1.2	0	0	0	0	0	0.4	0	0.961507	0.746597
isoform_101047	0.43	0.43	0.64	0	0.1	0.21	0.5	0.103	1.58962	0.389066
isoform_101050	4.37	2.47	0	5.94	7.48	5.9	2.28	6.44	-1.27491	0.568449
isoform_101052	0	0.17	0	0	0.17	0	0.056	0.056	-0.0193316	0.995877
isoform_101053	0	0	0.66	0.84	0	2.71	0.22	1.183	-1.19806	0.725877
isoform_101056	0.78	0	0.44	0.96	0.45	0.85	0.406	0.753	-0.780708	0.793851
isoform_101058	0.25	0	0	0.22	0.26	0	0.083	0.16	-0.478393	0.86707
isoform_101059	0.11	0	0.32	0.2	0	0.1	0.143	0.1	0.156349	0.973012
isoform_10106	1.23	1.19	2.18	6.11	7.8	4.19	1.533	6.033	-2.0708	6.16512e-07
isoform_101063	0.8	0.22	0.38	0.57	1.15	0.23	0.466	0.65	-0.537563	0.793851
isoform_101065	0	0	0.41	0.78	0	0	0.136	0.26	-0.36873	0.890671
isoform_101066	0.34	0	0.59	0.05	0.47	0.57	0.31	0.363	-0.132878	0.980774
isoform_101067	3.66	5.14	3.6	5.88	5.18	0.61	4.133	3.89	-0.0824036	0.985975
isoform_101069	8.08	4.9	9.29	0.58	1.78	3.9	7.423	2.086	1.57097	0.105222
isoform_10107	0	0	0	0	0	0.02	0	0.006	NA	NA
isoform_101070	3.69	2.03	3.54	3.59	2.41	1.28	3.086	2.426	0.184617	0.914353
isoform_101072	6.63	3.83	2.15	2.16	3.92	2.14	4.203	2.74	0.432726	0.793851
isoform_101073	4.71	2.67	4.51	0.72	3.72	3.32	3.963	2.586	0.465173	0.793851
isoform_101074	0	0	0.48	0	0	0.99	0.16	0.33	-0.320251	0.909492
isoform_101076	50.33	38.08	67.45	57.21	83.29	12.96	51.953	51.153	-0.131356	0.943772
isoform_101077	3.6	3	1.02	2.11	2.11	2.31	2.54	2.176	0.0988536	0.963557
isoform_10108	3.77	2.27	3.03	1.93	3	1.64	3.023	2.19	0.317458	0.783764
isoform_101081	0.97	0.98	0.49	1.75	0.9	1.9	0.813	1.516	-0.956463	0.525029
isoform_101082	7.15	3.23	4.92	7.85	6.1	6.37	5.1	6.773	-0.546661	0.592794
isoform_101084	2.1	4.41	5.36	3.33	2.18	4.95	3.956	3.486	0.0127552	0.995877
isoform_101086	20.94	23.1	25.86	20.14	18.08	27.01	23.3	21.743	-0.0530996	0.93767
isoform_101090	3.78	1.53	3.77	1.87	0.36	1.42	3.026	1.216	1.03379	0.549269
isoform_101091	0	0	0	0	0.44	0	0	0.146	-0.797817	0.786123
isoform_101093	1.7	1.62	0.92	0	0	1.22	1.413	0.406	1.04296	0.754169
isoform_101094	0.16	0.12	0	0.11	0.24	0	0.093	0.116	-0.355978	0.911231
isoform_101095	0.75	0.11	0.54	0	0.42	0.21	0.466	0.21	0.730594	0.793851
isoform_101096	6.28	6.73	3.55	5.74	2.08	7.06	5.52	4.96	0.00100969	0.999237
isoform_101097	0	0	0	0	0	0.39	0	0.13	-0.731664	0.793851
isoform_101099	1.99	1.01	2.87	2.53	2.6	0.93	1.956	2.02	-0.168915	0.935436
isoform_1011	11.39	11.23	12.94	9.47	9.03	0	11.853	6.166	0.415417	0.88997
isoform_101100	0.46	0.36	1	0.37	0.23	0.36	0.606	0.32	0.741833	0.783764
isoform_101101	1.87	1.17	3.55	4.73	1.47	3.21	2.196	3.136	-0.632475	0.774669
isoform_101102	0	0	0	0	0.1	0	0	0.033	-0.474775	0.793851
isoform_101103	0	0	0	0.51	0.1	0.21	0	0.273	-2.35792	0.175684
isoform_101104	17.17	10.08	13.71	6.52	5.97	9.33	13.653	7.273	0.754153	0.147342
isoform_101105	0.34	0	0.3	0	0	0	0.213	0	1.42733	0.588971
isoform_101107	1.27	1.36	1.55	0.45	0.4	0.95	1.393	0.6	1.00895	0.480869
isoform_101109	0	0	0.03	0	0	0	0.01	0	NA	NA
isoform_10111	0	0	0	0	0.08	0.2	0	0.093	-1.9803	0.315551
isoform_101110	0	0	0	1.15	0	0.43	0	0.526	-2.17218	0.238405
isoform_101111	0.15	0	0	0	0	0	0.05	0	0.454616	0.793851
isoform_101113	3.32	0.84	3.75	1.32	0.58	0.78	2.636	0.893	1.29227	0.362815
isoform_101114	45.55	39.95	16.88	57.61	47.87	43.84	34.126	49.773	-0.681377	0.375663
isoform_101116	0.12	0	0	0	0	0	0.04	0	0.454616	0.793851
isoform_101119	11.39	1.69	1.19	0.12	2.64	5.7	4.756	2.82	0.49243	0.836191
isoform_10112	0	0	0	0.08	0.03	0.04	0	0.05	-1.96712	0.325724
isoform_101120	3.44	3.42	2.29	3.46	3.26	3.01	3.05	3.243	-0.23035	0.799632
isoform_101121	0.16	0.15	0.17	0	0	0	0.16	0	1.50809	0.556196
isoform_101122	10.51	10.15	10.45	13.43	13.43	13.33	10.37	13.396	-0.521438	0.0326849
isoform_101123	1.87	0	0.27	0	1.1	0	0.713	0.366	0.338889	0.914557
isoform_101124	7.34	6.53	13.28	16.89	17.62	11.81	9.05	15.44	-0.90539	0.120542
isoform_101125	8.32	6.77	6.39	3.73	5.04	2.89	7.16	3.886	0.722036	0.212677
isoform_101127	35.22	55.44	17.3	146.02	143.66	82.26	35.986	123.98	-1.86536	0.000488128
isoform_101128	1.19	0	0.6	0	0	0.25	0.596	0.083	1.27886	0.68914
isoform_10113	6.89	6.52	7.48	7.62	7.4	8.5	6.963	7.84	-0.318826	0.122154
isoform_101130	2.26	2.27	2.06	0.54	0.5	1.67	2.196	0.903	1.09075	0.39208
isoform_101131	1.29	2.68	1.23	0.39	0	0.4	1.733	0.263	2.3011	0.0489691
isoform_101132	1.62	1.16	0.52	0.79	0.72	1.56	1.1	1.023	-0.0682085	0.991364
isoform_101133	0.56	0	2.08	0	0	0	0.88	0	2.28298	0.199931
isoform_101136	2.62	3.16	3.48	1.89	3.31	2.96	3.086	2.72	0.0453898	0.985215
isoform_101137	62.15	14.82	52.52	2.27	2.69	2.44	43.163	2.466	3.73969	7.3657e-11
isoform_101138	0.1	0	0	0.1	0	0.15	0.033	0.083	-0.430614	0.881547
isoform_101139	0	0	1.52	0	0	0	0.506	0	1.02157	0.733439
isoform_10114	8.77	11.68	6.09	9.2	9.07	7.3	8.846	8.523	-0.101235	0.905654
isoform_101140	0.11	0.11	0.32	0	0.1	0	0.18	0.033	1.16552	0.728712
isoform_101142	0	0	0.96	0	0	0	0.32	0	0.914796	0.756427
isoform_101144	0.36	0	0	0	0	0.45	0.12	0.15	-0.116169	0.982198
isoform_101145	0	0.16	0	0	1.25	0.7	0.053	0.65	-1.89333	0.361303
isoform_101147	1.06	0.33	0.95	0	0.38	1.19	0.78	0.523	0.334379	0.906573
isoform_10115	0.85	0.57	0.57	0	0.31	0.75	0.663	0.353	0.58188	0.793851
isoform_101151	10.25	9.78	16.81	2.78	3.48	6.43	12.28	4.23	1.34663	0.0142437
isoform_101154	0	0.19	0	0.76	0.67	0.43	0.063	0.62	-2.45382	0.106495
isoform_101157	0	0.27	0	0	0	0	0.09	0	0.616677	0.793851
isoform_101159	33.68	22.95	21.89	5.18	1.33	4.91	26.173	3.806	2.47726	2.29342e-05
isoform_10116	17.48	12.86	13.36	11.36	12.95	10.16	14.566	11.49	0.191142	0.773636
isoform_101161	0.13	0.43	0.53	0.41	0.72	0.51	0.363	0.546	-0.641483	0.793851
isoform_101162	2.08	2.53	5.24	2.07	3.54	0.54	3.283	2.05	0.452437	0.793851
isoform_101163	0.17	0	0	0	0	0	0.056	0	0.454616	0.793851
isoform_101164	0	0	0.42	0	0	0	0.14	0	0.768003	0.793851
isoform_101165	0	1.02	2.88	2.04	1.84	2.22	1.3	2.033	-0.607007	0.793851
isoform_101167	5.67	7.18	9.72	4.1	4.12	6.65	7.523	4.956	0.448427	0.666547
isoform_101169	5.01	0	2.04	0	0.93	1.12	2.35	0.683	0.952513	0.786123
isoform_10117	7.06	11.65	5.73	15.17	9.94	19.83	8.146	14.98	-1.00156	0.051877
isoform_101170	0.86	0	0	4.84	2.45	0	0.286	2.43	-1.41831	0.618498
isoform_101173	0	0.13	0	0	0	0	0.043	0	0.45071	0.793851
isoform_101174	17.16	15.11	27.63	4.34	4.67	3.7	19.966	4.236	2.04423	3.9967e-08
isoform_101175	0	0	0	0	0.66	0	0	0.22	-0.846408	0.774669
isoform_101177	0.66	1.1	0	0.41	0.8	0	0.586	0.403	0.33203	0.917104
isoform_101178	6.99	5.83	7.2	5.2	4.59	4.14	6.673	4.643	0.372039	0.62722
isoform_101179	0	0	0.82	0.61	0	0	0.273	0.203	0.0771973	0.995877
isoform_10118	0	0.49	0.54	0	0	0.38	0.343	0.126	0.540513	0.836809
isoform_101181	0	0	0	0	1.18	0	0	0.393	-0.917398	0.756427
isoform_101182	9.3	1.27	7.64	8.4	8.94	14.13	6.07	10.49	-0.840438	0.633645
isoform_101183	0.09	0	0	0	0	0	0.03	0	NA	NA
isoform_101185	0.14	0.59	0	0	0.28	0.7	0.243	0.326	-0.252727	0.941899
isoform_101187	136.91	119.17	98.26	49.27	86.79	10.55	118.113	48.87	1.02389	0.385445
isoform_101189	9.34	6.32	9.76	1.03	0.43	1.9	8.473	1.12	2.61071	1.99039e-05
isoform_10119	2.5	2.41	2.31	0.31	0.41	1.06	2.406	0.593	1.80825	0.00295956
isoform_101190	0	0	0.21	0	0	0.19	0.07	0.063	-0.016198	0.995877
isoform_101191	0.91	2.17	0	0.12	2.7	0	1.026	0.94	-0.00535597	0.997929
isoform_101192	0	0.94	0	0	0	0	0.313	0	0.887969	0.764138
isoform_101193	0	0	0.98	0	0.2	0	0.326	0.066	0.779732	0.793851
isoform_101194	0	0	0	0	0.26	0.26	0	0.173	-1.49111	0.556196
isoform_101195	3.05	2.28	3.75	1.09	1.01	1.03	3.026	1.043	1.3755	0.044339
isoform_101196	0	0.78	1.87	0.97	0	0	0.883	0.323	0.482022	0.864507
isoform_101197	12.05	9.72	12.25	1.53	3.79	4.41	11.34	3.243	1.64349	0.000576525
isoform_101198	1.18	1.52	1.29	1.24	0.84	0.73	1.33	0.936	0.32506	0.803463
isoform_101199	1.56	1.05	2.07	2.93	1.36	1.83	1.56	2.04	-0.531495	0.77697
isoform_1012	1.07	1.76	1.3	0.85	1.27	0.78	1.376	0.966	0.358545	0.729645
isoform_10120	0.1	0.11	0	0.35	0	0.09	0.07	0.146	-0.677761	0.793851
isoform_101200	0	0	0	0.08	0	0	0	0.026	NA	NA
isoform_101201	0	0.41	0	0.5	0	0	0.136	0.166	-0.20168	0.949421
isoform_101202	3.95	1.06	3.75	2.81	6.78	5.54	2.92	5.043	-0.869638	0.571204
isoform_101203	0	0	0	0.44	0.87	0.79	0	0.7	-3.23198	0.0204078
isoform_101205	0	0.13	0	0.14	0.24	0.24	0.043	0.206	-1.3032	0.674912
isoform_101207	0	0	0	0.22	0	0	0	0.073	-0.658417	0.793851
isoform_101208	3.67	7.35	5.71	5.91	2.42	3.99	5.576	4.106	0.255426	0.831623
isoform_101209	0	0.71	0	6.27	0	4.15	0.236	3.473	-1.75161	0.434067
isoform_101210	2.85	0	2.12	0	0.69	0	1.656	0.23	1.17909	0.725877
isoform_101211	0	0	0	0.28	0.42	0.12	0	0.273	-2.27398	0.203473
isoform_101212	4.42	4.91	8.46	5.19	0.86	0.23	5.93	2.093	1.01043	0.702041
isoform_101215	0	0.18	0.59	0.33	0.2	0.19	0.256	0.24	0.0837596	0.995877
isoform_101218	0	0	0	0	1.21	0	0	0.403	-0.988294	0.736392
isoform_101219	0.09	13.36	5.08	7.72	13.68	0	6.176	7.133	-0.154604	0.972311
isoform_10122	1.61	1.26	1.05	1.42	1.52	2.52	1.306	1.82	-0.595626	0.405647
isoform_101222	0	0	0	18.53	19.4	683.88	0	240.603	-3.49549	0.0128465
isoform_101223	0.7	0	0	0	0	0.31	0.233	0.103	0.257786	0.932214
isoform_101224	0	0	0.7	0	0	1.21	0.233	0.403	-0.236211	0.937221
isoform_101227	8.14	0.98	1.15	5.38	6.14	3.18	3.423	4.9	-0.548547	0.793851
isoform_101229	0	0.2	0	0.16	0	0	0.066	0.053	0.216277	0.943772
isoform_10123	0	0	0	1.48	1.51	0	0	0.996	-3.29444	0.0223254
isoform_101230	0	0	0	0	0	1.75	0	0.583	-1.02094	0.733439
isoform_101231	4.19	1.19	1.62	0.1	0.1	0.31	2.333	0.17	2.93565	0.00487834
isoform_101232	0	0	0	0	3.22	0	0	1.073	-1.17749	0.682089
isoform_101234	7.36	4.32	7.66	0	2.61	2.28	6.446	1.63	1.5035	0.382319
isoform_101235	0	0.57	0	0.32	0.66	0.3	0.19	0.426	-0.821136	0.793851
isoform_101236	0.78	0.74	0.73	0	0.13	0.05	0.75	0.06	2.8715	0.0286164
isoform_101238	0	0	0	0	0	0.5	0	0.166	-0.844156	0.774669
isoform_10124	5.62	6.18	5.87	5.19	5.23	4.36	5.89	4.926	0.107323	0.793851
isoform_101240	0	0.62	0	6.61	1.82	0	0.206	2.81	-1.66323	0.481267
isoform_101244	0.09	0	0	0.05	0.12	0.39	0.03	0.186	-0.640986	0.793851
isoform_101246	0.46	0.48	1.81	1.12	1.75	1.19	0.916	1.353	-0.624268	0.793851
isoform_101247	0	0	0	2.54	0	0	0	0.846	-1.1469	0.69569
isoform_101248	1.24	1.8	0.45	0.3	2.31	1.82	1.163	1.476	-0.376579	0.866179
isoform_10125	2.46	2.12	1.66	0.71	0.63	0	2.08	0.446	1.61559	0.324372
isoform_101250	1.05	0.74	0.67	4.33	5.79	1.66	0.82	3.926	-2.19882	0.00666397
isoform_101251	0.43	0.41	0	0	0	0	0.28	0	1.6626	0.468761
isoform_101252	1.41	0	0	0.49	0	0.21	0.47	0.233	0.392376	0.895769
isoform_101254	8.25	9.84	10.06	16.32	13.33	10.57	9.383	13.406	-0.66719	0.127783
isoform_101255	0	0	0	0.33	0	0	0	0.11	-0.747003	0.793851
isoform_101256	0	0.46	1.52	0	0.63	2.21	0.66	0.946	-0.330358	0.91875
isoform_10126	1.56	2.83	2.59	3.61	3.91	3.23	2.326	3.583	-0.773969	0.0553739
isoform_101260	4.26	1.5	8.41	0	1.37	1.38	4.723	0.916	1.71994	0.303345
isoform_101261	69.07	40.83	47.94	20.9	6.14	15.27	52.613	14.103	1.64228	0.0061268
isoform_101262	0	0	0	0	0.26	77.43	0	25.896	-0.93167	0.750386
isoform_101263	3.57	1.95	7.7	8.84	11.11	8.6	4.406	9.516	-1.2002	0.142071
isoform_101264	2.96	0	4.03	0.95	2.19	2.13	2.33	1.756	0.204021	0.949532
isoform_101265	0	2.79	0	1.35	0	0	0.93	0.45	0.209682	0.945629
isoform_101267	18.48	9.87	15.98	5.9	7.56	8.61	14.776	7.356	0.845696	0.0763353
isoform_101268	0	0	0	0.15	0	0	0	0.05	-0.491608	0.793851
isoform_101269	5.61	4.14	2.19	1.06	0.51	0	3.98	0.523	2.26727	0.0675919
isoform_10127	4.29	5.1	5.77	2.86	2.65	3.53	5.053	3.013	0.595519	0.0386375
isoform_101270	0	0	0	0.49	0	0	0	0.163	-0.809985	0.783764
isoform_101271	44.08	36.91	45.78	32.65	35.35	53.06	42.256	40.353	-0.0797221	0.904594
isoform_101272	0	1.97	3.01	0	0	1.2	1.66	0.4	0.785788	0.793851
isoform_101273	3.53	13.67	9.13	1.69	5.65	3.5	8.776	3.613	1.05466	0.368581
isoform_101274	0	1.13	0	0	0	0	0.376	0	0.959382	0.746732
isoform_101275	1.28	2.07	2	0.59	2.64	2	1.783	1.743	-0.0911843	0.975034
isoform_101276	6.42	6.83	7.68	6.89	7.43	5.75	6.976	6.69	-0.0948949	0.900205
isoform_101278	0.33	0.07	0	0	0	0	0.133	0	0.708866	0.793851
isoform_10128	7.02	5.83	4.53	15.32	15.91	3.91	5.793	11.713	-1.11458	0.18342
isoform_101281	0.22	0	0	0	0	0	0.073	0	0.454616	0.793851
isoform_101283	0	1.1	0	0	0.78	0	0.366	0.26	0.116661	0.981807
isoform_101284	0.55	1.65	0.84	0.94	0.33	0.52	1.013	0.596	0.472495	0.793851
isoform_101285	247.74	185.3	235.93	489.66	467.78	406.63	222.99	454.69	-1.17838	1.25938e-08
isoform_101286	0	1.72	0	0.1	0	0	0.573	0.033	0.913723	0.775812
isoform_101288	0	0	0	0.34	0	0	0	0.113	-0.747003	0.793851
isoform_101289	0	0.11	0	0.1	0.1	0	0.036	0.066	-0.439332	0.879804
isoform_10129	11.79	10.65	11.21	3.17	7.22	12.09	11.216	7.493	0.443828	0.734472
isoform_101291	0	0.44	0	0.41	0	0.46	0.146	0.29	-0.482541	0.865594
isoform_101292	0.93	0.77	0.65	0.24	0.13	0.51	0.783	0.293	1.25618	0.452839
isoform_101293	38.91	23.72	20.18	45.73	37.05	33.71	27.603	38.83	-0.638596	0.271558
isoform_101295	68.95	57.23	77.18	50.28	44.67	58.44	67.786	51.13	0.251401	0.604763
isoform_101296	0	0	0	0.22	0.59	0.39	0	0.4	-2.70362	0.0861345
isoform_101297	0	0	0	0.24	0	0	0	0.08	-0.658417	0.793851
isoform_101299	0	0.13	0	0.12	0.13	0.13	0.043	0.126	-0.833721	0.793851
isoform_1013	2.39	2.62	2.83	2.69	3.73	3.29	2.613	3.236	-0.455013	0.0625195
isoform_10130	2.87	4.22	3.28	9.78	11.04	7.23	3.456	9.35	-1.57519	3.87957e-08
isoform_101300	0.23	0.43	0.74	6.48	4.16	2.88	0.466	4.506	-3.19508	8.3748e-05
isoform_101303	1.02	0	1	1.1	0.69	0.21	0.673	0.666	-0.0843297	0.995014
isoform_101305	4.36	6.49	6.41	2.02	5.08	9.15	5.753	5.416	-0.0325875	0.995877
isoform_10131	0	0.24	0	0.3	0.2	0	0.08	0.166	-0.532778	0.841098
isoform_101310	0	0	0	0.32	0.21	0	0	0.176	-1.44031	0.581297
isoform_101311	0	0	0.28	10.14	9.31	7.48	0.093	8.976	-5.95971	3.65627e-15
isoform_101312	0	0	0	0.98	0	0	0	0.326	-0.976728	0.740017
isoform_101313	0	0	0.39	3.79	1.04	1.84	0.13	2.223	-3.18071	0.00968441
isoform_101314	0.11	0.11	0.11	0	0	0.29	0.11	0.096	0.273903	0.935669
isoform_101318	8.66	7.67	7.78	0.82	0.86	0	8.036	0.56	3.46053	1.18004e-06
isoform_101319	0.67	1.98	0.68	1.02	0.92	1.24	1.11	1.06	0.00461279	0.997257
isoform_10132	3.3	0.43	0	1.86	0	2.33	1.243	1.396	-0.114394	0.986511
isoform_101322	0	0.11	0	0	0	0	0.036	0	0.45071	0.793851
isoform_101324	0	0	0.57	1.11	0.64	0	0.19	0.583	-0.777065	0.793851
isoform_101325	1.6	1.84	1.7	3.21	2.57	1.25	1.713	2.343	-0.580009	0.733439
isoform_101326	0.85	0.79	0.84	1.12	0.57	0.3	0.826	0.663	0.197449	0.935269
isoform_101327	3.03	1.74	2.54	0.49	0.68	0.8	2.436	0.656	1.72409	0.0292053
isoform_101329	0	2.7	3.89	2.61	3.2	2.52	2.196	2.776	-0.37532	0.884252
isoform_10133	0	0	0.03	0	0	0	0.01	0	0.449952	0.793851
isoform_101330	0	0	0	0	2.22	0	0	0.74	-1.11156	0.711221
isoform_101332	1.72	3.9	4.06	0	0.52	0.48	3.226	0.333	2.84577	0.00290152
isoform_101334	0	0	0.22	0	0.23	0.25	0.073	0.16	-0.468147	0.870896
isoform_101336	3.63	4.88	5.03	1.53	1.42	1.43	4.513	1.46	1.47064	0.00297013
isoform_101337	5.58	0	1.08	4.24	4.98	1.95	2.22	3.723	-0.638328	0.793851
isoform_101338	2	1.14	2.1	1.36	1.85	3.37	1.746	2.193	-0.429256	0.793851
isoform_101339	0	0.27	0.09	0	0.12	0	0.12	0.04	0.239847	0.935967
isoform_101340	57.42	53.85	66.83	16.28	10.92	12.08	59.366	13.093	1.99585	4.29237e-15
isoform_101341	0.77	0	0	0	0	0.81	0.256	0.27	-0.0636216	0.995877
isoform_101343	171.06	124.88	122.58	34.45	71.76	39.27	139.506	48.493	1.35614	0.000301643
isoform_101345	4.67	6.47	3.17	6.59	7.28	4.98	4.77	6.283	-0.537058	0.578053
isoform_101346	26.33	17.16	29.29	133.09	84.47	68.15	24.26	95.236	-2.08654	2.17796e-07
isoform_101347	0	0	0	0	0.67	0	0	0.223	-0.846408	0.774669
isoform_101348	0	3.91	4.41	2.08	7.13	5.87	2.773	5.026	-0.737013	0.793851
isoform_10135	1.19	1.91	1.46	1.01	0.66	1.25	1.52	0.973	0.472884	0.674912
isoform_101350	0	0	1.55	0	0	0	0.516	0	1.02157	0.733439
isoform_101352	0	0	0	0.47	0	7.49	0	2.653	-2.48795	0.139172
isoform_101353	12.44	12.98	15.14	7.31	5.33	13.81	13.52	8.816	0.451276	0.699768
isoform_101354	7.41	4.84	8.62	1.18	2.4	2.24	6.956	1.94	1.63113	0.00323176
isoform_101355	3.71	2.48	2.12	7.34	9.64	2.32	2.77	6.433	-1.28308	0.191288
isoform_101358	0	0	1.42	1.21	0	0	0.473	0.403	-0.0108176	0.995877
isoform_10136	35.72	55.2	40.87	47.74	48.59	45.09	43.93	47.14	-0.254991	0.619929
isoform_101361	0	0	0	0.1	0	0.1	0	0.066	-1.09607	0.725877
isoform_101362	0.69	0.27	0	1.32	0.23	0	0.32	0.516	-0.503109	0.85759
isoform_101363	0.3	0	0	0	0	0.27	0.1	0.09	-0.00757243	0.996749
isoform_101364	3.25	2.46	2.33	5.64	2.93	4.89	2.68	4.486	-0.890297	0.230538
isoform_101366	59.04	40.48	60.72	20.2	24.26	10.23	53.413	18.23	1.34992	0.00428641
isoform_101367	0	0	0.24	0	0	0	0.08	0	0.615974	0.793851
isoform_101368	0	0.22	0	0	0	0.16	0.073	0.053	0.24438	0.935436
isoform_101369	0.39	0.44	0.85	0	0	2.45	0.56	0.816	-0.397976	0.896796
isoform_10137	16.86	18.67	18.88	25.15	17.51	18.52	18.136	20.393	-0.328712	0.516534
isoform_101370	35.15	20.26	30.86	0.14	0	3.26	28.756	1.133	3.41214	0.00323176
isoform_101372	0	0	0	1.19	1.07	0	0	0.753	-2.42849	0.156032
isoform_101374	0.14	0	0.17	0	0	0	0.103	0	1.03851	0.734472
isoform_101375	1.96	0.31	1.13	0.83	0	2.37	1.133	1.066	-0.0452339	0.995877
isoform_10138	0.11	0.18	0.07	0.54	0.42	0	0.12	0.32	-1.24775	0.659433
isoform_101380	0	0	18.9	3.24	11.48	5.46	6.3	6.726	-0.0856597	0.995877
isoform_101385	1.37	0	0	4.74	0	3.22	0.456	2.653	-1.1041	0.74061
isoform_10139	12.63	15.69	11.28	27.39	28.37	26.68	13.2	27.48	-1.20382	4.82403e-12
isoform_101390	0.49	0	0	0	0	0	0.163	0	0.771526	0.793851
isoform_101391	3.5	0.94	0	0	0	0.91	1.48	0.303	0.92964	0.793851
isoform_101392	12.11	20.41	5.77	0	0	0.62	12.763	0.206	4.88314	7.65163e-08
isoform_101394	1.47	2.1	0.63	25.75	1.95	25.54	1.4	17.746	-3.2427	0.000764721
isoform_101395	0	0	0	0	0	0.39	0	0.13	-0.731664	0.793851
isoform_101397	0	0	0	0	0.11	0	0	0.036	-0.474775	0.793851
isoform_10140	1.22	2.07	0.46	1.86	1.04	1.33	1.25	1.41	-0.333512	0.809603
isoform_101401	0.02	0	0	0	0	0	0.006	0	NA	NA
isoform_101403	0.26	0.4	0	0	0.12	0.12	0.22	0.08	0.68815	0.793851
isoform_101405	2.8	4.22	4.1	2.01	0.25	1.61	3.706	1.29	1.21655	0.381408
isoform_101406	45.06	62.06	20.95	11.59	16.57	12.68	42.69	13.613	1.44829	0.00498711
isoform_101408	32.51	23.96	28.38	13.67	13.67	11.79	28.283	13.043	0.956636	0.000158562
isoform_101409	0	0	0	0	0.49	0	0	0.163	-0.797817	0.786123
isoform_10141	17.52	17.54	12.43	20.3	19.48	22.18	15.83	20.653	-0.529265	0.0442367
isoform_101411	0.34	0	0.38	0	0.53	0.35	0.24	0.293	-0.279017	0.934064
isoform_101412	0	2.08	0.77	2.29	0.08	0	0.95	0.79	0.00447684	0.998177
isoform_101415	2.58	3.67	3.5	4.41	4.66	2.97	3.25	4.013	-0.458236	0.692294
isoform_101416	64.94	113.14	71.6	475.81	341.39	225.64	83.226	347.613	-2.1761	6.21996e-08
isoform_101417	3	5.57	0	6.74	5.74	4.29	2.856	5.59	-0.868418	0.774669
isoform_101419	0.49	0.27	0.75	1.28	1.11	1.76	0.503	1.383	-1.56153	0.134663
isoform_10142	0.39	0.15	0	0.15	0.12	0.26	0.18	0.176	-0.0534602	0.995877
isoform_101420	3.15	0.4	4.7	0	0.34	0	2.75	0.113	2.84795	0.0454684
isoform_101424	23.09	19.37	24.68	17.12	20.55	24.01	22.38	20.56	-0.0230476	0.98138
isoform_101427	3.08	0.27	0.07	2.48	2.48	0	1.14	1.653	-0.380734	0.904648
isoform_101429	0	0	0.63	2.38	0.68	0	0.21	1.02	-1.11174	0.739036
isoform_10143	3.05	5.26	1.76	4.01	0.01	2.88	3.356	2.3	0.255423	0.93453
isoform_101430	0	0.81	0	0	0	0	0.27	0	0.887969	0.764138
isoform_101431	0.72	0.58	0.52	1.48	1.8	1.25	0.606	1.51	-1.37818	0.125764
isoform_101432	0	0	0	0	0.48	0	0	0.16	-0.797817	0.786123
isoform_101434	0.33	0.54	1.09	0	1.4	0	0.653	0.466	0.174391	0.966567
isoform_101436	0	0	0	0	0.42	0	0	0.14	-0.797817	0.786123
isoform_101437	1.63	1.44	1.86	0	1.86	0.84	1.643	0.9	0.608141	0.793851
isoform_10144	15.74	11.05	10.26	16.93	17.44	16.89	12.35	17.086	-0.61043	0.043316
isoform_101440	0	0	0	0.26	0	0	0	0.086	-0.658417	0.793851
isoform_101442	0	0	0.34	0	0	0	0.113	0	0.705161	0.793851
isoform_101443	33.69	23.42	35.21	13.95	15.09	24.13	30.773	17.723	0.645468	0.16121
isoform_101444	0.12	0	0.11	0	0	0	0.076	0	1.03851	0.734472
isoform_101445	1.46	1.97	1.72	0.51	1.67	1.28	1.716	1.153	0.450474	0.793851
isoform_101446	67.51	67.33	25.72	28.45	61.12	33.91	53.52	41.16	0.231137	0.830935
isoform_101448	0	0	0	0	0	0.15	0	0.05	-0.471476	0.793851
isoform_101449	0	0	0.56	0.26	0	0	0.186	0.086	0.298549	0.916574
isoform_10145	12.32	5.09	13.75	13.27	11.09	12.25	10.386	12.203	-0.372497	0.764138
isoform_101450	0	0	0.49	0	0	0	0.163	0	0.768003	0.793851
isoform_101451	9.73	8.53	19.55	7.49	9.97	9.27	12.603	8.91	0.341644	0.788892
isoform_101452	16.61	17.02	14.51	15.55	11.66	15.65	16.046	14.286	0.0069757	0.995877
isoform_101453	0	0	0	0.18	0.25	0	0	0.143	-1.30426	0.64839
isoform_101455	0	1.15	0.21	1.55	4.57	4.9	0.453	3.673	-2.42383	0.0691957
isoform_101457	0	0	0	0	0.05	0.08	0	0.043	NA	NA
isoform_101458	0	0.46	0.58	0.18	0	0.18	0.346	0.12	1.14549	0.733439
isoform_101459	0.12	0	0	0	0	0	0.04	0	0.454616	0.793851
isoform_10146	26.27	25.18	27.96	21.2	25.1	26	26.47	24.1	-0.00966644	0.989449
isoform_101460	0	0	0	0.3	0	0	0	0.1	-0.658417	0.793851
isoform_101464	0.1	0	0.95	1.51	0	0	0.35	0.503	-0.259227	0.93115
isoform_101465	2.43	3.73	3.77	2.85	2.72	3.13	3.31	2.9	0.039282	0.988128
isoform_101466	0.91	0.05	0	3.32	3.41	2.68	0.32	3.136	-2.41891	0.100797
isoform_101469	0	0	0.16	0	0.25	0	0.053	0.083	-0.280317	0.924492
isoform_10147	3.34	3.03	2.08	2.19	3.14	3.65	2.816	2.993	-0.226419	0.793851
isoform_101470	0	0	0	1.17	0	0	0	0.39	-1.01416	0.734472
isoform_101472	0	0	0	0.33	0	0	0	0.11	-0.747003	0.793851
isoform_101474	0	0.75	0.36	0	0	0.86	0.37	0.286	0.0494116	0.995877
isoform_101476	3.36	2.19	5.54	0	0.11	0.42	3.696	0.176	3.52677	0.000166994
isoform_101477	7.17	8.34	13.82	12.59	10.82	14.34	9.776	12.583	-0.504967	0.483136
isoform_101478	0	0.43	0	0.12	1.11	1.49	0.143	0.906	-1.83007	0.369495
isoform_101481	57.87	96.59	31.13	52.89	48.14	29.3	61.863	43.443	0.32738	0.793851
isoform_101483	0	0.22	0	0.21	0	0	0.073	0.07	-0.0462966	0.995877
isoform_101484	0	0	0.13	0	0	0	0.043	0	0.449952	0.793851
isoform_101485	5.49	1.52	4.94	8.34	3.56	11.54	3.983	7.813	-1.03585	0.419053
isoform_101486	0	1.04	0	0	0	1.95	0.346	0.65	-0.27128	0.926667
isoform_101487	0	0.58	0	0	0.47	0	0.193	0.156	0.0666216	0.995877
isoform_101489	8.49	6.48	8.05	1.49	2.06	3.05	7.673	2.2	1.63251	0.000187308
isoform_10149	0.43	0	0	0.54	0	0	0.143	0.18	-0.160499	0.963638
isoform_101493	12.82	10.67	11.96	9.68	11.61	11.04	11.816	10.776	-0.0219255	0.985458
isoform_101495	0.76	0.66	0	0	0	0	0.473	0	2.09506	0.268571
isoform_101498	515.93	242.04	632.31	167.19	115.89	116.37	463.426	133.15	1.57915	0.000713949
isoform_1015	0.04	0.11	0	0.09	0.02	0	0.05	0.036	0.139849	0.9789
isoform_10150	7.89	7.13	6.6	7.77	5.42	5.96	7.206	6.383	0.0130703	0.995877
isoform_101501	68.23	55.13	110.45	35.12	71.08	48.8	77.936	51.666	0.438329	0.657813
isoform_101502	0.22	0.24	0.58	0	0.24	0	0.346	0.08	1.2719	0.674912
isoform_101503	5.15	3.73	4.31	1.13	6.24	6.51	4.396	4.626	-0.159859	0.935475
isoform_101504	0	0	0	0.55	0.69	0	0	0.413	-1.96946	0.320408
isoform_101506	1.07	1.9	0.69	0	0.55	1	1.22	0.516	0.870282	0.766875
isoform_101507	0.93	0.61	0.66	0.99	1.63	0.27	0.733	0.963	-0.462006	0.80121
isoform_101508	1.51	0	1.5	5.85	0	0	1.003	1.95	-0.475982	0.864494
isoform_10151	0	0	0.05	0.09	0.12	0.11	0.016	0.106	-2.19962	0.18383
isoform_101510	15.49	16.88	33.73	8.54	14.78	10.51	22.033	11.276	0.794474	0.237325
isoform_101511	0.48	0	0	0	0	0	0.16	0	0.771526	0.793851
isoform_101512	0	0	0	2.11	1.07	0.99	0	1.39	-4.22918	0.000337872
isoform_101513	2.05	1.33	0.2	0.53	1.85	5.41	1.193	2.596	-0.954376	0.740001
isoform_101517	0.25	0	0	0	0	0	0.083	0	0.620156	0.793851
isoform_10152	0.03	0.07	0	0.1	0.03	0	0.033	0.043	-0.467527	0.871869
isoform_101521	2.84	3.57	4.08	1.5	0	0	3.496	0.5	1.67749	0.432751
isoform_101523	0	0	0	0	0.32	0.21	0	0.176	-1.61505	0.491427
isoform_101524	0.81	0.28	0.33	0.14	0.33	0	0.473	0.156	1.20759	0.677925
isoform_101525	0	0.21	0	0	0	0.41	0.07	0.136	-0.426999	0.867842
isoform_101526	2.78	0	1.5	2.95	2.77	1.96	1.426	2.56	-0.769128	0.793851
isoform_101528	0.28	0	0	0.36	0	0	0.093	0.12	-0.194931	0.951452
isoform_101529	2.3	3.5	9.59	8.35	5.25	2.52	5.13	5.373	-0.226533	0.908276
isoform_10153	0.62	0.77	0.13	0.66	0.35	0.64	0.506	0.55	-0.270544	0.887845
isoform_101535	0.81	0	0	0.3	0.46	0.99	0.27	0.583	-0.65304	0.793851
isoform_101536	0	0	0	0	0	1.21	0	0.403	-1.00475	0.734472
isoform_101537	2.61	2.22	2.72	0.5	0.91	1.61	2.516	1.006	1.10468	0.231904
isoform_10154	5.03	7.02	5.13	5.35	3.05	8.44	5.726	5.613	-0.118214	0.920213
isoform_101541	0	0.11	0	0	0	0	0.036	0	0.45071	0.793851
isoform_101542	0	0.63	0	0.39	0	0.67	0.21	0.353	-0.398634	0.895012
isoform_101543	112.11	99.42	160.64	100.47	110.74	156.37	124.056	122.526	-0.126401	0.840719
isoform_101545	9.12	11.19	9.57	18.47	15.37	14.32	9.96	16.053	-0.841365	0.00451838
isoform_101546	0	0	0	0	0.29	0	0	0.096	-0.64383	0.793851
isoform_101547	2.25	0.92	1.06	2.82	1.44	1.43	1.41	1.896	-0.564892	0.793851
isoform_101548	9.92	10.63	12.86	10.87	12.44	10.24	11.136	11.183	-0.163807	0.793851
isoform_101549	76.22	67.44	88.64	312.44	233.12	181.12	77.433	242.226	-1.78729	4.19662e-09
isoform_101550	0.71	0	0.71	0	1.06	0	0.473	0.353	0.0840645	0.995877
isoform_101551	0.32	0	0	0.1	0	0.1	0.106	0.066	0.19838	0.957998
isoform_101552	0	0.13	0	0	1.22	0	0.043	0.406	-0.882059	0.786123
isoform_101554	0	0.04	0	0.04	0	0	0.013	0.013	NA	NA
isoform_101556	0	0	0	0	0.31	0.21	0	0.173	-1.61505	0.491427
isoform_101557	1.35	0.71	0.8	0.11	0.33	0.55	0.953	0.33	1.21759	0.479772
isoform_101558	0	0	0	0.4	0	0.93	0	0.443	-2.01537	0.300906
isoform_101559	3.88	3.81	2.15	3.37	3.34	4.77	3.28	3.826	-0.348778	0.793851
isoform_10156	0.7	0	0.41	1.02	1.16	0.64	0.37	0.94	-1.14017	0.656505
isoform_101561	0.43	0	0	0	0	0	0.143	0	0.771526	0.793851
isoform_101562	10.38	6.25	11.1	0	0.39	1.3	9.243	0.563	3.40495	0.000135405
isoform_101563	0	0	0.23	0.24	0	1.61	0.076	0.616	-1.32529	0.666925
isoform_101564	0	0	0	0.4	0	0	0	0.133	-0.747003	0.793851
isoform_101565	31.35	23.11	55.55	25.27	26.84	28.7	36.67	26.936	0.284761	0.793851
isoform_101566	0	0.77	0	0	0	0	0.256	0	0.816907	0.783764
isoform_101567	3.08	3.3	5.88	1.18	2.16	0	4.086	1.113	1.35978	0.49409
isoform_101568	8.72	9.15	3.09	7.78	5.28	16.5	6.986	9.853	-0.59297	0.740017
isoform_101569	0	0.51	0	0	0	0.61	0.17	0.203	-0.167209	0.961743
isoform_10157	0.51	0	0	2.41	0	42.64	0.17	15.016	-0.896621	0.764138
isoform_101570	0	0	0.34	0	0	0	0.113	0	0.705161	0.793851
isoform_101572	0	0	0	0	0.3	0	0	0.1	-0.64383	0.793851
isoform_101573	0	0	0	0.38	0	0.59	0	0.323	-2.02027	0.299679
isoform_101574	13.86	12.64	13.98	2.78	5.42	7.28	13.493	5.16	1.22509	0.0056798
isoform_101576	1.79	2.67	2.53	18.39	1.54	7.5	2.33	9.143	-1.87751	0.097939
isoform_101577	1.77	2	2.3	2.29	2.33	1.51	2.023	2.043	-0.164979	0.895976
isoform_101578	48.27	0.01	44.2	0.15	11.74	19.14	30.826	10.343	0.664121	0.793851
isoform_10158	1.26	3.93	0.86	1.65	1.77	0.7	2.016	1.373	0.347538	0.822939
isoform_101581	0.4	0	0	0	0	0	0.133	0	0.708866	0.793851
isoform_101582	145.28	115.53	193.67	69.1	86.91	98.83	151.493	84.946	0.679032	0.0377849
isoform_101583	0	0.06	0	0	0	0	0.02	0	NA	NA
isoform_101584	0.74	1.7	0.52	1.31	2.53	0.64	0.986	1.493	-0.718387	0.773636
isoform_101586	0	0	2.33	7.22	0	0	0.776	2.406	-0.490261	0.835322
isoform_101587	0	0.26	0.25	0.52	0	0.34	0.17	0.286	-0.657107	0.793851
isoform_10159	0	0	0.22	0.19	0	0.09	0.073	0.093	-0.192407	0.959905
isoform_101590	343.81	265.9	318.63	43.09	59.11	42.18	309.446	48.126	2.51582	1.18713e-36
isoform_101591	1.7	1.99	1.78	0.61	0.68	0.43	1.823	0.573	1.48746	0.0774842
isoform_101592	0	0	1	0	0	0.62	0.333	0.206	0.179575	0.957527
isoform_101593	0	0	0	0	0	0.54	0	0.18	-0.844156	0.774669
isoform_101594	0	46.56	12.05	7.1	0	4.21	19.536	3.77	0.76543	0.793851
isoform_101595	0	0	0	0.23	0	0	0	0.076	-0.658417	0.793851
isoform_101596	2.28	2.62	2.29	1.22	2.81	1.57	2.396	1.866	0.224881	0.859289
isoform_101597	2.67	0	0	3.69	3.61	12.42	0.89	6.573	-1.79561	0.387969
isoform_101598	0.23	0	2.46	0	0	1.11	0.896	0.37	0.430949	0.880983
isoform_101599	3.96	9.63	0	5.99	11.24	1.84	4.53	6.356	-0.457739	0.860934
isoform_10160	0	0.71	0	0	1.19	2.12	0.236	1.103	-0.946196	0.786123
isoform_101600	0	0	0	0	0.29	0	0	0.096	-0.64383	0.793851
isoform_101601	5.77	5.15	4.13	3.61	5.01	6.26	5.016	4.96	-0.110528	0.910469
isoform_101602	0	0	0	0	0	0.38	0	0.126	-0.731664	0.793851
isoform_101605	89.35	102.54	136.98	232.88	219.41	200.32	109.623	217.536	-1.13972	8.51917e-07
isoform_101606	0	0	0	0.67	1.45	0	0	0.706	-2.25948	0.207956
isoform_101607	3.48	0	2.25	0	0.8	1.3	1.91	0.7	0.833146	0.793851
isoform_101608	0	0	0	0	0	0.21	0	0.07	-0.640986	0.793851
isoform_101609	0	0	0	1.21	1.27	1.01	0	1.163	-4.13525	0.000460301
isoform_10161	1.14	0	0	0	2.02	0.73	0.38	0.916	-0.527739	0.84154
isoform_101610	3.38	4.71	3.77	5.05	5.01	3.42	3.953	4.493	-0.337832	0.773636
isoform_101611	165.57	138.53	194.06	167.76	192.71	218.63	166.053	193.033	-0.364116	0.186946
isoform_101612	1.04	1.77	2.29	2	0	2.3	1.7	1.433	0.0413049	0.995877
isoform_101613	0	0	4.58	1.13	3.37	0	1.526	1.5	-0.0268314	0.995877
isoform_101614	0	0	0.27	0	0	0	0.09	0	0.615974	0.793851
isoform_101615	2.39	0.77	1.74	1.33	1.37	1.05	1.633	1.25	0.246815	0.881769
isoform_101616	2.19	1.7	0	3.37	21.29	14.79	1.296	13.15	-2.70114	0.0250221
isoform_101617	1.04	1.63	9.85	1.23	3.21	3.22	4.173	2.553	0.464077	0.809613
isoform_101618	0	0	0.23	0	0	0	0.076	0	0.449952	0.793851
isoform_101619	0.75	0.54	0.32	0.41	0.21	0.21	0.536	0.276	0.663995	0.793851
isoform_10162	0.04	0.04	0.04	0.04	0	0.16	0.04	0.066	-0.773944	0.793851
isoform_101620	0	1.02	0	0	0.63	0	0.34	0.21	0.159922	0.964372
isoform_101621	42.08	31.04	45.52	0.11	0	3.82	39.546	1.31	2.71746	0.0789594
isoform_101623	13.53	7.78	7.02	1.79	2.67	2.76	9.443	2.406	1.78744	0.00112091
isoform_101625	0	0	0	0.1	0	0.45	0	0.183	-1.52229	0.538301
isoform_101626	1.82	0.01	0	0	0	0	0.61	0	1.03588	0.729342
isoform_101628	0	0	0.99	0	0	0	0.33	0	0.93836	0.750386
isoform_10163	14.04	14.87	15.41	8.44	8.36	14.44	14.773	10.413	0.358212	0.513812
isoform_101631	0.28	2.52	2.5	1.8	1.7	3.09	1.766	2.196	-0.373381	0.850485
isoform_101634	0	0	0.24	0	0	0	0.08	0	0.615974	0.793851
isoform_101636	8.38	8.94	8.44	3.32	4.47	5.3	8.586	4.363	0.827618	0.0214425
isoform_101637	0.83	0.15	0.96	0.62	1.41	1.05	0.646	1.026	-0.694659	0.793851
isoform_10164	0	0.03	0	0.13	0.06	0.05	0.01	0.08	-1.89869	0.33072
isoform_101640	0.34	0.35	0	0.47	0.17	0.47	0.23	0.37	-0.478719	0.84912
isoform_101641	0	0	0	0	0	0.26	0	0.086	-0.640986	0.793851
isoform_101642	0	0.26	0.52	0	0	0.25	0.26	0.083	0.669253	0.793851
isoform_101643	0.76	0.88	0.65	2.19	0.96	1.97	0.763	1.706	-1.18109	0.276273
isoform_101645	22.99	24.48	16.58	11	20.55	6.86	21.35	12.803	0.565154	0.625159
isoform_101646	0.22	0.45	0.16	0.21	0	0	0.276	0.07	0.952397	0.78477
isoform_101647	1.73	2.08	1.78	2.23	0.89	1.67	1.863	1.596	0.0443658	0.995877
isoform_101648	0.22	0.26	0.2	0.22	0	0.43	0.226	0.216	-0.236063	0.942033
isoform_101649	10.36	8.46	14.05	0.8	0.71	1.71	10.956	1.073	3.05564	4.09202e-10
isoform_10165	5.94	0	4.06	6.36	3.02	4.34	3.333	4.573	-0.361693	0.907356
isoform_101650	6.34	9.41	7.85	13.08	13.05	17.1	7.866	14.41	-1.01455	0.000605996
isoform_101651	27.16	28.54	24.15	11.36	14.37	10.3	26.616	12.01	0.988667	4.18577e-05
isoform_101652	0	0.29	0	1.15	1.04	1.85	0.096	1.346	-3.26125	0.00359864
isoform_101653	3.69	3.91	7.83	2.95	4.68	6.66	5.143	4.763	-0.0354829	0.995877
isoform_101654	1.77	5.46	2.16	0.44	3.08	2.36	3.13	1.96	0.498189	0.793851
isoform_101655	0.17	0	0	0	0.48	0.15	0.056	0.21	-0.97501	0.783696
isoform_101658	24.05	25.15	20.11	23.95	21.46	25	23.103	23.47	-0.176987	0.750386
isoform_101659	0	0.11	0.13	0	0	0	0.08	0	0.449952	0.793851
isoform_10166	3.12	0	0	3.49	5.63	2.07	1.04	3.73	-0.740445	0.793851
isoform_101664	0	0.19	0.59	0.59	0.18	0.21	0.26	0.326	-0.351934	0.907281
isoform_101665	1.58	0.79	0.74	1.82	0.84	1.28	1.036	1.313	-0.462732	0.793851
isoform_101666	6.78	0	2.53	1.9	5.06	1.26	3.103	2.74	0.0445244	0.995877
isoform_101669	0	2.82	0	1.01	0.94	0.08	0.94	0.676	0.142818	0.976685
isoform_10167	0.07	0.14	0	0.04	0	0.11	0.07	0.05	0.226876	0.949425
isoform_101671	0	0	0	0.62	0	0	0	0.206	-0.895977	0.764138
isoform_101672	0	0	0	0	0	0.29	0	0.096	-0.640986	0.793851
isoform_101673	8.48	9.3	6.35	3.09	5.34	6.61	8.043	5.013	0.530501	0.531893
isoform_101675	0	0.14	0	0	0	0.13	0.046	0.043	-0.0152188	0.995877
isoform_101676	3.01	3.1	2.44	6.08	7.67	4.9	2.85	6.216	-1.26602	0.0064547
isoform_101677	1.55	0.46	0.37	0.28	1.04	0.16	0.793	0.493	0.551327	0.79657
isoform_101678	0	0	0	0	0	0.63	0	0.21	-0.883127	0.764138
isoform_101679	0.16	0	0.15	0	0	0	0.103	0	1.03851	0.734472
isoform_10168	12.93	9.43	12.78	0	0	1.25	11.713	0.416	1.81662	0.396291
isoform_101682	2.35	4.44	4.59	0.96	0.65	1.18	3.793	0.93	1.74106	0.0112917
isoform_101684	0.26	0	0.3	0.33	0	0	0.186	0.11	0.107739	0.989558
isoform_101685	0	0.46	1.56	0.21	0.68	0.5	0.673	0.463	0.341822	0.906941
isoform_101687	0	0	0	0.78	0	0.39	0	0.39	-1.97961	0.315551
isoform_101688	0.88	0.46	1.39	0.5	0.48	0.85	0.91	0.61	0.341868	0.863825
isoform_10169	2.82	2.47	2.03	2.56	4.31	1.61	2.44	2.826	-0.346989	0.793851
isoform_101692	1.55	0	0.65	1.55	2.44	2.14	0.733	2.043	-1.27512	0.55369
isoform_101696	3.33	2.2	3.41	0	0	0	2.98	0	5.09661	1.09427e-06
isoform_101697	244.9	224.08	216.28	66.42	59.61	60.43	228.42	62.153	1.71314	8.16277e-33
isoform_101698	0	0	1	0	0	0	0.333	0	0.93836	0.750386
isoform_101699	0	2.19	0	0	0	0	0.73	0	1.05604	0.725877
isoform_10170	3.68	5.63	11.39	1.49	4.58	3.49	6.9	3.186	0.924321	0.341307
isoform_101700	0	0.11	0.11	0.53	0.64	0.32	0.073	0.496	-2.06172	0.186693
isoform_101701	0	0	0	0.77	0	0.79	0	0.52	-2.21769	0.222644
isoform_101702	9.39	0.22	10.24	7.12	7.4	4.78	6.616	6.433	-0.08518	0.989946
isoform_101703	25.09	24.72	21.36	14.09	21.21	19.27	23.723	18.19	0.23428	0.695199
isoform_101704	0.4	0	0	0	0	0.29	0.133	0.096	0.147991	0.969511
isoform_101705	0.67	0.45	1.12	0.11	0.61	0.67	0.746	0.463	0.483903	0.801548
isoform_101706	0.65	0.45	0.88	1.02	0.18	0.74	0.66	0.646	-0.0918641	0.986505
isoform_101709	1.58	0.95	1.07	0.94	1.48	1.07	1.2	1.163	-0.0410726	0.995877
isoform_10171	0.23	0.34	0	0.19	0.39	0.32	0.19	0.3	-0.534641	0.801805
isoform_101711	0	0	0	1.01	0	0	0	0.336	-0.976728	0.740017
isoform_101714	3.06	4.16	2.32	2.05	2.89	3.54	3.18	2.826	0.0368741	0.994357
isoform_101715	0.14	0	0.97	0	0.59	0	0.37	0.196	0.361214	0.906841
isoform_101719	0	0	0.29	0	0	0	0.096	0	0.615974	0.793851
isoform_101722	0	0	0	0	0	0.18	0	0.06	-0.471476	0.793851
isoform_101724	394.13	602.47	469.1	326.93	174.77	269.8	488.566	257.166	0.739057	0.107728
isoform_101725	0	0	0	0	0	0.43	0	0.143	-0.795416	0.786123
isoform_101730	28.1	29.69	28.66	25.8	21.57	26.19	28.816	24.52	0.0735311	0.863244
isoform_101731	0.32	0.2	0.2	0.64	0	7.42	0.24	2.686	-2.42317	0.143006
isoform_101732	0	0	0.33	0	0	0	0.11	0	0.705161	0.793851
isoform_101733	50.52	19.2	11.98	3.89	12.95	72.29	27.233	29.71	-0.183363	0.943772
isoform_101734	0	0	0	1.07	1.02	0	0	0.696	-2.25189	0.210704
isoform_101735	0.17	0.58	0.19	0	0	0.58	0.313	0.193	0.227283	0.949593
isoform_101736	0	0	0	0	0.07	0.18	0	0.083	-0.471476	0.793851
isoform_101737	0.87	0	0.54	0	0	0	0.47	0	1.98277	0.315089
isoform_101738	0	0	0	0	0	0.16	0	0.053	-0.471476	0.793851
isoform_101739	0	0.11	0	0.32	0.42	0	0.036	0.246	-1.1925	0.725877
isoform_101740	2.03	2.39	2.37	1.7	2.19	2.57	2.263	2.153	-0.0850693	0.951092
isoform_101741	0	0	0	0.89	1.53	1.79	0	1.403	-4.25657	0.00025638
isoform_101742	1.26	0.71	0.82	1.33	2.14	2	0.93	1.823	-1.11623	0.229801
isoform_101743	0.68	0.24	0.41	0.21	0.22	0.21	0.443	0.213	1.20934	0.643361
isoform_101744	0	0.97	0.4	0	0.42	0	0.456	0.14	0.590336	0.815337
isoform_101746	312.31	242.48	261.3	235.06	257.68	295.3	272.03	262.68	-0.0967998	0.793851
isoform_101747	0.94	0	0	0	0	0	0.313	0	0.917628	0.756427
isoform_101748	0.28	0	0	0	0	0	0.093	0	0.620156	0.793851
isoform_10175	0.31	0.36	0.43	0.55	0.67	1.11	0.366	0.776	-1.21521	0.0785749
isoform_101752	0	0.74	0	0	1.81	0	0.246	0.603	-0.360175	0.893563
isoform_101753	4.79	0.73	2.27	0.66	1.79	0.76	2.596	1.07	0.981692	0.674912
isoform_101754	2.51	0	3.63	1.19	0	2.21	2.046	1.133	0.396134	0.896934
isoform_101755	3.96	3.01	2.05	2.39	4.5	2.05	3.006	2.98	-0.113519	0.943772
isoform_101756	0	0.46	0	0.31	0	0	0.153	0.103	0.0615942	0.995877
isoform_101757	0	0	0.14	0	0.09	0	0.046	0.03	0.449952	0.793851
isoform_101758	20.69	12.72	11.53	10.79	7.82	13.47	14.98	10.693	0.324396	0.783764
isoform_101759	0.73	0	0	0	0	0.78	0.243	0.26	-0.0636216	0.995877
isoform_101760	0	1.47	2.17	1.18	1.46	1.45	1.213	1.363	-0.233939	0.935967
isoform_101762	0.36	1.33	0.36	0.84	0.36	0.89	0.683	0.696	-0.149757	0.959775
isoform_101763	0	0	0	0.1	0	0	0	0.033	-0.491608	0.793851
isoform_101764	0.44	0	1.64	0.52	0	0.42	0.693	0.313	0.532451	0.842972
isoform_101765	0.33	0.44	0.54	0.42	0.53	0.42	0.436	0.456	-0.180098	0.939605
isoform_101766	0	0	0	0	0.27	0	0	0.09	-0.64383	0.793851
isoform_101767	2.08	0	0	0	0	0.21	0.693	0.07	0.80219	0.793851
isoform_101769	1.41	0.33	0	0.33	0	1.15	0.58	0.493	0.0730881	0.995877
isoform_10177	0.5	0	8.76	0.02	6.1	4.47	3.086	3.53	-0.0996413	0.990504
isoform_101770	0	0	0	0.14	0.14	0	0	0.093	-1.09774	0.725877
isoform_101774	0	0	0	0.2	1.24	1.03	0	0.823	-3.434	0.0113306
isoform_101775	0.26	0.24	0.57	0.31	0.35	0.44	0.356	0.366	-0.0699648	0.995877
isoform_101776	0.11	0	0	0.21	1.95	2.71	0.036	1.623	-3.32947	0.011195
isoform_101777	0.25	0.3	0.51	0.2	0	0.27	0.353	0.156	0.911359	0.77955
isoform_101778	0	0	0	0.11	0	0.22	0	0.11	-1.30219	0.648569
isoform_101780	0	0	0.49	36.43	18.61	0	0.163	18.346	-1.29529	0.637311
isoform_101781	162.58	144.99	155.99	471	462.72	272.29	154.52	402.003	-1.52	3.31129e-07
isoform_101783	86.59	75.37	137.29	18.87	25.1	42.19	99.75	28.72	1.6115	0.000100862
isoform_101784	2.97	1.67	2.32	1.05	2.88	2.33	2.32	2.086	0.0179917	0.995877
isoform_101786	0	0	0	0	0.15	1.43	0	0.526	-1.84802	0.370009
isoform_101787	0	0	0.16	0	0	0	0.053	0	0.449952	0.793851
isoform_101788	0	0	0	0	0	0.27	0	0.09	-0.640986	0.793851
isoform_101789	0.32	0.2	0.35	0.14	0.31	0.13	0.29	0.193	0.356353	0.897309
isoform_10179	0	0	0.1	0	0	0	0.033	0	0.705161	0.793851
isoform_101791	56.91	4.58	16.5	0.32	0	3.55	25.996	1.29	2.33645	0.172994
isoform_101793	6.84	8.81	9.96	0.79	1.18	1.41	8.536	1.126	2.71429	3.56195e-10
isoform_101794	1.7	0	0	3.05	4.42	1.35	0.566	2.94	-1.51851	0.544418
isoform_101795	0.59	0	0	0.66	1.06	1.25	0.196	0.99	-1.70142	0.397779
isoform_101796	2.64	0	0	4.77	3.63	11.32	0.88	6.573	-1.81872	0.371835
isoform_101797	0	0	0.11	0	0.53	0.11	0.036	0.213	-1.08337	0.750386
isoform_101802	1.2	0.22	0.98	0.1	0.32	0.32	0.8	0.246	1.24831	0.552467
isoform_101805	4.16	3.1	3.12	0.5	0.09	1.35	3.46	0.646	2.00832	0.118179
isoform_101806	0.15	0	0	0	0	0	0.05	0	0.454616	0.793851
isoform_101807	0.15	0	0	0	0	0	0.05	0	0.454616	0.793851
isoform_101809	0.47	0.53	0.73	0.48	0.24	0.33	0.576	0.35	0.451272	0.804221
isoform_101810	52.11	64.96	49.9	34.5	25.96	37.5	55.656	32.653	0.604953	0.0493631
isoform_101811	4.12	6.11	4.59	3.89	4.72	5.08	4.94	4.563	-0.0441758	0.974604
isoform_101812	1.21	1	0.44	0.94	0.43	0.95	0.883	0.773	0.0258666	0.995877
isoform_101814	0	0.68	0	0	0	0.55	0.226	0.183	0.0569489	0.995877
isoform_101815	83.14	89.82	75.18	145.06	108.3	107.43	82.713	120.263	-0.69857	0.0119016
isoform_101819	149.02	110.84	139.83	326.87	290.22	254.29	133.23	290.46	-1.27364	1.96321e-08
isoform_101820	0	0	0	0.1	0.1	0	0	0.066	-1.09774	0.725877
isoform_101821	0	0	0	0.46	1.3	0	0	0.586	-2.19553	0.229687
isoform_101822	0	0	0	0	0	0.53	0	0.176	-0.844156	0.774669
isoform_101823	4.89	3.74	6.43	0	0.11	0.84	5.02	0.316	3.16679	0.00166247
isoform_101824	33.37	17.4	7.15	2.61	7.27	6.62	19.306	5.5	1.55058	0.0767168
isoform_101826	0.58	0.97	1.16	0.74	1.38	1.68	0.903	1.266	-0.622243	0.752736
isoform_101827	0.11	0	0	0	0	0.11	0.036	0.036	-0.0101539	0.995877
isoform_101828	0	0	0	0	0	0.16	0	0.053	-0.471476	0.793851
isoform_101829	7.44	3.16	3.68	7.93	3.54	15.41	4.76	8.96	-0.974473	0.449094
isoform_10183	0	2.7	0	0	0	0.68	0.9	0.226	0.490945	0.835697
isoform_101830	0.43	0.8	0.26	0.57	0.93	0.61	0.496	0.703	-0.609145	0.793851
isoform_101833	0.59	0	0	0	0	0	0.196	0	0.819712	0.783764
isoform_101836	0	0	0	0.11	0	0.25	0	0.12	-1.30219	0.648569
isoform_101838	41.13	29.07	46.94	12.17	22.36	19.45	39.046	17.993	0.963699	0.01044
isoform_10184	0	0.26	0.29	0	0	7.3	0.183	2.433	-0.746502	0.793851
isoform_101840	8.12	3.28	7.06	4.11	2.36	9.83	6.153	5.433	0.0368275	0.995877
isoform_101841	0	0	0	1.6	0	0	0	0.533	-1.06865	0.725877
isoform_101842	7.38	4.45	7.77	2.5	2.72	4.29	6.533	3.17	0.865759	0.196069
isoform_101844	17.53	8.67	26.54	6.71	7.71	15.63	17.58	10.016	0.64011	0.641888
isoform_101845	19.54	13.29	14.67	13.97	20.67	23.55	15.833	19.396	-0.421323	0.487936
isoform_101846	2.87	1.82	4.83	2.23	1.39	2.6	3.173	2.073	0.415768	0.793851
isoform_101847	0	0	0.34	0.71	0	0.39	0.113	0.366	-0.750014	0.793851
isoform_101848	0.35	0	0	0.44	0.34	0.23	0.116	0.336	-1.03274	0.756427
isoform_101849	9.98	5.59	11.02	5.2	4.03	13.03	8.863	7.42	0.11188	0.949957
isoform_10185	0	0.02	0	0	0.99	0	0.006	0.33	-1.21901	0.668047
isoform_101850	0.9	0	0	0	1.61	0.53	0.3	0.713	-0.555531	0.830484
isoform_101851	6.5	5.03	8.93	0	0	0.25	6.82	0.083	5.24099	1.9646e-10
isoform_101852	5.98	4.47	4.93	1.82	0	0	5.126	0.606	1.79034	0.376498
isoform_101853	0	0	0.9	0	3.32	1.2	0.3	1.506	-1.0344	0.764138
isoform_101854	2.99	4.98	2.64	5.61	5.35	3.51	3.536	4.823	-0.580178	0.60201
isoform_101855	3.19	0	2.1	0.99	2.02	3.96	1.763	2.323	-0.357686	0.896796
isoform_101856	0	0.13	0.13	0	0	0	0.086	0	1.03638	0.734472
isoform_101857	0	1.76	0	0	1.35	0.6	0.586	0.65	-0.10781	0.989285
isoform_101859	0	0	0	0	1.5	0	0	0.5	-1.03684	0.729342
isoform_10186	1.35	0.63	1.5	1.2	1.96	1.66	1.16	1.606	-0.589668	0.581446
isoform_101866	8.45	9.05	7.91	6.17	8	12.52	8.47	8.896	-0.198819	0.793851
isoform_101867	0	0	0	0	0.24	0	0	0.08	-0.64383	0.793851
isoform_101869	0	0	0.61	0.67	0	0.17	0.203	0.28	-0.25733	0.938408
isoform_10187	29.35	29.4	41.27	24.58	23.5	26.63	33.34	24.903	0.267882	0.535659
isoform_101870	3.73	3.57	3.16	4.55	5.19	4.53	3.486	4.756	-0.601894	0.261749
isoform_101871	0	0	0	0	0	0.18	0	0.06	-0.471476	0.793851
isoform_101873	10.86	7.63	32	4.23	11.48	1.88	16.83	5.863	1.20649	0.414681
isoform_101878	19.52	11.3	18.13	10.42	14.34	17.12	16.316	13.96	0.0844778	0.931697
isoform_101879	4.89	1.66	4.38	2.29	0.27	2.97	3.643	1.843	0.704243	0.793075
isoform_10188	25.68	16.25	19.79	9.84	16.18	8.85	20.573	11.623	0.670168	0.172332
isoform_101885	0.11	0.11	0	0.21	0.53	0.84	0.073	0.526	-2.05562	0.203423
isoform_101886	0	0.46	0	0	0	0	0.153	0	0.768574	0.793851
isoform_101887	0	0.9	0	5.86	6.17	7.57	0.3	6.533	-3.49707	0.00152189
isoform_101889	0.99	0.11	0.44	0.42	0.32	0.32	0.513	0.353	0.309535	0.905038
isoform_10189	0	0	0	0	0.11	0	0	0.036	-0.797817	0.786123
isoform_101890	1.75	2.52	2.18	6.98	5.02	4.67	2.15	5.556	-1.47206	0.00327247
isoform_101892	0.54	0.81	1.09	1.09	1.12	0.87	0.813	1.026	-0.5298	0.793851
isoform_101893	0.11	0.11	0	0	0.11	0	0.073	0.036	0.364525	0.906203
isoform_101894	3.07	0	0	0.93	0	0	1.023	0.31	0.40666	0.875804
isoform_101895	0.2	0	0	0	0	0	0.066	0	0.454616	0.793851
isoform_101896	0.69	0.33	0.3	0.26	1.05	0.26	0.44	0.523	-0.247989	0.928451
isoform_101897	11.89	10.79	18.21	4.9	7.51	6.89	13.63	6.433	0.924135	0.0357971
isoform_101898	0.34	0	0.25	0.19	0	0	0.196	0.063	0.942357	0.792014
isoform_101899	5.39	4.73	8.82	8.19	5.1	6.94	6.313	6.743	-0.254592	0.793851
isoform_1019	0.84	1.13	1.05	1.14	1.09	1.16	1.006	1.13	-0.310066	0.654537
isoform_101900	2.38	1.62	2.29	1.89	2.51	2.66	2.096	2.353	-0.336207	0.793851
isoform_101902	4.82	6.68	8.37	5.58	6.62	7.83	6.623	6.676	-0.157411	0.83743
isoform_101904	0.46	0	1.04	0.21	0.22	0.31	0.5	0.246	1.04233	0.74871
isoform_101905	10.41	7.73	12.72	7.15	4.5	14.68	10.286	8.776	0.0797197	0.965212
isoform_101907	0	0	0	0	0.2	0.36	0	0.186	-1.42765	0.586986
isoform_101908	0	0	0.27	0.97	0.8	0.86	0.09	0.876	-2.55458	0.0561112
isoform_101909	4.76	3.41	5.89	1.23	1.57	3.3	4.686	2.033	0.999618	0.254706
isoform_10191	0.03	0.06	0.09	0	0.06	0.06	0.06	0.04	0.349721	0.90571
isoform_101910	0	1.89	3.01	0	0	0	1.633	0	2.5743	0.119106
isoform_101911	1.34	3.59	1.01	3.36	0.67	1.75	1.98	1.926	-0.130976	0.963877
isoform_101912	0	2.99	0	0	0	0	0.996	0	1.13401	0.701601
isoform_101916	2.36	0	1.05	7.66	3.1	1.3	1.136	4.02	-1.49091	0.480622
isoform_101917	4.63	4.36	4.05	2.57	5.97	2.28	4.346	3.606	0.119413	0.937455
isoform_101919	24.56	10.14	21.12	5.76	13.15	19.02	18.606	12.643	0.41659	0.793851
isoform_10192	0.96	1.78	0	2.75	3.27	1.52	0.913	2.513	-1.21792	0.629193
isoform_101920	5.06	8.01	5.31	10.41	8.45	10.18	6.126	9.68	-0.809728	0.0585124
isoform_101921	25.33	29.51	28.32	5.3	3.05	5.04	27.72	4.463	2.43521	2.66202e-18
isoform_101922	38.83	42.29	45.53	22.43	31.35	47.32	42.216	33.7	0.185238	0.793851
isoform_101923	0	0	0.93	0	0	0	0.31	0	0.914796	0.756427
isoform_101925	0	0	0	0.54	0	0	0	0.18	-0.857766	0.773636
isoform_101926	2.5	6.24	6.31	6.8	2.22	3.35	5.016	4.123	0.083834	0.975832
isoform_101928	0.33	0	0	0.97	0	0	0.11	0.323	-0.635513	0.793851
isoform_101929	0	0	0	4.7	0	0.09	0	1.596	-1.19245	0.674912
isoform_10193	2.02	2.06	1.58	2.16	1.94	2.03	1.886	2.043	-0.258208	0.734472
isoform_101930	1.59	0	0	0	0	0	0.53	0	1.02366	0.733439
isoform_101932	2.73	1.66	4.75	6.12	7.38	11.92	3.046	8.473	-1.54365	0.0180007
isoform_101934	0	0	0	0	0.12	0	0	0.04	-0.474775	0.793851
isoform_101935	1.21	0.11	1.1	1.89	2.34	2.74	0.806	2.323	-1.45322	0.239748
isoform_101937	0.25	0	0.17	0	0	0	0.14	0	1.24221	0.674912
isoform_101938	4.88	0	0	0	20.4	0	1.626	6.8	-0.485756	0.829421
isoform_101939	0	0.33	0.11	0.2	0	0	0.146	0.066	0.757183	0.793851
isoform_10194	8.35	9.51	5.68	0.24	0.6	1.23	7.846	0.69	3.21001	2.7339e-09
isoform_101940	2.47	1.23	0	0	0	0	1.233	0	2.53435	0.128566
isoform_101941	0.71	0	0.69	0.14	0	0.39	0.466	0.176	0.855569	0.793851
isoform_101943	0	0	0	1.73	1.01	3.03	0	1.923	-4.53765	6.52756e-05
isoform_101944	32.27	26.61	26.4	11.94	14.58	17.4	28.426	14.64	0.807572	0.000682763
isoform_101945	0	0.16	0	0	0	19.23	0.053	6.41	-0.908983	0.757039
isoform_101947	4.29	3.1	2.54	4.09	2.88	1.69	3.31	2.886	0.0396007	0.995877
isoform_101948	0	0.44	0	0	0	0	0.146	0	0.768574	0.793851
isoform_101949	0	0.26	0	0	0	0	0.086	0	0.616677	0.793851
isoform_10195	11.13	4.38	0.58	7.67	7.82	17.4	5.363	10.963	-0.98976	0.621063
isoform_101952	0	0	0	0	2.08	0	0	0.693	-1.06219	0.725877
isoform_101953	1.2	0	0.44	0	0	0	0.546	0	2.07458	0.276273
isoform_101954	0	0	0	0	0	0.17	0	0.056	-0.471476	0.793851
isoform_101956	2.55	5.05	9.87	0.42	2.35	7.44	5.823	3.403	0.54308	0.793851
isoform_101957	8	0	5.83	26.13	5.66	0	4.61	10.596	-0.519499	0.842341
isoform_10196	4.26	3.88	5.8	7.07	8.23	6.86	4.646	7.386	-0.812409	0.00212992
isoform_101961	5.39	4.68	0	0	0	0	3.356	0	2.9009	0.0598241
isoform_101962	5.01	2.34	4.93	0.18	0.19	1.47	4.093	0.613	2.21112	0.0776404
isoform_101963	19.85	14.09	19.06	7.85	12.82	14.61	17.666	11.76	0.445171	0.508119
isoform_101964	8.93	7.07	11.33	1.58	3.11	2.41	9.11	2.366	1.7594	7.26166e-05
isoform_101967	0	0	0	1.27	0.83	0.48	0	0.86	-3.54534	0.00705923
isoform_10197	0.03	0	0.07	0.04	0.04	0.05	0.033	0.043	-0.057571	0.995877
isoform_101971	0	0.19	0	0.12	0.13	0.13	0.063	0.126	-0.833721	0.793851
isoform_101975	0.79	0	0.67	0	0.11	0	0.486	0.036	1.62806	0.502533
isoform_101976	0.39	0.34	0.39	0.83	0	0.33	0.373	0.386	-0.299259	0.919833
isoform_101977	10.76	8.17	0	8.37	0	16.46	6.31	8.276	-0.206343	0.954489
isoform_10198	0	0.08	0	0	0	0	0.026	0	0.705766	0.793851
isoform_101980	21.24	18.42	17.6	6.41	12.54	10.34	19.086	9.763	0.815712	0.0404258
isoform_101981	0.73	0.9	1.47	0.68	0.35	0.31	1.033	0.446	1.01265	0.602997
isoform_101982	0	0	0.34	0.4	0	0	0.113	0.133	-0.0490877	0.995877
isoform_101983	0.33	0.11	0.33	0.21	0.21	0.32	0.256	0.246	-0.0684374	0.995877
isoform_101984	0	0	0	0	0.13	0	0	0.043	-0.474775	0.793851
isoform_101986	0.68	0.93	0	0	1.14	0	0.536	0.38	0.127142	0.983044
isoform_101987	0.24	0.29	0.34	0	0	0	0.29	0	2.27424	0.202542
isoform_101990	1.33	0	0	0	0	0	0.443	0	0.995852	0.734472
isoform_101991	0.44	0.78	0.88	0.21	0.75	0.85	0.7	0.603	0.072195	0.991043
isoform_101992	0.42	0	0	0	0	0	0.14	0	0.708866	0.793851
isoform_101995	0	0	0	0.52	0	0	0	0.173	-0.857766	0.773636
isoform_101996	5.58	2.25	6.08	2.38	2.92	0.62	4.636	1.973	0.977271	0.557676
isoform_102	6.47	6.29	7.17	5.69	7.73	7.67	6.643	7.03	-0.222392	0.446819
isoform_1020	0.65	0.87	0.32	0.91	1.49	0	0.613	0.8	-0.392238	0.884252
isoform_10200	0.15	0.58	0.15	0.42	0.51	0.13	0.293	0.353	-0.417414	0.833637
isoform_102000	0	0	0.14	1.22	1.82	0	0.046	1.013	-2.19435	0.231052
isoform_102001	1.96	1.33	1.38	0	0.64	0.97	1.556	0.536	1.15141	0.600265
isoform_102003	0.34	0.49	0.53	0.44	0.43	0.53	0.453	0.466	-0.286119	0.892202
isoform_102007	2.85	4.96	2.2	1.02	0	3.62	3.336	1.546	0.716229	0.793851
isoform_102008	5.15	6.34	7.65	4.5	5.38	3.58	6.38	4.486	0.354406	0.734472
isoform_102009	0.9	0.66	1.8	0.39	0.93	0.78	1.12	0.7	0.574601	0.793851
isoform_10201	0	0	0.01	0	0	0	0.003	0	NA	NA
isoform_102015	0	0	0.48	0.36	1.24	0.46	0.16	0.686	-1.4038	0.599097
isoform_102016	20.72	26.9	33.11	12.9	21.46	22.94	26.91	19.1	0.348285	0.650825
isoform_102017	0	0	0	0.62	1.51	3.03	0	1.72	-4.16031	0.000584411
isoform_102018	0	0	0	0	0.13	0	0	0.043	-0.474775	0.793851
isoform_102019	0	0	0	0	1.32	0	0	0.44	-1.02242	0.733439
isoform_102020	0	2.25	3.56	1.37	3.07	0.17	1.936	1.536	0.112689	0.986908
isoform_102021	0	0.38	0.11	0	0.24	0	0.163	0.08	0.386345	0.900018
isoform_102023	0	0	0.33	0	0.3	0.71	0.11	0.336	-0.898883	0.793851
isoform_102024	0.17	0	0	0.52	0.18	0.17	0.056	0.29	-1.40739	0.622631
isoform_102025	3.2	2.93	0	3.75	3.47	0.97	2.043	2.73	-0.432576	0.867365
isoform_102026	0	0	0	2.12	4.71	4	0	3.61	-5.40157	1.16347e-07
isoform_102027	0.62	1.98	0	1.1	0.67	0	0.866	0.59	0.244978	0.943772
isoform_10203	5.5	5.05	5.21	4.88	2.6	5.73	5.253	4.403	0.0958553	0.92555
isoform_102031	0	0.65	0.67	0.99	0.57	0.98	0.44	0.846	-0.929687	0.739185
isoform_102032	0	0	0	0	0	0.25	0	0.083	-0.640986	0.793851
isoform_102033	13.06	4.34	7.76	5.15	1.65	5.51	8.386	4.103	0.805368	0.61857
isoform_102034	8.04	5.99	5.32	16	8.11	4.29	6.45	9.466	-0.687557	0.654283
isoform_102035	4.22	6.34	4.79	1.07	6.19	1.34	5.116	2.866	0.628673	0.782475
isoform_102038	1.44	0.39	1.64	0.99	0.53	0.35	1.156	0.623	0.628556	0.793851
isoform_102041	5.22	4.78	5.52	5.55	5.6	5.34	5.173	5.496	-0.228149	0.793851
isoform_102042	0	0.66	0	0	3.52	0	0.22	1.173	-0.63344	0.793851
isoform_102043	0	0	0.13	0	0	0	0.043	0	0.449952	0.793851
isoform_102044	3.69	0	2.16	1.24	2.64	4.08	1.95	2.653	-0.399505	0.879804
isoform_102045	27.39	28.07	35.36	7.4	9.98	13.33	30.273	10.236	1.40607	2.97732e-07
isoform_102046	1.3	0	0.75	0.83	0	1.15	0.683	0.66	-0.0954601	0.993478
isoform_102047	1.61	0.69	0.7	0.5	0.29	0.85	1	0.546	0.779097	0.749461
isoform_10205	0	0	0	0.02	0	0	0	0.006	-0.491608	0.793851
isoform_102052	17.1	5	3.89	4.03	7.86	9.34	8.663	7.076	0.153218	0.938268
isoform_102053	0	1.48	1.47	0	0.44	0	0.983	0.146	1.3011	0.677178
isoform_102055	25.71	20.04	30.21	18.48	28.73	27.01	25.32	24.74	-0.107548	0.867176
isoform_102056	1.09	0	1.08	2.06	2.16	0.97	0.723	1.73	-1.18263	0.616036
isoform_102057	0	0	0.44	0	0.47	0	0.146	0.156	-0.130217	0.976278
isoform_102059	0	4.05	3.71	0	4.06	3.57	2.586	2.543	-0.0559662	0.995877
isoform_10206	1.53	1	1.19	0.29	0.58	0.56	1.24	0.476	1.19778	0.0363743
isoform_102061	2.14	0.55	1.08	0.52	0	0.49	1.256	0.336	1.41032	0.483896
isoform_102062	0	0	0	0	0.39	0	0	0.13	-0.734223	0.793851
isoform_102063	3.77	10.27	9.82	4.33	3.43	1.76	7.953	3.173	1.07338	0.274476
isoform_102065	1.87	2.3	5.15	0	0	0	3.106	0	4.97245	4.32693e-06
isoform_102066	4.8	1.65	2.34	17.67	18.07	23.32	2.93	19.686	-2.80251	2.03023e-09
isoform_102067	3.3	2.13	0.91	0	0	2.07	2.113	0.69	0.88714	0.793851
isoform_102068	2.64	3.19	2.94	0.94	1.87	1.87	2.923	1.56	0.771985	0.40086
isoform_102069	0	0.76	0	1.35	0	0.76	0.253	0.703	-0.723077	0.793851
isoform_10207	6.89	5.51	6.58	7.23	7.68	7.96	6.326	7.623	-0.414564	0.0482348
isoform_102070	1.63	3.9	2.44	4.49	3.33	4.31	2.656	4.043	-0.733886	0.457993
isoform_102072	31.8	23.47	28.56	31.44	23.04	27.69	27.943	27.39	-0.129618	0.818466
isoform_102073	0	0.72	0.84	0	0	0.79	0.52	0.263	0.400133	0.894416
isoform_102077	0.06	0.21	0	0.34	0.27	1.06	0.09	0.556	-2.32777	0.157188
isoform_102078	0	0	0	0	2.13	0	0	0.71	-1.08374	0.722992
isoform_10208	3.89	3.68	1.62	11.49	12.55	7.71	3.063	10.583	-1.8796	3.35244e-05
isoform_102080	10.05	8.3	11.81	5.27	4.72	5.94	10.053	5.31	0.755688	0.0478807
isoform_102081	12.33	17.89	6.72	349.12	206.18	238.97	12.313	264.756	-4.43992	6.60203e-27
isoform_102083	0.14	0.13	0.5	0	0	0	0.256	0	1.98477	0.317959
isoform_102085	0.82	1.3	1.65	1.91	2.39	3.62	1.256	2.64	-1.13867	0.179055
isoform_102086	0.59	1.13	3.35	0	0	0	1.69	0	3.93587	0.00170521
isoform_102087	0	0	0.21	0.31	0	0.22	0.07	0.176	-0.907328	0.793851
isoform_102089	2.73	2.43	2.19	1.25	1.69	2.42	2.45	1.786	0.296241	0.793851
isoform_10209	31.89	34.19	27.85	38.3	36.86	39.33	31.31	38.163	-0.435078	0.00718484
isoform_102090	0	0	4.82	5.98	1.61	0	1.606	2.53	-0.346376	0.911658
isoform_102092	0	0	0	3.17	0	0.92	0	1.363	-2.60893	0.111374
isoform_102093	1.24	0.9	0	5.55	2.52	2.41	0.713	3.493	-2.01538	0.135247
isoform_102095	19.74	16.04	10	19.25	18.13	20.09	15.26	19.156	-0.46724	0.483229
isoform_102098	0.22	0	0	0	0.11	0.29	0.073	0.133	-0.262891	0.937455
isoform_102099	0.23	0.64	0.24	0.57	0	0.71	0.37	0.426	-0.278801	0.927009
isoform_1021	0.37	0.26	0.12	0.07	0.18	0.3	0.25	0.183	0.325012	0.866549
isoform_10210	8.21	10.02	9.03	10.19	15.43	11.17	9.086	12.263	-0.574623	0.0282566
isoform_102100	18.28	44.64	43.78	41.72	54.26	56.78	35.566	50.92	-0.654162	0.315387
isoform_102101	2.67	1.33	0.46	0.53	1.14	0.7	1.486	0.79	0.735516	0.776079
isoform_102102	0.11	0	0.11	0	0.11	0	0.073	0.036	0.36387	0.906203
isoform_102103	0	0	1.63	0	0.86	0.74	0.543	0.533	-0.0259705	0.995877
isoform_102104	1.39	1.04	2.55	0	0	0	1.66	0	4.22949	0.000323412
isoform_102105	6.84	13.77	23.63	13.09	14	3.57	14.746	10.22	0.321426	0.82977
isoform_102107	0	0	0	0.4	0	0	0	0.133	-0.747003	0.793851
isoform_102108	4.49	2.67	4.04	29.96	30.06	6.79	3.733	22.27	-2.54951	0.000184434
isoform_102109	0	0	0	0	0.24	0	0	0.08	-0.64383	0.793851
isoform_102110	1.19	0.8	0.87	0.78	0.7	0.49	0.953	0.656	0.357508	0.818799
isoform_102111	1.37	0.14	1.63	1.75	2.79	0	1.046	1.513	-0.480344	0.858292
isoform_102112	1.59	18.22	26.44	1.87	0	3.21	15.416	1.693	2.17785	0.157434
isoform_102113	1.31	0	1.47	0	1.69	1.52	0.926	1.07	-0.176428	0.965422
isoform_102114	0	0	0.39	0	0.41	0.37	0.13	0.26	-0.469271	0.870556
isoform_102116	2.7	1.68	5.46	0.08	1.22	0.63	3.28	0.643	1.83202	0.211468
isoform_102118	0	0	0.21	0	0	0	0.07	0	0.449952	0.793851
isoform_102120	0	0.17	0	0	0	0	0.056	0	0.45071	0.793851
isoform_102121	0	0	0.27	0	0.94	0.38	0.09	0.44	-1.11822	0.739185
isoform_102122	0.46	0	0.12	0	0.28	0	0.193	0.093	0.524667	0.84541
isoform_102124	0	0.4	0.66	0	0.49	0.52	0.353	0.336	-0.037639	0.995877
isoform_102125	6.7	0.84	6.75	15.63	8.98	8.97	4.763	11.193	-1.23916	0.349187
isoform_102126	10.98	11.28	11.27	7.05	10.87	14.27	11.176	10.73	-0.0791743	0.930331
isoform_102127	0	1.8	0	0	0.04	0	0.6	0.013	1.04553	0.725877
isoform_102128	0	0.32	0.16	0	0.16	0	0.16	0.053	0.613765	0.803565
isoform_102129	38.73	150.33	38.21	0	1.54	1.83	75.756	1.123	4.19911	0.000244057
isoform_10213	0.82	0.39	0.81	0.39	0.52	0.53	0.673	0.48	0.317118	0.793851
isoform_102130	4.94	4.77	5.4	0.7	0.72	2.51	5.036	1.31	1.71004	0.0360617
isoform_102131	4.33	5.12	3.8	4.3	1.27	0.41	4.416	1.993	0.80095	0.747716
isoform_102132	101.16	72.66	67.59	476.37	326.58	270.6	80.47	357.85	-2.27391	1.61798e-11
isoform_102133	0	0	0	0	0	0.54	0	0.18	-0.844156	0.774669
isoform_102138	0.24	0	0	0	0	0	0.08	0	0.620156	0.793851
isoform_102139	17.05	13.14	19.98	19.27	10.11	14.67	16.723	14.683	0.0185292	0.995877
isoform_10214	0.15	0	0	0	0.06	0	0.05	0.02	0.403324	0.878798
isoform_102141	0	0.62	0.22	0.74	0	0.4	0.28	0.38	-0.284338	0.933349
isoform_102142	1.15	1.89	1.43	0.33	0	0	1.49	0.11	2.93257	0.0136901
isoform_102143	10.41	5.8	9.22	7.72	9.26	1.3	8.476	6.093	0.281432	0.877269
isoform_102144	1.15	0	0	0	0	0	0.383	0	0.961507	0.746597
isoform_102145	0	3.03	0.55	2.09	0	7.92	1.193	3.336	-0.837899	0.793851
isoform_102146	0	0	0	0	0.11	0.74	0	0.283	-1.68853	0.449396
isoform_102147	0.11	0	0	0	0	0.11	0.036	0.036	-0.0101539	0.995877
isoform_102148	7.8	7.55	5.62	5.93	11.2	4.5	6.99	7.21	-0.192628	0.86525
isoform_10215	2.02	3.26	2.7	4.99	3.89	3.85	2.66	4.243	-0.823171	0.0294186
isoform_102150	2.59	2.71	3.15	3.65	3.91	4.36	2.816	3.973	-0.6492	0.248558
isoform_102152	0	0	0	0	0	0.39	0	0.13	-0.731664	0.793851
isoform_102153	0	0.14	0.28	0.13	0.14	0	0.14	0.09	0.245168	0.943772
isoform_102154	0	0	0	0	0.48	0.2	0	0.226	-1.52123	0.538921
isoform_102155	0.14	0	0	0	0	0	0.046	0	0.454616	0.793851
isoform_102156	4.52	5.3	6.55	4	5.38	4.89	5.456	4.756	0.0497769	0.964678
isoform_102158	5.54	1.99	2.41	0.02	5.21	3.71	3.313	2.98	0.0395719	0.995877
isoform_10216	6.55	5.83	5.22	6.65	6.69	7.85	5.866	7.063	-0.415826	0.0775585
isoform_102160	49.16	27	36.65	19.3	19.36	17.54	37.603	18.733	0.842838	0.0251021
isoform_102161	0.34	0	0.11	0.21	0.21	0.21	0.15	0.21	-0.456405	0.86419
isoform_102164	0.83	0.68	0	0	0	0	0.503	0	2.09506	0.268571
isoform_102165	0	0	9.07	0	0	5.46	3.023	1.82	0.17004	0.96094
isoform_102166	0	0.19	0	0.52	0	0.18	0.063	0.233	-1.10437	0.741681
isoform_102169	39.78	38.29	26.37	42.25	34.58	24.65	34.813	33.826	-0.122276	0.886721
isoform_10217	5.15	6.19	9.55	1.14	1.53	1.81	6.963	1.493	2.03314	4.35286e-09
isoform_102171	0	0	0	0	0	0.11	0	0.036	-0.471476	0.793851
isoform_102172	0.74	0.56	1.1	0.42	0.53	1.27	0.8	0.74	-0.0690772	0.991266
isoform_102173	0	0	0	0.27	0.2	0.88	0	0.45	-2.52218	0.129605
isoform_102175	0	0	0.45	0	0	0	0.15	0	0.768003	0.793851
isoform_102176	52.93	72.79	51.21	126.22	122.92	122.72	58.976	123.953	-1.22103	4.30521e-10
isoform_102177	14.88	5.39	13.68	14.77	17.9	13.71	11.316	15.46	-0.574077	0.588971
isoform_102178	1.06	0	3.42	4.31	1.14	0	1.493	1.816	-0.269158	0.936415
isoform_102179	6.7	6.23	7.22	3.3	7.17	6.42	6.716	5.63	0.101009	0.928606
isoform_10218	0	0	0	0	0.05	0	0	0.016	-0.64383	0.793851
isoform_102180	3.55	1.39	5	0.55	0.66	0	3.313	0.403	2.3273	0.0543894
isoform_102183	0.98	1.37	1.16	0.87	1.19	2.49	1.17	1.516	-0.467687	0.793851
isoform_102184	0	0	0	0.57	0.27	0.55	0	0.463	-2.88699	0.0554355
isoform_102185	0.97	0.22	0.58	0	0.94	0.82	0.59	0.586	-0.130804	0.978445
isoform_102187	12.88	4.84	6.75	6.66	1.85	8.55	8.156	5.686	0.33681	0.825874
isoform_102188	0.54	0.43	0.49	0.42	0.41	0.78	0.486	0.536	-0.370237	0.85125
isoform_102190	0	0	0.13	0	0	0.13	0.043	0.043	-0.016198	0.995877
isoform_102191	0	0	0	0.64	0	0	0	0.213	-0.857766	0.773636
isoform_102194	0	1.75	0	0	0	1.1	0.583	0.366	0.14063	0.971955
isoform_102197	6.9	4.85	1.78	4.7	8.27	5.16	4.51	6.043	-0.524297	0.765722
isoform_102198	1.84	1.02	0	0	0	0.8	0.953	0.266	0.780633	0.793851
isoform_102199	18.98	9.97	18.06	5.72	11.41	9.06	15.67	8.73	0.685081	0.366974
isoform_10220	0.05	0.05	0.02	0	0.05	0.02	0.04	0.023	0.434606	0.8771
isoform_102202	14.7	5.53	12.74	1.64	5.05	1.94	10.99	2.876	1.66964	0.0389079
isoform_102203	162.77	98.39	129.34	82.92	107.78	109.65	130.166	100.116	0.232469	0.750386
isoform_102205	8.7	6.97	10.79	15.94	15.43	9.56	8.82	13.643	-0.776753	0.148207
isoform_102207	5.9	2.51	1.99	1.31	1.46	2.4	3.466	1.723	0.804167	0.607577
isoform_102208	0	1.7	0.36	0	0	0.03	0.686	0.01	2.09297	0.268035
isoform_102209	0	3.37	1.24	0	0	0	1.536	0	2.59096	0.115277
isoform_10221	6.73	7.39	7	4.49	4.92	4.26	7.04	4.556	0.477291	0.00885171
isoform_102212	2.72	0	4.71	0.57	1.65	0.71	2.476	0.976	0.899738	0.783764
isoform_102214	1.98	1.92	1.64	1.87	1.43	0	1.846	1.1	0.442665	0.85103
isoform_102216	0.33	0.4	0.04	0	0	0	0.256	0	1.6626	0.468761
isoform_102217	29.65	22.83	26.8	24.86	24.21	17.54	26.426	22.203	0.0895596	0.899122
isoform_102219	18.57	12.27	12.61	12.21	12.13	18.69	14.483	14.343	-0.125349	0.87901
isoform_10222	2.75	1.86	2.96	1.25	1.1	0	2.523	0.783	1.15783	0.652517
isoform_102222	6.17	14.12	11.36	28.07	19.52	19.85	10.55	22.48	-1.22479	0.0119229
isoform_102224	0	0	0	0	0	1.71	0	0.57	-1.06091	0.725877
isoform_102227	2.87	2.49	3.42	1.02	0	2.2	2.926	1.073	1.04193	0.703373
isoform_10223	0.55	0.97	0.86	0.46	1	0.6	0.793	0.686	0.0607282	0.979076
isoform_102231	0.4	0.43	0.88	0	2.04	0.85	0.57	0.963	-0.775815	0.793851
isoform_102232	0	0	0.71	1.87	0	0	0.236	0.623	-0.434453	0.863878
isoform_102233	0	0	0	0	0	0.11	0	0.036	-0.471476	0.793851
isoform_102234	1.34	1.85	2.53	0	0.15	0	1.906	0.05	3.96868	0.000186105
isoform_102235	3.8	3.22	2.99	8.26	8.21	7.11	3.336	7.86	-1.36825	0.000815235
isoform_102237	2.54	3.07	1.12	0.78	0	0	2.243	0.26	1.97219	0.266158
isoform_102238	0	0	0	0	0	0.1	0	0.033	NA	NA
isoform_102239	2.76	0	2.17	2.08	3.02	0.92	1.643	2.006	-0.297479	0.917537
isoform_10224	0.11	0.1	0.1	0	0	0	0.103	0	2.65402	0.095125
isoform_102241	0.51	0	1.3	0.85	0	0.15	0.603	0.333	0.297467	0.929792
isoform_102242	5.55	2.24	4.78	1.75	3.08	5.55	4.19	3.46	0.153537	0.932651
isoform_102243	0.12	0	0	0.11	0.11	0	0.04	0.073	-0.433316	0.880983
isoform_102244	32.84	10.73	4.23	0	9.42	6.21	15.933	5.21	1.07562	0.725877
isoform_102246	1.65	2.55	1.56	2.65	3.27	3.27	1.92	3.063	-0.823468	0.254025
isoform_102247	10.83	3.06	22.31	4.47	6.14	2.94	12.066	4.516	1.13985	0.388659
isoform_102249	1.47	2.36	0.9	2.95	1.31	2.85	1.576	2.37	-0.68985	0.713246
isoform_10225	2.46	3.3	0.03	2.81	2.44	0.89	1.93	2.046	-0.19681	0.94859
isoform_102250	0	0	0	0	0.19	0.19	0	0.126	-1.08706	0.725877
isoform_102251	0	0.65	0	0	0	2.56	0.216	0.853	-0.539605	0.811249
isoform_102254	497.95	547.91	486.97	123.38	140.11	120.11	510.943	127.866	1.83923	6.64833e-62
isoform_102255	0.64	1.12	0.23	0.7	0.88	0.75	0.663	0.776	-0.416473	0.809603
isoform_102257	0	0	0	0	0	0.18	0	0.06	-0.471476	0.793851
isoform_102259	8.44	0	0.49	2.18	2.19	4.47	2.976	2.946	-0.0629889	0.995877
isoform_10226	2.15	3.02	2.51	2	2.09	1.89	2.56	1.993	0.208309	0.783764
isoform_102261	4.95	4.04	5.95	3.68	1.92	2.86	4.98	2.82	0.62533	0.515363
isoform_102262	24.72	24.1	39.57	9.29	20.05	21.48	29.463	16.94	0.642853	0.356969
isoform_102263	1.36	1.99	1.6	0	0.86	0.44	1.65	0.433	1.44473	0.37675
isoform_102264	0	0	0	0.17	0	0	0	0.056	-0.491608	0.793851
isoform_102265	0.19	0	0	1.49	0.91	0.44	0.063	0.946	-3.07498	0.019248
isoform_102267	12.57	6.21	8.08	7.13	8.95	4.62	8.953	6.9	0.217867	0.840651
isoform_102268	0	0	0	0.31	0.79	0.99	0	0.696	-3.21751	0.0223254
isoform_102269	79.04	54.77	48.36	6.61	2.39	10.94	60.723	6.646	2.87003	2.1927e-07
isoform_10227	1.3	1.06	0.67	1.22	1.76	0.75	1.01	1.243	-0.430284	0.783764
isoform_102270	4.36	1.44	2.97	0	0	0.37	2.923	0.123	3.5088	0.00127195
isoform_102272	0.32	0.3	0.46	0.17	0	0	0.36	0.056	1.66178	0.457368
isoform_102274	9.74	9.96	11.56	10.49	11.62	14.24	10.42	12.116	-0.364105	0.362687
isoform_102275	39.25	51.48	7.14	89.43	78.1	38.29	32.623	68.606	-1.13068	0.336286
isoform_102276	0	0	0.49	0	0	0	0.163	0	0.768003	0.793851
isoform_102277	0	0	0	0	0	0.11	0	0.036	-0.471476	0.793851
isoform_102279	5.17	2.97	0	3.71	5.25	0	2.713	2.986	-0.157091	0.972627
isoform_102282	1.26	2.06	2.36	0.75	0	3.5	1.893	1.416	0.206743	0.949289
isoform_102284	0.22	0	0.33	0.31	0.21	0.32	0.183	0.28	-0.559573	0.801764
isoform_102286	16.9	9.56	7.36	2.59	0	0	11.273	0.863	2.1717	0.20872
isoform_102288	14.4	11.36	11.95	6.87	9.94	7.48	12.57	8.096	0.483327	0.264057
isoform_102289	5.97	3	3.68	1.36	2.27	3.37	4.216	2.333	0.701176	0.59628
isoform_102291	12.06	15.03	16.68	0	0.96	3.96	14.59	1.64	2.41209	0.050828
isoform_102292	0.11	0	0.11	0.1	0	0.21	0.073	0.103	-0.352095	0.912724
isoform_102294	34.01	23.46	22.89	20.58	30.58	25.01	26.786	25.39	-0.068549	0.931697
isoform_102295	8.06	6.25	5.98	2.22	6	3.83	6.763	4.016	0.593001	0.570371
isoform_102296	1.24	1.72	0.51	1.53	2.49	2.38	1.156	2.133	-0.965829	0.45492
isoform_102297	0	0.32	0	0	0	0	0.106	0	0.616677	0.793851
isoform_102299	0.11	0.11	0	0	0.11	0	0.073	0.036	0.364525	0.906203
isoform_1023	5.12	3.37	5.9	8.61	6.82	8.41	4.796	7.946	-0.867207	0.0134864
isoform_102300	0.69	0.15	0	0.26	0	0.53	0.28	0.263	-0.0360168	0.995877
isoform_102303	0.95	1.05	1.79	0.42	0.78	0.69	1.263	0.63	0.781018	0.677493
isoform_102304	0.3	0.53	2.06	0.47	0.76	2.09	0.963	1.106	-0.31042	0.905305
isoform_102305	0	0	0	0	0	0.12	0	0.04	-0.471476	0.793851
isoform_102307	0	5.34	1.53	0	0	0	2.29	0	2.72334	0.08814
isoform_102308	0.2	0	0	0	0.49	0.24	0.066	0.243	-1.1492	0.734472
isoform_102309	0	1.24	0	0	0	0	0.413	0	0.97761	0.740017
isoform_10231	6.27	7.49	6.36	4.91	6.74	6.09	6.706	5.913	0.0364451	0.943742
isoform_102312	25.13	24.33	25.81	28.61	28.28	31.85	25.09	29.58	-0.389279	0.0261548
isoform_102313	0	0.37	1.28	1.61	3.21	0.77	0.55	1.863	-1.46751	0.480618
isoform_102314	0	0	0	0.11	0	0.21	0	0.106	-1.30219	0.648569
isoform_102315	1.14	0.47	2.77	1.57	1.01	1.04	1.46	1.206	0.11127	0.971955
isoform_10232	0	0	3.46	7.37	4.83	7.66	1.153	6.62	-0.980811	0.774669
isoform_102320	0.52	0.55	0.88	0.64	0	0.48	0.65	0.373	0.472862	0.834908
isoform_102323	0	0	0.59	0	0	0	0.196	0	0.816362	0.783764
isoform_102324	0	0.08	0	0.28	0	0.29	0.026	0.19	-1.4979	0.553518
isoform_102326	0.54	0	0.86	0.31	0	1.1	0.466	0.47	-0.0414756	0.995877
isoform_102329	1.78	1.46	0	0	1.71	1.74	1.08	1.15	-0.103968	0.990882
isoform_10233	1.82	1.35	2.4	4.42	0.62	0.55	1.856	1.863	-0.192375	0.937452
isoform_102330	2.51	13.51	9.63	35.18	2.61	6.34	8.55	14.71	-0.828494	0.756427
isoform_102331	4.07	14.66	1.65	0	4.13	1.33	6.793	1.82	1.25101	0.64983
isoform_102332	13.83	13.1	28.82	21.64	14.85	20.45	18.583	18.98	-0.188243	0.851349
isoform_102333	6.83	8.47	7.87	6.98	4.01	7.23	7.723	6.073	0.180432	0.832199
isoform_102334	0	0	0.5	0	0	0.48	0.166	0.16	-0.0142781	0.995877
isoform_102335	31.2	29.46	28.46	12.53	21.18	16.54	29.706	16.75	0.679524	0.0126795
isoform_102336	2.73	9.97	5.17	6.63	7.68	2.36	5.956	5.556	-0.067794	0.98688
isoform_102337	0	1.17	0	0	1.67	0	0.39	0.556	-0.170262	0.960604
isoform_102339	0.11	0	0	0	0	0	0.036	0	0.454616	0.793851
isoform_102341	0	0.44	0.42	0	0.91	0	0.286	0.303	-0.109459	0.988887
isoform_102342	0	0	0	0	0	0.85	0	0.283	-0.915411	0.756427
isoform_102343	0	0	0	1.09	0.83	0	0	0.64	-2.34481	0.180281
isoform_102344	0.16	0.16	0.16	0.14	0.7	0	0.16	0.28	-0.781487	0.793851
isoform_102345	5.94	7.19	3.19	3.7	5.64	7.86	5.44	5.733	-0.21521	0.860636
isoform_102346	3.24	2.99	5.21	3.68	1.75	3.19	3.813	2.873	0.228333	0.856797
isoform_102347	19.68	11.56	17.26	4.06	1.51	2.8	16.166	2.79	2.28018	1.18344e-05
isoform_102349	1.53	0.84	0	2.69	0	0.86	0.79	1.183	-0.467618	0.871458
isoform_102350	0	0.28	0	0	0	0	0.093	0	0.616677	0.793851
isoform_102352	0.13	0.19	0.11	0	0.34	0.72	0.143	0.353	-1.13825	0.725877
isoform_102353	18.51	7.51	0.93	5.37	19.51	0	8.983	8.293	-0.00730394	0.997202
isoform_102356	31.74	30.69	33.73	54.08	45.91	78.36	32.053	59.45	-1.03035	0.000168224
isoform_102357	0.02	0	0	0.19	0	0	0.006	0.063	-0.491608	0.793851
isoform_102358	2.65	0	0	0.49	2.04	0	0.883	0.843	-0.000247803	0.999933
isoform_10236	0	7.58	0	0	0	0	2.526	0	0.929167	0.750386
isoform_102361	20.87	17.35	27.78	9.52	9.27	14.27	22	11.02	0.833961	0.0375322
isoform_102362	0	0	0	0	0.11	0	0	0.036	-0.474775	0.793851
isoform_102363	11.94	8.88	8.48	11.83	5.33	5.49	9.766	7.55	0.189951	0.877719
isoform_102365	2	1.7	0	0	0.39	0	1.233	0.13	1.50375	0.573472
isoform_102366	4.23	0.52	1.55	2.63	0.18	0.84	2.1	1.216	0.493337	0.832689
isoform_102367	0.11	0.67	0.55	0.95	0.11	0	0.443	0.353	0.060225	0.995877
isoform_102368	0	0	0	0.9	1.65	0	0	0.85	-2.44376	0.151759
isoform_102369	2	0	0	0	0.4	0	0.666	0.133	0.623961	0.793851
isoform_10237	8.58	7.2	7.17	11.53	9.01	6.74	7.65	9.093	-0.405979	0.536617
isoform_102371	41.86	47.89	52.25	37.98	19.15	25.53	47.333	27.553	0.594791	0.311657
isoform_102372	0	0.58	0	0	0	0.4	0.193	0.133	0.182118	0.956744
isoform_102373	0	0	0	0.42	0	0	0	0.14	-0.809985	0.783764
isoform_102375	0	0.27	0.26	0.55	0.91	0.95	0.176	0.803	-2.01022	0.135129
isoform_102376	0.14	0.29	0.28	0.13	0	0.4	0.236	0.176	0.155666	0.970802
isoform_102377	0.26	0.38	0.41	0.13	0.13	0.12	0.35	0.126	0.964138	0.749528
isoform_102378	0.19	0	0	0	0	0	0.063	0	0.454616	0.793851
isoform_102380	0.4	0.13	0.64	0.49	0.14	0	0.39	0.21	0.466931	0.86283
isoform_102381	0	0	0.45	0	0.82	0.36	0.15	0.393	-0.636649	0.794693
isoform_102382	0.48	0	0.64	0.47	1.03	0.65	0.373	0.716	-0.826141	0.783764
isoform_102383	0.11	0	0.11	0	0	0.11	0.073	0.036	0.368711	0.905305
isoform_102384	0.01	0	0.05	0	0.67	0	0.02	0.223	-0.846408	0.774669
isoform_102385	106	77.03	117.98	0.56	0.38	7.4	100.336	2.78	3.78357	0.000691252
isoform_102386	0.43	0.42	0.84	0.3	0.5	0	0.563	0.266	0.85696	0.783764
isoform_102387	0	0.32	0	0.97	0.71	0	0.106	0.56	-1.32396	0.671428
isoform_102388	0	0	2.3	1.13	1.61	0.55	0.766	1.096	-0.326198	0.920442
isoform_102389	65.27	60.19	63.38	59.39	67.03	64.47	62.946	63.63	-0.168589	0.444507
isoform_10239	5.63	8.42	4.78	11.49	12.57	12.99	6.276	12.35	-1.11207	5.92396e-05
isoform_102392	0.63	1.16	1.46	0.63	1.36	1.46	1.083	1.15	-0.208248	0.91301
isoform_102395	0.47	0.51	0	0.65	1.4	1.32	0.326	1.123	-1.49402	0.377756
isoform_102398	0.3	0.78	1.05	0.8	0.07	2.35	0.71	1.073	-0.57749	0.804725
isoform_102399	0	0	0	0.81	0	0	0	0.27	-0.927436	0.753921
isoform_1024	0	0	0	0	0.14	0	0	0.046	-0.944555	0.750386
isoform_10240	3.79	3.26	3.51	3.37	3.55	4.87	3.52	3.93	-0.300902	0.552764
isoform_102401	0	1.89	0	0	0	2.98	0.63	0.993	-0.191508	0.952484
isoform_102402	0	0	0	1.09	0	0	0	0.363	-0.996587	0.734472
isoform_102403	0	0	1.1	0	0	0	0.366	0	0.958968	0.746732
isoform_102404	7.98	6.27	8.21	3.52	4.87	5.44	7.486	4.61	0.550065	0.305997
isoform_102406	13.68	9.72	6.63	10.18	1.97	9.08	10.01	7.076	0.293871	0.854302
isoform_102408	32.13	23.04	23.17	31.62	37.72	30.09	26.113	33.143	-0.48733	0.167761
isoform_10241	1.41	2.31	2.79	1.46	1.86	8.23	2.17	3.85	-0.85398	0.606609
isoform_102410	0	2.57	1.97	0	2.6	0	1.513	0.866	0.264832	0.93612
isoform_102411	20.58	7	31.43	8.5	0	13.78	19.67	7.426	0.746169	0.793851
isoform_102413	0	0	0	0	1.16	0	0	0.386	-0.988294	0.736392
isoform_102416	16.39	19.23	17.05	23.21	26.49	18.75	17.556	22.816	-0.533971	0.0838246
isoform_102418	69.48	155.18	59.66	107.72	57.59	71.34	94.773	78.883	0.0814614	0.958514
isoform_102419	4.77	5.28	7.68	2.81	6.18	5.65	5.91	4.88	0.133577	0.91105
isoform_10242	0	0	0	0.56	0	0	0	0.186	-1.13277	0.701638
isoform_102420	9.16	10.15	9.33	0	0.85	5.26	9.546	2.036	1.60138	0.385163
isoform_102421	5.55	5.36	4.75	3.04	3.65	4.16	5.22	3.616	0.377469	0.673846
isoform_102424	5.41	3.56	8.08	2.22	2.25	4.07	5.683	2.846	0.805537	0.403193
isoform_102425	1.22	0.01	2.61	13.66	41.54	17.81	1.28	24.336	-3.63543	0.000142364
isoform_102428	0	0.11	0.11	0.11	0.32	0.21	0.073	0.213	-1.0677	0.740017
isoform_102429	118.78	112.54	157.83	118.79	144.61	207.43	129.716	156.943	-0.415291	0.384902
isoform_10243	0	0	0.53	0	0.62	0.23	0.176	0.283	-0.312375	0.923935
isoform_102431	0.92	0.51	1.27	0	0.41	0.55	0.9	0.32	1.0525	0.706894
isoform_102432	0	0	0	0	0.19	0	0	0.063	-0.474775	0.793851
isoform_102434	1.11	0.35	0	0.37	0	1.15	0.486	0.506	-0.0896192	0.995833
isoform_102435	3.4	2.45	0.21	0	3.24	6.07	2.02	3.103	-0.478287	0.862276
isoform_102436	0.11	0.11	0.22	0	0	0	0.146	0	1.72638	0.443695
isoform_102439	0	0	0.45	0	0	0.76	0.15	0.253	-0.278148	0.925464
isoform_10244	0.74	0.19	0.71	0.16	0.36	0	0.546	0.173	1.13672	0.679748
isoform_102440	1.79	2.64	1.64	1.74	2.13	1.77	2.023	1.88	-0.0356375	0.995877
isoform_102441	0	0	0.58	1.3	0	2.3	0.193	1.2	-1.22216	0.715571
isoform_102443	173.41	138.74	167.73	126.06	135.2	159.99	159.96	140.416	0.0392925	0.933226
isoform_102444	0	0	0	0.86	0	0.96	0	0.606	-2.28909	0.19845
isoform_102445	0	0	0	0.2	0	0.2	0	0.133	-1.09607	0.725877
isoform_102446	0.23	0.12	0	0	0	0	0.116	0	1.24247	0.674912
isoform_102447	0	0.16	0	0	0	0	0.053	0	0.45071	0.793851
isoform_102448	0	1.41	0.36	0.92	0.49	0	0.59	0.47	0.0959185	0.993449
isoform_102449	0	0.73	0.34	0	0	1.26	0.356	0.42	-0.136951	0.979138
isoform_10245	23.63	25	15.6	17.23	16.23	11.17	21.41	14.876	0.359999	0.658384
isoform_102450	1.64	4.61	3.86	0.44	5.07	1	3.37	2.17	0.433749	0.829301
isoform_102453	6.75	4.55	6.65	2.77	6.55	5.99	5.983	5.103	0.0875922	0.948264
isoform_102454	9.99	8.89	8.55	6.43	7.42	9.12	9.143	7.656	0.104879	0.867578
isoform_102455	46.39	35.89	55.22	37.17	40.31	45.83	45.833	41.103	0.00555579	0.995877
isoform_102457	5.89	4.48	10.51	33.3	11.67	10.71	6.96	18.56	-1.49073	0.0736224
isoform_102458	0	0	0.81	0	2.45	1.72	0.27	1.39	-1.05665	0.756427
isoform_10246	6.34	3.74	3.8	4.74	4.09	4.37	4.626	4.4	-0.0765702	0.935252
isoform_102460	0.64	1.68	2	3.56	2.46	3.59	1.44	3.203	-1.26155	0.161271
isoform_102462	0	0.61	0.7	0	0	0	0.436	0	2.00357	0.306353
isoform_102464	3.04	1.59	1.98	1.39	1.3	0.89	2.203	1.193	0.68497	0.645226
isoform_102465	12.69	16.54	16.42	9.25	26.01	24.27	15.216	19.843	-0.500086	0.637079
isoform_102467	4.24	7.8	6.1	4.72	2.37	4.92	6.046	4.003	0.41135	0.783764
isoform_102468	2.84	3.13	5.96	2.16	3.81	11.49	3.976	5.82	-0.609702	0.774669
isoform_102469	0	0	0.14	0	0	9.04	0.046	3.013	-1.36811	0.606019
isoform_102470	1.55	0.9	1	1.27	0.97	0.85	1.15	1.03	-0.00229736	0.998302
isoform_102471	0	0	0	0	0.11	0	0	0.036	-0.474775	0.793851
isoform_102472	0	0.39	0	0	0	0	0.13	0	0.616677	0.793851
isoform_102476	9.42	9.61	9.19	9.06	10.89	7.12	9.406	9.023	-0.0941849	0.897094
isoform_102477	9.11	13.87	13.16	10.56	6.66	1.91	12.046	6.376	0.664649	0.725877
isoform_102478	0	1.08	0.37	0	0	0.69	0.483	0.23	0.394228	0.89638
isoform_102479	0	0.33	0	0	0.68	0	0.11	0.226	-0.282217	0.924339
isoform_102480	13.18	11.38	11.41	9.88	13.07	13.77	11.99	12.24	-0.181579	0.78477
isoform_102481	0	0	0.11	0.22	0.11	0	0.036	0.11	-0.70315	0.793851
isoform_102482	0	0	0.71	0	0	0	0.236	0	0.816362	0.783764
isoform_102483	0.11	0.22	0	0	0.23	0	0.11	0.076	0.215823	0.952107
isoform_102484	1.01	0	0	0	0.78	0.66	0.336	0.48	-0.232974	0.946497
isoform_102485	0.28	0.28	0	0	0.11	0.12	0.186	0.076	0.508712	0.85457
isoform_102486	1.59	1.08	0	0.23	3.37	0	0.89	1.2	-0.27201	0.935967
isoform_102487	0.18	0.25	0.49	0.8	1.42	0.97	0.306	1.063	-1.81326	0.125473
isoform_102488	0	0.05	0.12	0.77	0	0.48	0.056	0.416	-1.59243	0.524337
isoform_102489	8.01	7.67	6.4	13.7	8.35	9.02	7.36	10.356	-0.650028	0.273273
isoform_102491	4.14	0	3.36	3.03	1.76	3.26	2.5	2.683	-0.173803	0.95957
isoform_102492	0.35	0	0	0	0	0	0.116	0	0.708866	0.793851
isoform_102493	1	3.34	3.84	1.41	0.93	2.67	2.726	1.67	0.522224	0.793851
isoform_102495	0	0	0.54	1.81	0	0	0.18	0.603	-0.578173	0.793851
isoform_102496	4.83	1.28	4.57	0	1.7	2.74	3.56	1.48	0.886058	0.773636
isoform_102499	0	0	0	0	0	5.75	0	1.916	-1.26282	0.64839
isoform_10250	3.59	0	2.37	1.28	0.26	0	1.986	0.513	0.912765	0.793851
isoform_102500	0.33	0.94	1	0.11	0.32	0.42	0.756	0.283	1.01828	0.666869
isoform_102501	0	0	0	0.91	0	0	0	0.303	-0.953963	0.748012
isoform_102502	0	0.03	0	0.02	0	0	0.01	0.006	NA	NA
isoform_102503	0.33	0	0	0.73	0.32	0.63	0.11	0.56	-1.64415	0.436359
isoform_102504	0.03	0	0	0	0.39	0.45	0.01	0.28	-1.73448	0.432224
isoform_102506	0	0.03	0	0	0	0	0.01	0	NA	NA
isoform_102508	0	0	0	0.29	0	0.31	0	0.2	-1.4979	0.553518
isoform_102509	0	0	0	0	0.5	0.61	0	0.37	-2.08566	0.272591
isoform_10251	13.81	15.62	15.18	13.75	14.3	16.3	14.87	14.783	-0.139806	0.613372
isoform_102510	5.88	2.24	3.23	4.12	4.27	3.7	3.783	4.03	-0.202352	0.875198
isoform_102511	0.33	0.11	0.22	0	0.11	0	0.22	0.036	1.36757	0.64178
isoform_102512	0	0	0	0.94	0	0	0	0.313	-0.953963	0.748012
isoform_102514	1.38	0	0	16.74	6.22	16.85	0.46	13.27	-3.66831	0.00153328
isoform_102516	1.35	2.18	0	0	0	0	1.176	0	2.52823	0.129823
isoform_102517	0	0.47	0.85	0	0.97	0.49	0.44	0.486	-0.177581	0.96481
isoform_10252	0.28	0.18	0.13	0.27	0.17	0.2	0.196	0.213	-0.253002	0.895285
isoform_102520	1.1	4.41	0.57	1.17	2.16	2.55	2.026	1.96	-0.090379	0.983917
isoform_102521	0	0	0	0.99	0	0	0	0.33	-0.976728	0.740017
isoform_102522	0	0	0	0	0	0.6	0	0.2	-0.844156	0.774669
isoform_102525	0	0.35	0	0.28	0	0.46	0.116	0.246	-0.472098	0.868995
isoform_102527	0	0	0	0.64	0	0	0	0.213	-0.809985	0.783764
isoform_102529	23.61	21.54	33.31	26.38	29.77	34.72	26.153	30.29	-0.362511	0.452689
isoform_10253	0	0.38	0	0	0	0	0.126	0	1.02191	0.733439
isoform_102530	0	0	3	7.52	5.82	3.37	1	5.57	-1.59923	0.494617
isoform_102532	0	0.23	0	0	0.19	0	0.076	0.063	0.239847	0.935967
isoform_102533	0	2.34	0	0	0	0	0.78	0	1.08417	0.722992
isoform_102534	0	0	0	0.34	0	0.44	0	0.26	-1.82243	0.387866
isoform_102535	0.56	0	0.23	0.52	0	0.11	0.263	0.21	0.0447932	0.995877
isoform_102537	0	0.52	0.74	0.26	0	0	0.42	0.086	0.960571	0.786123
isoform_102538	6.15	0	3.19	0	21.17	17.48	3.113	12.883	-0.805657	0.793851
isoform_102539	4.62	5.65	4.55	2.8	3.22	6.8	4.94	4.273	0.0685662	0.969399
isoform_102541	0	0	0	0	0	0.48	0	0.16	-0.795416	0.786123
isoform_102542	0	0	0.11	0	0	0	0.036	0	0.449952	0.793851
isoform_102544	0	0.31	0.84	0.51	4.97	10.44	0.383	5.306	-2.80948	0.0375326
isoform_102545	0.6	0	0.4	0.43	0.2	0.39	0.333	0.34	-0.302488	0.915731
isoform_102547	0	0.12	0	0	0.25	0	0.04	0.083	-0.279231	0.924492
isoform_102548	134.05	110.3	152.17	28.9	23.69	40.53	132.173	31.04	1.91361	5.98072e-13
isoform_10255	3.45	2.54	3.96	0.69	0	2.79	3.316	1.16	1.01571	0.734472
isoform_102550	2.85	5.79	5.89	12.05	16.09	3.18	4.843	10.44	-1.16411	0.304825
isoform_102552	18.17	14.74	16.75	6.51	6.95	7.37	16.553	6.943	1.10079	8.53563e-06
isoform_102553	0	0.73	0.8	0	0	0.35	0.51	0.116	0.917817	0.793851
isoform_102554	2.07	5.06	0.59	0.94	0.46	0.97	2.573	0.79	1.26728	0.468415
isoform_102556	0	0	0	0	0	0.46	0	0.153	-0.795416	0.786123
isoform_102559	0	0	1.06	0.78	0	0	0.353	0.26	0.0583719	0.995877
isoform_10256	4.01	4.1	3.9	3.78	4.23	2.84	4.003	3.616	-0.00802335	0.995877
isoform_102561	5.13	11.23	5.22	98.48	96.02	97.18	7.193	97.226	-3.83348	9.27593e-31
isoform_102562	0.04	0	8.04	0	3.25	11.23	2.693	4.826	-0.228769	0.937455
isoform_102564	0.03	0	0.44	0.5	0	0	0.156	0.166	-0.0497401	0.995877
isoform_102566	18.1	18.52	28.08	17.28	13.89	7.04	21.566	12.736	0.566663	0.592128
isoform_10257	0.78	0.68	0.63	0.65	0	0.34	0.696	0.33	0.684605	0.793851
isoform_102570	0.93	0.6	0.8	0.57	0.53	0.19	0.776	0.43	0.637773	0.793851
isoform_102573	1.66	3.03	4.16	4.37	1.15	2.26	2.95	2.593	-0.00519827	0.996866
isoform_102575	2.13	0.04	0.35	0.58	0.87	0.21	0.84	0.553	0.306515	0.922804
isoform_102577	0.27	0.28	0.62	0	0.23	0.26	0.39	0.163	0.926252	0.773826
isoform_102578	0	0.16	0	0	0	0	0.053	0	0.45071	0.793851
isoform_102579	0.46	0.26	0.22	1.56	1.38	0.32	0.313	1.086	-1.60318	0.278828
isoform_102581	115.14	126.9	169.86	99.19	96.85	64.49	137.3	86.843	0.487786	0.31935
isoform_102582	0	0	3.5	0	0	0	1.166	0	1.13375	0.701612
isoform_102583	0.66	0	0	0	0.41	0.41	0.22	0.273	-0.126581	0.983324
isoform_102584	0	0.21	0.15	0.83	1.76	2.93	0.12	1.84	-3.51423	0.0012303
isoform_102585	0.38	0.45	0	0.23	0	0.41	0.276	0.213	0.230823	0.947265
isoform_102586	0	1.19	0	0	0.07	0.34	0.396	0.136	0.439372	0.862803
isoform_102589	0	0	0.56	0.43	0	0.99	0.186	0.473	-0.624877	0.800156
isoform_10259	0	0	0	0	0.11	0	0	0.036	-0.797817	0.786123
isoform_102591	53.09	62.98	45.28	28.25	23.04	23.19	53.783	24.826	0.946879	0.000179112
isoform_102592	5.82	6.43	4.9	3.79	5.95	4.81	5.716	4.85	0.0981709	0.917798
isoform_102593	0	0	0	0	0	0.07	0	0.023	-0.471476	0.793851
isoform_102594	0	0	0	0	0	1.69	0	0.563	-1.06091	0.725877
isoform_102596	1.46	1.35	5.04	0.45	1.64	2.06	2.616	1.383	0.749903	0.764138
isoform_102597	23.22	6.69	8.56	2.69	0	1.43	12.823	1.373	2.35753	0.0701097
isoform_102598	1.93	3.77	3.65	3.16	4.35	3.21	3.116	3.573	-0.351351	0.793851
isoform_1026	31.42	27.77	34.53	6.95	9.91	9.01	31.24	8.623	1.70757	2.32178e-25
isoform_10260	7.67	5.64	6.7	1.68	5.81	2.71	6.67	3.4	0.810937	0.315551
isoform_102600	1.95	1.68	2.82	2.09	3.96	5.06	2.15	3.703	-0.883854	0.337704
isoform_102601	1.13	1.35	0	0	0	0	0.826	0	2.37073	0.172392
isoform_102602	12.43	10.05	15.25	6.07	7.03	9.78	12.576	7.626	0.571212	0.261861
isoform_102603	2.54	2.46	1.99	1.69	1.5	0.74	2.33	1.31	0.622631	0.688476
isoform_102605	0	0.19	0	0	0	0	0.063	0	0.45071	0.793851
isoform_102607	1.45	1.04	0.24	2.17	0.68	0.82	0.91	1.223	-0.511007	0.793851
isoform_10261	0.16	0.28	0.19	0.03	0.13	0.04	0.21	0.066	1.32852	0.451804
isoform_102610	0.98	0	0	1.04	0	0	0.326	0.346	-0.0859304	0.993042
isoform_102611	0	0.13	0	0	0	0	0.043	0	0.45071	0.793851
isoform_102612	40.47	50.29	30.01	128.12	129.34	116.36	40.256	124.606	-1.76923	1.98429e-13
isoform_102613	9.6	9.21	9.85	3.16	8.92	6.93	9.553	6.336	0.452279	0.722029
isoform_102614	21.6	14.29	16.35	14.2	14.66	9.41	17.413	12.756	0.288044	0.773636
isoform_102615	0	0	0	0.04	0	0	0	0.013	NA	NA
isoform_102616	5.42	7.74	7.06	11.35	7.12	20.17	6.74	12.88	-1.03518	0.13122
isoform_102617	9.38	12.08	10.9	12.38	5.85	20.52	10.786	12.916	-0.39417	0.793851
isoform_102619	0	0	0	0.89	0.33	0	0	0.406	-1.86914	0.364013
isoform_10262	0	0	0	0.03	0	0	0	0.01	-0.491608	0.793851
isoform_102621	0.71	0.62	0	1.7	1.23	0	0.443	0.976	-0.8098	0.793851
isoform_102622	0.3	0.58	0	0.2	0.3	0	0.293	0.166	0.623024	0.801514
isoform_102623	0.74	0.9	0.55	0.42	0.51	1.28	0.73	0.736	-0.135705	0.959418
isoform_102624	4	4.7	4.44	16.74	17.93	19.06	4.38	17.91	-2.16446	7.73615e-24
isoform_102625	18.3	28.74	19.25	10.9	13.18	22.22	22.096	15.433	0.365772	0.725877
isoform_102627	13.22	6.46	9.24	3.48	9.52	0	9.64	4.333	0.736132	0.793851
isoform_102629	1.94	0	0.77	1.23	0	0	0.903	0.41	0.36758	0.906203
isoform_10263	13.76	13.48	16.65	7.65	9.25	8.56	14.63	8.486	0.636775	9.96933e-05
isoform_102630	2.59	2.52	2.56	0	1.8	2.07	2.556	1.29	0.705646	0.793851
isoform_102632	1.25	1.48	1.66	0.24	0	0	1.463	0.08	3.11207	0.00560609
isoform_102634	0	0.32	0.3	0.54	0	0	0.206	0.18	-0.207192	0.955053
isoform_102635	0	0	0.26	0	0	0	0.086	0	0.615974	0.793851
isoform_102636	18.52	11.09	22.77	9.73	17.71	20.72	17.46	16.053	-0.0139061	0.995877
isoform_102637	34.53	38.95	70.34	17.08	26.22	12.71	47.94	18.67	1.16638	0.0290778
isoform_102638	4.52	7.79	7.94	7.43	12.16	14.78	6.75	11.456	-0.889374	0.131308
isoform_102639	0	0	0.05	0	0	0	0.016	0	NA	NA
isoform_10264	0	1.13	0	0	0	0	0.376	0	1.20799	0.673411
isoform_102641	0.72	0	0.73	0	0	0	0.483	0	2.05359	0.285603
isoform_102642	15.61	14.14	21.01	19.27	25.66	29.4	16.92	24.776	-0.688912	0.0354389
isoform_102643	0	0	0.37	0.32	0	5.57	0.123	1.963	-1.54069	0.54483
isoform_102646	19.19	21.24	23.11	9.05	6.79	4.56	21.18	6.8	1.43435	0.000181618
isoform_102647	9.19	26.04	35.92	33.4	46.76	64.98	23.716	48.38	-1.11841	0.127434
isoform_102648	0.59	0	0.78	0	0.43	1.16	0.456	0.53	-0.162751	0.97067
isoform_102651	0	0.16	0	0.07	0	0.15	0.053	0.073	-0.0152188	0.995877
isoform_102652	0	0.23	0	0	0	0	0.076	0	0.616677	0.793851
isoform_102657	7.53	4.48	8.03	4.07	1.8	4.64	6.68	3.503	0.717287	0.535449
isoform_102658	1.54	2.04	0	7.51	0	13.44	1.193	6.983	-1.51977	0.556695
isoform_102659	15.64	11.21	19.56	19.27	16.54	11.46	15.47	15.756	-0.188706	0.817146
isoform_102660	0	0	0	0.79	0	0	0	0.263	-0.927436	0.753921
isoform_102664	0	0	0.48	0	0	0	0.16	0	0.768003	0.793851
isoform_102666	0.94	0.39	0	0	1.17	0.44	0.443	0.536	-0.220941	0.951096
isoform_102668	2.35	2.04	0	0	0	0	1.463	0	2.6313	0.106406
isoform_102669	0	0.81	0	0	0	0	0.27	0	0.816907	0.783764
isoform_10267	35.47	39.33	59.01	13.36	7.03	17.89	44.603	12.76	1.60129	0.000353981
isoform_102670	0	0.89	0	0	0	0	0.296	0	0.887969	0.764138
isoform_102672	5.83	0.52	5.07	3.59	5.41	2.47	3.806	3.823	-0.14494	0.958085
isoform_102673	0.42	0	0	0	0	0	0.14	0	0.708866	0.793851
isoform_102674	0	0	0	0.17	0	0	0	0.056	-0.491608	0.793851
isoform_102675	0.11	0	0.11	0.36	0.11	0	0.073	0.156	-0.59189	0.816178
isoform_102676	0.12	0	0	0.12	0	0	0.04	0.04	-0.0356248	0.995877
isoform_102677	0.22	0	0.11	0	0	0.11	0.11	0.036	0.623861	0.7998
isoform_102678	1.48	3.22	0.46	1.45	1.56	3.21	1.72	2.073	-0.373436	0.848475
isoform_102679	0	1.25	1.89	0	0	1.85	1.046	0.616	0.240046	0.943772
isoform_102680	0.29	0	0	1.26	0	2.19	0.096	1.15	-2.04735	0.290918
isoform_102681	0	0	0	0.13	0.13	0	0	0.086	-1.09774	0.725877
isoform_102683	0	0	0	0.21	0	0	0	0.07	-0.491608	0.793851
isoform_102686	0	0.36	0.23	0.45	1.18	0.5	0.196	0.71	-1.51452	0.427757
isoform_102687	0.66	0.64	0.35	0.38	0.12	0.12	0.55	0.206	1.0829	0.66919
isoform_102688	1.55	0.2	0.75	0.38	0.18	0.75	0.833	0.436	0.632641	0.793851
isoform_102692	7.76	4.16	11.86	5.78	6.72	11.49	7.926	7.996	-0.148786	0.920777
isoform_102694	4.06	3.68	0	0	0	0	2.58	0	2.92389	0.0567341
isoform_102695	1.09	0.68	3.35	0	0	0.29	1.706	0.096	2.86604	0.0360795
isoform_102696	0	0	0	7.34	17.11	2.41	0	8.953	-5.77095	2.59502e-08
isoform_102697	1.13	1.59	0.79	0.77	0.88	0.22	1.17	0.623	0.665325	0.776172
isoform_102698	41.12	50.26	53.53	11.02	28.26	45.34	48.303	28.206	0.621955	0.569051
isoform_102699	0.19	0.16	0.79	0	0.42	0	0.38	0.14	0.798753	0.793851
isoform_1027	28.18	30.88	25.39	30.89	30.7	24.29	28.15	28.626	-0.178815	0.750386
isoform_10270	8.35	7.79	9.99	4.35	3.01	4.85	8.71	4.07	0.930982	0.0024059
isoform_102702	2.45	2.67	0.76	1.87	1.65	2.59	1.96	2.036	-0.200848	0.914188
isoform_102704	0	0	0	0	0	0.18	0	0.06	-0.471476	0.793851
isoform_102705	7.31	3.92	4.34	3.12	2.24	2.39	5.19	2.583	0.822443	0.316292
isoform_102706	5.87	7.84	10.72	2.56	3.38	3.32	8.143	3.086	1.21732	0.0115294
isoform_102708	0	1.48	4.87	1.38	2.65	1.08	2.116	1.703	0.129012	0.978551
isoform_102709	0	1.77	0	0	0	0	0.59	0	1.03419	0.729925
isoform_10271	0	0	0	0	0	0.04	0	0.013	-0.471476	0.793851
isoform_102710	0.16	0	0	0.16	0	0	0.053	0.053	-0.0356248	0.995877
isoform_102714	12.55	12.39	20.16	13.46	5.35	8.67	15.033	9.16	0.513779	0.703221
isoform_102717	4.51	5.95	1.57	0	0	22.17	4.01	7.39	-0.359462	0.906203
isoform_102718	0.29	0	0.63	0.3	0	0	0.306	0.1	0.619644	0.802654
isoform_102719	0.47	0.13	0	0.14	0.12	0	0.2	0.086	0.634399	0.79814
isoform_10272	5.53	4.75	5.93	2.26	1.86	2.53	5.403	2.216	1.12748	4.81012e-06
[truncated: 208,418+ more rows]

## Sheet: Supplementary Table S4
Supplementary Table S4 5081 and 3313 genes were up-regulated and down regulated in BL treatment, respectively
Screening Conditions of DEGs	Gene ID	Average Fpkm CK	Average Fpkm BL	Iog2FC (CK vs BL)	Q-value (CK vs BL)
log2 FoldChange (CK vs BL) ≥1, Q-Value < 0.001	isoform_19707	6.673	71.123	3.2629	8.52823e-162
	isoform_44050	4.903	54.693	3.32685	8.44951e-116
	isoform_37851	2.103	29.88	3.67278	5.93286e-95
	isoform_48205	8.846	77.59	2.97443	6.90032e-91
	isoform_46996	2.176	33.573	3.79204	2.2069e-88
	isoform_257413	2.11	14.69	2.64417	2.36707e-72
	isoform_33308	4.42	36.033	2.87046	6.18969e-72
	isoform_286149	1.5	24.136	3.84981	1.01288e-67
	isoform_333731	4.876	31.69	2.54661	4.15276e-66
	isoform_37634	3.12	26.89	2.95262	4.80764e-65
	isoform_165760	1.516	10.953	2.69686	3.27199e-64
	isoform_150366	2.78	14.83	2.26157	5.16215e-63
	isoform_102254	127.866	510.943	1.83923	6.64833e-62
	isoform_43751	1.403	18.866	3.57077	4.5579e-59
	isoform_114592	43.336	414.803	3.08792	1.80532e-56
	isoform_57520	3.236	26.39	2.8588	2.01217e-52
	isoform_5811	3.38	15.176	2.01434	6.77214e-51
	isoform_77160	4.883	27.153	2.32239	1.85003e-50
	isoform_309261	1.99	9.753	2.14144	2.14535e-50
	isoform_267100	1.606	20.156	3.4793	3.72134e-49
	isoform_203390	2.85	18.883	2.56961	1.0316e-48
	isoform_54763	11.043	102.426	3.04261	1.20214e-48
	isoform_20158	6.293	24.96	1.83823	4.41951e-48
	isoform_25593	3.756	40.62	3.26706	1.08696e-47
	isoform_49066	21.186	255.066	3.41053	1.49684e-47
	isoform_86501	1.686	31.043	4.01605	1.26319e-46
	isoform_220157	1.073	8.013	2.74	2.93701e-46
	isoform_37443	1.756	24.35	3.61334	3.08769e-46
	isoform_36069	27.83	151.39	2.28969	1.52438e-45
	isoform_252530	2.6	12.75	2.13753	2.43598e-44
	isoform_8564	0.23	7.52	4.87675	3.501e-44
	isoform_192108	6.533	23.936	1.72229	1.02118e-42
	isoform_24104	9.643	90.47	3.05918	1.55647e-42
	isoform_104922	44.143	286.963	2.5265	1.82942e-42
	isoform_73025	19.836	83.236	1.90893	3.78717e-42
	isoform_47436	2.886	22.953	2.8271	7.41095e-42
	isoform_135338	10.71	43.646	1.87593	7.8864e-42
	isoform_341247	0.74	14.993	4.13554	1.08948e-41
	isoform_89431	64.253	438.516	2.60364	1.65358e-41
	isoform_91456	10.983	64.156	2.37776	2.75541e-41
	isoform_38600	0.973	22.343	4.33203	3.32632e-41
	isoform_57526	14.936	101.703	2.59488	3.63958e-40
	isoform_235719	1.723	17.77	3.18254	3.94718e-40
	isoform_48658	6.946	46.793	2.58593	3.94718e-40
	isoform_152514	2.92	18.22	2.47276	1.69568e-39
	isoform_266031	1.29	20.286	3.78616	2.84012e-39
	isoform_340355	6.85	45.08	2.55616	4.01175e-39
	isoform_77684	1.263	16.223	3.52037	5.38231e-39
	isoform_345173	0.913	18.06	4.0917	1.3258e-38
	isoform_133524	0.463	4.27	3.05605	1.56853e-38
	isoform_307939	0.606	9.666	3.81424	1.70068e-38
	isoform_108875	5.676	86.816	3.73833	2.08321e-38
	isoform_94746	271.923	2389.03	2.94949	2.42361e-38
	isoform_30431	5.783	47.276	2.85794	1.23578e-37
	isoform_198491	2.44	24.42	3.13716	1.46784e-37
	isoform_267785	0	27.113	9.66209	3.23973e-37
	isoform_291578	0.51	8.726	3.89935	3.28669e-37
	isoform_22828	0.06	11.623	7.04163	4.11769e-37
	isoform_15414	2.133	18.58	2.94785	4.77661e-37
	isoform_161465	3.986	28.946	2.69418	5.1316e-37
	isoform_50348	0.966	13.106	3.59527	1.04845e-36
	isoform_320410	2.72	13.146	2.12111	1.09288e-36
	isoform_101590	48.126	309.446	2.51582	1.18713e-36
	isoform_39533	3.143	16.183	2.21378	1.18713e-36
	isoform_13844	19.583	85.033	1.96687	2.23201e-36
	isoform_352233	1.813	10.406	2.36214	3.67996e-36
	isoform_66658	5.086	28.303	2.30583	5.37e-36
	isoform_11292	0.366	7.76	4.20423	1.02516e-35
	isoform_338834	2.563	19.436	2.75781	1.17335e-35
	isoform_134617	3.686	24.7	2.58548	1.58003e-35
	isoform_109624	17.683	61.37	1.6389	1.61437e-35
	isoform_299999	2.863	21.923	2.76899	2.78744e-35
	isoform_29634	0	27.036	9.39038	3.5389e-35
	isoform_252269	2.45	9.173	1.7539	4.53286e-35
	isoform_181757	0.79	5.146	2.55034	5.30883e-35
	isoform_59183	13.92	72.45	2.2241	1.27649e-34
	isoform_81294	0.12	89.76	8.39221	2.97429e-34
	isoform_298134	2.49	23.086	3.0359	5.78585e-34
	isoform_224104	0.803	27.323	4.77831	6.71896e-34
	isoform_200438	2.286	10.416	2.03418	7.84561e-34
	isoform_93148	56.263	206.966	1.72519	2.49951e-33
	isoform_334437	4.673	13.806	1.41087	3.31405e-33
	isoform_14622	27.626	129.213	2.06711	5.15515e-33
	isoform_101697	62.153	228.42	1.71314	8.16277e-33
	isoform_149607	1.31	8.046	2.45005	8.4595e-33
	isoform_105860	40.283	315.693	2.79895	8.58058e-33
	isoform_10482	7.906	47.976	2.44116	9.64091e-33
	isoform_2915	5.18	27.993	2.26771	1.16895e-32
	isoform_133389	1.326	11.44	2.94806	1.29625e-32
	isoform_261093	0.703	10.496	3.69365	1.5558e-32
	isoform_8991	1.48	8.303	2.33968	1.61273e-32
	isoform_21221	8.256	29.563	1.68577	2.46161e-32
	isoform_184140	1.913	26.3	3.56223	2.69499e-32
	isoform_170694	1.226	8.486	2.62607	3.1621e-32
	isoform_268061	0.953	9.49	3.1404	3.1999e-32
	isoform_48649	1.086	10.616	3.09374	4.08128e-32
	isoform_13848	0.37	15.923	5.12517	5.45281e-32
	isoform_216168	9.193	98.493	3.23381	5.4598e-32
	isoform_56664	1.6	29.073	3.975	5.4598e-32
	isoform_12155	1.38	12.056	2.95235	5.56433e-32
	isoform_6083	0.663	12.39	4.00269	8.48992e-32
	isoform_25507	17.776	107.17	2.42905	1.38485e-31
	isoform_167404	1.38	23.94	3.88063	1.91225e-31
	isoform_195322	1.226	8.55	2.6285	2.17292e-31
	isoform_53875	2.383	21.533	3.00912	2.2804e-31
	isoform_59884	13.66	53.346	1.8052	2.66516e-31
	isoform_19376	0.016	31.066	8.87757	5.05335e-31
	isoform_65218	16.716	41.473	1.16155	5.93432e-31
	isoform_79449	17.876	108.353	2.43234	6.26113e-31
	isoform_92024	3.656	54.663	3.69154	6.4076e-31
	isoform_51354	12.196	70.2	2.36635	1.15955e-30
	isoform_181706	0.653	8.716	3.54753	1.70792e-30
	isoform_182305	13.026	57.676	1.98983	1.7144e-30
	isoform_63248	10.646	107.806	3.15619	1.9735e-30
	isoform_215779	2.063	22.223	3.22283	2.11056e-30
	isoform_40393	1.68	11.503	2.59439	3.13454e-30
	isoform_118207	4.333	54.323	3.46635	4.84743e-30
	isoform_56778	9.79	59.04	2.43304	6.97015e-30
	isoform_51679	8.53	75.376	2.96027	7.46952e-30
	isoform_79973	2.566	41.813	3.82882	7.85115e-30
	isoform_76247	16.39	66.616	1.86626	1.21458e-29
	isoform_80897	1.726	24.933	3.68078	1.26063e-29
	isoform_231453	0.586	8.726	3.70459	1.43531e-29
	isoform_138037	2.336	29.153	3.4442	1.67247e-29
	isoform_72812	5.47	42.976	2.79232	2.0212e-29
	isoform_277922	6.72	93.913	3.6004	2.35441e-29
	isoform_35775	4.58	22.113	2.11731	2.68563e-29
	isoform_54930	61.783	332.34	2.25775	2.82021e-29
	isoform_30913	3.686	20.9	2.34019	3.01426e-29
	isoform_326468	1.013	10.366	3.16182	4.27267e-29
	isoform_272746	0.333	6.666	4.07711	5.55256e-29
	isoform_85043	1.023	13.713	3.5149	5.6796e-29
	isoform_233752	4.773	32.46	2.59435	8.84636e-29
	isoform_149615	4.816	34.46	2.6638	9.21192e-29
	isoform_62854	2.24	29.98	3.52995	1.25209e-28
	isoform_83579	6.833	74.923	3.2668	1.29096e-28
	isoform_238354	1.39	7.606	2.29974	1.39628e-28
	isoform_6712	38.45	266.633	2.60972	1.44714e-28
	isoform_32966	35.873	130.026	1.69628	2.04043e-28
	isoform_235794	7.543	91.833	3.40104	2.04079e-28
	isoform_78962	1.783	21.843	3.43053	2.04079e-28
	isoform_32803	0.406	6.406	3.82533	3.16925e-28
	isoform_22102	28.73	225.086	2.79117	3.22163e-28
	isoform_342294	3.93	15.106	1.7901	3.66425e-28
	isoform_333658	1.256	10.386	2.86294	4.96704e-28
	isoform_23654	15.326	62.276	1.86149	5.48703e-28
	isoform_184767	2.553	16.703	2.547	6.33329e-28
	isoform_351394	4.03	32.193	2.80482	6.72611e-28
	isoform_240618	0.476	4.66	3.11027	7.04876e-28
	isoform_159241	1.32	6.276	2.09907	7.54334e-28
	isoform_105918	8.713	49.6	2.3276	7.74141e-28
	isoform_196312	3.473	18.716	2.26984	8.05473e-28
	isoform_4686	0.686	6.116	2.97515	8.69761e-28
	isoform_10306	2.486	20.916	2.89335	9.99803e-28
	isoform_110001	5.3	36.556	2.60772	1.31445e-27
	isoform_289296	0.126	4.753	4.85602	1.39488e-27
	isoform_242319	0.036	10.203	7.08108	1.53974e-27
	isoform_179887	0.543	10.016	4.01189	1.91359e-27
	isoform_324698	4.77	28.853	2.4221	2.03014e-27
	isoform_191504	1.046	13.103	3.45593	3.13046e-27
	isoform_95782	339.07	2686.83	2.78561	7.65729e-27
	isoform_58065	0.163	8.976	5.36902	7.92023e-27
	isoform_47395	4.7	52.16	3.25747	8.85529e-27
	isoform_277178	0.023	4.693	6.833	1.03014e-26
	isoform_353016	2.96	13.813	2.06819	1.2776e-26
	isoform_302469	1.63	31.216	4.00042	1.36521e-26
	isoform_106030	0.256	31.906	6.34519	1.45436e-26
	isoform_10547	0.673	11.24	3.82135	1.67012e-26
	isoform_205955	3.463	37.92	3.26775	1.83517e-26
	isoform_304590	4.636	42.56	3.01518	2.5865e-26
	isoform_631	1.43	12.396	2.93725	3.01773e-26
	isoform_65854	1.91	12.026	2.49735	3.07096e-26
	isoform_7095	3.416	11.256	1.5624	3.11085e-26
	isoform_252500	2.566	11.303	1.97951	3.40386e-26
	isoform_196124	8.966	52.92	2.39615	3.50162e-26
	isoform_226444	0.166	12.556	5.76018	3.86361e-26
	isoform_207473	0.356	4.253	3.36386	4.44672e-26
	isoform_212373	1.02	12.796	3.44987	4.44672e-26
	isoform_179286	0.233	12.25	5.33028	4.69442e-26
	isoform_78072	0.103	16.27	6.45329	4.81137e-26
	isoform_137477	0.92	10.303	3.27036	5.1893e-26
	isoform_291640	5.876	31.38	2.26248	5.85308e-26
	isoform_72351	0.7	14.046	4.05681	8.75783e-26
	isoform_302954	0.296	4.266	3.66631	8.85643e-26
	isoform_177125	5.11	63.753	3.43315	9.34155e-26
	isoform_76219	20.53	93.48	2.02881	1.44696e-25
	isoform_287776	0.64	4.536	2.65161	1.46641e-25
	isoform_182810	3.903	17.8	2.02794	1.70197e-25
	isoform_69533	17.15	85.116	2.15438	1.93097e-25
	isoform_34702	2.77	32.533	3.34864	1.94397e-25
	isoform_47441	9.336	41.473	1.99464	2.11879e-25
	isoform_1026	8.623	31.24	1.70757	2.32178e-25
	isoform_334006	4.01	38.34	3.0672	2.43105e-25
	isoform_4374	0.82	8.076	3.12021	2.56041e-25
	isoform_40092	0	14.876	8.35632	3.10476e-25
	isoform_165256	9.51	35.703	1.7535	3.50339e-25
	isoform_107957	1.56	18.493	3.36867	3.62172e-25
	isoform_216142	0	11.603	8.33502	3.66964e-25
	isoform_343480	0.076	15.22	6.89922	3.74093e-25
	isoform_196763	1.746	18.746	3.24083	4.10123e-25
	isoform_71165	11.06	69.83	2.4727	4.32964e-25
	isoform_90491	20.37	77.366	1.77486	4.62386e-25
	isoform_291047	2.543	54.603	4.16126	7.96379e-25
	isoform_5083	11.04	28.056	1.196	1.20958e-24
	isoform_7092	6.633	16.393	1.15421	1.30554e-24
	isoform_238762	0.606	9.716	3.76577	1.33875e-24
	isoform_236319	1.043	24.493	4.26731	1.40557e-24
	isoform_55773	2.27	29.746	3.50231	1.80743e-24
	isoform_2941	5.263	19.333	1.7171	2.13026e-24
	isoform_80480	15.31	67.466	1.96869	2.43451e-24
	isoform_108437	4.786	65.556	3.56262	2.51843e-24
	isoform_88233	12.643	116.806	2.99998	2.63582e-24
	isoform_140748	0.816	26.166	4.68493	2.81208e-24
	isoform_336708	3.143	13.9	1.97968	2.86423e-24
	isoform_60809	0	17.453	8.24965	2.97341e-24
	isoform_78140	0.29	10.076	4.79281	2.97341e-24
	isoform_84654	0.646	14.556	4.18402	3.27888e-24
	isoform_238386	1.046	7.19	2.62592	3.75114e-24
	isoform_126930	8.39	204.093	4.32618	3.84458e-24
	isoform_197274	1.253	5.39	1.94453	3.93403e-24
	isoform_95130	39.53	383.88	3.07599	4.24515e-24
	isoform_34055	0.506	9.113	3.91908	4.33078e-24
	isoform_255405	14.806	116.266	2.79803	4.39714e-24
	isoform_164571	0.943	8.173	2.92447	5.12927e-24
	isoform_106630	2.726	24.41	2.98119	6.73964e-24
	isoform_352202	0.203	12.473	5.56228	6.88819e-24
	isoform_324321	0.47	3.683	2.8112	7.33255e-24
	isoform_170005	1.536	5.54	1.70443	7.3646e-24
	isoform_4528	18.15	303.866	3.81779	8.35339e-24
	isoform_26528	1.3	9.696	2.71926	8.50872e-24
	isoform_21918	3.313	11.286	1.61764	9.07452e-24
	isoform_350652	1.983	7.696	1.80517	9.80824e-24
	isoform_211795	1.473	34.06	4.27095	1.62676e-23
	isoform_18946	0	9.596	8.1895	1.97163e-23
	isoform_77332	0	22.6	8.12674	2.11215e-23
	isoform_165658	0.686	4.516	2.54541	2.27493e-23
	isoform_99949	2.876	20.503	2.66508	2.29201e-23
	isoform_54094	3.39	20.606	2.43819	2.32202e-23
	isoform_218543	0	14.786	8.20657	2.48775e-23
	isoform_54263	0	16.16	8.18592	2.72624e-23
	isoform_33958	0.756	11.433	3.68082	2.85956e-23
	isoform_15902	1.823	12.62	2.60911	2.89261e-23
	isoform_13996	1.473	15.303	3.18149	3.10554e-23
	isoform_11540	10.123	26.906	1.26003	3.11963e-23
	isoform_137760	0.2	6.813	4.69547	3.4935e-23
	isoform_106499	13.723	70.366	2.18203	5.10407e-23
	isoform_114560	15.54	98.59	2.48344	5.16164e-23
	isoform_50388	6.206	25.876	1.89395	6.46217e-23
	isoform_27216	32.31	84.763	1.23597	6.90565e-23
	isoform_348829	3.033	22.686	2.71848	7.03058e-23
	isoform_24433	3.066	26.543	2.92596	7.71304e-23
	isoform_245876	1.466	15.133	3.17703	7.96682e-23
	isoform_72582	4.133	16.343	1.83175	9.2601e-23
	isoform_4325	4.626	14.936	1.53378	1.03241e-22
	isoform_299403	1.94	10.366	2.24595	1.05748e-22
	isoform_14162	0	8.99	8.13775	1.13604e-22
	isoform_73269	21.753	124.62	2.35295	1.13604e-22
	isoform_155357	3.443	95.086	4.45686	1.19268e-22
	isoform_335500	1	12.503	3.45246	1.29583e-22
	isoform_249258	1.13	12.99	3.33377	1.83809e-22
	isoform_5042	0.573	5.013	2.94705	1.83809e-22
	isoform_148420	0.596	16.153	4.41508	1.95665e-22
	isoform_335166	1.57	6.55	1.90314	1.99608e-22
	isoform_41146	2.653	56.1	4.10411	2.0563e-22
	isoform_155788	0	7.93	8.00956	2.30823e-22
	isoform_19891	5.126	30.586	2.39079	2.30823e-22
	isoform_39737	0.486	8.256	3.86605	2.30823e-22
	isoform_19370	1.463	24.42	3.80987	2.35409e-22
	isoform_314557	0.103	8.12	5.79187	2.41805e-22
	isoform_42819	5.003	46.763	3.03184	2.42523e-22
	isoform_119073	18.65	160.706	2.90931	2.54598e-22
	isoform_96253	10.363	95.063	2.99892	2.7701e-22
	isoform_62623	58.76	264.526	2.00001	2.83958e-22
	isoform_27566	1.783	16.23	3.00088	2.87058e-22
	isoform_44952	0.03	8.23	6.82005	3.18845e-22
	isoform_16340	0.03	12.69	7.53021	3.66119e-22
	isoform_189159	1.1	5.833	2.23412	3.67766e-22
	isoform_251674	2.223	15.646	2.64439	3.97287e-22
	isoform_13019	2.113	15.306	2.66001	4.17137e-22
	isoform_50764	0.823	25.096	4.60746	4.67849e-22
	isoform_167623	3.61	38.75	3.19641	4.94069e-22
	isoform_206076	1.823	6.896	1.76487	5.12659e-22
	isoform_51495	3.383	59.323	3.87406	6.12367e-22
	isoform_99686	522.943	3223.75	2.44209	6.62305e-22
	isoform_150734	0.693	10.406	3.65587	6.65282e-22
	isoform_239277	7.806	29.426	1.75759	6.97355e-22
	isoform_83083	0	20.056	7.96889	6.97355e-22
	isoform_94175	1.53	17.646	3.31496	8.35298e-22
	isoform_350494	0	8.553	7.94165	9.80951e-22
	isoform_96978	21.06	162.1	2.75483	1.00838e-21
	isoform_330172	1.956	20.543	3.19828	1.04713e-21
	isoform_87483	14.286	246.846	3.84945	1.06326e-21
	isoform_41467	7.9	47.363	2.41715	1.0655e-21
	isoform_59340	0.44	10.503	4.29436	1.412e-21
	isoform_187330	1.013	7.463	2.70993	1.43569e-21
	isoform_54131	6.396	19.056	1.42421	1.4498e-21
	isoform_100910	35.54	149.616	1.90526	1.51082e-21
	isoform_257288	1.4	8.356	2.41501	2.06556e-21
	isoform_88895	5.23	67.91	3.47846	2.26864e-21
	isoform_38314	56.116	148.653	1.25221	2.39721e-21
	isoform_5528	0	4.756	7.82497	2.44044e-21
	isoform_322405	2.22	12.59	2.34205	2.45907e-21
	isoform_14326	2.086	7.42	1.6716	2.67156e-21
	isoform_35715	2.486	12.36	2.15146	2.67156e-21
	isoform_30378	0.846	11.623	3.57767	2.9232e-21
	isoform_56137	6.073	27.673	2.02551	3.03512e-21
	isoform_301827	3.553	11.433	1.53246	3.05173e-21
	isoform_80620	0.926	14.64	3.7339	3.05173e-21
	isoform_210432	6.82	18.07	1.25006	3.21813e-21
	isoform_144826	1.873	17.38	3.01545	3.52506e-21
	isoform_91823	0	20.083	7.83976	3.65279e-21
	isoform_59014	0.026	11.956	7.17124	3.65786e-21
	isoform_82171	5.21	31.583	2.43455	4.23198e-21
	isoform_231304	5.013	36.36	2.68591	4.53575e-21
	isoform_89933	15.94	127.31	2.80174	4.58092e-21
	isoform_222174	3.596	18.32	2.17622	4.60597e-21
	isoform_3349	1.81	11.67	2.50772	4.63074e-21
	isoform_73693	2.923	36.17	3.39294	4.91033e-21
	isoform_110134	72.223	402.576	2.28914	4.92637e-21
	isoform_201241	0.706	15.853	4.2023	4.92637e-21
	isoform_63526	1.61	21.026	3.4749	5.34934e-21
	isoform_59481	7.953	26.326	1.57596	5.44392e-21
	isoform_59917	0	11.676	7.78996	5.67916e-21
	isoform_80255	0	15.513	7.77925	5.86226e-21
	isoform_192834	1.983	12.726	2.5144	6.14572e-21
	isoform_41294	1.773	37.84	4.10942	6.29866e-21
	isoform_6029	0	4.956	7.80356	6.57801e-21
	isoform_133590	1.863	12.47	2.57156	8.31156e-21
	isoform_126277	723.406	4625.69	2.48814	8.98791e-21
	isoform_89767	0.96	16.61	3.90001	9.32625e-21
	isoform_49775	4.41	86.656	4.01144	9.49712e-21
	isoform_67764	3.463	23.903	2.59015	1.07969e-20
	isoform_34609	5.276	59.29	3.27613	1.10337e-20
	isoform_114188	0.063	29.713	7.21426	1.19367e-20
	isoform_148470	0.69	4.436	2.51815	1.19367e-20
	isoform_36397	0.003	7.736	7.72371	1.35201e-20
	isoform_206568	0.656	7.083	3.24806	1.37406e-20
	isoform_81638	4.34	20.95	2.10541	1.46248e-20
	isoform_192904	3.563	15.553	1.95626	1.49618e-20
	isoform_50015	13.88	77.46	2.30492	1.66819e-20
	isoform_59963	0	11.22	7.74135	1.71933e-20
	isoform_33401	3.61	28.42	2.77457	1.73484e-20
	isoform_57155	0.81	12.636	3.73523	1.81615e-20
	isoform_237369	1.233	12.676	3.13309	1.84983e-20
	isoform_82381	0.123	16.066	6.27881	1.86845e-20
	isoform_23861	0.286	5.706	4.09655	2.11017e-20
	isoform_348735	1.396	9.363	2.57748	2.41007e-20
	isoform_152717	0.066	6.996	5.92258	2.42686e-20
	isoform_307221	1.053	7.696	2.70856	2.53751e-20
	isoform_33916	0	7.7	7.71696	2.59759e-20
	isoform_71395	0	15.42	7.79647	2.74645e-20
	isoform_258932	0.853	8.686	3.13489	3.02636e-20
	isoform_10790	17.093	69.936	1.87127	3.42638e-20
	isoform_202226	0.683	7.846	3.29923	3.4745e-20
	isoform_38057	0.76	10.793	3.5936	3.99175e-20
	isoform_63552	19.776	47.653	1.11572	4.00328e-20
	isoform_92844	21.713	262.34	3.35924	6.0114e-20
	isoform_246995	1.453	8.69	2.40403	6.06911e-20
	isoform_332707	0.593	4.26	2.6655	6.26626e-20
	isoform_183642	1.183	12.216	3.16367	6.29117e-20
	isoform_342862	5.2	24.676	2.08176	6.29117e-20
	isoform_46855	8.336	41.226	2.14106	6.29117e-20
	isoform_44919	0.023	7.586	7.03781	6.50446e-20
	isoform_147651	0.863	15.156	3.85764	6.71117e-20
	isoform_310139	2.346	14.203	2.42745	7.24466e-20
	isoform_97779	4.446	25.28	2.34731	7.38044e-20
	isoform_299671	0.336	13.856	4.90131	7.65827e-20
	isoform_274400	3.943	17.706	1.99776	8.23135e-20
	isoform_144142	1.723	15.453	2.97966	8.38704e-20
	isoform_111804	4.073	35.936	2.93968	8.50975e-20
	isoform_9854	3.1	10.01	1.54067	8.63289e-20
	isoform_235653	2.426	21.163	2.90835	8.91848e-20
	isoform_57762	13.28	31.23	1.08282	9.16796e-20
	isoform_266804	0.353	6.646	3.94386	1.198e-19
	isoform_16784	0.046	7.316	6.23488	1.25145e-19
	isoform_119713	0	45.63	7.67257	1.32505e-19
	isoform_154938	1.01	8.746	2.92371	1.35039e-19
	isoform_27233	0.836	7.35	2.95396	1.35039e-19
	isoform_112198	0	21.58	7.58561	1.48023e-19
	isoform_245176	1.633	5.663	1.63644	1.48858e-19
	isoform_49466	2.97	29.436	3.11381	1.51441e-19
	isoform_118370	10.346	74.03	2.63145	1.54186e-19
	isoform_36701	0	7.92	7.61959	1.60942e-19
	isoform_734	2.646	7.236	1.30066	1.67356e-19
	isoform_103398	98.926	383.54	1.78231	1.89052e-19
	isoform_10798	1.713	10.32	2.42294	2.17054e-19
	isoform_233945	0	5.386	7.78943	2.36499e-19
	isoform_1622	0.183	2.69	3.66089	2.45952e-19
	isoform_257706	5.443	40.063	2.67683	2.51599e-19
	isoform_311168	0.606	7.393	3.35904	2.54741e-19
	isoform_303942	0.236	8.3	4.73701	2.62742e-19
	isoform_16162	4.223	33.236	2.78898	2.70006e-19
	isoform_43877	7.906	37.42	2.06489	2.76589e-19
	isoform_22634	12.523	68.856	2.28915	2.80297e-19
	isoform_45258	12.84	121.95	3.03304	2.80297e-19
	isoform_301077	3.246	9.57	1.3982	3.04317e-19
	isoform_204493	3.163	34.796	3.24538	3.50821e-19
	isoform_82428	5.726	175.573	4.56105	3.50948e-19
	isoform_168792	0.306	7.403	4.36769	3.72445e-19
	isoform_33989	6.663	36.69	2.28858	4.01388e-19
	isoform_41320	4.363	15.983	1.71927	4.25508e-19
	isoform_79954	43.856	157.706	1.68258	4.28242e-19
	isoform_325882	0	18.723	7.66658	4.30222e-19
	isoform_260037	11.613	41.246	1.67521	4.54153e-19
	isoform_93360	10.03	65.313	2.52041	4.55141e-19
	isoform_340522	0.01	7.973	7.59797	4.76327e-19
	isoform_228234	1.573	6.786	1.93552	4.9517e-19
	isoform_300034	1.073	20.156	3.95186	4.99298e-19
	isoform_203618	0.243	8.966	4.73194	5.09384e-19
	isoform_300177	1.926	9.88	2.19324	5.1441e-19
	isoform_155974	1.46	7.77	2.24123	5.39095e-19
	isoform_32517	3.586	14.633	1.87331	5.49936e-19
	isoform_63648	1.463	20.793	3.58899	5.74106e-19
	isoform_338154	1.22	7.376	2.40699	6.03867e-19
	isoform_291181	0.98	8.006	2.84903	6.27209e-19
	isoform_266158	1.356	7.726	2.34132	6.31715e-19
	isoform_90497	44.683	270.773	2.40848	6.44858e-19
	isoform_316424	0.12	4.026	4.84705	7.29614e-19
	isoform_89022	0.066	11.54	6.40412	7.52039e-19
	isoform_66717	0	11.983	7.54646	7.54654e-19
	isoform_36486	0.453	6.626	3.61108	8.17352e-19
	isoform_136325	1.156	11.7	3.12768	8.67156e-19
	isoform_15494	2.666	14.196	2.2305	9.38152e-19
	isoform_11121	8.423	32.033	1.76101	9.51711e-19
	isoform_334543	0.803	7.616	3.03148	9.90622e-19
	isoform_81155	2.75	18.253	2.54676	1.00691e-18
	isoform_271156	0.066	9.2	6.13189	1.11846e-18
	isoform_157694	1.303	8.153	2.47557	1.21242e-18
	isoform_54711	0.333	8.623	4.32053	1.22601e-18
	isoform_277832	0.793	7.553	3.03676	1.24211e-18
	isoform_51606	1.08	7.756	2.65642	1.24352e-18
	isoform_22308	1.033	9.563	3.01111	1.24821e-18
	isoform_31063	2.133	12.743	2.40895	1.30317e-18
	isoform_54765	26.016	75.703	1.38797	1.34626e-18
	isoform_139782	14.513	57.486	1.82085	1.47139e-18
	isoform_223221	18.193	42.573	1.07881	1.5382e-18
	isoform_310366	0.9	10.86	3.36229	1.5936e-18
	isoform_155724	0	7.163	7.52899	1.6204e-18
	isoform_336698	2.393	10.246	1.94199	1.6204e-18
	isoform_41602	6.486	26.27	1.85949	1.67607e-18
	isoform_341064	0.223	3.706	3.8	1.72035e-18
	isoform_293118	34.213	83.206	1.13654	1.87712e-18
	isoform_11651	1.016	4.846	2.08154	1.87747e-18
	isoform_66620	25.5	103.65	1.86967	1.91576e-18
	isoform_23700	4.05	13.016	1.5349	1.99433e-18
	isoform_308305	0.576	3.646	2.49639	2.2022e-18
	isoform_344593	0.09	6.79	5.51735	2.56057e-18
	isoform_279833	1.056	7.19	2.57474	2.6048e-18
	isoform_255859	4.21	14.09	1.5831	2.61474e-18
	isoform_246100	7.14	28.87	1.85823	2.64367e-18
	isoform_101921	4.463	27.72	2.43521	2.66202e-18
	isoform_53037	0.726	6.2	2.8926	2.72582e-18
	isoform_232953	2.163	6.523	1.44376	2.73765e-18
	isoform_50521	6.62	22.81	1.62245	2.73765e-18
	isoform_304627	3.463	33.873	3.08302	2.75526e-18
	isoform_343843	3.08	13.57	1.98268	2.88985e-18
	isoform_5819	0	4.16	7.50061	3.08358e-18
	isoform_73275	1.963	16.726	2.88846	3.58828e-18
	isoform_203166	1.036	7.003	2.56433	3.61095e-18
	isoform_26294	3.216	17.006	2.23779	3.62001e-18
	isoform_77526	4.406	29.92	2.57574	3.85256e-18
	isoform_127725	0	53.59	7.38365	3.90792e-18
	isoform_273914	0.603	2.816	2.05161	3.98826e-18
	isoform_94248	2.696	59.99	4.16222	4.03631e-18
	isoform_321616	0.996	11.866	3.36605	4.06834e-18
	isoform_248380	0.66	5.74	2.93136	4.23375e-18
	isoform_99288	14.61	51.06	1.64015	4.23375e-18
	isoform_97593	0.553	19.926	4.71693	4.625e-18
	isoform_227319	1.793	14.206	2.80785	5.17882e-18
	isoform_225037	0.506	5.556	3.23905	5.2399e-18
	isoform_73099	7.156	78.116	3.22927	5.28174e-18
	isoform_2963	4.536	14.883	1.5592	5.33096e-18
	isoform_181118	0.75	15.243	4.11961	5.42939e-18
	isoform_113311	1.253	19.916	3.70196	5.77483e-18
	isoform_75899	4.78	26.606	2.29943	5.8005e-18
	isoform_339734	4.843	11.733	1.13008	5.98535e-18
	isoform_248559	0.09	6.096	5.55179	6.08888e-18
	isoform_85453	4.903	25.483	2.20338	6.90105e-18
	isoform_6509	0.43	4.78	3.25155	7.05446e-18
	isoform_57073	0	8.526	7.35573	8.76099e-18
	isoform_36236	0	7.52	7.45376	8.85784e-18
	isoform_74760	0.056	11.04	6.51351	9.10051e-18
	isoform_318202	0.54	9.093	3.77796	9.61241e-18
	isoform_347177	12.113	46.546	1.77661	1.04093e-17
	isoform_11040	2.733	10.986	1.85609	1.04479e-17
	isoform_294648	1.46	12.136	2.8499	1.04608e-17
	isoform_223120	0.54	19.076	4.74752	1.05135e-17
	isoform_28709	5.206	17.996	1.63248	1.12637e-17
	isoform_67645	29.896	77.646	1.22665	1.27043e-17
	isoform_42667	2.54	48.763	3.96638	1.42734e-17
	isoform_336989	1.403	6.36	2.00803	1.43118e-17
	isoform_15278	1.376	11.353	2.8502	1.44706e-17
	isoform_1522	3.37	7.893	1.07722	1.60272e-17
	isoform_76511	4.9	26.69	2.28473	1.69453e-17
	isoform_9429	0.646	5.943	3.00004	1.69453e-17
	isoform_178533	0.583	10.433	3.86796	1.81595e-17
	isoform_119740	5.35	69.263	3.46517	1.8268e-17
	isoform_315782	0.063	9.06	6.02376	1.91822e-17
	isoform_142594	2.29	22.643	3.11112	1.92208e-17
	isoform_37219	13.68	36.353	1.25928	2.04979e-17
	isoform_2004	7.14	26.88	1.76193	2.08756e-17
	isoform_21188	22.303	58.253	1.23082	2.13736e-17
	isoform_24786	3.003	11.62	1.79706	2.24873e-17
	isoform_62455	1.076	11.953	3.24188	2.28441e-17
	isoform_254931	0.653	9.42	3.58018	2.3404e-17
	isoform_12555	0.993	10.053	3.12879	2.34704e-17
	isoform_198962	0.48	4.26	2.96662	2.40152e-17
	isoform_4826	0.98	4.936	2.15515	2.405e-17
	isoform_40878	0.956	11.57	3.34273	2.43019e-17
	isoform_25804	2.663	9.546	1.6841	2.47124e-17
	isoform_30515	0.856	7.763	2.94946	2.53635e-17
	isoform_33782	6.593	18.253	1.31616	2.53918e-17
	isoform_63333	0.966	28.09	4.48833	2.65206e-17
	isoform_257019	1.353	12.323	3.0169	2.77896e-17
	isoform_65545	1.266	15.276	3.37888	2.80002e-17
	isoform_42772	3.786	13.513	1.6723	2.98657e-17
	isoform_95750	1.606	49.463	4.51377	3.00972e-17
	isoform_259083	0.423	2.68	2.47493	3.30491e-17
	isoform_64818	1.813	24.593	3.52056	3.3101e-17
	isoform_62341	91.683	460.693	2.14336	3.32303e-17
	isoform_21002	0.563	4.083	2.65422	3.41682e-17
	isoform_98572	1.103	22.253	4.0438	3.42704e-17
	isoform_8605	3.886	13.696	1.66098	3.49084e-17
	isoform_91640	12.083	52.466	1.94682	3.67314e-17
	isoform_215809	0.236	6.526	4.36744	3.7636e-17
	isoform_161583	1.413	30.466	4.10483	3.8073e-17
	isoform_166775	0.903	7.156	2.79721	3.92418e-17
	isoform_27788	6.513	31.676	2.11397	4.04656e-17
	isoform_204886	0	5.31	7.66313	4.20769e-17
	isoform_2841	3.14	8.056	1.2122	4.27203e-17
	isoform_289358	0.733	7.726	3.20776	4.46796e-17
	isoform_310660	1.27	17.63	3.55783	4.53021e-17
	isoform_183138	1.806	11.04	2.43889	4.80185e-17
	isoform_81517	0	17.75	7.47914	5.09582e-17
	isoform_303023	0.323	7.316	4.1245	5.10845e-17
	isoform_3879	0	4.36	7.44183	5.25079e-17
	isoform_173344	0.256	8.14	4.68604	5.26931e-17
	isoform_83087	3.396	29.95	2.94825	5.87966e-17
	isoform_37106	2.973	10.486	1.67181	6.49962e-17
	isoform_60012	0.176	5.913	4.60706	6.77335e-17
	isoform_16440	42.88	136.113	1.50476	7.01509e-17
	isoform_16590	1.01	7.656	2.71989	7.4912e-17
	isoform_256392	1.836	8.55	2.04687	7.4912e-17
	isoform_305244	0.853	7.736	2.98607	7.89158e-17
	isoform_150798	0.086	7.153	5.68462	8.23977e-17
	isoform_97671	77.063	1703.86	4.12162	8.3789e-17
	isoform_10981	2.39	11.566	2.11358	8.39348e-17
	isoform_99010	1.48	13.67	2.98407	8.7345e-17
	isoform_141570	0.283	4.59	3.79413	8.78831e-17
	isoform_74693	33.78	92.1	1.28734	8.80947e-17
	isoform_18604	0.973	12.26	3.42941	8.97775e-17
	isoform_294286	2.27	29.596	3.45928	9.64262e-17
	isoform_28276	14.686	58.853	1.83597	1.01443e-16
	isoform_56298	5.8	29.886	2.19886	1.01443e-16
	isoform_311688	29.58	219.34	2.69434	1.11301e-16
	isoform_166043	0.05	2.94	5.35622	1.17677e-16
	isoform_9919	0	4.496	7.28939	1.21173e-16
	isoform_348730	0.643	5.75	2.94856	1.22711e-16
	isoform_52034	36.396	415.436	3.27485	1.22711e-16
	isoform_74737	3.47	21.566	2.44009	1.24033e-16
	isoform_105889	442.436	3813.11	2.88822	1.25011e-16
	isoform_185336	0.676	4.093	2.43385	1.31092e-16
	isoform_174001	1.74	7.133	1.88538	1.33102e-16
	isoform_296477	0.426	4.563	3.24552	1.43231e-16
	isoform_160645	4.553	17.413	1.77016	1.43719e-16
	isoform_213984	4.066	17.496	1.9386	1.45298e-16
	isoform_64267	0.173	5.69	4.58094	1.45986e-16
	isoform_28647	1.58	7.646	2.10019	1.47681e-16
	isoform_294553	0.46	7.32	3.6922	1.47792e-16
	isoform_260338	0.263	5.836	4.22578	1.53762e-16
	isoform_177367	2.056	9.97	2.10647	1.59172e-16
	isoform_263560	9.91	40.203	1.86035	1.60316e-16
	isoform_211340	2.64	11.436	1.94184	1.64221e-16
	isoform_27550	0	4.863	7.18231	1.66123e-16
	isoform_181333	5.013	42.21	2.8722	1.66736e-16
	isoform_80781	6.743	25.853	1.77627	1.66736e-16
	isoform_39279	4.766	25.743	2.24328	1.69584e-16
	isoform_268869	1.55	6.49	1.89876	1.73671e-16
	isoform_261625	0	13.226	7.48738	1.75198e-16
	isoform_135785	1.063	7.063	2.54929	1.76701e-16
	isoform_308511	0.273	5.24	3.91833	1.94594e-16
	isoform_109819	1.843	14.69	2.77701	2.00576e-16
	isoform_107837	7.033	52.44	2.69065	2.06039e-16
	isoform_85936	34.616	128.623	1.71978	2.08125e-16
	isoform_272153	1.173	5.453	2.0409	2.14656e-16
	isoform_9515	0	3.613	7.17172	2.36637e-16
	isoform_109604	6.813	33.946	2.14799	2.44146e-16
	isoform_252856	0.06	7.673	6.01399	2.51923e-16
	isoform_297208	0.183	2.983	3.88751	2.52706e-16
	isoform_138554	0.883	7.153	2.81393	2.61174e-16
	isoform_313926	3.71	21.163	2.31591	2.61174e-16
	isoform_97571	0.416	14.806	4.66148	2.64999e-16
	isoform_243307	1.843	8.296	2.00328	2.77941e-16
	isoform_194827	2.093	8.713	1.89334	2.80124e-16
	isoform_87091	30.76	110.903	1.68899	2.81111e-16
	isoform_18135	4.343	25.93	2.3977	3.01488e-16
	isoform_91458	6.286	21.146	1.59737	3.08018e-16
	isoform_84337	3.506	44.66	3.4042	3.08063e-16
	isoform_310791	0.89	5.716	2.4812	3.19117e-16
	isoform_214730	0.106	8.093	5.44249	3.27281e-16
	isoform_258563	0.79	4.373	2.30471	3.36193e-16
	isoform_25512	0.796	5.663	2.6595	3.42719e-16
	isoform_73807	0	15.07	7.22023	3.49551e-16
	isoform_350152	0.826	8.306	3.09731	3.60818e-16
	isoform_37672	6.703	31.933	2.0863	3.81512e-16
	isoform_26030	0	4.286	7.08975	3.94092e-16
	isoform_116077	53.11	493.626	2.97731	4.03344e-16
	isoform_156822	2.126	9.863	2.04333	4.24913e-16
	isoform_200002	6.97	67.263	3.05524	4.70259e-16
	isoform_69063	0	7.483	7.07064	4.70259e-16
	isoform_50036	2.836	17.943	2.4873	4.8558e-16
	isoform_119397	13.563	93.49	2.601	4.88192e-16
	isoform_28377	0.673	6.026	2.94805	4.98578e-16
	isoform_237436	1.026	3.216	1.49821	5.02908e-16
	isoform_232236	0.29	7.316	4.25368	5.07793e-16
	isoform_41217	0.396	8.18	4.04606	5.0859e-16
	isoform_38460	1.676	14.576	2.89962	5.4133e-16
	isoform_250283	3.22	78.153	4.24178	6.01734e-16
	isoform_244269	1.22	14.966	3.37051	6.02149e-16
	isoform_166014	0.766	15.41	4.01331	6.24799e-16
	isoform_281203	0.97	8.003	2.85286	6.36326e-16
	isoform_197589	0.446	8.653	3.98442	6.45071e-16
	isoform_334829	10.266	44.653	1.94652	6.58981e-16
	isoform_312969	0.126	4.283	4.58328	6.8788e-16
	isoform_94206	8.506	48.563	2.34157	6.94821e-16
	isoform_57436	1.873	15.126	2.81761	7.05841e-16
	isoform_316961	4.223	23.056	2.2753	7.48271e-16
	isoform_61546	11.596	114.34	3.08149	7.57575e-16
	isoform_87824	2.906	14.936	2.18842	7.61767e-16
	isoform_145986	1.37	9.316	2.56691	7.6912e-16
	isoform_235792	0.046	5.243	5.93701	8.25571e-16
	isoform_8213	1.843	8.383	2.02914	8.54231e-16
	isoform_321895	0.32	8.856	4.42831	9.04833e-16
	isoform_265253	0.943	6.316	2.54845	9.9355e-16
	isoform_242533	3.446	17.77	2.1908	1.01139e-15
	isoform_284918	0.573	10.586	3.86393	1.06702e-15
	isoform_55786	0.016	12.09	6.92746	1.06929e-15
	isoform_351443	3.37	32.99	3.03525	1.09927e-15
	isoform_270423	0.243	6.096	4.24796	1.13451e-15
	isoform_78174	0.12	8.11	5.36774	1.14139e-15
	isoform_23983	1.426	8.076	2.32566	1.14834e-15
	isoform_174544	7.503	48.133	2.49252	1.24849e-15
	isoform_207279	2.066	25.623	3.38194	1.24873e-15
	isoform_169955	1.303	26.98	4.04069	1.29695e-15
	isoform_59633	7.59	34.3	2.00774	1.36189e-15
	isoform_215430	0.516	5.033	3.03216	1.37116e-15
	isoform_19440	0.413	4.843	3.32952	1.44801e-15
	isoform_85987	10.353	57.673	2.28772	1.44801e-15
	isoform_253112	0.28	2.306	2.83833	1.5118e-15
	isoform_59344	1.483	16.893	3.26547	1.5239e-15
	isoform_312031	0.086	4.223	5.12397	1.52515e-15
	isoform_34929	1.31	7.063	2.25109	1.64182e-15
	isoform_28628	6.063	24.56	1.86568	1.66228e-15
	isoform_325065	0.653	3.53	2.28409	1.67675e-15
	isoform_153116	0.066	4.133	5.38202	1.70876e-15
	isoform_354007	9.453	29.163	1.47613	1.71858e-15
	isoform_49208	0	7.973	7.14114	1.71891e-15
	isoform_98889	1.69	32.25	3.96601	1.75531e-15
	isoform_205575	10.326	25.126	1.13231	1.77356e-15
	isoform_27751	2.666	15.933	2.38771	1.79593e-15
	isoform_74469	0.363	10.473	4.49084	1.84687e-15
	isoform_165881	0.233	11.616	5.03039	1.92494e-15
	isoform_104132	17.003	95.283	2.29034	1.92786e-15
	isoform_230678	0.726	3.933	2.266	2.00937e-15
	isoform_53331	0	7.253	7.08821	2.04101e-15
	isoform_87696	1.793	10.536	2.38921	2.04268e-15
	isoform_352735	0.516	7.293	3.5469	2.13875e-15
	isoform_311102	0.496	5.25	3.16442	2.17696e-15
	isoform_70389	5.19	23.026	1.98825	2.36328e-15
	isoform_278619	0.44	19.03	4.88014	2.5149e-15
	isoform_304097	6.316	51.053	2.81778	2.53314e-15
	isoform_34810	0.093	3.3	4.68582	2.57897e-15
	isoform_53769	0	6.076	6.99309	2.58013e-15
	isoform_295954	1.64	6.123	1.749	2.86586e-15
	isoform_141966	1.483	7.58	2.18478	2.88956e-15
	isoform_284460	4.003	18.746	2.05689	2.88997e-15
	isoform_185307	1.676	10.333	2.44191	3.09452e-15
	isoform_248699	0.663	29.54	4.90073	3.18004e-15
	isoform_242780	0.496	4.563	3.00731	3.29904e-15
	isoform_84617	4.316	22.023	2.18544	3.30502e-15
	isoform_52480	3.74	12.996	1.63878	3.32326e-15
	isoform_16895	0.133	5.093	4.84214	3.43933e-15
	isoform_160776	1.913	5.636	1.41138	3.63631e-15
	isoform_241540	1.986	11.796	2.37731	3.69859e-15
	isoform_149182	4.61	18.413	1.83885	3.81254e-15
	isoform_3755	3.113	21.763	2.60742	3.85934e-15
	isoform_169098	0.83	3.78	2.01266	3.96262e-15
	isoform_116340	1.573	22.383	3.60577	4.08207e-15
	isoform_166818	5.18	44.553	2.89313	4.10546e-15
	isoform_154403	0.39	4.79	3.43042	4.12306e-15
	isoform_25460	6.453	17.053	1.25033	4.17855e-15
	isoform_84302	5.466	18.076	1.57398	4.19065e-15
	isoform_101340	13.093	59.366	1.99585	4.29237e-15
	isoform_244452	1.046	8	2.72423	4.42007e-15
	isoform_262475	1.886	9.306	2.15472	4.62196e-15
	isoform_46598	10.066	32.116	1.51319	4.7301e-15
	isoform_320142	0.053	4.383	5.53506	4.91031e-15
	isoform_218849	0.016	3.686	6.37453	5.12073e-15
	isoform_337752	2.566	9.976	1.79023	5.12073e-15
	isoform_185659	1.673	62.41	4.73407	5.15568e-15
	isoform_153199	0.61	5.2	2.86955	5.56698e-15
	isoform_55937	0.373	5.373	3.56996	5.5807e-15
	isoform_67897	0	9.453	7.02783	5.58528e-15
	isoform_47364	0.046	3.703	5.45663	5.60481e-15
	isoform_244375	0.56	6.936	3.39848	5.67043e-15
	isoform_317586	8.763	25.106	1.35909	5.75797e-15
	isoform_33997	11.223	57.97	2.17491	5.76813e-15
	isoform_13057	0.343	3.606	3.13184	6.08523e-15
	isoform_235915	4.18	88.476	4.06105	6.08689e-15
	isoform_80532	10.143	71.35	2.6094	6.08689e-15
	isoform_4542	3.006	10.186	1.59899	6.2293e-15
	isoform_41259	2.153	11.433	2.22824	6.23027e-15
	isoform_39797	18.87	90.713	2.07999	6.46908e-15
	isoform_99290	0.216	11.39	5.31668	6.7628e-15
	isoform_176822	1.696	7.823	2.04494	7.27146e-15
	isoform_28774	1.55	13.03	2.85563	7.27828e-15
	isoform_200210	0.673	5.196	2.75072	7.40442e-15
	isoform_110173	14.876	77.813	2.19508	7.48233e-15
	isoform_188071	0.896	8.71	3.06258	7.48233e-15
	isoform_316349	0	2.513	6.92578	7.62132e-15
	isoform_328269	1.716	13.746	2.80002	7.86377e-15
	isoform_26574	18.36	41.74	1.02961	8.00554e-15
	isoform_9513	0.286	7.91	4.33953	8.03996e-15
	isoform_74804	0	9.756	7.0191	8.09223e-15
	isoform_317015	2.023	8.226	1.8518	8.82246e-15
	isoform_29568	6.336	22.6	1.68046	8.86676e-15
	isoform_275578	0	14.196	7.4043	8.93723e-15
	isoform_138468	0.853	4.556	2.22566	9.15741e-15
	isoform_224748	2.49	19.19	2.74462	9.28229e-15
	isoform_63238	1.716	8.53	2.14421	9.39677e-15
	isoform_257421	6.466	27.12	1.89153	9.54644e-15
	isoform_78284	10.196	29.326	1.36773	9.72308e-15
	isoform_191966	8.806	35.293	1.83827	9.72653e-15
	isoform_33590	0	9.93	7.22763	9.72883e-15
	isoform_222011	5.933	35.873	2.41137	1.02352e-14
	isoform_247691	1.426	17.92	3.40452	1.02967e-14
	isoform_284136	0.486	7.106	3.58696	1.04498e-14
	isoform_197565	4.6	27.92	2.42033	1.09073e-14
	isoform_158942	10.5	31.243	1.42004	1.11756e-14
	isoform_149765	1.51	10.763	2.66418	1.17848e-14
	isoform_256310	1.88	41.056	4.09219	1.20054e-14
	isoform_77402	12.853	86.463	2.55003	1.2223e-14
	isoform_215349	0.483	5.936	3.36754	1.23388e-14
	isoform_341402	3.526	19.216	2.25964	1.42536e-14
	isoform_36786	3.926	11.303	1.37796	1.43208e-14
	isoform_65482	3.036	39.626	3.45204	1.43633e-14
	isoform_150429	0.446	2.913	2.53574	1.44467e-14
	isoform_312586	0.673	3.61	2.24535	1.48425e-14
	isoform_316076	0.076	3.233	4.79489	1.50699e-14
	isoform_257668	4.05	93.516	4.1494	1.51264e-14
	isoform_13789	1.97	16.38	2.8199	1.51881e-14
	isoform_109703	0.636	18.106	4.38971	1.53089e-14
	isoform_23765	0.843	5.516	2.54452	1.61581e-14
	isoform_98303	39.94	538.713	3.46001	1.63622e-14
	isoform_99906	32.783	287.586	2.91573	1.66566e-14
	isoform_264992	0.82	5.57	2.58296	1.66678e-14
	isoform_94703	42.56	980.886	4.14725	1.68027e-14
	isoform_7052	0	2.9	6.91721	1.69491e-14
	isoform_342051	0.063	3.626	5.12588	1.71959e-14
	isoform_78017	1.673	22.29	3.45889	1.77371e-14
	isoform_165967	0.086	4.83	5.15738	1.78447e-14
	isoform_255267	5.513	19.856	1.67757	1.91367e-14
	isoform_30985	2.323	8.266	1.67644	1.97975e-14
	isoform_155329	7.063	60.543	2.86542	1.99427e-14
	isoform_35246	1.893	7.83	1.88459	2.21375e-14
	isoform_91205	0	101.933	7.56895	2.21419e-14
	isoform_56000	7.973	122.383	3.64773	2.2725e-14
	isoform_56525	13.243	46.816	1.6501	2.27617e-14
	isoform_293815	0.393	3.376	2.88502	2.28124e-14
	isoform_89299	7.21	22.323	1.46993	2.29863e-14
	isoform_189145	0.19	8.726	4.92251	2.33243e-14
	isoform_103674	0.31	11.05	4.68033	2.49664e-14
	isoform_225228	3.776	16.33	1.93731	2.55434e-14
	isoform_174007	3.653	12.39	1.59383	2.55542e-14
	isoform_87123	1.323	29.686	4.14719	2.57391e-14
	isoform_86249	296.266	1963.45	2.52648	2.60906e-14
	isoform_204675	2.69	9.05	1.59399	2.65865e-14
	isoform_88715	45.313	195.283	1.93834	2.65865e-14
	isoform_85573	0	10.466	6.88122	2.75013e-14
	isoform_262299	0.316	5.886	3.8887	2.75967e-14
	isoform_315801	0.116	6.226	5.06755	2.93139e-14
	isoform_72233	2.076	11.45	2.3044	3.09916e-14
	isoform_112066	5.86	51.226	2.90723	3.13769e-14
	isoform_27585	14.69	69.786	2.08689	3.17604e-14
	isoform_41639	0.013	5.183	6.87763	3.21743e-14
	isoform_105869	1.466	16.373	3.21106	3.24011e-14
	isoform_241105	0.49	4.66	3.02549	3.4029e-14
	isoform_172881	0.34	7.09	4.02456	3.44455e-14
	isoform_111864	15.996	81.06	2.15837	3.51279e-14
	isoform_290085	3.646	8.323	1.03963	3.55871e-14
	isoform_350388	0.126	7.92	5.28332	3.60389e-14
	isoform_215598	0.556	5.473	3.02643	3.6048e-14
	isoform_347244	0.433	7.003	3.71238	3.71309e-14
	isoform_35426	1.496	12.693	2.87227	3.79623e-14
	isoform_20915	49.97	133.413	1.25866	3.7972e-14
	isoform_307725	1.203	7.88	2.52306	3.81245e-14
	isoform_143940	0.306	5.55	3.82352	4.04867e-14
	isoform_99431	0.19	10.97	5.30085	4.14435e-14
	isoform_327804	2.933	7.44	1.18816	4.24537e-14
	isoform_311899	2.05	7.423	1.70612	4.2605e-14
	isoform_77760	0.056	6.863	5.86823	4.46441e-14
	isoform_18256	0.61	11.626	3.94012	4.49634e-14
	isoform_314340	0.79	6.703	2.88964	4.65288e-14
	isoform_349747	1.15	7.893	2.61641	4.68796e-14
	isoform_1882	0.743	3.383	2.01451	4.69666e-14
	isoform_151631	2.623	11.17	1.92072	4.76693e-14
	isoform_250814	0.663	12.216	3.90135	4.87749e-14
	isoform_274163	5.013	120.803	4.20552	5.05249e-14
	isoform_107663	0.873	12.72	3.60938	5.07139e-14
	isoform_46481	2.89	10.26	1.68199	5.22554e-14
	isoform_194726	0	8.636	6.78859	5.25317e-14
	isoform_209448	0.946	16.083	3.76437	5.29881e-14
	isoform_216298	0.796	5.23	2.51258	5.32947e-14
	isoform_281571	3.033	10.793	1.67428	5.32947e-14
	isoform_46495	5.676	24.453	1.93898	5.33074e-14
	isoform_331253	1.44	5.733	1.82082	5.34989e-14
	isoform_149867	0.73	13.783	3.91176	5.55366e-14
	isoform_314532	1.07	9.746	2.98554	5.59197e-14
	isoform_336649	5.17	18.623	1.68573	5.64286e-14
	isoform_48784	0.59	7.83	3.49721	5.97734e-14
	isoform_315643	0	6.453	6.81021	6.34452e-14
	isoform_295019	1.103	9.903	2.94856	6.44211e-14
	isoform_281637	1.626	7.713	2.0664	6.56805e-14
	isoform_55678	0.086	5.853	5.28043	6.64997e-14
	isoform_44755	0	4.25	6.68952	6.664e-14
	isoform_294607	2.09	13.313	2.46092	6.68031e-14
	isoform_22960	1.086	6.323	2.35428	6.74903e-14
	isoform_53674	9.853	80.31	2.80594	7.06697e-14
	isoform_237807	3.356	8.903	1.25777	7.213e-14
	isoform_279145	0.976	6.543	2.59572	7.35138e-14
	isoform_246014	0.883	30.873	4.62533	7.53598e-14
	isoform_333479	1.01	5.856	2.34671	7.55362e-14
	isoform_345392	1.576	12.116	2.73915	7.58083e-14
	isoform_901	0.29	2.266	2.77895	7.70467e-14
	isoform_283632	0.813	4.723	2.36206	8.09127e-14
	isoform_81390	4.596	14.636	1.51469	8.28368e-14
	isoform_181079	0.353	2.673	2.70019	8.56074e-14
	isoform_65630	16.87	75.33	1.99345	8.56551e-14
	isoform_39994	10.586	31.29	1.40398	8.69599e-14
	isoform_83940	1.48	10.796	2.64494	8.7256e-14
	isoform_3552	0.643	3.693	2.32395	8.73153e-14
	isoform_45818	0	4.946	6.77437	8.73153e-14
	isoform_46814	5.97	71.796	3.30997	8.79045e-14
	isoform_80092	3.726	29.256	2.75349	9.38872e-14
	isoform_77653	1.553	12.173	2.77386	9.4703e-14
	isoform_190019	0.52	3.773	2.70156	9.66021e-14
	isoform_41111	3.03	9.916	1.55158	9.66021e-14
	isoform_290704	0	6.21	6.73318	9.70218e-14
	isoform_34758	0	3.763	6.71257	9.73221e-14
	isoform_106836	0.336	14.49	4.86418	9.92063e-14
	isoform_85545	1.053	8.25	2.76593	1.0441e-13
	isoform_105215	24.476	174.43	2.6034	1.13436e-13
	isoform_30794	5.42	24.776	2.01253	1.16568e-13
	isoform_44971	0.023	4.596	6.24056	1.20218e-13
	isoform_171283	0.436	7.866	3.85714	1.20446e-13
	isoform_217534	5.383	52.676	3.08784	1.2375e-13
	isoform_200807	0.136	3.253	4.13472	1.24511e-13
	isoform_241389	0.713	8.486	3.33147	1.26133e-13
	isoform_315718	1.093	6.61	2.40159	1.30594e-13
	isoform_95470	5.273	31.226	2.36793	1.30991e-13
	isoform_205373	1.313	8.963	2.56173	1.44516e-13
	isoform_20722	0	2.853	6.664	1.47927e-13
	isoform_282632	1.35	5.09	1.75273	1.54082e-13
	isoform_272359	0.896	6.233	2.5991	1.56163e-13
	isoform_31369	2.186	69.84	4.50262	1.59218e-13
	isoform_39468	0	4.216	6.71557	1.62233e-13
	isoform_170711	0	5.873	6.83369	1.62618e-13
	isoform_264504	3.103	22.51	2.65775	1.62618e-13
	isoform_101038	126.02	422.52	1.5784	1.62643e-13
	isoform_274307	3.636	12.71	1.64584	1.64483e-13
	isoform_220096	2.773	13.16	2.08794	1.65416e-13
	isoform_133252	0.063	4.436	5.38939	1.67032e-13
	isoform_221082	0	1.96	6.61555	1.70813e-13
	isoform_154249	0.27	4.193	3.66528	1.71721e-13
	isoform_305707	0	3.95	6.73549	1.74999e-13
	isoform_17115	7.47	30.02	1.84575	1.75856e-13
	isoform_228756	0.736	18.61	4.25064	1.7768e-13
	isoform_173424	0.36	2.76	2.71715	1.78303e-13
	isoform_12493	8.456	61.006	2.63857	1.78503e-13
	isoform_168291	0.046	4.086	5.6474	1.78635e-13
	isoform_86587	1.343	8.72	2.5137	1.81139e-13
	isoform_189601	1.976	5.316	1.27145	1.83622e-13
	isoform_339483	0.333	5.333	3.66279	1.83622e-13
	isoform_64797	8.886	20.396	1.05032	1.8413e-13
	isoform_243404	0	4.2	6.68945	1.89873e-13
	isoform_51677	4.706	29.163	2.45173	1.97949e-13
	isoform_94551	12.273	56.506	2.02788	1.97949e-13
	isoform_308144	0.066	1.193	3.81114	2.01453e-13
	isoform_19595	3.13	10.256	1.55894	2.0521e-13
	isoform_115769	10.48	33.09	1.4965	2.06286e-13
	isoform_81659	0	7.356	6.67884	2.06986e-13
	isoform_18643	2.61	23.26	2.91281	2.07015e-13
	isoform_29652	2.663	14.68	2.27253	2.07015e-13
	isoform_287057	0.95	10.133	3.16465	2.08781e-13
	isoform_97699	0	8.77	6.63211	2.24969e-13
	isoform_73982	6.936	28.203	1.85905	2.37162e-13
	isoform_44969	0	4.356	6.66705	2.41513e-13
	isoform_269045	0.06	4.393	5.6473	2.42611e-13
	isoform_86912	0.14	6.58	4.83784	2.45927e-13
	isoform_108578	2.08	14.206	2.55899	2.46037e-13
	isoform_23798	1.08	6.133	2.34767	2.50152e-13
	isoform_283746	0.596	6.896	3.28729	2.56546e-13
	isoform_171873	0.746	6.86	2.99053	2.63433e-13
	isoform_271884	0.466	5.37	3.27874	2.72017e-13
	isoform_67582	7.306	43.39	2.39277	2.81102e-13
	isoform_49463	3.916	16.813	1.91815	2.82382e-13
	isoform_301546	1.2	4.41	1.71648	2.86944e-13
	isoform_75053	27.126	107.933	1.83136	2.87126e-13
	isoform_192303	0.033	2.496	5.35852	2.94895e-13
	isoform_212542	0.576	12.433	4.02478	3.01137e-13
	isoform_3830	25.626	63.64	1.15175	3.09078e-13
	isoform_323318	5.066	16.216	1.52915	3.15101e-13
	isoform_206990	1.17	9.976	2.87377	3.20999e-13
	isoform_60539	0.623	6.126	3.06224	3.22171e-13
	isoform_205600	0.916	10.596	3.26803	3.29765e-13
	isoform_349759	1.143	7.403	2.52087	3.44011e-13
	isoform_15142	8.906	57.613	2.50229	3.46874e-13
	isoform_257508	15.416	50.87	1.55886	3.63403e-13
	isoform_213224	13.513	45.11	1.57685	3.76208e-13
	isoform_77940	1.55	33.116	4.04194	3.86278e-13
	isoform_24848	1.35	6.333	2.06143	3.89252e-13
	isoform_18651	13.483	41.046	1.44925	3.92317e-13
	isoform_34548	4.103	62.306	3.62237	3.9302e-13
	isoform_230938	0.75	8.21	3.16003	3.93329e-13
	isoform_228990	16.88	60.563	1.67282	3.98326e-13
	isoform_26843	0	3.97	6.71227	4.02056e-13
	isoform_105010	11.223	35.116	1.48135	4.04591e-13
	isoform_6263	22.583	109.13	2.08255	4.24583e-13
	isoform_241180	0.383	3.963	3.12922	4.25717e-13
	isoform_240445	1.016	6.586	2.52073	4.47611e-13
	isoform_227696	89.433	472.85	2.21076	4.58266e-13
	isoform_117581	2.05	18.333	2.94197	4.71543e-13
	isoform_109102	104.126	583.916	2.29067	4.73418e-13
	isoform_72594	0.456	5.92	3.4559	4.77024e-13
	isoform_22725	4.886	23.663	2.09501	4.93094e-13
	isoform_83523	0.833	6.79	2.83939	4.9361e-13
	isoform_21234	0	3.046	6.62601	4.96666e-13
	isoform_65023	12.773	29.586	1.06007	5.05732e-13
	isoform_39528	15.46	64.57	1.88951	5.06063e-13
	isoform_59153	29.383	105.546	1.67796	5.07356e-13
	isoform_33341	0.736	12.656	3.7808	5.07946e-13
	isoform_2592	2.823	8.813	1.48431	5.12459e-13
	isoform_60600	0.196	5.103	4.2068	5.14899e-13
	isoform_41882	7.563	19.793	1.23584	5.18131e-13
	isoform_188258	1.06	6.326	2.38471	5.28877e-13
	isoform_272131	1.423	6.426	2.00354	5.39984e-13
	isoform_23979	2.59	10.66	1.88056	5.5356e-13
	isoform_153111	0.163	2.9	3.78796	5.63358e-13
	isoform_57629	0	6.816	6.71139	5.65572e-13
	isoform_95997	27.39	214.05	2.7382	5.68214e-13
	isoform_72411	1.543	13.47	2.92875	5.73269e-13
	isoform_167109	2.61	7.026	1.27953	5.80453e-13
	isoform_107927	0	10.49	6.55425	5.80703e-13
	isoform_29831	3.663	12.49	1.60893	5.94494e-13
	isoform_44262	3.046	13.17	1.9357	5.94494e-13
	isoform_102548	31.04	132.173	1.91361	5.98072e-13
	isoform_256661	0.103	6.373	5.16237	6.21512e-13
	isoform_180112	1.526	9.623	2.44664	6.36733e-13
	isoform_22706	5.916	14.413	1.13079	6.63382e-13
	isoform_8965	1.953	5.96	1.44986	6.63902e-13
	isoform_88197	4.113	13.273	1.54899	6.85747e-13
	isoform_146254	0.046	5.423	5.79284	6.97513e-13
	isoform_76844	0.386	16.103	4.76078	7.36935e-13
	isoform_203774	0.206	5.78	4.49011	7.41496e-13
	isoform_151378	0.246	7.466	4.38874	7.63592e-13
	isoform_188930	0.92	6.153	2.57903	7.70961e-13
	isoform_180363	1.353	3.92	1.38802	7.81837e-13
	isoform_252750	0.186	4.403	4.18821	7.8448e-13
	isoform_45899	8.68	40.403	2.04195	7.87093e-13
	isoform_305846	0.503	8.373	3.75079	7.91963e-13
	isoform_247987	2.286	6.93	1.44999	7.92552e-13
	isoform_349230	0	2.466	6.58613	7.92675e-13
	isoform_25371	10.923	25.446	1.07062	8.07685e-13
	isoform_70470	0.51	15.126	4.39263	8.24105e-13
	isoform_296019	49.983	1354.69	4.29614	8.3416e-13
	isoform_116779	56.68	496.093	2.88233	8.42256e-13
	isoform_200207	0.05	3.303	5.21913	8.4831e-13
	isoform_53735	7.15	94.336	3.4228	8.4831e-13
	isoform_71008	1.703	28.236	3.72672	8.50236e-13
	isoform_20817	2.19	22.316	3.09858	8.76693e-13
	isoform_134614	2.613	9.526	1.71311	9.14655e-13
	isoform_279880	1.83	5.906	1.53301	9.47059e-13
	isoform_36247	29.053	92.063	1.49078	9.49663e-13
	isoform_353802	1.133	5.79	2.18357	9.56087e-13
	isoform_46799	0.953	21.733	4.07195	9.94663e-13
	isoform_133322	0.043	4.87	5.58706	9.99739e-13
	isoform_28322	0	5.733	6.79072	1.01961e-12
	isoform_45282	1.01	8.1	2.77811	1.03708e-12
	isoform_264932	1.846	8.786	2.06177	1.07106e-12
	isoform_42146	12.653	56.24	1.97452	1.07106e-12
	isoform_271793	0.056	2.596	4.99724	1.08525e-12
	isoform_84351	0	5.806	6.46623	1.09214e-12
	isoform_229204	0.3	3.583	3.39078	1.10959e-12
	isoform_237427	3.126	10.87	1.64661	1.10961e-12
	isoform_136420	0.923	6.286	2.59813	1.15447e-12
	isoform_47148	2.663	45.673	3.75409	1.19313e-12
	isoform_199271	0.876	10.49	3.35385	1.2461e-12
	isoform_214356	0.7	5.253	2.72484	1.26939e-12
	isoform_28115	0.136	2.263	3.68486	1.32384e-12
	isoform_90955	0.483	6.893	3.5081	1.37229e-12
	isoform_227370	2.276	7.096	1.49269	1.3909e-12
	isoform_63136	0.066	6.34	5.57411	1.39651e-12
	isoform_201794	2.2	10.693	2.09819	1.46203e-12
	isoform_18029	1.02	7.83	2.71535	1.51266e-12
	isoform_291994	0.11	8.73	5.39426	1.54452e-12
	isoform_326100	0.46	5.1	3.19696	1.55567e-12
	isoform_36170	6.686	17.306	1.22614	1.60453e-12
	isoform_320854	0.74	4.043	2.28522	1.63307e-12
	isoform_349953	0.533	10.6	3.94216	1.64214e-12
	isoform_122521	15.723	100.113	2.45808	1.64435e-12
	isoform_62472	10.3	36.47	1.66167	1.64549e-12
	isoform_350667	0.093	5.996	5.30183	1.66854e-12
	isoform_121205	0	20.813	6.54608	1.68298e-12
	isoform_204034	1.663	7.036	1.91395	1.70449e-12
	isoform_320961	2.15	8.88	1.89942	1.74022e-12
	isoform_144132	2.44	9.173	1.75524	1.76351e-12
	isoform_236437	1.903	7.436	1.81062	1.89509e-12
	isoform_89750	7.553	64.436	2.84201	1.93992e-12
	isoform_61526	8.433	27.89	1.56847	1.95979e-12
	isoform_54781	0.45	6.236	3.52898	1.98814e-12
	isoform_202905	17.62	49.726	1.3386	1.98863e-12
	isoform_121330	50.306	215.493	1.92034	1.98975e-12
	isoform_11441	5.486	14.48	1.25014	2.02266e-12
	isoform_137377	0.613	5.03	2.83834	2.05637e-12
	isoform_139482	0.73	4.23	2.35697	2.08475e-12
	isoform_26305	0.126	5.403	4.87931	2.09258e-12
	isoform_299020	5.206	22.343	1.92355	2.09258e-12
	isoform_23540	11.676	50.72	1.94316	2.10954e-12
	isoform_14350	2.816	14.576	2.17429	2.1096e-12
	isoform_44	1.806	8.003	1.96991	2.16688e-12
	isoform_63571	0	4.713	6.47144	2.18734e-12
	isoform_236040	9.18	32.506	1.65718	2.2026e-12
	isoform_174124	1.81	18.543	3.1061	2.20981e-12
	isoform_226088	0.23	9.313	4.71037	2.22899e-12
	isoform_251448	2.113	9.366	1.96088	2.27933e-12
	isoform_324239	7.26	36.826	2.16673	2.34936e-12
	isoform_5221	0.68	4.083	2.38026	2.48132e-12
	isoform_32069	0.746	6.12	2.79474	2.53956e-12
	isoform_35961	0.79	9.923	3.38626	2.53956e-12
	isoform_3928	0.976	3.96	1.85815	2.587e-12
	isoform_39838	5.493	16.146	1.40761	2.5946e-12
	isoform_20876	1.42	6.22	1.95311	2.70937e-12
	isoform_40727	3.566	13.43	1.74691	2.78287e-12
	isoform_34531	1.913	13.69	2.63113	2.79517e-12
	isoform_23943	4.51	12.573	1.31317	2.81576e-12
	isoform_242896	0.033	7.813	5.93848	2.84301e-12
	isoform_350748	3.81	16.426	1.9245	2.91618e-12
	isoform_152004	3.78	13.563	1.67369	2.99267e-12
	isoform_9338	8.913	24.643	1.31085	2.99962e-12
	isoform_260612	8.523	24.203	1.35455	3.02255e-12
	isoform_18564	0.77	7.23	2.98978	3.06554e-12
	isoform_111018	1.726	19.19	3.22416	3.06711e-12
	isoform_222387	0.856	11.293	3.41151	3.08465e-12
	isoform_341508	3.06	13.84	1.99824	3.08937e-12
	isoform_179561	0.326	7.37	4.18661	3.17802e-12
	isoform_336803	0.013	2.73	5.82743	3.2438e-12
	isoform_9813	3.42	8.246	1.11866	3.36461e-12
	isoform_38561	1.15	26.92	4.11133	3.71308e-12
	isoform_8475	2.32	6.333	1.30419	3.71308e-12
	isoform_113884	427.16	1184.94	1.31173	3.71417e-12
	isoform_176261	1.796	6.956	1.79065	3.83262e-12
	isoform_205150	0.363	3.953	3.22822	3.83262e-12
	isoform_63589	0.663	14.286	4.04506	3.95421e-12
	isoform_34680	0.363	3.833	3.20569	3.95625e-12
	isoform_105110	0.086	9.383	5.58763	3.97648e-12
	isoform_31394	11.346	46.43	1.85207	4.02954e-12
	isoform_81664	12.05	35.343	1.39773	4.03225e-12
	isoform_312457	0.496	11.056	4.06099	4.04889e-12
	isoform_1186	0.983	13.77	3.5032	4.17422e-12
	isoform_220509	1.143	4.43	1.79628	4.1855e-12
	isoform_49373	0.826	6.26	2.70958	4.20623e-12
	isoform_88725	3.246	41.313	3.38975	4.24861e-12
	isoform_311676	0.12	3.496	4.38279	4.42565e-12
	isoform_218987	0.686	5.35	2.75745	4.49598e-12
	isoform_139596	1.16	5.83	2.14846	4.5918e-12
	isoform_203401	1.693	11.37	2.54248	4.59189e-12
	isoform_230900	0.29	7.48	4.20039	4.65817e-12
	isoform_155516	29.513	90.723	1.46493	4.65953e-12
	isoform_250406	0.03	2.37	5.22137	4.73015e-12
	isoform_278815	3.82	9.146	1.1105	4.82403e-12
	isoform_205686	0.606	5.233	2.93267	4.8588e-12
	isoform_254422	0.253	2.893	3.2115	4.8907e-12
	isoform_224031	0.303	3.346	3.16887	4.91963e-12
	isoform_70370	11.04	123.323	3.22044	4.95838e-12
	isoform_331460	0.043	2.346	5.00889	4.99873e-12
	isoform_240289	5.776	18.89	1.54689	5.02091e-12
	isoform_109894	0.086	8.656	5.41128	5.06944e-12
	isoform_66400	4.936	20.453	1.8842	5.15334e-12
	isoform_20849	13.266	32.61	1.15012	5.24853e-12
	isoform_27676	0.356	4.246	3.2955	5.24926e-12
	isoform_348036	0.39	3.413	2.8829	5.26861e-12
	isoform_5892	0	2.73	6.58428	5.41057e-12
	isoform_64066	3.57	26.55	2.69033	5.41057e-12
	isoform_177151	13.56	75.98	2.29715	5.42743e-12
	isoform_327907	1.916	18.96	3.0756	5.47682e-12
	isoform_184372	1.233	9.86	2.80163	5.53126e-12
	isoform_315935	13.506	49.603	1.70195	5.63435e-12
	isoform_186404	3.37	8.19	1.12828	5.64567e-12
	isoform_60186	20.883	48.556	1.06286	5.80653e-12
	isoform_95387	0.11	6.916	5.19667	6.04871e-12
	isoform_2815	2.896	8.246	1.34786	6.06714e-12
	isoform_59745	0	4.49	6.41705	6.0938e-12
	isoform_22898	16.42	91.123	2.29494	6.23007e-12
	isoform_6253	0.003	2.873	6.58726	6.27522e-12
	isoform_298820	0.383	4.49	3.3096	6.45901e-12
	isoform_237417	0.166	6.246	4.56861	6.49026e-12
	isoform_92077	2.086	14.07	2.56604	6.53874e-12
	isoform_160217	0.753	4.583	2.44002	6.53982e-12
	isoform_42321	2.39	22.676	2.98913	6.72033e-12
	isoform_219445	0.783	14.256	3.81118	7.173e-12
	isoform_322143	1.646	5.396	1.5522	7.52698e-12
	isoform_17577	0.046	9.82	6.11293	7.56817e-12
	isoform_271221	0.1	3.56	4.80216	7.5768e-12
	isoform_293565	3.566	20.496	2.33522	7.66679e-12
	isoform_77640	5.12	38.223	2.69273	7.76556e-12
	isoform_57941	5.546	20.473	1.72923	7.87359e-12
	isoform_333344	1.956	7.016	1.68082	7.9345e-12
	isoform_198310	6.383	15.476	1.11895	8.09584e-12
	isoform_76323	3.496	14.136	1.85513	8.58098e-12
	isoform_49126	1.743	8.406	2.10526	8.61442e-12
	isoform_10861	8.616	34.573	1.8255	8.62647e-12
	isoform_77805	1.28	8.566	2.52148	8.84791e-12
	isoform_353401	0	4.13	6.29484	8.90743e-12
	isoform_52737	2.6	46.436	3.79561	8.93007e-12
	isoform_180240	0.14	3.18	4.19785	8.9518e-12
	isoform_90401	10.22	28.246	1.30568	9.11734e-12
	isoform_276974	0.76	7.746	3.09356	9.18913e-12
	isoform_288888	0.6	11.816	3.91175	9.3287e-12
	isoform_246591	0.016	3.21	5.76085	9.70555e-12
	isoform_148108	0.273	10.086	4.76311	9.75444e-12
	isoform_52076	0	3.31	6.29745	9.85457e-12
	isoform_152204	0.776	25.663	4.50065	9.88216e-12
	isoform_313729	0.373	3.373	2.952	9.9452e-12
	isoform_99874	0.46	24.7	4.97155	1.00378e-11
	isoform_322676	1.47	10.393	2.58803	1.00885e-11
	isoform_174284	2.643	10.673	1.84608	1.02009e-11
	isoform_24872	0	4.88	6.59574	1.03301e-11
	isoform_51170	24.01	110.06	2.01639	1.05236e-11
	isoform_303782	0	3.58	6.27586	1.05602e-11
	isoform_42290	0.553	5.876	3.17084	1.05923e-11
	isoform_268494	2.013	9.606	2.08551	1.06247e-11
	isoform_287359	0.506	4.28	2.89901	1.08789e-11
	isoform_17090	2.77	11.183	1.84071	1.09163e-11
	isoform_26935	4.756	12.353	1.22933	1.13022e-11
	isoform_35953	1.33	13.473	3.08297	1.13239e-11
	isoform_290397	0.07	6.276	5.35734	1.14066e-11
	isoform_295041	1.163	9.996	2.88739	1.21486e-11
	isoform_52441	1.796	11.443	2.46954	1.21507e-11
	isoform_28563	11.476	41.683	1.69766	1.21957e-11
	isoform_210835	0.183	6.03	4.5351	1.22785e-11
	isoform_193841	0.58	6.48	3.21289	1.26612e-11
	isoform_37936	0.003	2.84	6.30555	1.26628e-11
	isoform_132745	42.866	433.623	3.06716	1.28085e-11
	isoform_198708	0.703	19.863	4.31838	1.28796e-11
	isoform_9015	3.18	7.726	1.12419	1.28796e-11
	isoform_348476	1.67	5.19	1.47546	1.32008e-11
	isoform_36925	0	4.326	6.45681	1.33149e-11
	isoform_208718	1.006	20.853	3.99571	1.37442e-11
	isoform_85638	59.88	502.84	2.82397	1.37769e-11
	isoform_100675	2.02	55.98	4.29857	1.37853e-11
	isoform_268444	1.47	5.206	1.66326	1.39882e-11
	isoform_258172	2.53	29.696	3.26639	1.40146e-11
	isoform_9801	2.47	11.656	2.07158	1.41165e-11
	isoform_146229	1.6	7.54	2.05866	1.42856e-11
	isoform_300269	0.353	3.67	3.09716	1.44891e-11
	isoform_86544	0.4	11.776	4.41023	1.46528e-11
	isoform_324328	3.853	12.883	1.57149	1.48752e-11
	isoform_138285	0.683	5.643	2.80551	1.4952e-11
	isoform_257979	1.626	9.623	2.37912	1.49604e-11
	isoform_149218	0.72	16.97	4.13592	1.50226e-11
	isoform_2878	1.266	3.556	1.34033	1.52291e-11
	isoform_278323	0.02	1.536	5.13042	1.53677e-11
	isoform_167917	8.066	41.973	2.17881	1.65157e-11
	isoform_313608	2.063	7.193	1.63952	1.68923e-11
	isoform_320579	0.063	3.606	5.13949	1.71417e-11
	isoform_353585	0.293	3.64	3.33214	1.75551e-11
	isoform_189058	1.316	5.87	1.98089	1.7886e-11
	isoform_285857	0.8	4.716	2.37831	1.87983e-11
	isoform_181261	1.1	7.84	2.61021	1.90082e-11
	isoform_41156	3.28	18.193	2.29276	1.94509e-11
	isoform_244121	1.32	12.676	3.01051	1.96035e-11
	isoform_280815	3.65	10.343	1.3562	1.96035e-11
	isoform_27172	1.076	4.763	1.96812	1.96837e-11
	isoform_204236	2.39	8.67	1.70035	1.98438e-11
	isoform_203762	7.8	50.67	2.50463	2.00522e-11
	isoform_112476	0.076	8.91	5.69476	2.02568e-11
	isoform_25591	3.226	41.106	3.36768	2.03206e-11
	isoform_289860	0.523	2.566	2.12318	2.04958e-11
	isoform_165618	0.483	2.246	2.06202	2.11156e-11
	isoform_317775	0.966	5.273	2.25279	2.13358e-11
	isoform_181182	0	5.156	6.24055	2.18583e-11
	isoform_340963	0.393	3.31	2.87043	2.2005e-11
	isoform_291382	1.313	5.27	1.82942	2.22108e-11
	isoform_340105	1.833	6.873	1.74585	2.27001e-11
	isoform_289997	0.23	7.12	4.47686	2.30657e-11
	isoform_286463	3.236	11.203	1.63943	2.31224e-11
	isoform_44905	4.14	15.76	1.77182	2.36613e-11
	isoform_265043	2.873	19.866	2.58659	2.37482e-11
	isoform_185176	0.526	8.36	3.64968	2.41869e-11
	isoform_205765	1.773	8.643	2.10821	2.50024e-11
	isoform_38548	34.19	80.323	1.08337	2.50715e-11
	isoform_252800	0.673	6.023	2.91462	2.54481e-11
	isoform_257360	0.303	9.443	4.36359	2.55304e-11
	isoform_75707	195.523	961.796	2.09714	2.65547e-11
	isoform_344335	0.18	3.296	3.78925	2.66398e-11
	isoform_208669	0.72	3.223	1.97904	2.67534e-11
	isoform_149538	1.34	6.943	2.17986	2.69105e-11
	isoform_21542	8.063	20.733	1.2046	2.72393e-11
	isoform_95905	0.436	9.75	4.07814	2.73616e-11
	isoform_79230	9.35	25.05	1.26386	2.74737e-11
	isoform_253951	1.516	4.023	1.26044	2.75687e-11
	isoform_227252	0.18	5.32	4.31868	2.76399e-11
	isoform_215218	0	3.146	6.22032	2.79031e-11
	isoform_233750	0.096	4.55	4.76702	2.80207e-11
	isoform_98253	1.633	9.38	2.35534	2.813e-11
	isoform_199693	2.306	9.586	1.87063	2.89325e-11
	isoform_267668	0.016	4.4	5.8659	2.93401e-11
	isoform_168446	1.516	3.876	1.20794	2.97848e-11
	isoform_39449	13.22	43.38	1.56169	3.04075e-11
	isoform_139403	0.363	7.62	4.00892	3.05131e-11
	isoform_340994	0.45	1.606	1.67106	3.14434e-11
	isoform_183739	0	2.013	6.29545	3.14471e-11
	isoform_15080	0	3.003	6.35118	3.14755e-11
	isoform_225493	1.483	20.396	3.47412	3.15129e-11
	isoform_51580	2.136	15.83	2.65908	3.15129e-11
	isoform_175810	1.276	23.296	3.82256	3.1597e-11
	isoform_27009	1.896	17.643	2.94211	3.20459e-11
	isoform_6123	2.223	10.29	2.02983	3.23767e-11
	isoform_37113	0.49	3.203	2.53407	3.24885e-11
	isoform_139033	0.183	9.91	4.971	3.3103e-11
	isoform_58079	23.773	454.2	3.86604	3.31409e-11
	isoform_62018	0.066	4.61	5.24812	3.32618e-11
	isoform_271750	1.63	7.523	2.03128	3.36236e-11
	isoform_249761	0.64	5.7	2.90012	3.3675e-11
	isoform_113106	0.586	34.763	5.05096	3.37477e-11
	isoform_96316	3.56	64.15	3.79641	3.41502e-11
	isoform_178320	0.476	12.24	4.22606	3.41878e-11
	isoform_261112	0.27	2.183	2.82436	3.4307e-11
	isoform_97358	34.963	118.756	1.60017	3.4503e-11
	isoform_258584	4.17	30.253	2.64528	3.55454e-11
	isoform_207064	0	1.86	6.19203	3.61041e-11
	isoform_343472	3.68	16.146	1.95847	3.66615e-11
	isoform_192430	0	4.83	6.1836	3.69704e-11
	isoform_310301	0.44	1.756	1.84176	3.69955e-11
	isoform_318367	2.026	10.246	2.13518	3.70168e-11
	isoform_46759	0.756	9.046	3.27744	3.76835e-11
	isoform_180396	0.97	4.13	1.94857	3.83317e-11
	isoform_247222	16.023	65.886	1.86029	3.88963e-11
	isoform_252289	0.57	6.38	3.1866	3.89444e-11
	isoform_97567	0	5.99	6.18969	3.89444e-11
	isoform_318034	1.656	10.706	2.50506	3.97539e-11
	isoform_119528	1.616	21.036	3.4587	4.18045e-11
	isoform_157049	1.726	6.406	1.73311	4.19345e-11
	isoform_61801	1.67	9.51	2.31205	4.21348e-11
	isoform_202419	4.333	94.833	4.0256	4.21802e-11
	isoform_262861	0.483	7.53	3.76662	4.24434e-11
	isoform_83665	50.186	1173.15	4.08518	4.24764e-11
	isoform_5515	4.473	21.716	2.08596	4.24979e-11
	isoform_69337	7.246	20.636	1.35366	4.25196e-11
	isoform_335358	0.756	8.8	3.23955	4.29642e-11
	isoform_129879	1.476	37.653	4.28305	4.31467e-11
	isoform_36604	0.59	15.03	4.17063	4.32192e-11
	isoform_93649	0.443	8	3.74785	4.32192e-11
	isoform_338202	0	2.013	6.27845	4.3767e-11
	isoform_21558	0	4.036	6.41936	4.39044e-11
	isoform_4932	0.843	14.333	3.72899	4.3933e-11
	isoform_288923	0.7	5.23	2.66919	4.47805e-11
	isoform_30030	2.433	9.866	1.85011	4.52453e-11
	isoform_76307	1.453	21.38	3.54219	4.52453e-11
	isoform_316313	0.063	6.49	5.33697	4.52856e-11
	isoform_220350	2.446	7.28	1.41416	4.58752e-11
	isoform_14683	1.513	5.1	1.59415	4.6033e-11
	isoform_246029	0.42	6.726	3.65409	4.62571e-11
	isoform_342743	0.083	5.176	5.04038	4.64447e-11
	isoform_90095	0.46	9.983	4.09066	4.65764e-11
	isoform_300536	0.473	3.72	2.72976	4.69518e-11
	isoform_45184	0.01	5.376	6.4206	4.70814e-11
	isoform_1499	0.07	1.136	3.69631	4.79768e-11
	isoform_214371	0.163	2	3.37105	4.85692e-11
	isoform_11554	1.646	5.773	1.64934	4.92294e-11
	isoform_42357	0	3.07	6.23351	4.96112e-11
	isoform_207312	1.523	4.243	1.3277	5.02162e-11
	isoform_47196	2.273	13.05	2.32587	5.09769e-11
	isoform_53536	0.283	5.143	3.79131	5.14203e-11
	isoform_333554	0.293	2.84	3.00694	5.14342e-11
	isoform_160600	2.973	11.176	1.7533	5.3805e-11
	isoform_216102	0.483	4.856	3.12345	5.4446e-11
	isoform_244846	0.68	5.68	2.85578	5.4446e-11
	isoform_6294	0.253	2.233	2.90381	5.4446e-11
	isoform_169597	0.516	6.473	3.34118	5.45113e-11
	isoform_66757	0	5.856	6.33293	5.61744e-11
	isoform_51722	13.74	64.436	2.05855	5.63222e-11
	isoform_247113	0.493	4.67	2.97682	5.75119e-11
	isoform_310645	7.113	17.18	1.11633	5.77091e-11
	isoform_904	7.253	20.693	1.36578	5.88841e-11
	isoform_226671	0.446	12.64	4.36325	6.02721e-11
	isoform_80843	0.566	11.066	3.93826	6.15137e-11
	isoform_20443	5.62	17.086	1.44015	6.15703e-11
	isoform_248655	0.866	11.533	3.40638	6.15703e-11
	isoform_26134	7.516	26.38	1.63717	6.15705e-11
	isoform_76193	13.486	34.156	1.19217	6.17356e-11
	isoform_59600	2.996	14.886	2.12021	6.2449e-11
	isoform_71542	1.55	13.696	2.91827	6.31771e-11
	isoform_13136	2.236	12.576	2.28663	6.5646e-11
	isoform_342713	0.093	5.32	5.09162	6.68108e-11
	isoform_53312	1.813	46.973	4.21001	6.85359e-11
	isoform_163700	0.223	6.563	4.36495	6.95809e-11
	isoform_144702	0.336	2.886	2.88427	7.04953e-11
	isoform_56083	9.11	28.06	1.45597	7.10813e-11
	isoform_352481	2.143	5.703	1.25781	7.21689e-11
	isoform_123679	43.623	157.336	1.6753	7.36077e-11
	isoform_14524	2.383	8.41	1.66008	7.36077e-11
	isoform_101137	2.466	43.163	3.73969	7.3657e-11
	isoform_174545	3.45	8.23	1.10374	7.37977e-11
	isoform_187190	2.916	13.253	1.99967	7.39887e-11
	isoform_318490	0.48	16.303	4.4816	7.42018e-11
	isoform_31410	6.4	19.413	1.44367	7.47631e-11
	isoform_344025	4.516	12.343	1.29256	7.4949e-11
	isoform_349863	2.333	13.603	2.33748	7.97245e-11
	isoform_23235	4.606	12.693	1.30273	7.9867e-11
	isoform_146222	1.16	8.436	2.64375	8.01858e-11
	isoform_45779	0	3.706	6.25052	8.12472e-11
	isoform_249886	0.543	26.74	4.76513	8.23031e-11
	isoform_17303	0.873	8.533	3.01402	8.36265e-11
	isoform_25083	0	3.013	6.27774	8.36265e-11
	isoform_274828	0.533	3.05	2.32184	8.48076e-11
	isoform_330536	1.906	30.043	3.61049	8.54693e-11
	isoform_64509	0.15	6.586	4.70757	8.60591e-11
	isoform_183230	6.82	15.843	1.06124	8.85447e-11
	isoform_22307	1.066	9.643	2.94243	9.26249e-11
	isoform_273585	0.966	7.73	2.77731	9.34614e-11
	isoform_157291	0.89	6.686	2.69297	9.34782e-11
	isoform_69058	0	6.936	6.27511	9.35813e-11
	isoform_72270	1.686	10.693	2.45955	9.36379e-11
	isoform_279079	0.006	4.68	6.08837	9.58051e-11
	isoform_65022	0	3.213	6.08548	9.61924e-11
	isoform_42447	2.393	15.29	2.47307	9.70826e-11
	isoform_112065	0.456	12.29	4.19846	9.74389e-11
	isoform_280365	1.94	5.77	1.42387	9.81366e-11
	isoform_318175	0.23	8.276	4.51691	9.89925e-11
	isoform_252068	0.833	4.55	2.26611	9.98023e-11
	isoform_31327	2.796	15.006	2.24541	1.0451e-10
	isoform_167828	9.06	49.733	2.26675	1.05574e-10
	isoform_227674	0.123	3.193	4.15969	1.05574e-10
	isoform_201797	1.146	6.18	2.23096	1.05853e-10
	isoform_289641	0.2	3.14	3.60122	1.06236e-10
	isoform_299135	0.113	11.656	5.49121	1.09501e-10
	isoform_351762	0.343	2.806	2.81025	1.10793e-10
	isoform_73302	2.973	42.546	3.50263	1.12609e-10
	isoform_185003	3.166	31.086	3.01952	1.14352e-10
	isoform_99317	1.316	48.79	4.56048	1.15818e-10
	isoform_325378	0.82	7.703	2.95745	1.16955e-10
	isoform_53786	0	5.486	6.31343	1.25373e-10
	isoform_1791	1.223	5.243	1.93104	1.25639e-10
	isoform_281976	1.41	6.606	2.04376	1.25639e-10
	isoform_237977	0.86	11.603	3.4369	1.25997e-10
	isoform_182988	0.533	5.136	3.02003	1.26134e-10
	isoform_312374	0.583	7.66	3.41864	1.26401e-10
	isoform_90831	1.683	10.856	2.46982	1.27869e-10
	isoform_310491	7.816	19.046	1.1405	1.28712e-10
	isoform_99052	4.413	125.826	4.28272	1.29471e-10
	isoform_13722	0.46	2.943	2.45277	1.30563e-10
	isoform_18769	1.473	7.27	2.12548	1.30891e-10
	isoform_233988	14.676	33.216	1.02344	1.31322e-10
	isoform_170813	7.84	27.743	1.66447	1.32265e-10
	isoform_222675	0.073	2.586	4.67689	1.33372e-10
	isoform_256273	0.583	7.69	3.38116	1.3562e-10
	isoform_67094	0.126	11.96	5.36558	1.37758e-10
	isoform_48429	5.963	31.186	2.18168	1.39401e-10
	isoform_188926	2.5	12.703	2.14703	1.39497e-10
	isoform_298044	0.123	6.84	4.95674	1.40805e-10
	isoform_208291	0	3.973	6.10761	1.43682e-10
	isoform_236548	1.73	6.143	1.66193	1.44451e-10
	isoform_84394	2.36	8.743	1.72613	1.44841e-10
	isoform_60514	1.016	8.7	2.86754	1.48051e-10
	isoform_236755	0.956	4.206	1.96181	1.4819e-10
	isoform_300781	0.776	4.68	2.38579	1.48199e-10
	isoform_273210	1.173	2.91	1.15496	1.48248e-10
	isoform_33242	51.163	153.88	1.41892	1.49138e-10
	isoform_201430	0.343	4.976	3.48987	1.49993e-10
	isoform_37327	0.64	15.466	4.10284	1.50896e-10
	isoform_97341	4.77	38.21	2.77454	1.50896e-10
	isoform_105663	1.476	12.513	2.87094	1.52883e-10
	isoform_22015	3.11	11.863	1.77374	1.55257e-10
	isoform_198617	0.646	12.76	3.83448	1.55682e-10
	isoform_60957	12.053	34.403	1.34373	1.57217e-10
	isoform_185857	3.74	13.38	1.66702	1.57288e-10
	isoform_71656	6.4	16.72	1.22591	1.5816e-10
	isoform_231561	0.636	10.093	3.6455	1.59487e-10
	isoform_321889	2.94	7.41	1.18316	1.63376e-10
	isoform_257941	1.16	6.956	2.37676	1.64355e-10
	isoform_113968	23.703	155.113	2.47156	1.66278e-10
	isoform_93137	0.03	5.136	5.52947	1.674e-10
	isoform_225327	0.746	10.93	3.525	1.69952e-10
	isoform_24843	0	3.68	6.29787	1.71527e-10
	isoform_194698	0.12	6.206	4.80793	1.75163e-10
	isoform_328830	0.273	1.896	2.61023	1.79276e-10
	isoform_1255	7.043	19.833	1.34001	1.79301e-10
	isoform_42259	0.82	6.27	2.72426	1.7996e-10
	isoform_201689	1.2	4.78	1.81885	1.80208e-10
	isoform_198983	1.226	6.253	2.16619	1.84178e-10
	isoform_100808	72.523	690.8	2.98215	1.87392e-10
	isoform_101851	0.083	6.82	5.24099	1.9646e-10
	isoform_307932	3.216	10.63	1.55556	1.99493e-10
	isoform_112092	44.363	111.233	1.1658	1.99526e-10
	isoform_31885	319.736	1243.29	1.7721	2.03366e-10
	isoform_319239	14.206	59.5	1.88991	2.03422e-10
	isoform_156534	14.596	83.313	2.2896	2.04307e-10
	isoform_26150	0.763	5.896	2.71084	2.04326e-10
	isoform_237163	2.166	6.1	1.33275	2.09055e-10
	isoform_94356	10.306	71.046	2.57391	2.12608e-10
	isoform_157790	0	1.593	6.00417	2.13679e-10
	isoform_102876	15.186	80.54	2.22109	2.17782e-10
	isoform_231294	1.526	4.27	1.33126	2.23494e-10
	isoform_220059	2.77	12.73	2.00868	2.23516e-10
	isoform_258291	0.573	2.016	1.63826	2.24938e-10
	isoform_67826	0.566	5.843	3.14303	2.26708e-10
	isoform_67508	0.06	3.056	4.77499	2.26736e-10
	isoform_69635	0.426	4.473	3.08983	2.2864e-10
	isoform_169066	0.026	2.733	5.36243	2.29773e-10
	isoform_307972	0.89	3.203	1.69544	2.40747e-10
	isoform_24890	7.826	43.01	2.27293	2.42144e-10
	isoform_181090	0.463	9.18	3.87245	2.45777e-10
	isoform_224198	0.493	10.32	3.93993	2.45958e-10
	isoform_255903	0	4.43	6.04462	2.47515e-10
	isoform_228177	0.276	2.04	2.66644	2.4799e-10
	isoform_19701	0.716	5.623	2.74518	2.51456e-10
	isoform_185758	0.223	5.483	4.19716	2.53569e-10
	isoform_66056	1.263	7.023	2.29244	2.55768e-10
	isoform_145276	0.233	2.983	3.36668	2.60619e-10
	isoform_79396	6.23	45.353	2.63291	2.6267e-10
	isoform_25001	2.476	7.176	1.38304	2.66538e-10
	isoform_110514	17.116	43.446	1.18309	2.7106e-10
	isoform_352120	0.103	2.466	4.13389	2.7106e-10
	isoform_74918	0	6.36	6.2123	2.7106e-10
	isoform_272305	0.426	4.816	3.23722	2.73309e-10
	isoform_273342	0	2.59	6.05554	2.74882e-10
	isoform_141599	4.536	63.606	3.45934	2.75004e-10
	isoform_263550	1.313	3.69	1.34277	2.75004e-10
	isoform_275065	1.42	4.433	1.48189	2.79143e-10
	isoform_59370	1.52	10.576	2.57917	2.87218e-10
	isoform_59540	3.78	16.136	1.92004	2.87255e-10
	isoform_37038	0.29	3.1	3.13625	2.91671e-10
	isoform_291101	0	1.93	5.99336	2.94305e-10
	isoform_78151	1.76	9.77	2.26848	2.96034e-10
	isoform_202354	0.096	3.89	4.7507	2.97088e-10
	isoform_84901	12.046	73.4	2.39935	2.97723e-10
	isoform_311784	0.063	4.82	5.10005	2.98187e-10
	isoform_274206	1.68	10.663	2.46833	2.99718e-10
	isoform_86295	2.286	9.99	1.9582	3.02467e-10
	isoform_329864	10.003	25.383	1.19534	3.06065e-10
	isoform_261360	6.97	16.226	1.06621	3.09419e-10
	isoform_53709	0	2.646	5.97409	3.10879e-10
	isoform_51822	4.263	93.006	3.99628	3.14023e-10
	isoform_193941	0.14	3.79	4.17347	3.14368e-10
	isoform_208226	0.44	2.086	2.09073	3.16214e-10
	isoform_292538	0.926	5.086	2.2548	3.17611e-10
	isoform_204260	7.923	24.883	1.50075	3.21062e-10
	isoform_152150	2.553	36.856	3.5118	3.21571e-10
	isoform_173819	0	3.32	6.21693	3.23251e-10
	isoform_286942	0.953	4.67	2.09234	3.27415e-10
	isoform_215076	0.316	2.823	2.9101	3.27605e-10
	isoform_250888	1.526	6.153	1.84034	3.29802e-10
	isoform_332228	6.163	20.88	1.60543	3.38675e-10
	isoform_282105	0.153	3.65	4.09822	3.40093e-10
	isoform_329406	4.923	16.33	1.55562	3.40093e-10
	isoform_34133	2.286	9.786	1.9237	3.40093e-10
	isoform_222344	0.71	10.173	3.49596	3.45027e-10
	isoform_163340	0.5	3.943	2.76285	3.45042e-10
	isoform_47971	0	3.353	6.05206	3.45207e-10
	isoform_93052	0	11.323	6.22874	3.48699e-10
	isoform_258487	0.023	5.756	5.71018	3.54842e-10
	isoform_101793	1.126	8.536	2.71429	3.56195e-10
	isoform_44588	3.383	10.3	1.44927	3.56195e-10
	isoform_307612	0.57	3.183	2.28688	3.59395e-10
	isoform_159521	1.423	4.023	1.34987	3.60104e-10
	isoform_342105	0.283	1.48	2.18064	3.61681e-10
	isoform_144619	0	2.11	6.00896	3.62488e-10
	isoform_183085	5.633	15.79	1.32254	3.63878e-10
	isoform_92259	14.51	61.34	1.89851	3.64383e-10
	isoform_41932	1.846	14.166	2.7321	3.64504e-10
	isoform_295588	5.21	17.016	1.54803	3.6499e-10
	isoform_188006	2.646	11.77	1.96963	3.75014e-10
	isoform_343268	0.043	2.63	5.12983	3.81357e-10
	isoform_111333	0.47	36.613	5.26952	3.81826e-10
	isoform_269376	0.616	4.85	2.79289	3.82834e-10
	isoform_176976	0.16	3.056	3.77786	3.9264e-10
	isoform_148663	0	5.093	6.03142	3.98194e-10
	isoform_110457	2.446	19.736	2.80005	4.02391e-10
	isoform_65572	0	5.973	6.20179	4.02639e-10
	isoform_245734	0	3.356	5.98002	4.0294e-10
	isoform_910	2.09	5.673	1.28244	4.08782e-10
	isoform_101649	1.073	10.956	3.05564	4.09202e-10
	isoform_282696	0.313	5.636	3.91152	4.12289e-10
	isoform_146702	0.643	6.006	2.93551	4.13895e-10
	isoform_4331	2.903	6.703	1.0593	4.19269e-10
	isoform_242031	3.843	10.996	1.35603	4.22669e-10
	isoform_346236	6.38	16.086	1.17883	4.23547e-10
	isoform_239528	0	2.27	5.94989	4.25607e-10
	isoform_36729	0.36	8.8	4.05137	4.38802e-10
	isoform_6420	3.02	8.656	1.37018	4.45493e-10
	isoform_40028	2.11	7.636	1.69109	4.51476e-10
	isoform_306914	0.69	11.676	3.72416	4.5728e-10
	isoform_156375	0.233	10.79	4.70271	4.57452e-10
	isoform_336282	2.236	7.076	1.49571	4.62909e-10
	isoform_174055	0	5.216	5.97946	4.70037e-10
	isoform_267167	2.476	6.416	1.2192	4.7005e-10
	isoform_64884	22.693	87.336	1.75869	4.7005e-10
	isoform_71075	0.263	6.59	4.14419	4.70615e-10
	isoform_22579	3.55	10.85	1.44735	4.79047e-10
	isoform_92622	3.823	39.95	3.11817	4.79566e-10
	isoform_40617	3.543	18.95	2.23007	4.80078e-10
	isoform_282847	0.186	3.823	3.87719	4.83581e-10
	isoform_226550	0.53	5.89	3.17151	5.01558e-10
	isoform_145904	4.78	14.256	1.42417	5.02394e-10
	isoform_172411	2.066	6.35	1.45482	5.04897e-10
	isoform_141757	0	4.62	6.1233	5.06375e-10
	isoform_150013	0	2.516	6.0843	5.06375e-10
	isoform_290135	1.39	6.946	2.10887	5.09182e-10
	isoform_79076	4.37	51.163	3.24595	5.16276e-10
	isoform_304556	1.803	6.56	1.69308	5.19242e-10
	isoform_90619	2.803	19.746	2.5828	5.21455e-10
	isoform_209866	1.813	5.21	1.36792	5.24898e-10
	isoform_36349	0.533	20.503	4.58188	5.24898e-10
	isoform_96642	0.706	6.263	2.93738	5.36027e-10
	isoform_335271	0.643	2.786	1.92572	5.46789e-10
	isoform_51261	0	3.536	6.02623	5.4703e-10
	isoform_118683	2.746	28.21	3.11073	5.48948e-10
	isoform_4051	1.186	4.26	1.67036	5.50431e-10
	isoform_23121	1.49	19.243	3.37029	5.55841e-10
	isoform_353341	0.133	6.676	4.81072	5.74462e-10
	isoform_104571	6.493	25.336	1.78788	5.74869e-10
	isoform_304907	0.18	13.55	5.16793	5.80067e-10
	isoform_84593	2.016	12.746	2.46127	5.91045e-10
	isoform_47686	0	4.25	6.11147	5.91401e-10
	isoform_44396	2.846	12.953	2.00094	5.94449e-10
	isoform_16892	1.393	12.303	2.87938	5.95558e-10
	isoform_42474	0	2.926	6.0432	5.96876e-10
	isoform_74694	2.786	11.6	1.88381	6.08738e-10
	isoform_20716	19.436	57.35	1.39627	6.13419e-10
	isoform_12143	0	1.763	6.01727	6.38204e-10
	isoform_18617	4.003	17.41	1.95476	6.45067e-10
	isoform_58239	4.866	15.363	1.50198	6.54781e-10
	isoform_30812	1.376	5.36	1.79425	6.80021e-10
	isoform_116595	111.456	397.063	1.65673	6.909e-10
	isoform_274805	0.546	2.153	1.79545	6.91481e-10
	isoform_240084	1.073	5.506	2.15415	6.93835e-10
	isoform_181990	13.616	101.656	2.67487	6.95804e-10
	isoform_63415	1.68	6.196	1.73362	7.02935e-10
	isoform_185570	2.38	50.183	3.9423	7.19955e-10
	isoform_310411	0.76	11.063	3.60276	7.46211e-10
	isoform_75403	0.296	6.35	4.00456	7.568e-10
	isoform_27293	1.84	16.546	2.92193	7.67409e-10
	isoform_317597	0.283	2.216	2.73322	7.67528e-10
	isoform_4233	2.943	6.636	1.02453	7.83653e-10
	isoform_333692	4.58	24.136	2.21961	7.86075e-10
	isoform_51976	0	2.543	5.9134	7.87474e-10
	isoform_56553	0.553	14.713	4.18	8.01666e-10
	isoform_91086	0	5.643	5.96775	8.09973e-10
	isoform_75562	13.49	51.676	1.77232	8.17652e-10
	isoform_30824	0	2.036	5.94519	8.21504e-10
	isoform_75851	34.27	91.8	1.27031	8.28649e-10
	isoform_94928	31.35	169.926	2.22522	8.33066e-10
	isoform_88642	1.373	8.22	2.41939	8.37387e-10
	isoform_69884	0.116	5.69	4.82253	8.40523e-10
	isoform_293034	0.87	5.063	2.35726	8.48711e-10
	isoform_297508	0.356	5.776	3.64442	8.54801e-10
	isoform_314062	0.896	2.686	1.41937	8.56542e-10
	isoform_274087	0.013	2.046	5.37355	8.68621e-10
	isoform_33117	2.05	8.42	1.87236	8.82262e-10
	isoform_337156	0.053	2.623	4.71802	9.03962e-10
	isoform_45152	3.31	11.023	1.5691	9.21809e-10
	isoform_239755	0.026	4.91	5.53207	9.25535e-10
	isoform_333042	0	2.67	5.99149	9.28443e-10
	isoform_62033	4.113	19.97	2.10727	9.42881e-10
	isoform_154580	0	1.063	5.92687	9.43997e-10
	isoform_97053	5.396	31.28	2.33468	9.49621e-10
	isoform_173573	0.88	4.44	2.1652	9.5156e-10
	isoform_171608	0.646	3.146	2.08632	9.57876e-10
	isoform_140027	8.016	24.98	1.47373	9.73988e-10
	isoform_181829	20.85	48.653	1.0694	9.75286e-10
	isoform_246583	0.926	9.12	3.04017	9.9025e-10
	isoform_224599	4.89	38.066	2.72313	9.95989e-10
	isoform_133843	0.016	2.5	5.47537	9.97883e-10
	isoform_241235	2.74	8.476	1.47195	1.00437e-09
	isoform_347302	2.376	13.116	2.2808	1.0203e-09
	isoform_133995	0.05	4.3	5.35066	1.03194e-09
	isoform_57486	1.063	5.7	2.23752	1.04442e-09
	isoform_12795	3.463	8.646	1.16958	1.06172e-09
	isoform_319899	0.02	2.986	5.37268	1.06398e-09
	isoform_74480	3.706	34.253	2.964	1.06855e-09
	isoform_111326	9.843	28.3	1.35693	1.09628e-09
	isoform_292778	0	4.43	5.85995	1.17259e-09
	isoform_33074	0	2.216	5.92766	1.19223e-09
	isoform_194070	1.45	26.633	3.77018	1.20751e-09
	isoform_172382	0.136	7.533	5.01752	1.24694e-09
	isoform_69904	0	4.88	6.03019	1.27288e-09
	isoform_139159	0	2.123	5.92102	1.28351e-09
	isoform_29773	7.676	17.44	1.03226	1.38262e-09
	isoform_97465	85.57	200.306	1.06753	1.39597e-09
	isoform_326590	0.573	9.62	3.68498	1.40311e-09
	isoform_92417	19.6	100.813	2.14597	1.43386e-09
	isoform_74320	6.48	16.27	1.17597	1.43501e-09
	isoform_47959	4.953	127.796	4.15453	1.44744e-09
	isoform_31541	0.036	2.27	4.88867	1.45451e-09
	isoform_106823	0.64	8.536	3.37549	1.45461e-09
	isoform_243396	0	2.783	5.87551	1.45483e-09
	isoform_225653	0.236	6.366	4.29697	1.47009e-09
	isoform_22003	4.256	16.876	1.80459	1.48018e-09
	isoform_326529	0.046	6.78	5.32019	1.48815e-09
	isoform_259288	0.323	8.386	4.12364	1.49466e-09
	isoform_81784	6	40.403	2.5225	1.50412e-09
	isoform_12708	0	1.696	5.94516	1.50436e-09
	isoform_229290	0.12	1.836	3.70787	1.50876e-09
	isoform_261102	0	2.556	5.84849	1.51354e-09
	isoform_232625	3.51	15.976	1.99009	1.54613e-09
	isoform_90996	6.783	44.57	2.4725	1.56429e-09
	isoform_109392	0	16.983	6.01181	1.56719e-09
	isoform_106970	0.503	20.976	4.70088	1.57316e-09
	isoform_55386	0.96	5.68	2.35308	1.57316e-09
	isoform_272844	1.17	3.99	1.61407	1.59897e-09
	isoform_84027	0.103	4.523	4.61	1.63633e-09
	isoform_158312	0.343	6.223	3.72399	1.63999e-09
	isoform_201546	2.163	8.126	1.75129	1.67116e-09
	isoform_173057	0.34	2.796	2.8662	1.68763e-09
	isoform_170714	0.026	6.12	5.84236	1.68776e-09
	isoform_116343	0.27	12.436	4.64954	1.69884e-09
	isoform_316587	0.03	2.14	4.92789	1.70698e-09
	isoform_144064	0.366	2.896	2.77267	1.71748e-09
	isoform_257116	1.063	4.12	1.78922	1.71856e-09
	isoform_88185	0	6.623	5.99482	1.73315e-09
	isoform_265709	2.48	7.913	1.52055	1.73521e-09
	isoform_67729	2.303	10.95	2.07168	1.73837e-09
	isoform_35553	0.58	4.886	2.82747	1.74818e-09
	isoform_134979	0	1.383	5.80071	1.751e-09
	isoform_5403	0.006	1.66	5.60729	1.76836e-09
	isoform_70738	19.056	43.35	1.03701	1.80157e-09
	isoform_270647	0.396	2.4	2.41232	1.81547e-09
	isoform_84717	1.363	7.436	2.27603	1.82982e-09
	isoform_47779	0	2.976	5.93038	1.8472e-09
	isoform_26510	4.873	19.533	1.81965	1.87336e-09
	isoform_22543	1.676	5.933	1.66332	1.8809e-09
	isoform_229688	3.626	10.116	1.32553	1.90633e-09
	isoform_50898	0.006	3.886	6.00242	1.93516e-09
	isoform_83077	0	4.63	5.91032	1.96093e-09
	isoform_197714	0.26	1.746	2.56351	1.96194e-09
	isoform_21761	0.09	2.013	4.03453	1.96194e-09
	isoform_280227	6.173	15.11	1.13171	1.97592e-09
	isoform_7200	4.4	11.31	1.20203	2.00383e-09
	isoform_210041	1.94	6.246	1.5194	2.025e-09
	isoform_14284	7.693	18.566	1.11734	2.04146e-09
	isoform_319919	7.056	19.503	1.30997	2.05823e-09
	isoform_330465	1.143	5.72	2.13823	2.06717e-09
	isoform_312632	0.09	5.013	5.05703	2.06989e-09
	isoform_171952	2.116	39.84	3.80468	2.07124e-09
	isoform_37992	2.786	38.68	3.45137	2.07366e-09
	isoform_345887	10.56	24.013	1.03232	2.11838e-09
	isoform_187534	0	5.143	5.89298	2.12944e-09
	isoform_96194	92.34	669.21	2.59188	2.13235e-09
	isoform_63952	0.103	3.61	4.46999	2.14328e-09
	isoform_294455	0	1.606	5.87243	2.16866e-09
	isoform_20924	0.21	4.27	3.95834	2.1741e-09
	isoform_192658	0.033	3.963	5.29453	2.19616e-09
	isoform_138754	0.156	3.736	4.24629	2.22059e-09
	isoform_244322	0.523	8.186	3.55515	2.25811e-09
	isoform_243321	0.163	8.12	4.81109	2.26081e-09
	isoform_32530	1.553	18.93	3.29768	2.26848e-09
	isoform_11985	2.293	9.933	1.94675	2.2698e-09
	isoform_72693	1.846	14.703	2.76558	2.2698e-09
	isoform_226310	2.35	11.463	2.09021	2.27145e-09
	isoform_38762	3.466	14.523	1.89856	2.28345e-09
	isoform_299465	0.13	7.766	4.95562	2.30846e-09
	isoform_31466	2.726	27.803	3.06628	2.34236e-09
	isoform_220552	0.736	4.84	2.47848	2.39537e-09
	isoform_286308	0.62	2.203	1.66409	2.40211e-09
	isoform_39070	0.043	2.363	4.82632	2.41358e-09
	isoform_349384	4.933	12.926	1.22603	2.45283e-09
	isoform_24373	3.116	10.846	1.63603	2.45684e-09
	isoform_306184	8.27	19.366	1.06858	2.50655e-09
	isoform_110855	3.1	19.066	2.40123	2.51439e-09
	isoform_77298	1.526	10.803	2.60983	2.5575e-09
	isoform_343523	0.166	2.673	3.77302	2.57869e-09
	isoform_94233	0	4.916	5.83212	2.60269e-09
	isoform_193486	0.13	3.633	4.28416	2.61529e-09
	isoform_100958	1.97	22.893	3.2377	2.62113e-09
	isoform_79642	0.726	13.853	3.84979	2.63623e-09
	isoform_94615	14.08	108.823	2.71789	2.65174e-09
	isoform_37087	0	4.466	6.0534	2.65858e-09
	isoform_25955	5.523	16.396	1.40853	2.72299e-09
	isoform_10194	0.69	7.846	3.21001	2.7339e-09
	isoform_262412	0	2.68	5.80114	2.74796e-09
	isoform_72255	0.153	9.613	4.94969	2.83443e-09
	isoform_271983	0.596	3.87	2.46111	2.86449e-09
	isoform_111274	19.413	348.006	3.73463	2.88673e-09
	isoform_112002	2.113	11.783	2.26347	2.91963e-09
	isoform_250053	1.623	11.67	2.60014	2.92544e-09
	isoform_33787	4.266	9.606	1.01772	2.92725e-09
	isoform_80791	1.7	8.42	2.14285	2.94729e-09
	isoform_66543	7.13	35.376	2.13542	2.95546e-09
	isoform_103704	0	6.28	5.82721	2.97147e-09
	isoform_211725	0.22	4.133	3.75692	3.00401e-09
	isoform_239831	0.183	5.953	4.4107	3.04663e-09
	isoform_87317	4.786	60.926	3.29663	3.07008e-09
	isoform_143383	1.676	27.933	3.66607	3.08634e-09
	isoform_2531	0.69	3.81	2.26959	3.08942e-09
	isoform_305733	0.806	4.933	2.37747	3.11607e-09
	isoform_206171	2.253	12.353	2.24236	3.14127e-09
	isoform_83016	1.05	6.71	2.44458	3.16347e-09
	isoform_141566	0.39	4.84	3.28337	3.206e-09
	isoform_41386	15.026	44.91	1.40665	3.25624e-09
	isoform_152787	0.083	4.896	4.87798	3.26428e-09
	isoform_238786	8.906	111.71	3.32036	3.27268e-09
	isoform_74636	0.56	4.643	2.85765	3.28936e-09
	isoform_336362	0.896	6.31	2.56549	3.32786e-09
	isoform_224262	0.05	2.64	4.79329	3.4257e-09
	isoform_107726	0.11	6.066	4.92508	3.45371e-09
	isoform_247232	0.206	3.003	3.51844	3.47415e-09
	isoform_319565	5.713	34.87	2.3762	3.50858e-09
	isoform_341241	0.07	1.373	3.81736	3.51619e-09
	isoform_229349	1.003	7.323	2.65406	3.57044e-09
	isoform_57947	1.053	5.753	2.29554	3.69342e-09
	isoform_54030	2.136	22.763	3.11719	3.73278e-09
	isoform_61867	0.896	6.39	2.59821	3.77172e-09
	isoform_338856	0.06	2.753	4.78304	3.8035e-09
	isoform_24481	0.38	3.08	2.77938	3.82306e-09
	isoform_23314	1.836	8.266	1.9953	3.85506e-09
	isoform_25959	2.966	19.09	2.4413	3.85624e-09
	isoform_30358	0	1.923	5.80902	3.85945e-09
	isoform_48788	0	2.643	5.80468	3.87728e-09
	isoform_259429	0.67	2.653	1.82351	3.90424e-09
	isoform_177977	0.576	6.006	3.08749	3.94487e-09
	isoform_230351	0.83	4.393	2.24008	3.96809e-09
	isoform_202598	0.35	2.21	2.489	4.10968e-09
	isoform_95210	5.246	127.613	4.05869	4.15371e-09
	isoform_183555	2.273	17.386	2.66996	4.17531e-09
	isoform_79826	5.246	21.396	1.83486	4.18974e-09
	isoform_182464	0.666	15.386	4.04971	4.19173e-09
	isoform_48908	10.91	27.283	1.17008	4.27599e-09
	isoform_158533	0.76	3.33	1.9619	4.29912e-09
	isoform_64844	0	2.903	5.77946	4.2994e-09
	isoform_346066	1.04	5.77	2.27686	4.30874e-09
	isoform_303891	0.52	3.46	2.50229	4.34768e-09
	isoform_10217	1.493	6.963	2.03314	4.35286e-09
	isoform_80398	1.57	13.406	2.85696	4.39492e-09
	isoform_227555	1.996	10.26	2.15403	4.40441e-09
	isoform_208952	2.476	12.503	2.13876	4.40982e-09
	isoform_108169	0	5.633	5.74235	4.42562e-09
	isoform_279013	0.27	6.45	4.03929	4.42585e-09
	isoform_26882	2.27	9.336	1.87187	4.43311e-09
	isoform_288964	0.97	8.946	2.94009	4.44364e-09
	isoform_34291	0.473	4.226	2.89624	4.46779e-09
	isoform_60903	8.336	20.653	1.16177	4.51447e-09
	isoform_71965	0.316	4.393	3.41505	4.53694e-09
	isoform_5676	3.863	10.53	1.29703	4.57442e-09
	isoform_93589	4.6	46.553	3.05655	4.5958e-09
	isoform_24994	0.333	2.903	2.92151	4.64836e-09
	isoform_137414	0	4.33	5.75982	4.7198e-09
	isoform_241150	0.85	5.066	2.37151	4.79016e-09
	isoform_274164	1.35	4.456	1.56271	4.81034e-09
	isoform_1806	1.976	7.67	1.77138	4.81597e-09
	isoform_259142	0.446	3.88	2.92217	4.90233e-09
	isoform_79700	0	4.333	5.84416	4.90616e-09
	isoform_197825	1	12.44	3.29899	4.91056e-09
	isoform_336224	1.57	8.373	2.20526	4.94571e-09
	isoform_283962	1.766	13.95	2.74032	4.94999e-09
	isoform_250483	0.203	12.226	4.95172	5.04906e-09
	isoform_257253	1.006	11.376	3.20015	5.0519e-09
	isoform_290737	0.26	1.856	2.60717	5.10208e-09
	isoform_207841	0.733	6.296	2.85594	5.21475e-09
	isoform_35464	3.483	16.026	2.0145	5.21475e-09
	isoform_20655	2.636	38.36	3.48512	5.3938e-09
	isoform_352637	0	7.3	5.71638	5.43794e-09
	isoform_49546	0	3.843	5.91288	5.43794e-09
	isoform_157450	0.343	3.236	3.00793	5.44765e-09
	isoform_245134	1.29	4.08	1.51975	5.47652e-09
	isoform_318810	1.676	16.42	2.99139	5.49125e-09
	isoform_74856	41.04	97.516	1.08917	5.59798e-09
	isoform_39086	9.63	23.003	1.1006	5.77323e-09
	isoform_310847	0.823	2.29	1.33757	5.79066e-09
	isoform_318338	2.146	8.883	1.87188	5.91256e-09
	isoform_285532	4.793	11.443	1.09719	5.92124e-09
	isoform_34059	0.166	5.82	4.42886	6.04287e-09
	isoform_68465	0.563	4.173	2.63582	6.04287e-09
	isoform_91303	1.65	23.96	3.48822	6.08265e-09
	isoform_38995	11.006	50.15	2.00083	6.12913e-09
	isoform_70342	23.17	59.196	1.20301	6.15201e-09
	isoform_36595	2.32	25.69	3.14511	6.17985e-09
	isoform_165837	0.503	2.756	2.25663	6.28238e-09
	isoform_104730	80.46	305.35	1.74252	6.28815e-09
	isoform_278257	0.413	6.993	3.67032	6.31276e-09
	isoform_71761	118.42	393.653	1.56643	6.34271e-09
	isoform_87025	1.49	24.62	3.64079	6.34837e-09
	isoform_98996	0.276	15.346	4.83925	6.38171e-09
	isoform_187343	1.433	7.063	2.1283	6.4133e-09
	isoform_112968	0	6.103	5.68195	6.46092e-09
	isoform_40870	55.593	158.2	1.33946	6.50001e-09
	isoform_176622	0	1	5.73372	6.69771e-09
	isoform_280846	3.94	14.846	1.73157	6.75952e-09
	isoform_5855	3.96	12.57	1.50079	6.8672e-09
	isoform_187818	0.736	3.883	2.18523	6.88286e-09
	isoform_119883	2.136	45.063	3.89161	6.89986e-09
	isoform_32740	0.096	4.313	4.72296	6.95145e-09
	isoform_90270	24.36	130.663	2.23276	6.98101e-09
	isoform_234898	0	3.94	5.67419	7.14368e-09
	isoform_209552	2.603	7.483	1.35742	7.16357e-09
	isoform_15534	14.323	49.883	1.62321	7.28481e-09
	isoform_268359	0.73	5.106	2.57081	7.31649e-09
	isoform_314239	0.32	2.343	2.66278	7.34879e-09
	isoform_27876	0.346	4.026	3.20007	7.37423e-09
	isoform_29191	3.286	17.123	2.15686	7.43416e-09
	isoform_281252	0	4.143	5.6825	7.50551e-09
	isoform_66004	0.913	9.836	3.17081	7.53497e-09
	isoform_110524	9.286	111.38	3.26021	7.55916e-09
	isoform_44673	0	5.176	5.9446	7.64253e-09
	isoform_141054	0.25	2.27	2.87921	7.67909e-09
	isoform_106080	176.026	642.066	1.69642	7.70609e-09
	isoform_245117	1.863	4.32	1.0568	7.85419e-09
	isoform_44720	3.303	10.08	1.44949	7.87263e-09
	isoform_84710	8.093	19.543	1.11684	7.95028e-09
	isoform_89323	20.77	140.51	2.52221	7.97602e-09
	isoform_321858	0.09	3.033	4.31761	8.043e-09
	isoform_331680	0.733	3.753	2.1594	8.10996e-09
	isoform_42387	11.326	26.083	1.04954	8.1178e-09
	isoform_197710	2.146	8.016	1.72268	8.20517e-09
	isoform_134735	0	2.456	5.75832	8.27963e-09
	isoform_70274	0.616	6.313	3.04945	8.31715e-09
	isoform_158106	0.853	6.66	2.74135	8.49253e-09
	isoform_179743	2.006	7.49	1.71226	8.50024e-09
	isoform_294678	11.303	36.203	1.50432	8.58016e-09
	isoform_92009	8.566	82.55	2.9886	8.58016e-09
	isoform_288727	0.43	5.356	3.28795	8.61145e-09
	isoform_68456	3.676	18.89	2.17372	8.63035e-09
	isoform_132529	94.076	280.906	1.41015	8.66823e-09
	isoform_249590	0	4.92	5.73392	8.88764e-09
	isoform_176084	0.986	7.57	2.71162	8.95054e-09
	isoform_32353	1.64	5.623	1.62277	9.07126e-09
	isoform_5300	1.583	9.933	2.44228	9.10981e-09
	isoform_289391	3.933	9.676	1.15369	9.14986e-09
	isoform_343563	1.51	16.513	3.15078	9.16097e-09
	isoform_24981	0.76	5.67	2.64358	9.19176e-09
	isoform_28088	23.15	76.73	1.55847	9.19784e-09
	isoform_203071	0.276	2.796	3.078	9.20003e-09
	isoform_335373	0.556	10.05	3.78041	9.21025e-09
	isoform_240838	0.193	2.05	3.16497	9.23106e-09
	isoform_228468	0.746	4.72	2.43283	9.24971e-09
	isoform_15262	0.4	4.62	3.21894	9.2996e-09
	isoform_33211	0	1.736	5.68955	9.38026e-09
	isoform_78256	6.933	17.556	1.18997	9.51142e-09
	isoform_135481	2.176	6.013	1.30363	9.52281e-09
	isoform_189612	0.186	1.583	2.79495	9.61449e-09
	isoform_249529	0.506	7.716	3.56003	9.71793e-09
	isoform_271811	0.87	4.866	2.27352	9.93112e-09
	isoform_103199	18.94	53.173	1.32579	9.9787e-09
	isoform_199206	1.296	5.946	2.01188	9.99708e-09
	isoform_99819	0.97	18.173	3.78768	1.01e-08
	isoform_90898	16.276	77.253	2.02937	1.01993e-08
	isoform_119117	35.816	125.24	1.61448	1.0303e-08
	isoform_191205	0.613	2.483	1.83579	1.04169e-08
	isoform_55131	22.706	72.713	1.50822	1.04745e-08
	isoform_51774	0.093	2.22	3.94145	1.05244e-08
	isoform_66343	10.663	34.886	1.55409	1.08237e-08
	isoform_862	3.436	10.196	1.39883	1.08343e-08
	isoform_14701	0.51	2.93	2.32412	1.08428e-08
	isoform_6060	1.13	4.616	1.83716	1.10233e-08
	isoform_38221	5.656	13.35	1.08985	1.1187e-08
	isoform_123526	15.576	91.656	2.33476	1.11977e-08
	isoform_25684	1.643	8.14	2.12536	1.12785e-08
	isoform_94546	0	3.77	5.62769	1.13052e-08
	isoform_351124	0.616	3.086	2.14666	1.1449e-08
	isoform_23499	26.756	75.983	1.33554	1.15604e-08
	isoform_250114	0.066	9.013	5.17456	1.17549e-08
	isoform_8205	0.613	3.89	2.44728	1.17592e-08
	isoform_21994	0.236	2.203	2.89422	1.17665e-08
	isoform_3305	5.763	18.34	1.51646	1.18123e-08
	isoform_198991	0.063	3.63	4.80691	1.18485e-08
	isoform_323395	0.02	2.776	5.16758	1.20504e-08
	isoform_226649	0.023	2.066	5.10249	1.2062e-08
	isoform_318892	0.063	3.89	4.86158	1.21968e-08
	isoform_111625	1.92	16.503	2.85424	1.22503e-08
	isoform_234803	0.94	2.696	1.37542	1.2271e-08
	isoform_44495	0.36	3.233	2.928	1.22771e-08
	isoform_238350	0.023	2.943	5.13807	1.23563e-08
	isoform_223928	1.753	27.676	3.58712	1.25938e-08
	isoform_174021	3.223	9.71	1.42407	1.26015e-08
	isoform_105150	0.906	12.503	3.3911	1.26145e-08
	isoform_68274	0.89	4.923	2.28327	1.26711e-08
	isoform_297477	0.713	5.06	2.57825	1.26734e-08
	isoform_59260	0.033	2.1	5.10429	1.27502e-08
	isoform_240031	0.593	4.13	2.65703	1.28197e-08
	isoform_266075	0	0.726	5.68789	1.28197e-08
	isoform_310694	1.113	14.163	3.28939	1.29845e-08
	isoform_212648	4.246	15.85	1.72849	1.30708e-08
	isoform_321390	0.026	1.423	4.87253	1.32124e-08
	isoform_159503	1.793	9.173	2.17119	1.32864e-08
	isoform_72887	23.733	66.216	1.32957	1.36998e-08
	isoform_137567	0.136	1.983	3.4897	1.39662e-08
	isoform_168099	0.073	2.46	4.71556	1.41846e-08
	isoform_235625	0.73	12.763	3.70436	1.41929e-08
	isoform_97312	0.466	8.226	3.82841	1.4492e-08
	isoform_200781	0.223	9.546	4.63025	1.51784e-08
	isoform_144048	2.066	7.473	1.67491	1.52348e-08
	isoform_159505	2.05	12.986	2.41114	1.52804e-08
	isoform_142897	1.296	3.88	1.42795	1.52985e-08
	isoform_1819	2.36	6.25	1.26028	1.53173e-08
	isoform_53867	0	2.46	5.66428	1.54418e-08
	isoform_188766	1.176	4.226	1.67496	1.54514e-08
	isoform_353721	0.353	13.006	4.4668	1.54562e-08
	isoform_51455	2.053	7.353	1.67257	1.56559e-08
	isoform_71109	0.306	3.13	3.07773	1.56607e-08
	isoform_155295	2.78	13.523	2.10587	1.57373e-08
	isoform_212083	0.48	1.406	1.39848	1.5759e-08
	isoform_105495	2.206	37.823	3.66073	1.58981e-08
	isoform_196165	0.82	3.656	1.98455	1.59346e-08
	isoform_285067	0.426	2.6	2.37906	1.60212e-08
	isoform_20786	9.45	24.736	1.22915	1.60405e-08
	isoform_192906	2.683	10.486	1.77777	1.61983e-08
	isoform_232790	1.173	4.433	1.75015	1.62226e-08
	isoform_187735	0.853	4.26	2.1166	1.62332e-08
	isoform_69140	7.04	108.24	3.54698	1.63378e-08
	isoform_226185	12.19	48.98	1.82119	1.63931e-08
	isoform_117823	0.173	7.936	4.53351	1.64912e-08
	isoform_301178	0.006	1.576	5.78682	1.6537e-08
	isoform_262608	2.773	14.286	2.18208	1.66996e-08
	isoform_23401	0.706	3.133	1.97178	1.67272e-08
	isoform_299789	9.06	20.663	1.03613	1.67931e-08
	isoform_34911	3.106	13.113	1.88888	1.71185e-08
	isoform_281287	0.043	1.703	4.38459	1.71593e-08
	isoform_187811	0.45	6.463	3.47208	1.7301e-08
	isoform_188163	0.143	2.97	3.86392	1.74575e-08
	isoform_189460	0.086	2.533	4.26209	1.76552e-08
	isoform_158193	2.86	7.133	1.16609	1.76783e-08
	isoform_337282	8.75	30.326	1.63348	1.79675e-08
	isoform_38582	1.136	4.253	1.73106	1.79771e-08
	isoform_160144	0.183	4.23	3.98758	1.80362e-08
	isoform_222243	4.1	11.853	1.36512	1.81091e-08
	isoform_41014	9.926	22.573	1.03948	1.82648e-08
	isoform_268342	0.99	3.963	1.81617	1.82763e-08
	isoform_311926	8.43	20.226	1.11044	1.82966e-08
	isoform_188504	0.06	2.786	4.67309	1.85445e-08
	isoform_276300	0.05	2.3	4.80532	1.86567e-08
	isoform_204164	2.333	7.906	1.60514	1.91367e-08
	isoform_320732	2.926	10.463	1.66333	1.93644e-08
	isoform_289809	1.793	8.446	2.04104	1.95186e-08
	isoform_86944	0.846	11.713	3.38521	1.96309e-08
	isoform_6976	1.296	7.773	2.35487	2.00959e-08
	isoform_189692	0.116	3.636	4.23261	2.01715e-08
	isoform_276776	0.58	5.333	2.94271	2.01844e-08
	isoform_73193	7.7	33.813	1.9616	2.09057e-08
	isoform_179703	0.15	4.37	4.21948	2.10738e-08
	isoform_16411	1.303	4.54	1.6336	2.10995e-08
	isoform_246576	0.016	1.796	5.08249	2.11218e-08
	isoform_86365	0.053	4.013	4.89971	2.1265e-08
	isoform_62092	0.92	5.846	2.48942	2.15696e-08
	isoform_4708	1.173	7.656	2.45425	2.1572e-08
	isoform_31641	1.076	4.38	1.87356	2.16511e-08
	isoform_114718	1.906	11.086	2.31862	2.17292e-08
	isoform_174133	0	2.256	5.5629	2.17675e-08
	isoform_68921	0	2.48	5.57196	2.17842e-08
	isoform_191131	0	2.35	5.57863	2.18771e-08
	isoform_337210	0	2.326	5.6164	2.18867e-08
	isoform_12154	8.643	50.256	2.32734	2.19427e-08
	isoform_95664	7.82	73.85	2.95204	2.21105e-08
	isoform_258597	0.8	4.363	2.25552	2.2171e-08
	isoform_16701	10.003	37.4	1.74346	2.23319e-08
	isoform_309116	4.453	14.143	1.50387	2.24071e-08
	isoform_232762	1.046	5.793	2.2581	2.25155e-08
	isoform_4144	2.246	5.23	1.06799	2.25441e-08
	isoform_220098	0.603	2.003	1.56812	2.2572e-08
	isoform_208965	0.073	1.353	3.70392	2.27822e-08
	isoform_73202	0.1	2.846	4.24583	2.28575e-08
	isoform_233883	23.006	88.083	1.74219	2.3142e-08
	isoform_127710	6.06	33.103	2.22242	2.32406e-08
	isoform_271211	1.906	4.716	1.15288	2.32672e-08
	isoform_144468	1.803	9.65	2.2104	2.34012e-08
	isoform_246854	0.27	11.4	4.52683	2.34966e-08
	isoform_110253	0.21	5.73	4.24209	2.37609e-08
	isoform_134064	2.136	5.626	1.24565	2.38171e-08
	isoform_200869	1.336	7.8	2.31099	2.38171e-08
	isoform_106218	0.526	21.65	4.60888	2.38879e-08
	isoform_88805	19.846	49.61	1.16775	2.40648e-08
	isoform_95105	1.186	11.38	2.98496	2.40988e-08
	isoform_137099	1.193	5.26	1.96262	2.41411e-08
	isoform_78885	7.87	23.65	1.42462	2.41901e-08
	isoform_95220	0	4.576	5.57322	2.42972e-08
	isoform_179239	0.68	11.026	3.58	2.44003e-08
	isoform_104058	0.4	15.79	4.4698	2.45606e-08
	isoform_25985	7.283	35.916	2.121	2.4838e-08
	isoform_169019	0.323	3.06	2.98672	2.49025e-08
	isoform_294449	2.013	6.5	1.52827	2.49708e-08
	isoform_32546	0.11	2.42	3.95195	2.50536e-08
	isoform_70592	0	3.063	5.62645	2.50859e-08
	isoform_202292	14.046	120.49	2.82707	2.51368e-08
	isoform_91264	1.563	9.013	2.3393	2.51393e-08
	isoform_30056	0.966	4.31	1.97902	2.52419e-08
	isoform_173436	0.62	6.773	3.16255	2.54618e-08
	isoform_62823	8.21	20.096	1.14452	2.57936e-08
	isoform_314295	0.37	12.613	4.41083	2.58341e-08
	isoform_339329	2.943	8.3	1.33009	2.58865e-08
[truncated: 6,396 more rows]

## Sheet: Supplementary Table S5
Supplementary Table S5 GO annotation of 8394 DEGs
Gene ID	GO Term	Level 2	Level 1
isoform_100049
isoform_100051	[P]GO:0009738//abscisic acid-activated signaling pathway;GO:0097305//response to alcohol;GO:0050794//regulation of cellular process;GO:0009725//response to hormone;GO:0006950//response to stress;GO:0097306//cellular response to alcohol;GO:0071310//cellular response to organic substance;GO:0071495//cellular response to endogenous stimulus;GO:0023052//signaling;GO:0009755//hormone-mediated signalin…	[P]signaling;cellular process;response to stimulus;biological regulation;[F]binding;molecular transducer activity;molecular function regulator;	biological_process;molecular_function
isoform_100068	[P]GO:0031323//regulation of cellular metabolic process;GO:0009890//negative regulation of biosynthetic process;GO:1905156//negative regulation of photosynthesis;GO:0050794//regulation of cellular process;GO:0065007//biological regulation;GO:0080090//regulation of primary metabolic process;GO:0010110//regulation of photosynthesis, dark reaction;GO:0019222//regulation of metabolic process;GO:00459…	[C]cellular anatomical entity;intracellular;[P]biological regulation;	cellular_component;biological_process
isoform_100082
isoform_100101	[P]GO:0006725//cellular aromatic compound metabolic process;GO:0006807//nitrogen compound metabolic process;GO:0043170//macromolecule metabolic process;GO:0034641//cellular nitrogen compound metabolic process;GO:1901360//organic cyclic compound metabolic process;GO:0034654//nucleobase-containing compound biosynthetic process;GO:0044238//primary metabolic process;GO:0044271//cellular nitrogen comp…	[C]intracellular;cellular anatomical entity;protein-containing complex;[P]metabolic process;cellular process;[F]binding;	cellular_component;molecular_function;biological_process
isoform_100105	[P]GO:2001141//regulation of RNA biosynthetic process;GO:0045934//negative regulation of nucleobase-containing compound metabolic process;GO:0051103//DNA ligation involved in DNA repair;GO:0010556//regulation of macromolecule biosynthetic process;GO:0050896//response to stimulus;GO:0006355//regulation of transcription, DNA-templated;GO:0031323//regulation of cellular metabolic process;GO:0010558/…	[P]metabolic process;cellular process;biological regulation;response to stimulus;[F]binding;catalytic activity;	biological_process;molecular_function
isoform_100126
isoform_10013	[C]GO:0009532//plastid stroma;GO:0043229//intracellular organelle;GO:0009536//plastid;GO:0005622//intracellular;GO:0043226//organelle;GO:0009507//chloroplast;GO:0110165//cellular anatomical entity;GO:0009570//chloroplast stroma;GO:0005737//cytoplasm;GO:0043227//membrane-bounded organelle;GO:0043231//intracellular membrane-bounded organelle;[F]GO:0097159//organic cyclic compound binding;GO:0003676…	[C]intracellular;cellular anatomical entity;[F]binding;	cellular_component;molecular_function
isoform_100145	[C]GO:0031224//intrinsic component of membrane;GO:0110165//cellular anatomical entity;GO:0016020//membrane;GO:0016021//integral component of membrane;	[C]cellular anatomical entity;	cellular_component
isoform_100210
isoform_100271
isoform_100336
isoform_100353	[C]GO:0016020//membrane;GO:0110165//cellular anatomical entity;GO:0031224//intrinsic component of membrane;GO:0016021//integral component of membrane;[F]GO:0005488//binding;GO:0003824//catalytic activity;GO:0046906//tetrapyrrole binding;GO:0043167//ion binding;GO:0046872//metal ion binding;GO:0020037//heme binding;GO:0043169//cation binding;GO:0016491//oxidoreductase activity;GO:1901363//heterocy…	[C]cellular anatomical entity;[F]catalytic activity;binding;	cellular_component;molecular_function
isoform_100388	[P]GO:0050896//response to stimulus;GO:0042221//response to chemical;GO:1901700//response to oxygen-containing compound;GO:0009269//response to desiccation;GO:0010035//response to inorganic substance;GO:0006950//response to stress;GO:0009415//response to water;GO:0009628//response to abiotic stimulus;GO:0009414//response to water deprivation;GO:0001101//response to acid chemical;[C]GO:0005622//in…	[C]cellular anatomical entity;intracellular;[P]response to stimulus;	biological_process;cellular_component
isoform_100401	[C]GO:0016021//integral component of membrane;GO:0031224//intrinsic component of membrane;GO:0016020//membrane;GO:0110165//cellular anatomical entity;	[C]cellular anatomical entity;	cellular_component
isoform_100409
isoform_100421	[P]GO:0006950//response to stress;GO:0051259//protein complex oligomerization;GO:0050896//response to stimulus;GO:0042542//response to hydrogen peroxide;GO:0065003//protein-containing complex assembly;GO:0006457//protein folding;GO:0000302//response to reactive oxygen species;GO:0042221//response to chemical;GO:0009651//response to salt stress;GO:0006979//response to oxidative stress;GO:0010286//…	[C]intracellular;cellular anatomical entity;[P]cellular process;response to stimulus;[F]binding;	molecular_function;cellular_component;biological_process
isoform_100449	[P]GO:0071702//organic substance transport;GO:0033036//macromolecule localization;GO:0006869//lipid transport;GO:0051179//localization;GO:0006810//transport;GO:0051234//establishment of localization;GO:0010876//lipid localization;[C]GO:0016020//membrane;GO:0110165//cellular anatomical entity;[F]GO:0005488//binding;GO:0008289//lipid binding;	[C]cellular anatomical entity;[P]localization;[F]binding;	molecular_function;biological_process;cellular_component
isoform_100455
isoform_100466	[C]GO:0005737//cytoplasm;GO:0043231//intracellular membrane-bounded organelle;GO:0043227//membrane-bounded organelle;GO:0009536//plastid;GO:0110165//cellular anatomical entity;GO:0009507//chloroplast;GO:0005622//intracellular;GO:0043226//organelle;GO:0043229//intracellular organelle;	[C]cellular anatomical entity;intracellular;	cellular_component
isoform_100500
isoform_100597	[P]GO:0019222//regulation of metabolic process;GO:0050794//regulation of cellular process;GO:0010556//regulation of macromolecule biosynthetic process;GO:0051252//regulation of RNA metabolic process;GO:0031326//regulation of cellular biosynthetic process;GO:0031323//regulation of cellular metabolic process;GO:0080090//regulation of primary metabolic process;GO:0006355//regulation of transcription…	[P]biological regulation;[F]binding;	molecular_function;biological_process
isoform_100621	[P]GO:0071704//organic substance metabolic process;GO:0043603//cellular amide metabolic process;GO:1901566//organonitrogen compound biosynthetic process;GO:0009059//macromolecule biosynthetic process;GO:0044085//cellular component biogenesis;GO:0044267//cellular protein metabolic process;GO:0043170//macromolecule metabolic process;GO:0010467//gene expression;GO:1901564//organonitrogen compound me…	[C]cellular anatomical entity;protein-containing complex;intracellular;[P]metabolic process;cellular process;[F]structural molecule activity;	cellular_component;molecular_function;biological_process
isoform_100664
isoform_100675	[P]GO:0006725//cellular aromatic compound metabolic process;GO:0006974//cellular response to DNA damage stimulus;GO:0009987//cellular process;GO:0090304//nucleic acid metabolic process;GO:0046483//heterocycle metabolic process;GO:1901360//organic cyclic compound metabolic process;GO:0006259//DNA metabolic process;GO:0043170//macromolecule metabolic process;GO:0006950//response to stress;GO:004426…	[C]intracellular;cellular anatomical entity;[P]metabolic process;response to stimulus;cellular process;[F]catalytic activity;binding;	molecular_function;cellular_component;biological_process
isoform_100711	[P]GO:0045184//establishment of protein localization;GO:0071705//nitrogen compound transport;GO:0071702//organic substance transport;GO:0051234//establishment of localization;GO:0006810//transport;GO:0046907//intracellular transport;GO:0034613//cellular protein localization;GO:0048193//Golgi vesicle transport;GO:0070727//cellular macromolecule localization;GO:0015833//peptide transport;GO:0051641…	[C]protein-containing complex;intracellular;cellular anatomical entity;[P]cellular process;localization;	cellular_component;biological_process
isoform_100727
isoform_100774	[F]GO:0005524//ATP binding;GO:0097367//carbohydrate derivative binding;GO:0097159//organic cyclic compound binding;GO:0043168//anion binding;GO:0030247//polysaccharide binding;GO:0003824//catalytic activity;GO:1901265//nucleoside phosphate binding;GO:0032553//ribonucleotide binding;GO:0030554//adenyl nucleotide binding;GO:0032555//purine ribonucleotide binding;GO:0030246//carbohydrate binding;GO:…	[F]binding;catalytic activity;	molecular_function
isoform_100808	[P]GO:0051179//localization;GO:0010876//lipid localization;GO:0071702//organic substance transport;GO:0033036//macromolecule localization;GO:0006869//lipid transport;GO:0006810//transport;GO:0051234//establishment of localization;[C]GO:0016020//membrane;GO:0110165//cellular anatomical entity;[F]GO:0005488//binding;GO:0008289//lipid binding;	[C]cellular anatomical entity;[P]localization;[F]binding;	molecular_function;cellular_component;biological_process
isoform_100813
isoform_10086	[P]GO:0009725//response to hormone;GO:0051716//cellular response to stimulus;GO:0071310//cellular response to organic substance;GO:0050896//response to stimulus;GO:0009987//cellular process;GO:0007165//signal transduction;GO:0071495//cellular response to endogenous stimulus;GO:0050789//regulation of biological process;GO:0070887//cellular response to chemical stimulus;GO:0009719//response to endo…	[C]cellular anatomical entity;[P]signaling;cellular process;response to stimulus;biological regulation;[F]catalytic activity;binding;	biological_process;cellular_component;molecular_function
isoform_10087	[F]GO:0005488//binding;GO:0046983//protein dimerization activity;GO:0005515//protein binding;	[F]binding;	molecular_function
isoform_100885	[P]GO:0044260//cellular macromolecule metabolic process;GO:0009059//macromolecule biosynthetic process;GO:0009987//cellular process;GO:0043170//macromolecule metabolic process;GO:0006518//peptide metabolic process;GO:0043604//amide biosynthetic process;GO:0009058//biosynthetic process;GO:0006807//nitrogen compound metabolic process;GO:0034645//cellular macromolecule biosynthetic process;GO:007170…	[C]cellular anatomical entity;intracellular;protein-containing complex;[P]metabolic process;cellular process;[F]structural molecule activity;	molecular_function;biological_process;cellular_component
isoform_100904
isoform_100910
isoform_100958
isoform_100970
isoform_100971
isoform_100991	[P]GO:0009987//cellular process;GO:0006457//protein folding;[C]GO:0016272//prefoldin complex;GO:0032991//protein-containing complex;GO:0005829//cytosol;GO:0110165//cellular anatomical entity;GO:0005737//cytoplasm;GO:0005622//intracellular;[F]GO:0005488//binding;GO:0051082//unfolded protein binding;GO:0005515//protein binding;	[C]protein-containing complex;intracellular;cellular anatomical entity;[P]cellular process;[F]binding;	molecular_function;cellular_component;biological_process
isoform_101027
isoform_101038
isoform_101040
isoform_10106
isoform_101127	[P]GO:0031640//killing of cells of other organism;GO:0042742//defense response to bacterium;GO:0006950//response to stress;GO:0050896//response to stimulus;GO:0043068//positive regulation of programmed cell death;GO:0009620//response to fungus;GO:0043207//response to external biotic stimulus;GO:0048518//positive regulation of biological process;GO:0006952//defense response;GO:0065007//biological …	[C]cellular anatomical entity;[P]cellular process;response to stimulus;biological regulation;interspecies interaction between organisms;[F]binding;molecular function regulator;	cellular_component;molecular_function;biological_process
isoform_101137
isoform_101159	[P]GO:0031497//chromatin assembly;GO:0022607//cellular component assembly;GO:0006323//DNA packaging;GO:0043933//protein-containing complex subunit organization;GO:0034622//cellular protein-containing complex assembly;GO:0034728//nucleosome organization;GO:0016043//cellular component organization;GO:0071824//protein-DNA complex subunit organization;GO:0044085//cellular component biogenesis;GO:0071…	[C]protein-containing complex;cellular anatomical entity;intracellular;[P]cellular process;[F]binding;	biological_process;cellular_component;molecular_function
isoform_101174
isoform_101189
isoform_101197
isoform_101285
isoform_10130	[C]GO:0110165//cellular anatomical entity;GO:0043229//intracellular organelle;GO:0043231//intracellular membrane-bounded organelle;GO:0043227//membrane-bounded organelle;GO:0043226//organelle;GO:0005634//nucleus;GO:0005622//intracellular;[F]GO:0003700//DNA-binding transcription factor activity;GO:0097159//organic cyclic compound binding;GO:1901363//heterocyclic compound binding;GO:0005488//bindin…	[C]intracellular;cellular anatomical entity;[F]transcription regulator activity;binding;	molecular_function;cellular_component
isoform_101300
isoform_101311
isoform_101318
isoform_101340	[P]GO:0016051//carbohydrate biosynthetic process;GO:0046351//disaccharide biosynthetic process;GO:0044262//cellular carbohydrate metabolic process;GO:1901576//organic substance biosynthetic process;GO:0005991//trehalose metabolic process;GO:0044249//cellular biosynthetic process;GO:0005975//carbohydrate metabolic process;GO:0009058//biosynthetic process;GO:0005992//trehalose biosynthetic process;…	[C]intracellular;cellular anatomical entity;[P]metabolic process;cellular process;[F]binding;catalytic activity;	biological_process;cellular_component;molecular_function
isoform_101343
isoform_101346	[P]GO:0010109//regulation of photosynthesis;GO:0031323//regulation of cellular metabolic process;GO:0009987//cellular process;GO:0042549//photosystem II stabilization;GO:0042548//regulation of photosynthesis, light reaction;GO:0008152//metabolic process;GO:0050794//regulation of cellular process;GO:0044237//cellular metabolic process;GO:0065007//biological regulation;GO:0050789//regulation of bio…	[C]cellular anatomical entity;intracellular;protein-containing complex;[P]biological regulation;cellular process;metabolic process;	cellular_component;biological_process
isoform_10139
isoform_101392
isoform_101394
isoform_101416
isoform_101476
isoform_101489
isoform_101498
isoform_101512	[P]GO:0044237//cellular metabolic process;GO:0034645//cellular macromolecule biosynthetic process;GO:0044271//cellular nitrogen compound biosynthetic process;GO:0006351//transcription, DNA-templated;GO:0046483//heterocycle metabolic process;GO:0019438//aromatic compound biosynthetic process;GO:0044249//cellular biosynthetic process;GO:0034654//nucleobase-containing compound biosynthetic process;G…	[P]metabolic process;cellular process;[F]catalytic activity;binding;	molecular_function;biological_process
isoform_101549	[P]GO:0008152//metabolic process;GO:0015979//photosynthesis;GO:0009987//cellular process;GO:0044237//cellular metabolic process;[C]GO:0009521//photosystem;GO:0032991//protein-containing complex;GO:0009579//thylakoid;GO:0016020//membrane;GO:0098796//membrane protein complex;GO:0034357//photosynthetic membrane;GO:0110165//cellular anatomical entity;GO:0005622//intracellular;GO:0009522//photosystem …	[C]intracellular;cellular anatomical entity;protein-containing complex;[P]cellular process;metabolic process;	biological_process;cellular_component
isoform_101562
isoform_101590
isoform_101605	[P]GO:0071704//organic substance metabolic process;GO:0044267//cellular protein metabolic process;GO:0043170//macromolecule metabolic process;GO:0009987//cellular process;GO:1901564//organonitrogen compound metabolic process;GO:0006518//peptide metabolic process;GO:0006412//translation;GO:0008152//metabolic process;GO:0043043//peptide biosynthetic process;GO:1901576//organic substance biosyntheti…	[C]protein-containing complex;intracellular;cellular anatomical entity;[P]cellular process;metabolic process;[F]structural molecule activity;	molecular_function;biological_process;cellular_component
isoform_101609
isoform_101649
isoform_101650	[C]GO:0031224//intrinsic component of membrane;GO:0110165//cellular anatomical entity;GO:0016020//membrane;GO:0016021//integral component of membrane;	[C]cellular anatomical entity;	cellular_component
isoform_101696
isoform_101697
isoform_101741
isoform_101781	[C]GO:0009579//thylakoid;GO:0009534//chloroplast thylakoid;GO:0043226//organelle;GO:0055035//plastid thylakoid membrane;GO:0043227//membrane-bounded organelle;GO:0034357//photosynthetic membrane;GO:0043231//intracellular membrane-bounded organelle;GO:0009536//plastid;GO:0009535//chloroplast thylakoid membrane;GO:0005737//cytoplasm;GO:0042651//thylakoid membrane;GO:0110165//cellular anatomical ent…	[C]cellular anatomical entity;intracellular;[F]catalytic activity;binding;	cellular_component;molecular_function
isoform_101783	[P]GO:0050794//regulation of cellular process;GO:0051252//regulation of RNA metabolic process;GO:0006325//chromatin organization;GO:0097549//chromatin organization involved in negative regulation of transcription;GO:0051171//regulation of nitrogen compound metabolic process;GO:2000112//regulation of cellular macromolecule biosynthetic process;GO:0045934//negative regulation of nucleobase-containi…	[C]cellular anatomical entity;protein-containing complex;intracellular;[P]biological regulation;cellular process;[F]binding;	molecular_function;biological_process;cellular_component
isoform_101793
isoform_101819	[P]GO:0008152//metabolic process;GO:0044237//cellular metabolic process;GO:0009987//cellular process;GO:0015979//photosynthesis;[C]GO:0042651//thylakoid membrane;GO:0009534//chloroplast thylakoid;GO:0032991//protein-containing complex;GO:0009535//chloroplast thylakoid membrane;GO:0016021//integral component of membrane;GO:0043231//intracellular membrane-bounded organelle;GO:0055035//plastid thyla…	[C]intracellular;cellular anatomical entity;protein-containing complex;[P]cellular process;metabolic process;[F]binding;	biological_process;molecular_function;cellular_component
isoform_101851	[P]GO:0006810//transport;GO:0010876//lipid localization;GO:0006869//lipid transport;GO:0051179//localization;GO:0033036//macromolecule localization;GO:0051234//establishment of localization;GO:0071702//organic substance transport;[C]GO:0016020//membrane;GO:0110165//cellular anatomical entity;[F]GO:0005488//binding;GO:0008289//lipid binding;	[C]cellular anatomical entity;[P]localization;[F]binding;	biological_process;molecular_function;cellular_component
isoform_101921	[C]GO:0110165//cellular anatomical entity;GO:0016020//membrane;GO:0031224//intrinsic component of membrane;GO:0016021//integral component of membrane;	[C]cellular anatomical entity;	cellular_component
isoform_10194	[F]GO:0003824//catalytic activity;GO:0043169//cation binding;GO:0016787//hydrolase activity;GO:0016788//hydrolase activity, acting on ester bonds;GO:0046872//metal ion binding;GO:0003993//acid phosphatase activity;GO:0043167//ion binding;GO:0042578//phosphoric ester hydrolase activity;GO:0016791//phosphatase activity;GO:0005488//binding;	[F]catalytic activity;binding;	molecular_function
isoform_101943
isoform_101964
isoform_102017
isoform_102026	[C]GO:0031224//intrinsic component of membrane;GO:0110165//cellular anatomical entity;GO:0016021//integral component of membrane;GO:0016020//membrane;	[C]cellular anatomical entity;	cellular_component
isoform_102045	[P]GO:0019219//regulation of nucleobase-containing compound metabolic process;GO:0010556//regulation of macromolecule biosynthetic process;GO:1902679//negative regulation of RNA biosynthetic process;GO:0006325//chromatin organization;GO:0050789//regulation of biological process;GO:0031326//regulation of cellular biosynthetic process;GO:0031324//negative regulation of cellular metabolic process;GO…	[C]protein-containing complex;intracellular;cellular anatomical entity;[P]cellular process;biological regulation;[F]binding;	cellular_component;molecular_function;biological_process
isoform_102065
isoform_102066
isoform_10208	[P]GO:0015740//C4-dicarboxylate transport;GO:0051234//establishment of localization;GO:0015711//organic anion transport;GO:0046942//carboxylic acid transport;GO:0015849//organic acid transport;GO:0015743//malate transport;GO:0006811//ion transport;GO:0051179//localization;GO:0006820//anion transport;GO:0006835//dicarboxylic acid transport;GO:0006810//transport;GO:0071702//organic substance transp…	[C]cellular anatomical entity;[P]localization;	biological_process;cellular_component
isoform_102081
isoform_102104	[P]GO:0043170//macromolecule metabolic process;GO:0051604//protein maturation;GO:0008152//metabolic process;GO:0006508//proteolysis;GO:1901564//organonitrogen compound metabolic process;GO:0016539//intein-mediated protein splicing;GO:0010467//gene expression;GO:0030908//protein splicing;GO:0071704//organic substance metabolic process;GO:0016485//protein processing;GO:0006807//nitrogen compound me…	[C]cellular anatomical entity;[P]metabolic process;	biological_process;cellular_component
isoform_102108
isoform_102129
isoform_102132	[P]GO:0015979//photosynthesis;GO:0044237//cellular metabolic process;GO:0009987//cellular process;GO:0008152//metabolic process;[C]GO:0005622//intracellular;GO:0042651//thylakoid membrane;GO:0016021//integral component of membrane;GO:0032991//protein-containing complex;GO:0098796//membrane protein complex;GO:0009521//photosystem;GO:0110165//cellular anatomical entity;GO:0031224//intrinsic compone…	[C]cellular anatomical entity;protein-containing complex;intracellular;[P]cellular process;metabolic process;	cellular_component;biological_process
isoform_10217
isoform_102176
isoform_102234
isoform_102235	[P]GO:0009987//cellular process;GO:0008152//metabolic process;GO:0044237//cellular metabolic process;GO:0015979//photosynthesis;[C]GO:0009507//chloroplast;GO:0005622//intracellular;GO:0009523//photosystem II;GO:0009579//thylakoid;GO:0016021//integral component of membrane;GO:0043231//intracellular membrane-bounded organelle;GO:0098796//membrane protein complex;GO:0016020//membrane;GO:0031224//int…	[C]cellular anatomical entity;intracellular;protein-containing complex;[P]metabolic process;cellular process;[F]binding;	cellular_component;biological_process;molecular_function
isoform_102254
isoform_102269	[C]GO:0110165//cellular anatomical entity;GO:0016020//membrane;GO:0016021//integral component of membrane;GO:0031224//intrinsic component of membrane;	[C]cellular anatomical entity;	cellular_component
isoform_102347
isoform_102356	[F]GO:0016853//isomerase activity;GO:0016872//intramolecular lyase activity;GO:0003824//catalytic activity;	[F]catalytic activity;	molecular_function
isoform_102385	[C]GO:0031224//intrinsic component of membrane;GO:0110165//cellular anatomical entity;GO:0016020//membrane;GO:0016021//integral component of membrane;	[C]cellular anatomical entity;	cellular_component
isoform_10239	[P]GO:0023052//signaling;GO:0032870//cellular response to hormone stimulus;GO:0051171//regulation of nitrogen compound metabolic process;GO:0051252//regulation of RNA metabolic process;GO:0010033//response to organic substance;GO:0051716//cellular response to stimulus;GO:0019222//regulation of metabolic process;GO:1903506//regulation of nucleic acid-templated transcription;GO:0009725//response to…	[C]cellular anatomical entity;intracellular;[P]biological regulation;cellular process;signaling;response to stimulus;	biological_process;cellular_component
isoform_102425	[P]GO:0050789//regulation of biological process;GO:0051246//regulation of protein metabolic process;GO:0009892//negative regulation of metabolic process;GO:0010556//regulation of macromolecule biosynthetic process;GO:0009889//regulation of biosynthetic process;GO:0032268//regulation of cellular protein metabolic process;GO:2000112//regulation of cellular macromolecule biosynthetic process;GO:0017…	[C]cellular anatomical entity;intracellular;[P]cellular process;biological regulation;response to stimulus;	cellular_component;biological_process
isoform_102548
isoform_102552	[C]GO:0043226//organelle;GO:0043227//membrane-bounded organelle;GO:0033647//host intracellular organelle;GO:0043231//intracellular membrane-bounded organelle;GO:0043228//non-membrane-bounded organelle;GO:0032993//protein-DNA complex;GO:0000786//nucleosome;GO:0005634//nucleus;GO:0005694//chromosome;GO:0043656//host intracellular region;GO:0005622//intracellular;GO:0018995//host cellular component;…	[C]intracellular;cellular anatomical entity;protein-containing complex;[F]binding;	molecular_function;cellular_component
isoform_102561	[P]GO:0006811//ion transport;GO:0006810//transport;GO:0055085//transmembrane transport;GO:0009987//cellular process;GO:0034220//ion transmembrane transport;GO:0051179//localization;GO:0051234//establishment of localization;[C]GO:0098588//bounding membrane of organelle;GO:0031354//intrinsic component of plastid outer membrane;GO:0031355//integral component of plastid outer membrane;GO:0031975//env…	[C]cellular anatomical entity;intracellular;[P]localization;cellular process;[F]transporter activity;	biological_process;cellular_component;molecular_function
isoform_1026	[F]GO:0016773//phosphotransferase activity, alcohol group as acceptor;GO:0140096//catalytic activity, acting on a protein;GO:0000155//phosphorelay sensor kinase activity;GO:0016772//transferase activity, transferring phosphorus-containing groups;GO:0004673//protein histidine kinase activity;GO:0004672//protein kinase activity;GO:0016301//kinase activity;GO:0003824//catalytic activity;GO:0016775//…	[F]small molecule sensor activity;catalytic activity;	molecular_function
isoform_102612	[C]GO:0031224//intrinsic component of membrane;GO:0016020//membrane;GO:0110165//cellular anatomical entity;GO:0016021//integral component of membrane;	[C]cellular anatomical entity;	cellular_component
isoform_102624
isoform_102646
isoform_10267	[P]GO:0009987//cellular process;GO:0006457//protein folding;[F]GO:0043167//ion binding;GO:0035639//purine ribonucleoside triphosphate binding;GO:0005524//ATP binding;GO:0036094//small molecule binding;GO:0000166//nucleotide binding;GO:0097159//organic cyclic compound binding;GO:0005488//binding;GO:0005515//protein binding;GO:0017076//purine nucleotide binding;GO:0097367//carbohydrate derivative b…	[P]cellular process;[F]binding;	molecular_function;biological_process
isoform_102696
isoform_10272	[P]GO:0051253//negative regulation of RNA metabolic process;GO:0051252//regulation of RNA metabolic process;GO:2000113//negative regulation of cellular macromolecule biosynthetic process;GO:0060255//regulation of macromolecule metabolic process;GO:0048523//negative regulation of cellular process;GO:0010558//negative regulation of macromolecule biosynthetic process;GO:0031326//regulation of cellul…	[P]biological regulation;[F]binding;	molecular_function;biological_process
isoform_102742	[C]GO:0043227//membrane-bounded organelle;GO:0005622//intracellular;GO:0032991//protein-containing complex;GO:0000785//chromatin;GO:0043228//non-membrane-bounded organelle;GO:0110165//cellular anatomical entity;GO:0000786//nucleosome;GO:0043231//intracellular membrane-bounded organelle;GO:0043229//intracellular organelle;GO:0044815//DNA packaging complex;GO:0043232//intracellular non-membrane-bou…	[C]cellular anatomical entity;intracellular;protein-containing complex;[F]binding;	molecular_function;cellular_component
isoform_102773	[C]GO:0005622//intracellular;GO:0043226//organelle;GO:0043229//intracellular organelle;GO:0043228//non-membrane-bounded organelle;GO:0043232//intracellular non-membrane-bounded organelle;GO:0110165//cellular anatomical entity;GO:0005840//ribosome;	[C]cellular anatomical entity;intracellular;	cellular_component
isoform_102781
isoform_102799
isoform_102814	[C]GO:0044815//DNA packaging complex;GO:0032993//protein-DNA complex;GO:0005694//chromosome;GO:0016020//membrane;GO:0043227//membrane-bounded organelle;GO:0032991//protein-containing complex;GO:0000786//nucleosome;GO:0043232//intracellular non-membrane-bounded organelle;GO:0005622//intracellular;GO:0043226//organelle;GO:0000785//chromatin;GO:0043231//intracellular membrane-bounded organelle;GO:00…	[C]intracellular;cellular anatomical entity;protein-containing complex;[F]binding;	cellular_component;molecular_function
isoform_102820	[P]GO:0009309//amine biosynthetic process;GO:0008652//cellular amino acid biosynthetic process;GO:0044249//cellular biosynthetic process;GO:0044106//cellular amine metabolic process;GO:0046483//heterocycle metabolic process;GO:1901566//organonitrogen compound biosynthetic process;GO:0009072//aromatic amino acid family metabolic process;GO:0018130//heterocycle biosynthetic process;GO:0006576//cell…	[P]cellular process;metabolic process;[F]catalytic activity;binding;	biological_process;molecular_function
isoform_102854
isoform_102856
isoform_102876	[C]GO:0005622//intracellular;GO:0000786//nucleosome;GO:0043226//organelle;GO:0000785//chromatin;GO:0016021//integral component of membrane;GO:0032991//protein-containing complex;GO:0043231//intracellular membrane-bounded organelle;GO:0043228//non-membrane-bounded organelle;GO:0044815//DNA packaging complex;GO:0016020//membrane;GO:0005694//chromosome;GO:0032993//protein-DNA complex;GO:0043232//int…	[C]cellular anatomical entity;protein-containing complex;intracellular;[F]binding;	cellular_component;molecular_function
isoform_102881	[P]GO:0005976//polysaccharide metabolic process;GO:0044238//primary metabolic process;GO:0045488//pectin metabolic process;GO:0009057//macromolecule catabolic process;GO:0016052//carbohydrate catabolic process;GO:0000272//polysaccharide catabolic process;GO:0008152//metabolic process;GO:0071554//cell wall organization or biogenesis;GO:0010393//galacturonan metabolic process;GO:0042545//cell wall …	[P]metabolic process;cellular process;[F]catalytic activity;	molecular_function;biological_process
isoform_102924	[F]GO:0003723//RNA binding;GO:0003676//nucleic acid binding;GO:0005488//binding;GO:0097159//organic cyclic compound binding;GO:1901363//heterocyclic compound binding;	[F]binding;	molecular_function
isoform_102938
isoform_102942	[P]GO:0009987//cellular process;GO:0071554//cell wall organization or biogenesis;GO:0009664//plant-type cell wall organization;GO:0071669//plant-type cell wall organization or biogenesis;GO:0045229//external encapsulating structure organization;GO:0016043//cellular component organization;GO:0071555//cell wall organization;GO:0071840//cellular component organization or biogenesis;[C]GO:0071944//ce…	[C]cellular anatomical entity;[P]cellular process;	biological_process;cellular_component
isoform_102944
isoform_102945	[P]GO:0007165//signal transduction;GO:0071310//cellular response to organic substance;GO:0010033//response to organic substance;GO:0051716//cellular response to stimulus;GO:0009725//response to hormone;GO:0009719//response to endogenous stimulus;GO:0032870//cellular response to hormone stimulus;GO:0009737//response to abscisic acid;GO:0006952//defense response;GO:0042221//response to chemical;GO:…	[P]response to stimulus;signaling;biological regulation;cellular process;[F]molecular transducer activity;molecular function regulator;binding;	biological_process;molecular_function
isoform_102967
isoform_102982
isoform_102985
isoform_103002	[F]GO:0046914//transition metal ion binding;GO:0043169//cation binding;GO:0005506//iron ion binding;GO:0005488//binding;GO:0046872//metal ion binding;GO:0043167//ion binding;	[F]binding;	molecular_function
isoform_103035
isoform_10306	[P]GO:0007165//signal transduction;GO:0007154//cell communication;GO:0065007//biological regulation;GO:0009056//catabolic process;GO:0050896//response to stimulus;GO:0051716//cellular response to stimulus;GO:0008152//metabolic process;GO:0006629//lipid metabolic process;GO:0071704//organic substance metabolic process;GO:0009987//cellular process;GO:0035556//intracellular signal transduction;GO:00…	[P]signaling;metabolic process;cellular process;biological regulation;response to stimulus;[F]catalytic activity;	biological_process;molecular_function
isoform_103076	[P]GO:0006457//protein folding;GO:0042026//protein refolding;GO:0009987//cellular process;[C]GO:0043231//intracellular membrane-bounded organelle;GO:0009507//chloroplast;GO:0071944//cell periphery;GO:0110165//cellular anatomical entity;GO:0043226//organelle;GO:0005737//cytoplasm;GO:0005829//cytosol;GO:0005886//plasma membrane;GO:0012505//endomembrane system;GO:0043227//membrane-bounded organelle;…	[C]intracellular;cellular anatomical entity;[P]cellular process;[F]catalytic activity;binding;	biological_process;cellular_component;molecular_function
isoform_103104	[C]GO:0110165//cellular anatomical entity;GO:0031224//intrinsic component of membrane;GO:0016021//integral component of membrane;GO:0016020//membrane;	[C]cellular anatomical entity;	cellular_component
isoform_103109
isoform_103160
isoform_103177	[F]GO:0003824//catalytic activity;GO:0016787//hydrolase activity;	[F]catalytic activity;	molecular_function
isoform_103199	[C]GO:0110165//cellular anatomical entity;GO:0016021//integral component of membrane;GO:0016020//membrane;GO:0031224//intrinsic component of membrane;[F]GO:0043169//cation binding;GO:0097159//organic cyclic compound binding;GO:0005488//binding;GO:0020037//heme binding;GO:0043167//ion binding;GO:0046872//metal ion binding;GO:0046906//tetrapyrrole binding;GO:1901363//heterocyclic compound binding;	[C]cellular anatomical entity;[F]binding;	cellular_component;molecular_function
isoform_103207
isoform_103210
isoform_10322	[P]GO:1901566//organonitrogen compound biosynthetic process;GO:0019438//aromatic compound biosynthetic process;GO:0034641//cellular nitrogen compound metabolic process;GO:0044237//cellular metabolic process;GO:1901564//organonitrogen compound metabolic process;GO:0009987//cellular process;GO:0071704//organic substance metabolic process;GO:0033013//tetrapyrrole metabolic process;GO:1901360//organi…	[C]cellular anatomical entity;intracellular;[P]metabolic process;cellular process;[F]binding;catalytic activity;	cellular_component;molecular_function;biological_process
isoform_103332
isoform_103343
isoform_103354
isoform_10336	[P]GO:0044238//primary metabolic process;GO:0071704//organic substance metabolic process;GO:0006629//lipid metabolic process;GO:0008152//metabolic process;[C]GO:0016020//membrane;GO:0031224//intrinsic component of membrane;GO:0110165//cellular anatomical entity;GO:0016021//integral component of membrane;	[C]cellular anatomical entity;[P]metabolic process;	biological_process;cellular_component
isoform_10339	[F]GO:0043167//ion binding;GO:0046872//metal ion binding;GO:0016491//oxidoreductase activity;GO:0005507//copper ion binding;GO:0046914//transition metal ion binding;GO:0005488//binding;GO:0003824//catalytic activity;GO:0043169//cation binding;	[F]binding;catalytic activity;	molecular_function
isoform_103398
isoform_103453	[P]GO:0044237//cellular metabolic process;GO:0008152//metabolic process;GO:0015979//photosynthesis;GO:0009987//cellular process;[C]GO:0098796//membrane protein complex;GO:0009579//thylakoid;GO:0034357//photosynthetic membrane;GO:0009538//photosystem I reaction center;GO:0009522//photosystem I;GO:0009521//photosystem;GO:0032991//protein-containing complex;GO:0110165//cellular anatomical entity;GO:…	[C]intracellular;cellular anatomical entity;protein-containing complex;[P]cellular process;metabolic process;	cellular_component;biological_process
isoform_103465
isoform_103495
isoform_103514
isoform_10354	[P]GO:0007049//cell cycle;GO:0008152//metabolic process;GO:0022402//cell cycle process;GO:0044237//cellular metabolic process;GO:0065009//regulation of molecular function;GO:1901564//organonitrogen compound metabolic process;GO:0019538//protein metabolic process;GO:0050790//regulation of catalytic activity;GO:0006793//phosphorus metabolic process;GO:0051246//regulation of protein metabolic proces…	[C]intracellular;cellular anatomical entity;protein-containing complex;[P]biological regulation;metabolic process;cellular process;[F]binding;molecular function regulator;	cellular_component;molecular_function;biological_process
isoform_103659	[F]GO:0016787//hydrolase activity;GO:0003824//catalytic activity;	[F]catalytic activity;	molecular_function
isoform_103674
isoform_103704
isoform_103780	[P]GO:0050789//regulation of biological process;GO:0050794//regulation of cellular process;GO:0065007//biological regulation;GO:0065008//regulation of biological quality;GO:0042592//homeostatic process;GO:0009987//cellular process;GO:0045454//cell redox homeostasis;GO:0019725//cellular homeostasis;[F]GO:0003824//catalytic activity;GO:0009055//electron transfer activity;GO:0016491//oxidoreductase …	[P]cellular process;biological regulation;[F]catalytic activity;	biological_process;molecular_function
isoform_103844
isoform_10386	[F]GO:0016740//transferase activity;GO:0003824//catalytic activity;	[F]catalytic activity;	molecular_function
isoform_103972
isoform_103973	[F]GO:0005488//binding;GO:0046872//metal ion binding;GO:0043167//ion binding;GO:0043169//cation binding;	[F]binding;	molecular_function
isoform_103981	[P]GO:0006091//generation of precursor metabolites and energy;GO:0008152//metabolic process;GO:0022900//electron transport chain;GO:0042775//mitochondrial ATP synthesis coupled electron transport;GO:0006119//oxidative phosphorylation;GO:0006793//phosphorus metabolic process;GO:0009060//aerobic respiration;GO:0006123//mitochondrial electron transport, cytochrome c to oxygen;GO:0042773//ATP synthes…	[C]intracellular;cellular anatomical entity;[P]metabolic process;cellular process;[F]catalytic activity;binding;	biological_process;cellular_component;molecular_function
isoform_10402	[F]GO:0043167//ion binding;GO:0043169//cation binding;GO:0005488//binding;GO:0046872//metal ion binding;	[F]binding;	molecular_function
isoform_104058
isoform_104073
isoform_104091	[P]GO:0010109//regulation of photosynthesis;GO:0019222//regulation of metabolic process;GO:0065007//biological regulation;GO:0050794//regulation of cellular process;GO:0042549//photosystem II stabilization;GO:0050789//regulation of biological process;GO:0043467//regulation of generation of precursor metabolites and energy;GO:0015979//photosynthesis;GO:0008152//metabolic process;GO:0009987//cellul…	[C]intracellular;protein-containing complex;cellular anatomical entity;[P]metabolic process;cellular process;biological regulation;	cellular_component;biological_process
isoform_104132
isoform_104146	[P]GO:0009987//cellular process;GO:0042548//regulation of photosynthesis, light reaction;GO:0043467//regulation of generation of precursor metabolites and energy;GO:0044237//cellular metabolic process;GO:0031323//regulation of cellular metabolic process;GO:0010109//regulation of photosynthesis;GO:0008152//metabolic process;GO:0050794//regulation of cellular process;GO:0042549//photosystem II stab…	[C]protein-containing complex;intracellular;cellular anatomical entity;[P]metabolic process;biological regulation;cellular process;	cellular_component;biological_process
isoform_104171
isoform_104206	[F]GO:0005488//binding;GO:0030246//carbohydrate binding;	[F]binding;	molecular_function
isoform_104227
isoform_104231	[P]GO:0044238//primary metabolic process;GO:0006396//RNA processing;GO:0090304//nucleic acid metabolic process;GO:0010467//gene expression;GO:0008152//metabolic process;GO:0009987//cellular process;GO:0044237//cellular metabolic process;GO:0000375//RNA splicing, via transesterification reactions;GO:0016071//mRNA metabolic process;GO:0046483//heterocycle metabolic process;GO:0043170//macromolecule…	[C]cellular anatomical entity;intracellular;protein-containing complex;[P]metabolic process;cellular process;	biological_process;cellular_component
isoform_104320
isoform_10433	[P]GO:0044238//primary metabolic process;GO:0010393//galacturonan metabolic process;GO:0045488//pectin metabolic process;GO:0005976//polysaccharide metabolic process;GO:0009056//catabolic process;GO:0071555//cell wall organization;GO:1901575//organic substance catabolic process;GO:0008152//metabolic process;GO:0071704//organic substance metabolic process;GO:0009057//macromolecule catabolic proces…	[C]cellular anatomical entity;[P]metabolic process;cellular process;[F]molecular function regulator;catalytic activity;	molecular_function;biological_process;cellular_component
isoform_10436	[P]GO:0046148//pigment biosynthetic process;GO:0008152//metabolic process;GO:0044271//cellular nitrogen compound biosynthetic process;GO:1901566//organonitrogen compound biosynthetic process;GO:1901362//organic cyclic compound biosynthetic process;GO:1901576//organic substance biosynthetic process;GO:0034641//cellular nitrogen compound metabolic process;GO:0033014//tetrapyrrole biosynthetic proce…	[C]intracellular;cellular anatomical entity;[P]cellular process;metabolic process;[F]catalytic activity;binding;	cellular_component;molecular_function;biological_process
isoform_104376
isoform_104385
isoform_104393
isoform_104411	[C]GO:0016021//integral component of membrane;GO:0031224//intrinsic component of membrane;GO:0016020//membrane;GO:0110165//cellular anatomical entity;	[C]cellular anatomical entity;	cellular_component
isoform_104441
isoform_104466	[C]GO:0031224//intrinsic component of membrane;GO:0016020//membrane;GO:0110165//cellular anatomical entity;GO:0016021//integral component of membrane;	[C]cellular anatomical entity;	cellular_component
isoform_104507	[F]GO:0005488//binding;GO:0030246//carbohydrate binding;	[F]binding;	molecular_function
isoform_104533
isoform_104571
isoform_104579
isoform_104597	[P]GO:0023052//signaling;GO:0070887//cellular response to chemical stimulus;GO:0050896//response to stimulus;GO:0065007//biological regulation;GO:0009719//response to endogenous stimulus;GO:0009755//hormone-mediated signaling pathway;GO:0006952//defense response;GO:0010033//response to organic substance;GO:1901701//cellular response to oxygen-containing compound;GO:1901700//response to oxygen-con…	[P]cellular process;response to stimulus;signaling;biological regulation;[F]molecular transducer activity;binding;molecular function regulator;	molecular_function;biological_process
isoform_104643
isoform_104649	[P]GO:0009987//cellular process;GO:0008152//metabolic process;GO:0044237//cellular metabolic process;GO:0015979//photosynthesis;[C]GO:0016020//membrane;GO:0009521//photosystem;GO:0032991//protein-containing complex;GO:0005622//intracellular;GO:0110165//cellular anatomical entity;GO:0009538//photosystem I reaction center;GO:0034357//photosynthetic membrane;GO:0009522//photosystem I;GO:0098796//mem…	[C]cellular anatomical entity;protein-containing complex;intracellular;[P]cellular process;metabolic process;	biological_process;cellular_component
isoform_104672
isoform_104710
isoform_104719
isoform_104729	[P]GO:0036211//protein modification process;GO:0019684//photosynthesis, light reaction;GO:0009765//photosynthesis, light harvesting;GO:0009987//cellular process;GO:0071704//organic substance metabolic process;GO:1901564//organonitrogen compound metabolic process;GO:0044238//primary metabolic process;GO:0043412//macromolecule modification;GO:0008152//metabolic process;GO:0006807//nitrogen compound…	[C]protein-containing complex;intracellular;cellular anatomical entity;[P]metabolic process;cellular process;[F]binding;	biological_process;cellular_component;molecular_function
isoform_104730	[P]GO:0051179//localization;GO:0006869//lipid transport;GO:0010876//lipid localization;GO:0071702//organic substance transport;GO:0006810//transport;GO:0051234//establishment of localization;GO:0033036//macromolecule localization;[F]GO:0008289//lipid binding;GO:0005488//binding;	[P]localization;[F]binding;	molecular_function;biological_process
isoform_104786	[C]GO:0016020//membrane;GO:0031224//intrinsic component of membrane;GO:0110165//cellular anatomical entity;GO:0016021//integral component of membrane;[F]GO:0016772//transferase activity, transferring phosphorus-containing groups;GO:0005524//ATP binding;GO:0032553//ribonucleotide binding;GO:0004672//protein kinase activity;GO:0016301//kinase activity;GO:0016773//phosphotransferase activity, alcoho…	[C]cellular anatomical entity;[F]binding;catalytic activity;	molecular_function;cellular_component
isoform_10482	[P]GO:0065008//regulation of biological quality;GO:0006811//ion transport;GO:0050801//ion homeostasis;GO:0098771//inorganic ion homeostasis;GO:0019439//aromatic compound catabolic process;GO:0006810//transport;GO:0055080//cation homeostasis;GO:1901361//organic cyclic compound catabolic process;GO:0009698//phenylpropanoid metabolic process;GO:0044237//cellular metabolic process;GO:0051234//establi…	[C]cellular anatomical entity;[P]cellular process;localization;biological regulation;metabolic process;[F]binding;catalytic activity;	biological_process;molecular_function;cellular_component
isoform_104882	[P]GO:0043170//macromolecule metabolic process;GO:0009058//biosynthetic process;GO:0032774//RNA biosynthetic process;GO:0034645//cellular macromolecule biosynthetic process;GO:0008152//metabolic process;GO:0044249//cellular biosynthetic process;GO:0044238//primary metabolic process;GO:0046483//heterocycle metabolic process;GO:1901362//organic cyclic compound biosynthetic process;GO:0006807//nitro…	[C]cellular anatomical entity;intracellular;protein-containing complex;[P]cellular process;metabolic process;[F]binding;	molecular_function;cellular_component;biological_process
isoform_104922	[C]GO:0110165//cellular anatomical entity;GO:0016021//integral component of membrane;GO:0031224//intrinsic component of membrane;GO:0016020//membrane;	[C]cellular anatomical entity;	cellular_component
isoform_104990
isoform_105005	[C]GO:0110165//cellular anatomical entity;GO:0031224//intrinsic component of membrane;GO:0016020//membrane;GO:0016021//integral component of membrane;	[C]cellular anatomical entity;	cellular_component
isoform_105010	[C]GO:0016021//integral component of membrane;GO:0031224//intrinsic component of membrane;GO:0016020//membrane;GO:0110165//cellular anatomical entity;[F]GO:0005506//iron ion binding;GO:0046906//tetrapyrrole binding;GO:0004497//monooxygenase activity;GO:0046872//metal ion binding;GO:0016491//oxidoreductase activity;GO:0020037//heme binding;GO:0016705//oxidoreductase activity, acting on paired dono…	[C]cellular anatomical entity;[F]catalytic activity;binding;	cellular_component;molecular_function
isoform_105021
isoform_105071
isoform_105110
isoform_105138	[C]GO:0016020//membrane;GO:0110165//cellular anatomical entity;GO:0016021//integral component of membrane;GO:0031224//intrinsic component of membrane;	[C]cellular anatomical entity;	cellular_component
isoform_10514	[F]GO:0016887//ATPase activity;GO:0035639//purine ribonucleoside triphosphate binding;GO:0097159//organic cyclic compound binding;GO:0000166//nucleotide binding;GO:0003824//catalytic activity;GO:0036094//small molecule binding;GO:0017076//purine nucleotide binding;GO:0016787//hydrolase activity;GO:0032555//purine ribonucleotide binding;GO:0043168//anion binding;GO:1901265//nucleoside phosphate bi…	[F]catalytic activity;binding;	molecular_function
isoform_105142
isoform_105150	[P]GO:1902679//negative regulation of RNA biosynthetic process;GO:0097549//chromatin organization involved in negative regulation of transcription;GO:1903506//regulation of nucleic acid-templated transcription;GO:0009987//cellular process;GO:0009889//regulation of biosynthetic process;GO:0051252//regulation of RNA metabolic process;GO:2001141//regulation of RNA biosynthetic process;GO:0031323//re…	[C]protein-containing complex;intracellular;cellular anatomical entity;[P]biological regulation;cellular process;[F]binding;	molecular_function;biological_process;cellular_component
isoform_105215
isoform_105227	[P]GO:0008152//metabolic process;GO:0009987//cellular process;GO:0044237//cellular metabolic process;GO:0015979//photosynthesis;[C]GO:0032991//protein-containing complex;GO:0034357//photosynthetic membrane;GO:0009522//photosystem I;GO:0016020//membrane;GO:0005622//intracellular;GO:0098796//membrane protein complex;GO:0110165//cellular anatomical entity;GO:0009521//photosystem;GO:0009579//thylakoi…	[C]intracellular;cellular anatomical entity;protein-containing complex;[P]cellular process;metabolic process;	biological_process;cellular_component
isoform_10529	[C]GO:0110165//cellular anatomical entity;GO:0031224//intrinsic component of membrane;GO:0016021//integral component of membrane;GO:0016020//membrane;[F]GO:0036094//small molecule binding;GO:0032555//purine ribonucleotide binding;GO:0008237//metallopeptidase activity;GO:0140096//catalytic activity, acting on a protein;GO:0004175//endopeptidase activity;GO:0070011//peptidase activity, acting on L-…	[C]cellular anatomical entity;[F]binding;catalytic activity;	molecular_function;cellular_component
isoform_105334
isoform_105392
isoform_105431
isoform_10547
isoform_105495
isoform_105505
isoform_105548
isoform_105663
isoform_105707
isoform_105741
isoform_105819	[C]GO:0016021//integral component of membrane;GO:0016020//membrane;GO:0110165//cellular anatomical entity;GO:0031224//intrinsic component of membrane;	[C]cellular anatomical entity;	cellular_component
isoform_105860
isoform_105861
isoform_105869
isoform_105878
isoform_105889	[F]GO:1901363//heterocyclic compound binding;GO:0005488//binding;GO:0097159//organic cyclic compound binding;GO:0003676//nucleic acid binding;GO:0003723//RNA binding;	[F]binding;	molecular_function
isoform_105897	[P]GO:0009415//response to water;GO:0009414//response to water deprivation;GO:0050896//response to stimulus;GO:1901700//response to oxygen-containing compound;GO:0032501//multicellular organismal process;GO:0022414//reproductive process;GO:0000003//reproduction;GO:0006970//response to osmotic stress;GO:0010154//fruit development;GO:0048731//system development;GO:0048608//reproductive structure de…	[C]intracellular;cellular anatomical entity;[P]developmental process;multicellular organismal process;reproduction;reproductive process;response to stimulus;	biological_process;cellular_component
isoform_105918	[P]GO:0065004//protein-DNA complex assembly;GO:0022607//cellular component assembly;GO:0065003//protein-containing complex assembly;GO:0071840//cellular component organization or biogenesis;GO:0006996//organelle organization;GO:0006323//DNA packaging;GO:0009987//cellular process;GO:0006333//chromatin assembly or disassembly;GO:0031497//chromatin assembly;GO:0034728//nucleosome organization;GO:001…	[C]protein-containing complex;intracellular;cellular anatomical entity;[P]cellular process;[F]binding;	cellular_component;molecular_function;biological_process
isoform_105924
isoform_105960	[P]GO:0009987//cellular process;GO:0007017//microtubule-based process;GO:0006928//movement of cell or subcellular component;GO:0007018//microtubule-based movement;[C]GO:0005929//cilium;GO:0110165//cellular anatomical entity;GO:0031514//motile cilium;GO:0043226//organelle;GO:0005737//cytoplasm;GO:0030286//dynein complex;GO:0005856//cytoskeleton;GO:0099512//supramolecular fiber;GO:0043232//intracel…	[C]cellular anatomical entity;intracellular;protein-containing complex;[P]cellular process;[F]catalytic activity;binding;	biological_process;cellular_component;molecular_function
isoform_105965	[P]GO:0071702//organic substance transport;GO:0015833//peptide transport;GO:0072321//chaperone-mediated protein transport;GO:0008104//protein localization;GO:0071705//nitrogen compound transport;GO:0015031//protein transport;GO:0006810//transport;GO:0042886//amide transport;GO:0051234//establishment of localization;GO:0051179//localization;GO:0045184//establishment of protein localization;GO:0033…	[C]intracellular;cellular anatomical entity;[P]localization;[F]binding;	cellular_component;molecular_function;biological_process
isoform_105976
isoform_1060	[P]GO:0043412//macromolecule modification;GO:0008152//metabolic process;GO:0006486//protein glycosylation;GO:0044260//cellular macromolecule metabolic process;GO:0044237//cellular metabolic process;GO:1901135//carbohydrate derivative metabolic process;GO:0044267//cellular protein metabolic process;GO:0019538//protein metabolic process;GO:0006807//nitrogen compound metabolic process;GO:0043413//ma…	[C]cellular anatomical entity;[P]metabolic process;cellular process;[F]catalytic activity;	biological_process;cellular_component;molecular_function
isoform_106001	[C]GO:0031224//intrinsic component of membrane;GO:0110165//cellular anatomical entity;GO:0016021//integral component of membrane;GO:0016020//membrane;	[C]cellular anatomical entity;	cellular_component
isoform_106002
isoform_106030	[C]GO:0016020//membrane;GO:0016021//integral component of membrane;GO:0031224//intrinsic component of membrane;GO:0110165//cellular anatomical entity;	[C]cellular anatomical entity;	cellular_component
isoform_106080
isoform_106097
isoform_106137
isoform_106150	[P]GO:0015979//photosynthesis;GO:0008152//metabolic process;GO:0044237//cellular metabolic process;GO:0009987//cellular process;[C]GO:0005737//cytoplasm;GO:0043229//intracellular organelle;GO:0009536//plastid;GO:0055035//plastid thylakoid membrane;GO:0009521//photosystem;GO:0034357//photosynthetic membrane;GO:0043227//membrane-bounded organelle;GO:0009507//chloroplast;GO:0031976//plastid thylakoi…	[C]cellular anatomical entity;protein-containing complex;intracellular;[P]cellular process;metabolic process;	cellular_component;biological_process
isoform_106174
isoform_10621	[P]GO:0006457//protein folding;GO:0009987//cellular process;[F]GO:0032555//purine ribonucleotide binding;GO:0035639//purine ribonucleoside triphosphate binding;GO:0030554//adenyl nucleotide binding;GO:0005524//ATP binding;GO:0005515//protein binding;GO:0032553//ribonucleotide binding;GO:0017076//purine nucleotide binding;GO:0051082//unfolded protein binding;GO:0005488//binding;GO:0043167//ion bin…	[P]cellular process;[F]binding;	molecular_function;biological_process
isoform_106218
isoform_106248
isoform_106305
isoform_106333
isoform_106337
isoform_106368	[P]GO:0007017//microtubule-based process;GO:0009987//cellular process;[C]GO:0005856//cytoskeleton;GO:0005874//microtubule;GO:0005737//cytoplasm;GO:0099081//supramolecular polymer;GO:0099513//polymeric cytoskeletal fiber;GO:0110165//cellular anatomical entity;GO:0043229//intracellular organelle;GO:0005622//intracellular;GO:0099512//supramolecular fiber;GO:0043226//organelle;GO:0099080//supramolecu…	[C]intracellular;cellular anatomical entity;[P]cellular process;[F]structural molecule activity;binding;catalytic activity;	molecular_function;biological_process;cellular_component
isoform_10638	[P]GO:0006812//cation transport;GO:0048878//chemical homeostasis;GO:0000041//transition metal ion transport;GO:0065007//biological regulation;GO:0065008//regulation of biological quality;GO:0006810//transport;GO:0055065//metal ion homeostasis;GO:0006826//iron ion transport;GO:0055080//cation homeostasis;GO:0055076//transition metal ion homeostasis;GO:0098771//inorganic ion homeostasis;GO:0051179/…	[C]cellular anatomical entity;[P]biological regulation;localization;[F]binding;catalytic activity;	biological_process;cellular_component;molecular_function
isoform_106386	[C]GO:0016021//integral component of membrane;GO:0031224//intrinsic component of membrane;GO:0110165//cellular anatomical entity;GO:0016020//membrane;	[C]cellular anatomical entity;	cellular_component
isoform_106389	[F]GO:0097159//organic cyclic compound binding;GO:0003723//RNA binding;GO:0003676//nucleic acid binding;GO:1901363//heterocyclic compound binding;GO:0005488//binding;	[F]binding;	molecular_function
isoform_106423	[C]GO:0016020//membrane;GO:0110165//cellular anatomical entity;GO:0031224//intrinsic component of membrane;GO:0016021//integral component of membrane;	[C]cellular anatomical entity;	cellular_component
isoform_106499
isoform_106526
isoform_106630
isoform_106661	[P]GO:0006807//nitrogen compound metabolic process;GO:1901566//organonitrogen compound biosynthetic process;GO:1901576//organic substance biosynthetic process;GO:0044267//cellular protein metabolic process;GO:0010467//gene expression;GO:0019538//protein metabolic process;GO:0009059//macromolecule biosynthetic process;GO:0043170//macromolecule metabolic process;GO:0044260//cellular macromolecule m…	[C]cellular anatomical entity;intracellular;[P]metabolic process;cellular process;[F]structural molecule activity;	molecular_function;cellular_component;biological_process
isoform_106682
isoform_106718
isoform_106726
isoform_106752
isoform_106781	[P]GO:0009987//cellular process;GO:0044237//cellular metabolic process;GO:0019538//protein metabolic process;GO:0009765//photosynthesis, light harvesting;GO:0043412//macromolecule modification;GO:0008152//metabolic process;GO:0006807//nitrogen compound metabolic process;GO:0071704//organic substance metabolic process;GO:0018298//protein-chromophore linkage;GO:0044238//primary metabolic process;GO…	[C]intracellular;protein-containing complex;cellular anatomical entity;[P]cellular process;metabolic process;[F]binding;	cellular_component;molecular_function;biological_process
isoform_106796
isoform_106823
isoform_106836
isoform_106956	[C]GO:0016020//membrane;GO:0031224//intrinsic component of membrane;GO:0016021//integral component of membrane;GO:0110165//cellular anatomical entity;	[C]cellular anatomical entity;	cellular_component
isoform_106967	[P]GO:0042744//hydrogen peroxide catabolic process;GO:0009056//catabolic process;GO:0006950//response to stress;GO:0042743//hydrogen peroxide metabolic process;GO:0008152//metabolic process;GO:0050896//response to stimulus;GO:0044248//cellular catabolic process;GO:0044237//cellular metabolic process;GO:0009987//cellular process;GO:0006979//response to oxidative stress;GO:0072593//reactive oxygen …	[C]cellular anatomical entity;[P]cellular process;response to stimulus;metabolic process;[F]binding;antioxidant activity;catalytic activity;	biological_process;molecular_function;cellular_component
isoform_106970	[C]GO:0043231//intracellular membrane-bounded organelle;GO:0000786//nucleosome;GO:0005634//nucleus;GO:0044815//DNA packaging complex;GO:0005694//chromosome;GO:0043229//intracellular organelle;GO:0043226//organelle;GO:0000785//chromatin;GO:0043232//intracellular non-membrane-bounded organelle;GO:0043227//membrane-bounded organelle;GO:0005622//intracellular;GO:0110165//cellular anatomical entity;GO…	[C]protein-containing complex;cellular anatomical entity;intracellular;[F]binding;	molecular_function;cellular_component
isoform_107083	[P]GO:0019222//regulation of metabolic process;GO:0009987//cellular process;GO:0006740//NADPH regeneration;GO:0010109//regulation of photosynthesis;GO:0006091//generation of precursor metabolites and energy;GO:0006739//NADP metabolic process;GO:0050789//regulation of biological process;GO:0019684//photosynthesis, light reaction;GO:0015979//photosynthesis;GO:0009780//photosynthetic NADP+ reduction…	[C]protein-containing complex;intracellular;cellular anatomical entity;[P]biological regulation;cellular process;metabolic process;	biological_process;cellular_component
isoform_10714	[C]GO:0016021//integral component of membrane;GO:0031224//intrinsic component of membrane;GO:0016020//membrane;GO:0110165//cellular anatomical entity;[F]GO:0140096//catalytic activity, acting on a protein;GO:0016301//kinase activity;GO:1901363//heterocyclic compound binding;GO:0016740//transferase activity;GO:0004674//protein serine/threonine kinase activity;GO:0036094//small molecule binding;GO:…	[C]cellular anatomical entity;[F]catalytic activity;binding;	molecular_function;cellular_component
isoform_107164
isoform_10724
isoform_107275
isoform_107277
isoform_107304
isoform_107317
isoform_107318
isoform_107347	[P]GO:0033036//macromolecule localization;GO:0006869//lipid transport;GO:0071702//organic substance transport;GO:0006810//transport;GO:0051234//establishment of localization;GO:0051179//localization;GO:0010876//lipid localization;[F]GO:0008289//lipid binding;GO:0005488//binding;	[P]localization;[F]binding;	biological_process;molecular_function
isoform_107359	[P]GO:0008152//metabolic process;GO:0015979//photosynthesis;GO:0009987//cellular process;GO:0044237//cellular metabolic process;[C]GO:1902494//catalytic complex;GO:0009523//photosystem II;GO:0042651//thylakoid membrane;GO:0098796//membrane protein complex;GO:0034357//photosynthetic membrane;GO:1990204//oxidoreductase complex;GO:0032991//protein-containing complex;GO:0110165//cellular anatomical e…	[C]cellular anatomical entity;intracellular;protein-containing complex;[P]metabolic process;cellular process;[F]binding;	biological_process;molecular_function;cellular_component
isoform_107460	[P]GO:0071704//organic substance metabolic process;GO:0036211//protein modification process;GO:0043170//macromolecule metabolic process;GO:0043412//macromolecule modification;GO:1901564//organonitrogen compound metabolic process;GO:0018298//protein-chromophore linkage;GO:0044238//primary metabolic process;GO:0019684//photosynthesis, light reaction;GO:0008152//metabolic process;GO:0044237//cellula…	[C]protein-containing complex;cellular anatomical entity;intracellular;[P]cellular process;metabolic process;[F]binding;	biological_process;molecular_function;cellular_component
isoform_107485
isoform_107599
isoform_107653	[P]GO:2000113//negative regulation of cellular macromolecule biosynthetic process;GO:0045814//negative regulation of gene expression, epigenetic;GO:0051171//regulation of nitrogen compound metabolic process;GO:0009890//negative regulation of biosynthetic process;GO:1903507//negative regulation of nucleic acid-templated transcription;GO:0016043//cellular component organization;GO:0010605//negative…	[C]protein-containing complex;cellular anatomical entity;intracellular;[P]biological regulation;cellular process;[F]binding;	cellular_component;biological_process;molecular_function
isoform_107663	[P]GO:0048523//negative regulation of cellular process;GO:0010605//negative regulation of macromolecule metabolic process;GO:0016458//gene silencing;GO:0040029//regulation of gene expression, epigenetic;GO:0050789//regulation of biological process;GO:0080090//regulation of primary metabolic process;GO:0051276//chromosome organization;GO:0065007//biological regulation;GO:0060255//regulation of mac…	[C]intracellular;protein-containing complex;cellular anatomical entity;[P]biological regulation;cellular process;[F]binding;	cellular_component;molecular_function;biological_process
isoform_107666	[P]GO:0000003//reproduction;GO:0048856//anatomical structure development;GO:0048608//reproductive structure development;GO:0009791//post-embryonic development;GO:0048316//seed development;GO:0048731//system development;GO:0009793//embryo development ending in seed dormancy;GO:0032501//multicellular organismal process;GO:0061458//reproductive system development;GO:0003006//developmental process in…	[P]reproductive process;multicellular organismal process;developmental process;reproduction;	biological_process
isoform_10768
isoform_107726
isoform_107751
isoform_107766
isoform_107837	[P]GO:0019219//regulation of nucleobase-containing compound metabolic process;GO:0080090//regulation of primary metabolic process;GO:0045814//negative regulation of gene expression, epigenetic;GO:0006325//chromatin organization;GO:0009892//negative regulation of metabolic process;GO:0097549//chromatin organization involved in negative regulation of transcription;GO:0050789//regulation of biologic…	[C]cellular anatomical entity;protein-containing complex;intracellular;[P]biological regulation;cellular process;[F]binding;	molecular_function;biological_process;cellular_component
isoform_107882
isoform_10790	[P]GO:0006082//organic acid metabolic process;GO:0009987//cellular process;GO:0006090//pyruvate metabolic process;GO:0071704//organic substance metabolic process;GO:0043648//dicarboxylic acid metabolic process;GO:0044281//small molecule metabolic process;GO:0043436//oxoacid metabolic process;GO:0019752//carboxylic acid metabolic process;GO:0006108//malate metabolic process;GO:0044237//cellular me…	[C]intracellular;cellular anatomical entity;[P]metabolic process;cellular process;[F]binding;catalytic activity;	molecular_function;biological_process;cellular_component
isoform_107919	[C]GO:0031224//intrinsic component of membrane;GO:0110165//cellular anatomical entity;GO:0016021//integral component of membrane;GO:0016020//membrane;	[C]cellular anatomical entity;	cellular_component
isoform_107927	[P]GO:0009605//response to external stimulus;GO:0006952//defense response;GO:0098542//defense response to other organism;GO:0009627//systemic acquired resistance;GO:0045087//innate immune response;GO:0002376//immune system process;GO:0009814//defense response, incompatible interaction;GO:0051707//response to other organism;GO:0009607//response to biotic stimulus;GO:0050896//response to stimulus;G…	[C]cellular anatomical entity;[P]interspecies interaction between organisms;immune system process;response to stimulus;[F]binding;	molecular_function;biological_process;cellular_component
isoform_107949	[P]GO:0044237//cellular metabolic process;GO:0009987//cellular process;GO:0009767//photosynthetic electron transport chain;GO:0006091//generation of precursor metabolites and energy;GO:0008152//metabolic process;GO:0022900//electron transport chain;GO:0019684//photosynthesis, light reaction;GO:0015979//photosynthesis;GO:0055114//oxidation-reduction process;[C]GO:0009507//chloroplast;GO:0009536//p…	[C]protein-containing complex;cellular anatomical entity;intracellular;[P]metabolic process;cellular process;	biological_process;cellular_component
isoform_107957	[C]GO:0110165//cellular anatomical entity;GO:0031224//intrinsic component of membrane;GO:0016020//membrane;GO:0016021//integral component of membrane;	[C]cellular anatomical entity;	cellular_component
isoform_10798
isoform_107986	[P]GO:0008152//metabolic process;GO:0044237//cellular metabolic process;GO:0015979//photosynthesis;GO:0009987//cellular process;[C]GO:0009523//photosystem II;GO:0042651//thylakoid membrane;GO:0016020//membrane;GO:0043229//intracellular organelle;GO:0043227//membrane-bounded organelle;GO:0009521//photosystem;GO:0016021//integral component of membrane;GO:0043231//intracellular membrane-bounded orga…	[C]cellular anatomical entity;protein-containing complex;intracellular;[P]metabolic process;cellular process;[F]binding;	molecular_function;cellular_component;biological_process
isoform_108041	[P]GO:0043603//cellular amide metabolic process;GO:0006518//peptide metabolic process;GO:0044267//cellular protein metabolic process;GO:0008152//metabolic process;GO:0044238//primary metabolic process;GO:0043043//peptide biosynthetic process;GO:0044249//cellular biosynthetic process;GO:0006412//translation;GO:0044271//cellular nitrogen compound biosynthetic process;GO:0043604//amide biosynthetic …	[C]intracellular;cellular anatomical entity;[P]metabolic process;cellular process;[F]structural molecule activity;	molecular_function;biological_process;cellular_component
isoform_10806	[C]GO:0031224//intrinsic component of membrane;GO:0016020//membrane;GO:0016021//integral component of membrane;GO:0110165//cellular anatomical entity;	[C]cellular anatomical entity;	cellular_component
isoform_108077
isoform_108145
isoform_108169	[C]GO:0031224//intrinsic component of membrane;GO:0110165//cellular anatomical entity;GO:0016020//membrane;GO:0016021//integral component of membrane;	[C]cellular anatomical entity;	cellular_component
isoform_108172
isoform_108199
isoform_108202
isoform_108211	[C]GO:0016021//integral component of membrane;GO:0031224//intrinsic component of membrane;GO:0110165//cellular anatomical entity;GO:0016020//membrane;	[C]cellular anatomical entity;	cellular_component
isoform_108299
isoform_1083	[C]GO:0016020//membrane;GO:0016021//integral component of membrane;GO:0031224//intrinsic component of membrane;GO:0110165//cellular anatomical entity;	[C]cellular anatomical entity;	cellular_component
isoform_108306
isoform_108354	[P]GO:0051179//localization;GO:0055085//transmembrane transport;GO:0006810//transport;GO:0009987//cellular process;GO:0051234//establishment of localization;GO:0034220//ion transmembrane transport;GO:0006811//ion transport;[C]GO:0043227//membrane-bounded organelle;GO:0019867//outer membrane;GO:0009707//chloroplast outer membrane;GO:0031967//organelle envelope;GO:0031975//envelope;GO:0031969//chlo…	[C]intracellular;cellular anatomical entity;[P]cellular process;localization;[F]transporter activity;	cellular_component;molecular_function;biological_process
isoform_108364
isoform_108377
isoform_10839	[P]GO:0044249//cellular biosynthetic process;GO:0034637//cellular carbohydrate biosynthetic process;GO:0015980//energy derivation by oxidation of organic compounds;GO:0044264//cellular polysaccharide metabolic process;GO:0009058//biosynthetic process;GO:0005977//glycogen metabolic process;GO:0044238//primary metabolic process;GO:0006091//generation of precursor metabolites and energy;GO:0044042//…	[C]cellular anatomical entity;intracellular;[P]metabolic process;cellular process;[F]binding;catalytic activity;	cellular_component;biological_process;molecular_function
isoform_10841	[C]GO:0016021//integral component of membrane;GO:0016020//membrane;GO:0110165//cellular anatomical entity;GO:0031224//intrinsic component of membrane;[F]GO:0030247//polysaccharide binding;GO:0030246//carbohydrate binding;GO:2001070//starch binding;GO:0005488//binding;	[C]cellular anatomical entity;[F]binding;	molecular_function;cellular_component
isoform_108429
isoform_108431	[P]GO:0051205//protein insertion into membrane;GO:0070585//protein localization to mitochondrion;GO:0006996//organelle organization;GO:0006886//intracellular protein transport;GO:0051234//establishment of localization;GO:0070727//cellular macromolecule localization;GO:0072657//protein localization to membrane;GO:0071840//cellular component organization or biogenesis;GO:0033036//macromolecule loca…	[C]intracellular;protein-containing complex;cellular anatomical entity;[P]cellular process;localization;[F]binding;	biological_process;molecular_function;cellular_component
isoform_108436	[P]GO:0006333//chromatin assembly or disassembly;GO:0022607//cellular component assembly;GO:0071840//cellular component organization or biogenesis;GO:0006323//DNA packaging;GO:0051276//chromosome organization;GO:0031497//chromatin assembly;GO:0006334//nucleosome assembly;GO:0065003//protein-containing complex assembly;GO:0044085//cellular component biogenesis;GO:0016043//cellular component organi…	[C]protein-containing complex;cellular anatomical entity;intracellular;[P]cellular process;[F]binding;	cellular_component;biological_process;molecular_function
isoform_108437
isoform_108454
isoform_108478	[P]GO:0034645//cellular macromolecule biosynthetic process;GO:0006412//translation;GO:0044238//primary metabolic process;GO:0044249//cellular biosynthetic process;GO:1901576//organic substance biosynthetic process;GO:0009987//cellular process;GO:0044260//cellular macromolecule metabolic process;GO:0034641//cellular nitrogen compound metabolic process;GO:0044271//cellular nitrogen compound biosynt…	[C]cellular anatomical entity;intracellular;[P]metabolic process;cellular process;[F]structural molecule activity;	molecular_function;biological_process;cellular_component
isoform_108578	[C]GO:0016021//integral component of membrane;GO:0016020//membrane;GO:0110165//cellular anatomical entity;GO:0031224//intrinsic component of membrane;	[C]cellular anatomical entity;	cellular_component
isoform_108592	[C]GO:0031224//intrinsic component of membrane;GO:0110165//cellular anatomical entity;GO:0016020//membrane;GO:0016021//integral component of membrane;[F]GO:0046914//transition metal ion binding;GO:0004497//monooxygenase activity;GO:0005488//binding;GO:1901363//heterocyclic compound binding;GO:0005506//iron ion binding;GO:0097159//organic cyclic compound binding;GO:0016705//oxidoreductase activity…	[C]cellular anatomical entity;[F]binding;catalytic activity;	cellular_component;molecular_function
isoform_108603
isoform_10861	[P]GO:0071704//organic substance metabolic process;GO:0008152//metabolic process;GO:0009058//biosynthetic process;GO:0008610//lipid biosynthetic process;GO:0006629//lipid metabolic process;GO:1901576//organic substance biosynthetic process;GO:0044238//primary metabolic process;[C]GO:0110165//cellular anatomical entity;GO:0031224//intrinsic component of membrane;GO:0016021//integral component of m…	[C]cellular anatomical entity;[P]metabolic process;[F]binding;catalytic activity;	molecular_function;cellular_component;biological_process
isoform_108639
isoform_108648	[P]GO:0044238//primary metabolic process;GO:0071704//organic substance metabolic process;GO:0044237//cellular metabolic process;GO:0009059//macromolecule biosynthetic process;GO:0043043//peptide biosynthetic process;GO:0034641//cellular nitrogen compound metabolic process;GO:0006412//translation;GO:0009058//biosynthetic process;GO:0034645//cellular macromolecule biosynthetic process;GO:1901566//o…	[C]intracellular;cellular anatomical entity;protein-containing complex;[P]cellular process;metabolic process;[F]structural molecule activity;	cellular_component;biological_process;molecular_function
isoform_108652
isoform_108704	[P]GO:0009987//cellular process;GO:0044237//cellular metabolic process;GO:0008152//metabolic process;GO:0015979//photosynthesis;[C]GO:1902494//catalytic complex;GO:0034357//photosynthetic membrane;GO:0042651//thylakoid membrane;GO:0009654//photosystem II oxygen evolving complex;GO:0016020//membrane;GO:0005622//intracellular;GO:1990204//oxidoreductase complex;GO:0009521//photosystem;GO:0009579//th…	[C]intracellular;cellular anatomical entity;protein-containing complex;[P]metabolic process;cellular process;	biological_process;cellular_component
isoform_10884	[P]GO:0035999//tetrahydrofolate interconversion;GO:0006545//glycine biosynthetic process;GO:0044249//cellular biosynthetic process;GO:0046653//tetrahydrofolate metabolic process;GO:0008152//metabolic process;GO:0006520//cellular amino acid metabolic process;GO:0019264//glycine biosynthetic process from serine;GO:0009069//serine family amino acid metabolic process;GO:0034641//cellular nitrogen com…	[P]metabolic process;cellular process;[F]catalytic activity;binding;	molecular_function;biological_process
isoform_108875
isoform_108876
isoform_108933	[P]GO:0043467//regulation of generation of precursor metabolites and energy;GO:0065007//biological regulation;GO:0031323//regulation of cellular metabolic process;GO:0015979//photosynthesis;GO:0042549//photosystem II stabilization;GO:0019222//regulation of metabolic process;GO:0042548//regulation of photosynthesis, light reaction;GO:0010109//regulation of photosynthesis;GO:0008152//metabolic proc…	[C]cellular anatomical entity;protein-containing complex;intracellular;[P]cellular process;biological regulation;metabolic process;	cellular_component;biological_process
isoform_108947	[P]GO:0071705//nitrogen compound transport;GO:0043248//proteasome assembly;GO:0006259//DNA metabolic process;GO:0033554//cellular response to stress;GO:0006725//cellular aromatic compound metabolic process;GO:0006611//protein export from nucleus;GO:0050658//RNA transport;GO:0006403//RNA localization;GO:0071427//mRNA-containing ribonucleoprotein complex export from nucleus;GO:0006950//response to …	[C]intracellular;protein-containing complex;[P]cellular process;response to stimulus;metabolic process;localization;	cellular_component;biological_process
isoform_108993
isoform_109001	[P]GO:0044237//cellular metabolic process;GO:0044248//cellular catabolic process;GO:0008152//metabolic process;GO:0061919//process utilizing autophagic mechanism;GO:0009987//cellular process;GO:0009056//catabolic process;GO:0006914//autophagy;[C]GO:0110165//cellular anatomical entity;GO:0005737//cytoplasm;GO:0005622//intracellular;	[C]intracellular;cellular anatomical entity;[P]metabolic process;cellular process;	biological_process;cellular_component
isoform_109004
isoform_109102
isoform_10914	[P]GO:1901575//organic substance catabolic process;GO:0005976//polysaccharide metabolic process;GO:0009056//catabolic process;GO:0045229//external encapsulating structure organization;GO:0043170//macromolecule metabolic process;GO:0071554//cell wall organization or biogenesis;GO:0009987//cellular process;GO:0044238//primary metabolic process;GO:0071704//organic substance metabolic process;GO:0045…	[C]cellular anatomical entity;[P]metabolic process;cellular process;[F]molecular function regulator;catalytic activity;	molecular_function;biological_process;cellular_component
isoform_10915
isoform_109155	[C]GO:0032991//protein-containing complex;GO:0043232//intracellular non-membrane-bounded organelle;GO:0005634//nucleus;GO:0032993//protein-DNA complex;GO:0043226//organelle;GO:0043228//non-membrane-bounded organelle;GO:0043229//intracellular organelle;GO:0044815//DNA packaging complex;GO:0043227//membrane-bounded organelle;GO:0005694//chromosome;GO:0110165//cellular anatomical entity;GO:0005622//…	[C]intracellular;protein-containing complex;cellular anatomical entity;[F]binding;	cellular_component;molecular_function
isoform_109163
isoform_109167
isoform_10923
isoform_109271
isoform_109298
isoform_109374
isoform_109382
isoform_109392	[P]GO:0044267//cellular protein metabolic process;GO:0071704//organic substance metabolic process;GO:1901564//organonitrogen compound metabolic process;GO:0043412//macromolecule modification;GO:0044260//cellular macromolecule metabolic process;GO:0018298//protein-chromophore linkage;GO:0006464//cellular protein modification process;GO:0015979//photosynthesis;GO:0009987//cellular process;GO:004317…	[C]intracellular;cellular anatomical entity;protein-containing complex;[P]cellular process;metabolic process;[F]binding;	biological_process;molecular_function;cellular_component
isoform_109418
isoform_109421
isoform_109441
isoform_109470
isoform_109508
isoform_109571	[P]GO:0006091//generation of precursor metabolites and energy;GO:0009767//photosynthetic electron transport chain;GO:0015979//photosynthesis;GO:0055114//oxidation-reduction process;GO:0008152//metabolic process;GO:0019684//photosynthesis, light reaction;GO:0022900//electron transport chain;GO:0044237//cellular metabolic process;GO:0009987//cellular process;[C]GO:0043227//membrane-bounded organell…	[C]protein-containing complex;cellular anatomical entity;intracellular;[P]cellular process;metabolic process;[F]translation regulator activity;binding;catalytic activity;	cellular_component;molecular_function;biological_process
isoform_109592
isoform_109604
isoform_109609
isoform_109624	[P]GO:0023052//signaling;GO:0009987//cellular process;GO:0065007//biological regulation;GO:0007154//cell communication;GO:0019932//second-messenger-mediated signaling;GO:0035556//intracellular signal transduction;GO:0050794//regulation of cellular process;GO:0050896//response to stimulus;GO:0019722//calcium-mediated signaling;GO:0050789//regulation of biological process;GO:0007165//signal transdu…	[C]cellular anatomical entity;[P]biological regulation;cellular process;signaling;response to stimulus;	biological_process;cellular_component
isoform_109670	[P]GO:0065009//regulation of molecular function;GO:0044093//positive regulation of molecular function;GO:2000582//positive regulation of ATP-dependent microtubule motor activity, plus-end-directed;GO:0043085//positive regulation of catalytic activity;GO:0051345//positive regulation of hydrolase activity;GO:2000574//regulation of microtubule motor activity;GO:0043462//regulation of ATPase activity…	[C]cellular anatomical entity;intracellular;protein-containing complex;[P]cellular process;biological regulation;[F]catalytic activity;binding;	biological_process;cellular_component;molecular_function
isoform_109703
isoform_109761
isoform_10978	[F]GO:0003824//catalytic activity;GO:0016491//oxidoreductase activity;	[F]catalytic activity;	molecular_function
isoform_10981	[P]GO:0005984//disaccharide metabolic process;GO:0044248//cellular catabolic process;GO:0005987//sucrose catabolic process;GO:0009313//oligosaccharide catabolic process;GO:0044262//cellular carbohydrate metabolic process;GO:0005975//carbohydrate metabolic process;GO:0016052//carbohydrate catabolic process;GO:0009987//cellular process;GO:0044237//cellular metabolic process;GO:0071704//organic subs…	[C]intracellular;cellular anatomical entity;[P]cellular process;metabolic process;[F]catalytic activity;	cellular_component;biological_process;molecular_function
isoform_109819	[P]GO:0071704//organic substance metabolic process;GO:0009987//cellular process;GO:0006725//cellular aromatic compound metabolic process;GO:0008152//metabolic process;GO:0043170//macromolecule metabolic process;GO:0034641//cellular nitrogen compound metabolic process;GO:1901360//organic cyclic compound metabolic process;GO:0000380//alternative mRNA splicing, via spliceosome;GO:0006397//mRNA proce…	[C]cellular anatomical entity;[P]metabolic process;cellular process;	biological_process;cellular_component
isoform_109881	[P]GO:0071554//cell wall organization or biogenesis;GO:0071555//cell wall organization;GO:0071669//plant-type cell wall organization or biogenesis;GO:0016043//cellular component organization;GO:0009987//cellular process;GO:0009664//plant-type cell wall organization;GO:0071840//cellular component organization or biogenesis;GO:0045229//external encapsulating structure organization;[C]GO:0030312//ex…	[C]cellular anatomical entity;[P]cellular process;	cellular_component;biological_process
isoform_109894
isoform_10991	[F]GO:0004721//phosphoprotein phosphatase activity;GO:0016791//phosphatase activity;GO:0016788//hydrolase activity, acting on ester bonds;GO:0004722//protein serine/threonine phosphatase activity;GO:0003824//catalytic activity;GO:0140096//catalytic activity, acting on a protein;GO:0042578//phosphoric ester hydrolase activity;GO:0016787//hydrolase activity;	[F]catalytic activity;	molecular_function
isoform_109976
isoform_110001
isoform_110094
isoform_110095
isoform_110115
isoform_110134
isoform_110173	[C]GO:0044815//DNA packaging complex;GO:0043231//intracellular membrane-bounded organelle;GO:0043228//non-membrane-bounded organelle;GO:0005622//intracellular;GO:0005634//nucleus;GO:0043232//intracellular non-membrane-bounded organelle;GO:0000785//chromatin;GO:0043229//intracellular organelle;GO:0043226//organelle;GO:0000786//nucleosome;GO:0005694//chromosome;GO:0032993//protein-DNA complex;GO:01…	[C]intracellular;protein-containing complex;cellular anatomical entity;[F]binding;	cellular_component;molecular_function
isoform_110188
isoform_110223
isoform_110253
isoform_110273
isoform_110323
isoform_11040	[P]GO:0016052//carbohydrate catabolic process;GO:0009311//oligosaccharide metabolic process;GO:0008152//metabolic process;GO:0005984//disaccharide metabolic process;GO:0046352//disaccharide catabolic process;GO:0071704//organic substance metabolic process;GO:0005985//sucrose metabolic process;GO:0009056//catabolic process;GO:0044262//cellular carbohydrate metabolic process;GO:1901575//organic sub…	[C]intracellular;cellular anatomical entity;[P]metabolic process;cellular process;[F]catalytic activity;	biological_process;cellular_component;molecular_function
isoform_110426	[F]GO:0005488//binding;GO:0003723//RNA binding;GO:0003676//nucleic acid binding;GO:1901363//heterocyclic compound binding;GO:0097159//organic cyclic compound binding;	[F]binding;	molecular_function
isoform_110457
isoform_110459
isoform_110514	[C]GO:0016020//membrane;GO:0031224//intrinsic component of membrane;GO:0016021//integral component of membrane;GO:0110165//cellular anatomical entity;	[C]cellular anatomical entity;	cellular_component
isoform_110524
isoform_110550
isoform_110580
isoform_110606
isoform_110661	[P]GO:0051179//localization;GO:0006886//intracellular protein transport;GO:0034613//cellular protein localization;GO:0009987//cellular process;GO:0006810//transport;GO:0015833//peptide transport;GO:0042886//amide transport;GO:0071840//cellular component organization or biogenesis;GO:0070727//cellular macromolecule localization;GO:0051649//establishment of localization in cell;GO:0033036//macromol…	[C]intracellular;protein-containing complex;cellular anatomical entity;[P]cellular process;localization;	biological_process;cellular_component
isoform_110662	[P]GO:0009642//response to light intensity;GO:0009643//photosynthetic acclimation;GO:0055114//oxidation-reduction process;GO:0008152//metabolic process;GO:0015979//photosynthesis;GO:0009314//response to radiation;GO:0044237//cellular metabolic process;GO:0009987//cellular process;GO:0019684//photosynthesis, light reaction;GO:0009628//response to abiotic stimulus;GO:0050896//response to stimulus;G…	[C]intracellular;cellular anatomical entity;[P]cellular process;metabolic process;response to stimulus;[F]catalytic activity;binding;	cellular_component;molecular_function;biological_process
isoform_110681
isoform_110762	[P]GO:0008152//metabolic process;GO:0015979//photosynthesis;GO:0044237//cellular metabolic process;GO:0009987//cellular process;[C]GO:0009579//thylakoid;GO:0110165//cellular anatomical entity;GO:0005622//intracellular;GO:0098796//membrane protein complex;GO:0009522//photosystem I;GO:0009521//photosystem;GO:0016020//membrane;GO:0034357//photosynthetic membrane;GO:0032991//protein-containing comple…	[C]intracellular;protein-containing complex;cellular anatomical entity;[P]metabolic process;cellular process;	cellular_component;biological_process
isoform_110766	[F]GO:0008233//peptidase activity;GO:0140096//catalytic activity, acting on a protein;GO:0003824//catalytic activity;GO:0016787//hydrolase activity;	[F]catalytic activity;	molecular_function
isoform_110777	[C]GO:0005737//cytoplasm;GO:0009536//plastid;GO:0043227//membrane-bounded organelle;GO:0043226//organelle;GO:0110165//cellular anatomical entity;GO:0043229//intracellular organelle;GO:0043231//intracellular membrane-bounded organelle;GO:0009507//chloroplast;GO:0005622//intracellular;	[C]intracellular;cellular anatomical entity;	cellular_component
isoform_110855	[P]GO:1904031//positive regulation of cyclin-dependent protein kinase activity;GO:0001932//regulation of protein phosphorylation;GO:0010604//positive regulation of macromolecule metabolic process;GO:0051247//positive regulation of protein metabolic process;GO:0071902//positive regulation of protein serine/threonine kinase activity;GO:0045737//positive regulation of cyclin-dependent protein serine…	[C]intracellular;protein-containing complex;[P]biological regulation;cellular process;[F]binding;catalytic activity;molecular function regulator;	molecular_function;biological_process;cellular_component
isoform_110865
isoform_110899
isoform_110930	[P]GO:0051234//establishment of localization;GO:0006811//ion transport;GO:0051179//localization;GO:0006812//cation transport;GO:0006810//transport;GO:0030001//metal ion transport;[F]GO:0005488//binding;GO:0046872//metal ion binding;GO:0043169//cation binding;GO:0043167//ion binding;	[P]localization;[F]binding;	molecular_function;biological_process
isoform_110938
isoform_110943	[C]GO:0016020//membrane;GO:0110165//cellular anatomical entity;GO:0031224//intrinsic component of membrane;GO:0016021//integral component of membrane;[F]GO:1901505//carbohydrate derivative transmembrane transporter activity;GO:0005337//nucleoside transmembrane transporter activity;GO:0015932//nucleobase-containing compound transmembrane transporter activity;GO:0005215//transporter activity;GO:002…	[C]cellular anatomical entity;[F]transporter activity;	cellular_component;molecular_function
isoform_110999	[C]GO:0070069//cytochrome complex;GO:0009512//cytochrome b6f complex;GO:0016021//integral component of membrane;GO:0009579//thylakoid;GO:0031224//intrinsic component of membrane;GO:0005622//intracellular;GO:0110165//cellular anatomical entity;GO:0016020//membrane;GO:0032991//protein-containing complex;	[C]cellular anatomical entity;intracellular;protein-containing complex;	cellular_component
isoform_111017
isoform_111018	[F]GO:0003723//RNA binding;GO:0005488//binding;GO:0097159//organic cyclic compound binding;GO:1901363//heterocyclic compound binding;GO:0003676//nucleic acid binding;	[F]binding;	molecular_function
isoform_111043
isoform_111047	[P]GO:0017148//negative regulation of translation;GO:0051172//negative regulation of nitrogen compound metabolic process;GO:0009987//cellular process;GO:0051248//negative regulation of protein metabolic process;GO:0031323//regulation of cellular metabolic process;GO:0034248//regulation of cellular amide metabolic process;GO:0010468//regulation of gene expression;GO:0051246//regulation of protein …	[C]intracellular;cellular anatomical entity;[P]biological regulation;cellular process;response to stimulus;	biological_process;cellular_component
isoform_111115
isoform_111126	[P]GO:0015979//photosynthesis;GO:0008152//metabolic process;GO:0044237//cellular metabolic process;GO:0009987//cellular process;[C]GO:0009521//photosystem;GO:0031984//organelle subcompartment;GO:0042651//thylakoid membrane;GO:0005737//cytoplasm;GO:0055035//plastid thylakoid membrane;GO:0098796//membrane protein complex;GO:0016020//membrane;GO:0009536//plastid;GO:0009523//photosystem II;GO:0009535…	[C]intracellular;cellular anatomical entity;protein-containing complex;[P]metabolic process;cellular process;[F]binding;	cellular_component;molecular_function;biological_process
isoform_111163	[P]GO:0009266//response to temperature stimulus;GO:0009628//response to abiotic stimulus;GO:0050896//response to stimulus;GO:0006950//response to stress;GO:0009409//response to cold;[C]GO:0005576//extracellular region;GO:0031967//organelle envelope;GO:0009532//plastid stroma;GO:0005737//cytoplasm;GO:0043226//organelle;GO:0009941//chloroplast envelope;GO:0009579//thylakoid;GO:0005622//intracellula…	[C]cellular anatomical entity;intracellular;[P]response to stimulus;[F]binding;catalytic activity;	biological_process;cellular_component;molecular_function
isoform_11121	[P]GO:0044238//primary metabolic process;GO:0006629//lipid metabolic process;GO:0009058//biosynthetic process;GO:0019752//carboxylic acid metabolic process;GO:0046394//carboxylic acid biosynthetic process;GO:0072330//monocarboxylic acid biosynthetic process;GO:0044281//small molecule metabolic process;GO:0008152//metabolic process;GO:0008610//lipid biosynthetic process;GO:0044237//cellular metabo…	[C]cellular anatomical entity;[P]cellular process;metabolic process;[F]catalytic activity;	molecular_function;biological_process;cellular_component
isoform_11122	[F]GO:0003824//catalytic activity;GO:0046872//metal ion binding;GO:0043169//cation binding;GO:0005488//binding;GO:0016788//hydrolase activity, acting on ester bonds;GO:0016791//phosphatase activity;GO:0042578//phosphoric ester hydrolase activity;GO:0016787//hydrolase activity;GO:0043167//ion binding;GO:0003993//acid phosphatase activity;	[F]binding;catalytic activity;	molecular_function
isoform_111220	[C]GO:0016020//membrane;GO:0016021//integral component of membrane;GO:0110165//cellular anatomical entity;GO:0031224//intrinsic component of membrane;[F]GO:1901505//carbohydrate derivative transmembrane transporter activity;GO:0005215//transporter activity;GO:0022857//transmembrane transporter activity;GO:0015932//nucleobase-containing compound transmembrane transporter activity;GO:0005337//nucle…	[C]cellular anatomical entity;[F]transporter activity;	cellular_component;molecular_function
isoform_111274
isoform_111326
isoform_111333
isoform_111357	[P]GO:0019637//organophosphate metabolic process;GO:0006793//phosphorus metabolic process;GO:0015711//organic anion transport;GO:0006644//phospholipid metabolic process;GO:0050482//arachidonic acid secretion;GO:0044238//primary metabolic process;GO:1903963//arachidonate transport;GO:0015908//fatty acid transport;GO:0071702//organic substance transport;GO:0071715//icosanoid transport;GO:0016042//l…	[C]cellular anatomical entity;intracellular;[P]cellular process;localization;metabolic process;[F]binding;catalytic activity;	molecular_function;cellular_component;biological_process
isoform_11143	[C]GO:0031224//intrinsic component of membrane;GO:0016020//membrane;GO:0016021//integral component of membrane;GO:0110165//cellular anatomical entity;	[C]cellular anatomical entity;	cellular_component
isoform_111439	[P]GO:0008152//metabolic process;GO:0009987//cellular process;GO:0015979//photosynthesis;GO:0044237//cellular metabolic process;[C]GO:0009521//photosystem;GO:0009538//photosystem I reaction center;GO:0098796//membrane protein complex;GO:0032991//protein-containing complex;GO:0009579//thylakoid;GO:0034357//photosynthetic membrane;GO:0009522//photosystem I;GO:0110165//cellular anatomical entity;GO:…	[C]cellular anatomical entity;protein-containing complex;intracellular;[P]metabolic process;cellular process;	biological_process;cellular_component
isoform_11145
isoform_111543
isoform_111575
isoform_111625
isoform_111664
isoform_111715
isoform_111745
isoform_111787
isoform_111804
isoform_111811	[P]GO:0042548//regulation of photosynthesis, light reaction;GO:0006091//generation of precursor metabolites and energy;GO:0042550//photosystem I stabilization;GO:0009780//photosynthetic NADP+ reduction;GO:0065007//biological regulation;GO:0050821//protein stabilization;GO:0044237//cellular metabolic process;GO:0009767//photosynthetic electron transport chain;GO:0050794//regulation of cellular pro…	[C]intracellular;cellular anatomical entity;protein-containing complex;[P]metabolic process;cellular process;biological regulation;	biological_process;cellular_component
isoform_111848
isoform_111863
isoform_111864
isoform_1119	[C]GO:0016021//integral component of membrane;GO:0110165//cellular anatomical entity;GO:0016020//membrane;GO:0031224//intrinsic component of membrane;	[C]cellular anatomical entity;	cellular_component
isoform_111905
isoform_112002
isoform_112028
isoform_112034
isoform_112037
isoform_112065
isoform_112066
isoform_112069
isoform_112092
isoform_112196	[F]GO:0016787//hydrolase activity;GO:0003824//catalytic activity;	[F]catalytic activity;	molecular_function
isoform_112198	[C]GO:0031224//intrinsic component of membrane;GO:0110165//cellular anatomical entity;GO:0016021//integral component of membrane;GO:0016020//membrane;	[C]cellular anatomical entity;	cellular_component
isoform_112200
isoform_112205
isoform_112218	[C]GO:0031224//intrinsic component of membrane;GO:0110165//cellular anatomical entity;GO:0016020//membrane;GO:0016021//integral component of membrane;	[C]cellular anatomical entity;	cellular_component
isoform_112263
isoform_112272
isoform_112291	[C]GO:0032993//protein-DNA complex;GO:0005634//nucleus;GO:0044815//DNA packaging complex;GO:0043231//intracellular membrane-bounded organelle;GO:0110165//cellular anatomical entity;GO:0005694//chromosome;GO:0043232//intracellular non-membrane-bounded organelle;GO:0005622//intracellular;GO:0000786//nucleosome;GO:0000785//chromatin;GO:0032991//protein-containing complex;GO:0043227//membrane-bounded…	[C]intracellular;protein-containing complex;cellular anatomical entity;[F]binding;	cellular_component;molecular_function
isoform_112307	[C]GO:0005576//extracellular region;GO:0110165//cellular anatomical entity;[F]GO:0008233//peptidase activity;GO:0016787//hydrolase activity;GO:0140096//catalytic activity, acting on a protein;GO:0003824//catalytic activity;GO:0008234//cysteine-type peptidase activity;GO:0070011//peptidase activity, acting on L-amino acid peptides;	[C]cellular anatomical entity;[F]catalytic activity;	molecular_function;cellular_component
isoform_112371	[P]GO:0006353//DNA-templated transcription, termination;GO:0006397//mRNA processing;GO:0006366//transcription by RNA polymerase II;GO:0006807//nitrogen compound metabolic process;GO:0018130//heterocycle biosynthetic process;GO:0043170//macromolecule metabolic process;GO:0044237//cellular metabolic process;GO:0010467//gene expression;GO:0044271//cellular nitrogen compound biosynthetic process;GO:0…	[C]cellular anatomical entity;protein-containing complex;intracellular;[P]cellular process;metabolic process;[F]binding;	biological_process;molecular_function;cellular_component
isoform_1124
isoform_112476	[C]GO:0110165//cellular anatomical entity;GO:0071944//cell periphery;GO:0005886//plasma membrane;GO:0031224//intrinsic component of membrane;GO:0016020//membrane;GO:0016021//integral component of membrane;	[C]cellular anatomical entity;	cellular_component
isoform_112486
isoform_112590
isoform_112639	[C]GO:0016020//membrane;GO:0110165//cellular anatomical entity;GO:0016021//integral component of membrane;GO:0031224//intrinsic component of membrane;[F]GO:0005375//copper ion transmembrane transporter activity;GO:0046873//metal ion transmembrane transporter activity;GO:0022857//transmembrane transporter activity;GO:0008324//cation transmembrane transporter activity;GO:0022890//inorganic cation t…	[C]cellular anatomical entity;[F]transporter activity;	cellular_component;molecular_function
isoform_1127	[P]GO:0009311//oligosaccharide metabolic process;GO:0071704//organic substance metabolic process;GO:0009987//cellular process;GO:0005984//disaccharide metabolic process;GO:0008152//metabolic process;GO:0044238//primary metabolic process;GO:0044237//cellular metabolic process;GO:0005975//carbohydrate metabolic process;GO:0044262//cellular carbohydrate metabolic process;GO:0005985//sucrose metaboli…	[P]metabolic process;cellular process;[F]catalytic activity;	biological_process;molecular_function
isoform_112747
isoform_112775
isoform_112837
isoform_112911
isoform_11292	[C]GO:0016020//membrane;GO:0110165//cellular anatomical entity;GO:0031224//intrinsic component of membrane;GO:0016021//integral component of membrane;[F]GO:0046914//transition metal ion binding;GO:0003824//catalytic activity;GO:0004497//monooxygenase activity;GO:0020037//heme binding;GO:0016705//oxidoreductase activity, acting on paired donors, with incorporation or reduction of molecular oxygen;…	[C]cellular anatomical entity;[F]catalytic activity;binding;	molecular_function;cellular_component
isoform_112945
isoform_112968
isoform_113106	[C]GO:0031224//intrinsic component of membrane;GO:0110165//cellular anatomical entity;GO:0016020//membrane;GO:0016021//integral component of membrane;	[C]cellular anatomical entity;	cellular_component
isoform_113130
isoform_113140
isoform_113147
isoform_113172	[C]GO:0110165//cellular anatomical entity;GO:0016021//integral component of membrane;GO:0016020//membrane;GO:0031224//intrinsic component of membrane;	[C]cellular anatomical entity;	cellular_component
isoform_11322	[P]GO:0031326//regulation of cellular biosynthetic process;GO:0001932//regulation of protein phosphorylation;GO:1901407//regulation of phosphorylation of RNA polymerase II C-terminal domain;GO:0006355//regulation of transcription, DNA-templated;GO:0019220//regulation of phosphate metabolic process;GO:0006357//regulation of transcription by RNA polymerase II;GO:2000112//regulation of cellular macr…	[C]cellular anatomical entity;intracellular;[P]biological regulation;[F]binding;catalytic activity;	cellular_component;molecular_function;biological_process
isoform_113220	[P]GO:0050896//response to stimulus;GO:0033993//response to lipid;GO:0071495//cellular response to endogenous stimulus;GO:0071396//cellular response to lipid;GO:0009737//response to abscisic acid;GO:0009719//response to endogenous stimulus;GO:0009738//abscisic acid-activated signaling pathway;GO:1901700//response to oxygen-containing compound;GO:1901701//cellular response to oxygen-containing com…	[P]response to stimulus;cellular process;signaling;biological regulation;[F]molecular function regulator;molecular transducer activity;binding;	biological_process;molecular_function
isoform_113296
isoform_113298
isoform_113311
isoform_113355	[C]GO:0031224//intrinsic component of membrane;GO:0016021//integral component of membrane;GO:0110165//cellular anatomical entity;GO:0016020//membrane;[F]GO:1901505//carbohydrate derivative transmembrane transporter activity;GO:0015932//nucleobase-containing compound transmembrane transporter activity;GO:0005215//transporter activity;GO:0005337//nucleoside transmembrane transporter activity;GO:002…	[C]cellular anatomical entity;[F]transporter activity;	molecular_function;cellular_component
isoform_113395
isoform_113402
isoform_113417
isoform_113422
isoform_113426	[C]GO:0031224//intrinsic component of membrane;GO:0110165//cellular anatomical entity;GO:0016021//integral component of membrane;GO:0016020//membrane;	[C]cellular anatomical entity;	cellular_component
isoform_11356	[C]GO:0110165//cellular anatomical entity;GO:0005737//cytoplasm;GO:0005622//intracellular;[F]GO:0017076//purine nucleotide binding;GO:0003824//catalytic activity;GO:0016772//transferase activity, transferring phosphorus-containing groups;GO:0140096//catalytic activity, acting on a protein;GO:0030554//adenyl nucleotide binding;GO:0016773//phosphotransferase activity, alcohol group as acceptor;GO:0…	[C]intracellular;cellular anatomical entity;[F]catalytic activity;binding;	cellular_component;molecular_function
isoform_113641
isoform_113787
isoform_113807
isoform_113884
isoform_113897	[C]GO:0016020//membrane;GO:0005747//mitochondrial respiratory chain complex I;GO:0031967//organelle envelope;GO:0045271//respiratory chain complex I;GO:0016021//integral component of membrane;GO:1990204//oxidoreductase complex;GO:0098800//inner mitochondrial membrane protein complex;GO:0005739//mitochondrion;GO:0098798//mitochondrial protein complex;GO:0031224//intrinsic component of membrane;GO:…	[C]intracellular;cellular anatomical entity;protein-containing complex;	cellular_component
isoform_11393
isoform_113941
isoform_113967
isoform_113968
isoform_114021
isoform_11403	[P]GO:1901360//organic cyclic compound metabolic process;GO:0008202//steroid metabolic process;GO:0044238//primary metabolic process;GO:0008152//metabolic process;GO:0071704//organic substance metabolic process;GO:0006629//lipid metabolic process;[C]GO:0016021//integral component of membrane;GO:0031224//intrinsic component of membrane;GO:0110165//cellular anatomical entity;GO:0005737//cytoplasm;G…	[C]cellular anatomical entity;intracellular;[P]metabolic process;[F]binding;catalytic activity;	molecular_function;cellular_component;biological_process
isoform_114055	[P]GO:0044237//cellular metabolic process;GO:0050794//regulation of cellular process;GO:0019222//regulation of metabolic process;GO:0043467//regulation of generation of precursor metabolites and energy;GO:0010109//regulation of photosynthesis;GO:0008152//metabolic process;GO:0065007//biological regulation;GO:0050789//regulation of biological process;GO:0031323//regulation of cellular metabolic pr…	[C]cellular anatomical entity;protein-containing complex;intracellular;[P]biological regulation;metabolic process;cellular process;	cellular_component;biological_process
isoform_11410	[P]GO:0065007//biological regulation;GO:0048878//chemical homeostasis;GO:0010252//auxin homeostasis;GO:0009725//response to hormone;GO:0065008//regulation of biological quality;GO:0010033//response to organic substance;GO:0050896//response to stimulus;GO:0009733//response to auxin;GO:0009719//response to endogenous stimulus;GO:0042592//homeostatic process;GO:0042221//response to chemical;[C]GO:00…	[C]intracellular;cellular anatomical entity;[P]biological regulation;response to stimulus;[F]catalytic activity;	molecular_function;biological_process;cellular_component
isoform_114109
isoform_114188	[C]GO:0031224//intrinsic component of membrane;GO:0016020//membrane;GO:0016021//integral component of membrane;GO:0110165//cellular anatomical entity;	[C]cellular anatomical entity;	cellular_component
isoform_11420	[C]GO:0016020//membrane;GO:0016021//integral component of membrane;GO:0110165//cellular anatomical entity;GO:0031224//intrinsic component of membrane;[F]GO:0032555//purine ribonucleotide binding;GO:1901265//nucleoside phosphate binding;GO:0035639//purine ribonucleoside triphosphate binding;GO:0036094//small molecule binding;GO:0004175//endopeptidase activity;GO:0000166//nucleotide binding;GO:0005…	[C]cellular anatomical entity;[F]catalytic activity;binding;	cellular_component;molecular_function
isoform_114245
isoform_114271
isoform_114354
isoform_114358
isoform_114377	[P]GO:0009405//pathogenesis;GO:0044419//interspecies interaction between organisms;[C]GO:0110165//cellular anatomical entity;GO:0005576//extracellular region;[F]GO:0016740//transferase activity;GO:0003824//catalytic activity;GO:0016763//transferase activity, transferring pentosyl groups;GO:0016757//transferase activity, transferring glycosyl groups;GO:0003950//NAD+ ADP-ribosyltransferase activity;	[C]cellular anatomical entity;[P]interspecies interaction between organisms;[F]catalytic activity;	molecular_function;biological_process;cellular_component
isoform_11441	[P]GO:0051234//establishment of localization;GO:0006857//oligopeptide transport;GO:0006810//transport;GO:0042886//amide transport;GO:0071705//nitrogen compound transport;GO:0071702//organic substance transport;GO:0015833//peptide transport;GO:0051179//localization;[C]GO:0031224//intrinsic component of membrane;GO:0016020//membrane;GO:0110165//cellular anatomical entity;GO:0016021//integral compon…	[C]cellular anatomical entity;[P]localization;[F]transporter activity;	molecular_function;biological_process;cellular_component
isoform_114560
isoform_114592
isoform_114594	[P]GO:0052331//hemolysis in other organism involved in symbiotic interaction;GO:0051883//killing of cells in other organism involved in symbiotic interaction;GO:0001906//cell killing;GO:0051801//cytolysis in other organism involved in symbiotic interaction;GO:0001897//cytolysis by symbiont of host cells;GO:0001907//killing by symbiont of host cells;GO:0044179//hemolysis in other organism;GO:00444…	[P]interspecies interaction between organisms;cellular process;	biological_process
isoform_114598	[C]GO:0005622//intracellular;GO:0110165//cellular anatomical entity;GO:0009507//chloroplast;GO:0043231//intracellular membrane-bounded organelle;GO:0043226//organelle;GO:0043227//membrane-bounded organelle;GO:0009536//plastid;GO:0005737//cytoplasm;GO:0043229//intracellular organelle;[F]GO:0005488//binding;GO:0043167//ion binding;GO:0009055//electron transfer activity;GO:0051537//2 iron, 2 sulfur …	[C]cellular anatomical entity;intracellular;[F]catalytic activity;binding;	molecular_function;cellular_component
isoform_114632
isoform_114684	[F]GO:0046872//metal ion binding;GO:0043167//ion binding;GO:0016491//oxidoreductase activity;GO:0005488//binding;GO:0043169//cation binding;GO:0003824//catalytic activity;	[F]catalytic activity;binding;	molecular_function
isoform_11470
isoform_114718	[P]GO:1901615//organic hydroxy compound metabolic process;GO:0046164//alcohol catabolic process;GO:0044237//cellular metabolic process;GO:0006066//alcohol metabolic process;GO:1901575//organic substance catabolic process;GO:0044282//small molecule catabolic process;GO:0071704//organic substance metabolic process;GO:0008152//metabolic process;GO:0044262//cellular carbohydrate metabolic process;GO:…	[C]cellular anatomical entity;intracellular;[P]cellular process;metabolic process;[F]binding;catalytic activity;	biological_process;cellular_component;molecular_function
isoform_114794
isoform_114810	[P]GO:0009414//response to water deprivation;GO:0006950//response to stress;GO:0009415//response to water;GO:0050896//response to stimulus;GO:0010035//response to inorganic substance;GO:0042221//response to chemical;GO:1901700//response to oxygen-containing compound;GO:0009628//response to abiotic stimulus;GO:0009269//response to desiccation;GO:0001101//response to acid chemical;[C]GO:0005622//in…	[C]intracellular;cellular anatomical entity;[P]response to stimulus;	biological_process;cellular_component
isoform_114813
isoform_114889
isoform_114897
isoform_114910
isoform_114914
isoform_114938	[P]GO:0006810//transport;GO:0051234//establishment of localization;GO:0055085//transmembrane transport;GO:0009987//cellular process;GO:0051179//localization;[C]GO:0016021//integral component of membrane;GO:0031224//intrinsic component of membrane;GO:0110165//cellular anatomical entity;GO:0016020//membrane;	[C]cellular anatomical entity;[P]localization;cellular process;	biological_process;cellular_component
isoform_114990	[C]GO:0071944//cell periphery;GO:0110165//cellular anatomical entity;GO:0016020//membrane;GO:0005886//plasma membrane;	[C]cellular anatomical entity;	cellular_component
isoform_115031
isoform_115071
isoform_11516	[P]GO:0008152//metabolic process;GO:0071704//organic substance metabolic process;GO:0005975//carbohydrate metabolic process;GO:0044238//primary metabolic process;[C]GO:0005886//plasma membrane;GO:0031226//intrinsic component of plasma membrane;GO:0031225//anchored component of membrane;GO:0110165//cellular anatomical entity;GO:0071944//cell periphery;GO:0031224//intrinsic component of membrane;GO…	[C]cellular anatomical entity;[P]metabolic process;[F]catalytic activity;	biological_process;cellular_component;molecular_function
isoform_11522	[F]GO:0005488//binding;GO:0043168//anion binding;GO:0036094//small molecule binding;GO:0032553//ribonucleotide binding;GO:0043167//ion binding;GO:1901265//nucleoside phosphate binding;GO:0010181//FMN binding;GO:0000166//nucleotide binding;GO:0097367//carbohydrate derivative binding;GO:0097159//organic cyclic compound binding;GO:1901363//heterocyclic compound binding;	[F]binding;	molecular_function
isoform_115240
isoform_115269
isoform_115348
isoform_11535	[C]GO:1990904//ribonucleoprotein complex;GO:0043229//intracellular organelle;GO:0032991//protein-containing complex;GO:0043227//membrane-bounded organelle;GO:0005634//nucleus;GO:0043226//organelle;GO:0005737//cytoplasm;GO:0005622//intracellular;GO:0110165//cellular anatomical entity;GO:0043231//intracellular membrane-bounded organelle;[F]GO:0005524//ATP binding;GO:0017111//nucleoside-triphosphata…	[C]protein-containing complex;intracellular;cellular anatomical entity;[F]catalytic activity;binding;	molecular_function;cellular_component
isoform_115356	[P]GO:0031326//regulation of cellular biosynthetic process;GO:0050789//regulation of biological process;GO:0031323//regulation of cellular metabolic process;GO:0006355//regulation of transcription, DNA-templated;GO:0080090//regulation of primary metabolic process;GO:2001141//regulation of RNA biosynthetic process;GO:0010556//regulation of macromolecule biosynthetic process;GO:0065007//biological …	[P]biological regulation;[F]catalytic activity;transcription regulator activity;	molecular_function;biological_process
isoform_11540	[F]GO:0043168//anion binding;GO:0005524//ATP binding;GO:1901265//nucleoside phosphate binding;GO:0032555//purine ribonucleotide binding;GO:0030554//adenyl nucleotide binding;GO:0005488//binding;GO:0032559//adenyl ribonucleotide binding;GO:1901363//heterocyclic compound binding;GO:0032553//ribonucleotide binding;GO:0036094//small molecule binding;GO:0035639//purine ribonucleoside triphosphate bind…	[F]binding;	molecular_function
isoform_115461	[F]GO:0016746//transferase activity, transferring acyl groups;GO:0003824//catalytic activity;GO:0016740//transferase activity;GO:0016747//transferase activity, transferring acyl groups other than amino-acyl groups;	[F]catalytic activity;	molecular_function
isoform_115493
isoform_1155	[C]GO:0031224//intrinsic component of membrane;GO:0016021//integral component of membrane;GO:0016020//membrane;GO:0110165//cellular anatomical entity;[F]GO:0004674//protein serine/threonine kinase activity;GO:0036094//small molecule binding;GO:0017076//purine nucleotide binding;GO:0016773//phosphotransferase activity, alcohol group as acceptor;GO:0005524//ATP binding;GO:0000166//nucleotide bindin…	[C]cellular anatomical entity;[F]binding;catalytic activity;	molecular_function;cellular_component
isoform_11554
isoform_115569
isoform_115592
isoform_11564	[P]GO:1901362//organic cyclic compound biosynthetic process;GO:0046483//heterocycle metabolic process;GO:0009987//cellular process;GO:0042724//thiamine-containing compound biosynthetic process;GO:0009228//thiamine biosynthetic process;GO:0044281//small molecule metabolic process;GO:0006807//nitrogen compound metabolic process;GO:0006790//sulfur compound metabolic process;GO:0044272//sulfur compou…	[C]intracellular;cellular anatomical entity;[P]cellular process;metabolic process;[F]binding;catalytic activity;	cellular_component;molecular_function;biological_process
isoform_115712
isoform_115737	[P]GO:0071704//organic substance metabolic process;GO:0006740//NADPH regeneration;GO:0055114//oxidation-reduction process;GO:0044237//cellular metabolic process;GO:0006793//phosphorus metabolic process;GO:0006796//phosphate-containing compound metabolic process;GO:1901135//carbohydrate derivative metabolic process;GO:0008152//metabolic process;GO:0006739//NADP metabolic process;GO:0006098//pentos…	[C]intracellular;cellular anatomical entity;[P]cellular process;metabolic process;[F]catalytic activity;	molecular_function;biological_process;cellular_component
isoform_115738	[P]GO:0071704//organic substance metabolic process;GO:0006518//peptide metabolic process;GO:0009058//biosynthetic process;GO:0006807//nitrogen compound metabolic process;GO:0016043//cellular component organization;GO:0010467//gene expression;GO:1901576//organic substance biosynthetic process;GO:0043043//peptide biosynthetic process;GO:0022618//ribonucleoprotein complex assembly;GO:0071840//cellul…	[C]cellular anatomical entity;intracellular;protein-containing complex;[P]cellular process;metabolic process;[F]structural molecule activity;	molecular_function;biological_process;cellular_component
isoform_115764
isoform_115766	[C]GO:0110165//cellular anatomical entity;GO:0016020//membrane;GO:0016021//integral component of membrane;GO:0031224//intrinsic component of membrane;	[C]cellular anatomical entity;	cellular_component
isoform_115769
isoform_115798
isoform_11580	[P]GO:0031323//regulation of cellular metabolic process;GO:0010468//regulation of gene expression;GO:1903506//regulation of nucleic acid-templated transcription;GO:0031326//regulation of cellular biosynthetic process;GO:0080090//regulation of primary metabolic process;GO:2000112//regulation of cellular macromolecule biosynthetic process;GO:0065007//biological regulation;GO:0006355//regulation of …	[C]cellular anatomical entity;intracellular;[P]biological regulation;[F]binding;	cellular_component;biological_process;molecular_function
isoform_115817
isoform_115944
isoform_115976
isoform_116001	[P]GO:0008152//metabolic process;GO:0071704//organic substance metabolic process;GO:0009987//cellular process;GO:0015977//carbon fixation;GO:0044237//cellular metabolic process;GO:0009853//photorespiration;GO:0015979//photosynthesis;GO:0043094//cellular metabolic compound salvage;[C]GO:0043229//intracellular organelle;GO:0043227//membrane-bounded organelle;GO:0005622//intracellular;GO:0009536//pl…	[C]intracellular;cellular anatomical entity;[P]metabolic process;cellular process;[F]catalytic activity;	biological_process;cellular_component;molecular_function
isoform_116066
isoform_116077
isoform_11630	[C]GO:0016021//integral component of membrane;GO:0016020//membrane;GO:0110165//cellular anatomical entity;GO:0031224//intrinsic component of membrane;[F]GO:0008237//metallopeptidase activity;GO:0005524//ATP binding;GO:0030554//adenyl nucleotide binding;GO:0032559//adenyl ribonucleotide binding;GO:0035639//purine ribonucleoside triphosphate binding;GO:0017076//purine nucleotide binding;GO:0032555/…	[C]cellular anatomical entity;[F]binding;catalytic activity;	molecular_function;cellular_component
isoform_116340	[P]GO:0071840//cellular component organization or biogenesis;GO:0007017//microtubule-based process;GO:0007049//cell cycle;GO:0006996//organelle organization;GO:0000226//microtubule cytoskeleton organization;GO:0009987//cellular process;GO:0000278//mitotic cell cycle;GO:0016043//cellular component organization;GO:0007010//cytoskeleton organization;[C]GO:0099081//supramolecular polymer;GO:0043229//…	[C]intracellular;cellular anatomical entity;[P]cellular process;[F]structural molecule activity;binding;catalytic activity;	molecular_function;cellular_component;biological_process
isoform_116343	[P]GO:0006355//regulation of transcription, DNA-templated;GO:0032502//developmental process;GO:0051252//regulation of RNA metabolic process;GO:0060255//regulation of macromolecule metabolic process;GO:0010468//regulation of gene expression;GO:0050789//regulation of biological process;GO:1901576//organic substance biosynthetic process;GO:0032501//multicellular organismal process;GO:0009790//embryo…	[C]cellular anatomical entity;protein-containing complex;intracellular;[P]multicellular organismal process;metabolic process;reproductive process;cellular process;developmental process;biological regulation;reproduction;[F]translation regulator activity;transcription regulator activity;binding;	biological_process;molecular_function;cellular_component
isoform_116370	[F]GO:0005488//binding;GO:0003824//catalytic activity;GO:0043169//cation binding;GO:0051213//dioxygenase activity;GO:0043167//ion binding;GO:0016491//oxidoreductase activity;GO:0046872//metal ion binding;	[F]binding;catalytic activity;	molecular_function
isoform_11651	[P]GO:0006302//double-strand break repair;GO:0016233//telomere capping;GO:0065007//biological regulation;GO:0000726//non-recombinational repair;GO:0044260//cellular macromolecule metabolic process;GO:0044238//primary metabolic process;GO:0032200//telomere organization;GO:0044237//cellular metabolic process;GO:0071704//organic substance metabolic process;GO:0008152//metabolic process;GO:0016043//c…	[C]cellular anatomical entity;intracellular;[P]biological regulation;cellular process;metabolic process;response to stimulus;[F]catalytic activity;binding;	molecular_function;cellular_component;biological_process
isoform_11652	[C]GO:0031224//intrinsic component of membrane;GO:0110165//cellular anatomical entity;GO:0016021//integral component of membrane;GO:0016020//membrane;[F]GO:0005509//calcium ion binding;GO:0043169//cation binding;GO:0046872//metal ion binding;GO:0005488//binding;GO:0043167//ion binding;	[C]cellular anatomical entity;[F]binding;	molecular_function;cellular_component
isoform_116595
isoform_116633
isoform_116645	[F]GO:0005488//binding;GO:0005515//protein binding;GO:0046983//protein dimerization activity;	[F]binding;	molecular_function
isoform_116663	[P]GO:0009987//cellular process;GO:0008152//metabolic process;GO:0044281//small molecule metabolic process;GO:0042181//ketone biosynthetic process;GO:0006744//ubiquinone biosynthetic process;GO:0009058//biosynthetic process;GO:0042180//cellular ketone metabolic process;GO:0044283//small molecule biosynthetic process;GO:1901576//organic substance biosynthetic process;GO:1901663//quinone biosynthet…	[C]cellular anatomical entity;intracellular;[P]metabolic process;cellular process;	biological_process;cellular_component
isoform_116717	[C]GO:0005576//extracellular region;GO:0110165//cellular anatomical entity;	[C]cellular anatomical entity;	cellular_component
isoform_116779
isoform_116811
isoform_116897
isoform_116912	[P]GO:0015979//photosynthesis;GO:0008152//metabolic process;GO:0009987//cellular process;GO:0010109//regulation of photosynthesis;GO:0043467//regulation of generation of precursor metabolites and energy;GO:0065007//biological regulation;GO:0050789//regulation of biological process;GO:0042549//photosystem II stabilization;GO:0042548//regulation of photosynthesis, light reaction;GO:0019222//regulat…	[C]cellular anatomical entity;protein-containing complex;intracellular;[P]biological regulation;cellular process;metabolic process;	cellular_component;biological_process
isoform_116954
isoform_116960	[P]GO:0000377//RNA splicing, via transesterification reactions with bulged adenosine as nucleophile;GO:0006725//cellular aromatic compound metabolic process;GO:0044267//cellular protein metabolic process;GO:0008380//RNA splicing;GO:0006397//mRNA processing;GO:0010467//gene expression;GO:0090304//nucleic acid metabolic process;GO:1901360//organic cyclic compound metabolic process;GO:1901564//organ…	[C]cellular anatomical entity;intracellular;[P]metabolic process;cellular process;[F]protein tag;	molecular_function;biological_process;cellular_component
isoform_117	[C]GO:0016020//membrane;GO:0110165//cellular anatomical entity;GO:0031224//intrinsic component of membrane;GO:0016021//integral component of membrane;[F]GO:0043168//anion binding;GO:0016817//hydrolase activity, acting on acid anhydrides;GO:0016787//hydrolase activity;GO:0032555//purine ribonucleotide binding;GO:0097367//carbohydrate derivative binding;GO:0030554//adenyl nucleotide binding;GO:1901…	[C]cellular anatomical entity;[F]catalytic activity;transporter activity;binding;	molecular_function;cellular_component
isoform_117077
isoform_11708	[P]GO:0016053//organic acid biosynthetic process;GO:0044281//small molecule metabolic process;GO:0044238//primary metabolic process;GO:0043648//dicarboxylic acid metabolic process;GO:1901362//organic cyclic compound biosynthetic process;GO:0071704//organic substance metabolic process;GO:0009073//aromatic amino acid family biosynthetic process;GO:0044283//small molecule biosynthetic process;GO:004…	[C]intracellular;cellular anatomical entity;[P]metabolic process;cellular process;[F]catalytic activity;	cellular_component;molecular_function;biological_process
isoform_117405
isoform_117441
isoform_117442
isoform_11750	[P]GO:0016053//organic acid biosynthetic process;GO:0006629//lipid metabolic process;GO:0009058//biosynthetic process;GO:0071704//organic substance metabolic process;GO:0009987//cellular process;GO:0044238//primary metabolic process;GO:0043436//oxoacid metabolic process;GO:0032787//monocarboxylic acid metabolic process;GO:0006082//organic acid metabolic process;GO:0044255//cellular lipid metaboli…	[C]cellular anatomical entity;intracellular;[P]cellular process;metabolic process;[F]catalytic activity;	cellular_component;biological_process;molecular_function
isoform_117512
isoform_117536	[P]GO:0051179//localization;GO:0009987//cellular process;GO:0034220//ion transmembrane transport;GO:0006810//transport;GO:0051234//establishment of localization;GO:0055085//transmembrane transport;GO:0006811//ion transport;[C]GO:0043227//membrane-bounded organelle;GO:0031354//intrinsic component of plastid outer membrane;GO:0009507//chloroplast;GO:0005622//intracellular;GO:0110165//cellular anato…	[C]cellular anatomical entity;intracellular;[P]localization;cellular process;[F]transporter activity;	cellular_component;molecular_function;biological_process
isoform_117581	[P]GO:0051301//cell division;GO:0051173//positive regulation of nitrogen compound metabolic process;GO:0060255//regulation of macromolecule metabolic process;GO:0043085//positive regulation of catalytic activity;GO:0031401//positive regulation of protein modification process;GO:0080090//regulation of primary metabolic process;GO:0032268//regulation of cellular protein metabolic process;GO:0007049…	[C]intracellular;protein-containing complex;[P]cellular process;biological regulation;[F]binding;molecular function regulator;catalytic activity;	molecular_function;biological_process;cellular_component
isoform_117599
isoform_117612	[P]GO:0044260//cellular macromolecule metabolic process;GO:0009059//macromolecule biosynthetic process;GO:0043603//cellular amide metabolic process;GO:0071704//organic substance metabolic process;GO:0008152//metabolic process;GO:0044238//primary metabolic process;GO:0006518//peptide metabolic process;GO:0034645//cellular macromolecule biosynthetic process;GO:0043043//peptide biosynthetic process;…	[C]intracellular;cellular anatomical entity;[P]cellular process;metabolic process;[F]translation regulator activity;binding;catalytic activity;	cellular_component;molecular_function;biological_process
isoform_117668	[P]GO:0034641//cellular nitrogen compound metabolic process;GO:0044237//cellular metabolic process;GO:0009987//cellular process;GO:0016070//RNA metabolic process;GO:0008152//metabolic process;GO:0071704//organic substance metabolic process;GO:0006396//RNA processing;GO:0006139//nucleobase-containing compound metabolic process;GO:0006725//cellular aromatic compound metabolic process;GO:0090304//nu…	[P]cellular process;metabolic process;	biological_process
isoform_117744	[P]GO:0015979//photosynthesis;GO:0043170//macromolecule metabolic process;GO:0044238//primary metabolic process;GO:0036211//protein modification process;GO:0044260//cellular macromolecule metabolic process;GO:0043412//macromolecule modification;GO:0071704//organic substance metabolic process;GO:0019684//photosynthesis, light reaction;GO:0006464//cellular protein modification process;GO:0044267//c…	[C]intracellular;protein-containing complex;cellular anatomical entity;[P]metabolic process;cellular process;[F]binding;transporter activity;	molecular_function;biological_process;cellular_component
isoform_117823
isoform_117845	[P]GO:0050794//regulation of cellular process;GO:0009058//biosynthetic process;GO:1902903//regulation of supramolecular fiber organization;GO:0031334//positive regulation of protein-containing complex assembly;GO:0009987//cellular process;GO:0010467//gene expression;GO:0031116//positive regulation of microtubule polymerization;GO:0031112//positive regulation of microtubule polymerization or depol…	[C]protein-containing complex;intracellular;cellular anatomical entity;[P]metabolic process;cellular process;biological regulation;[F]binding;structural molecule activity;	molecular_function;cellular_component;biological_process
isoform_117872	[P]GO:0044085//cellular component biogenesis;GO:0022613//ribonucleoprotein complex biogenesis;GO:0009987//cellular process;GO:0071840//cellular component organization or biogenesis;GO:0042254//ribosome biogenesis;[C]GO:1990904//ribonucleoprotein complex;GO:0032991//protein-containing complex;	[C]protein-containing complex;[P]cellular process;	cellular_component;biological_process
isoform_117878	[P]GO:0019538//protein metabolic process;GO:0043412//macromolecule modification;GO:0006091//generation of precursor metabolites and energy;GO:0044267//cellular protein metabolic process;GO:0006807//nitrogen compound metabolic process;GO:1901564//organonitrogen compound metabolic process;GO:0044237//cellular metabolic process;GO:0006464//cellular protein modification process;GO:0018298//protein-ch…	[C]intracellular;protein-containing complex;cellular anatomical entity;[P]metabolic process;cellular process;[F]binding;	molecular_function;cellular_component;biological_process
isoform_117940
isoform_11812	[F]GO:1901363//heterocyclic compound binding;GO:0097159//organic cyclic compound binding;GO:0032553//ribonucleotide binding;GO:0097367//carbohydrate derivative binding;GO:0036094//small molecule binding;GO:1901265//nucleoside phosphate binding;GO:0005488//binding;GO:0035639//purine ribonucleoside triphosphate binding;GO:0005524//ATP binding;GO:0000166//nucleotide binding;GO:0043167//ion binding;G…	[F]binding;	molecular_function
isoform_118170	[P]GO:0050789//regulation of biological process;GO:0006355//regulation of transcription, DNA-templated;GO:0009890//negative regulation of biosynthetic process;GO:0051252//regulation of RNA metabolic process;GO:0065007//biological regulation;GO:0009892//negative regulation of metabolic process;GO:1903506//regulation of nucleic acid-templated transcription;GO:0060255//regulation of macromolecule me…	[C]cellular anatomical entity;[P]biological regulation;	biological_process;cellular_component
isoform_118207
isoform_118212
isoform_118345	[C]GO:0110165//cellular anatomical entity;GO:0005576//extracellular region;	[C]cellular anatomical entity;	cellular_component
isoform_118370	[P]GO:0000226//microtubule cytoskeleton organization;GO:0006996//organelle organization;GO:0007049//cell cycle;GO:0009987//cellular process;GO:0071840//cellular component organization or biogenesis;GO:0007010//cytoskeleton organization;GO:0007017//microtubule-based process;GO:0000278//mitotic cell cycle;GO:0016043//cellular component organization;[C]GO:0043229//intracellular organelle;GO:0005622/…	[C]intracellular;cellular anatomical entity;[P]cellular process;[F]binding;structural molecule activity;catalytic activity;	molecular_function;cellular_component;biological_process
isoform_118395
isoform_118413
isoform_118419
isoform_118512	[C]GO:0110165//cellular anatomical entity;GO:0016021//integral component of membrane;GO:0031224//intrinsic component of membrane;GO:0016020//membrane;	[C]cellular anatomical entity;	cellular_component
isoform_118554
isoform_1186
isoform_118683
isoform_118721
isoform_11875	[P]GO:0005975//carbohydrate metabolic process;GO:0008152//metabolic process;GO:0044238//primary metabolic process;GO:0071704//organic substance metabolic process;[C]GO:0110165//cellular anatomical entity;GO:0031224//intrinsic component of membrane;GO:0016021//integral component of membrane;GO:0016020//membrane;[F]GO:0003824//catalytic activity;GO:0016787//hydrolase activity;GO:0016798//hydrolase …	[C]cellular anatomical entity;[P]metabolic process;[F]catalytic activity;	molecular_function;biological_process;cellular_component
isoform_118753
isoform_118762
isoform_118795
isoform_118945
isoform_118947
isoform_118981	[C]GO:0043231//intracellular membrane-bounded organelle;GO:0016020//membrane;GO:0005737//cytoplasm;GO:0043227//membrane-bounded organelle;GO:0042651//thylakoid membrane;GO:0031976//plastid thylakoid;GO:0031984//organelle subcompartment;GO:0055035//plastid thylakoid membrane;GO:0005622//intracellular;GO:0009507//chloroplast;GO:0043226//organelle;GO:0034357//photosynthetic membrane;GO:0110165//cell…	[C]cellular anatomical entity;intracellular;[F]binding;catalytic activity;	molecular_function;cellular_component
isoform_119063
isoform_119073	[C]GO:0016021//integral component of membrane;GO:0110165//cellular anatomical entity;GO:0031224//intrinsic component of membrane;GO:0016020//membrane;	[C]cellular anatomical entity;	cellular_component
isoform_119117
isoform_119194	[C]GO:0110165//cellular anatomical entity;GO:0005576//extracellular region;	[C]cellular anatomical entity;	cellular_component
isoform_119309	[P]GO:0050789//regulation of biological process;GO:0006091//generation of precursor metabolites and energy;GO:0031647//regulation of protein stability;GO:0042548//regulation of photosynthesis, light reaction;GO:0065007//biological regulation;GO:0043467//regulation of generation of precursor metabolites and energy;GO:0008152//metabolic process;GO:0010109//regulation of photosynthesis;GO:0022900//e…	[C]intracellular;protein-containing complex;cellular anatomical entity;[P]biological regulation;metabolic process;cellular process;	biological_process;cellular_component
isoform_11932	[P]GO:0050896//response to stimulus;GO:0050794//regulation of cellular process;GO:0051716//cellular response to stimulus;GO:0050789//regulation of biological process;GO:0007165//signal transduction;GO:0023052//signaling;GO:0007154//cell communication;GO:0065007//biological regulation;GO:0009987//cellular process;[C]GO:0016021//integral component of membrane;GO:0110165//cellular anatomical entity;…	[C]cellular anatomical entity;[P]response to stimulus;signaling;biological regulation;cellular process;[F]binding;	molecular_function;cellular_component;biological_process
isoform_119397
isoform_119406
isoform_119486
isoform_119521
isoform_119528
isoform_11954	[P]GO:0071704//organic substance metabolic process;GO:0009058//biosynthetic process;GO:0009987//cellular process;GO:0044237//cellular metabolic process;GO:0016053//organic acid biosynthetic process;GO:0006633//fatty acid biosynthetic process;GO:0032787//monocarboxylic acid metabolic process;GO:0019752//carboxylic acid metabolic process;GO:0044281//small molecule metabolic process;GO:0046394//carb…	[C]cellular anatomical entity;[P]metabolic process;cellular process;[F]catalytic activity;	molecular_function;cellular_component;biological_process
isoform_119555
isoform_119713	[P]GO:0051234//establishment of localization;GO:0006810//transport;GO:0009987//cellular process;GO:0055085//transmembrane transport;GO:0051179//localization;[C]GO:0110165//cellular anatomical entity;GO:0016021//integral component of membrane;GO:0031224//intrinsic component of membrane;GO:0016020//membrane;	[C]cellular anatomical entity;[P]cellular process;localization;	biological_process;cellular_component
isoform_119740	[F]GO:0016740//transferase activity;GO:0140096//catalytic activity, acting on a protein;GO:0019787//ubiquitin-like protein transferase activity;GO:0003824//catalytic activity;GO:0004842//ubiquitin-protein transferase activity;	[F]catalytic activity;	molecular_function
isoform_11985	[P]GO:0044248//cellular catabolic process;GO:0005984//disaccharide metabolic process;GO:0044238//primary metabolic process;GO:0009311//oligosaccharide metabolic process;GO:0009056//catabolic process;GO:0009987//cellular process;GO:0009313//oligosaccharide catabolic process;GO:0005987//sucrose catabolic process;GO:0044237//cellular metabolic process;GO:0008152//metabolic process;GO:0016052//carboh…	[C]intracellular;cellular anatomical entity;[P]cellular process;metabolic process;[F]catalytic activity;	biological_process;cellular_component;molecular_function
isoform_119860
isoform_119883
isoform_119937
isoform_120092
isoform_12011
isoform_120133
isoform_120147
isoform_12020	[C]GO:0042995//cell projection;GO:0031514//motile cilium;GO:0120025//plasma membrane bounded cell projection;GO:0005929//cilium;GO:0043226//organelle;GO:0110165//cellular anatomical entity;	[C]cellular anatomical entity;	cellular_component
isoform_12027	[C]GO:0016020//membrane;GO:0031224//intrinsic component of membrane;GO:0110165//cellular anatomical entity;GO:0016021//integral component of membrane;	[C]cellular anatomical entity;	cellular_component
isoform_12028	[P]GO:0071702//organic substance transport;GO:0006810//transport;GO:0051179//localization;GO:0051234//establishment of localization;GO:0008643//carbohydrate transport;[C]GO:0031224//intrinsic component of membrane;GO:0016020//membrane;GO:0110165//cellular anatomical entity;GO:0016021//integral component of membrane;[F]GO:0022857//transmembrane transporter activity;GO:0005215//transporter activity;	[C]cellular anatomical entity;[P]localization;[F]transporter activity;	biological_process;cellular_component;molecular_function
isoform_120284	[F]GO:0097367//carbohydrate derivative binding;GO:0008061//chitin binding;GO:0005488//binding;	[F]binding;	molecular_function
isoform_120309	[F]GO:0016853//isomerase activity;GO:0003755//peptidyl-prolyl cis-trans isomerase activity;GO:0016859//cis-trans isomerase activity;GO:0003824//catalytic activity;GO:0140096//catalytic activity, acting on a protein;	[F]catalytic activity;	molecular_function
isoform_120313	[P]GO:0044237//cellular metabolic process;GO:0008152//metabolic process;GO:0044262//cellular carbohydrate metabolic process;GO:0030388//fructose 1,6-bisphosphate metabolic process;GO:0046351//disaccharide biosynthetic process;GO:0009058//biosynthetic process;GO:0005975//carbohydrate metabolic process;GO:0044283//small molecule biosynthetic process;GO:0006006//glucose metabolic process;GO:0044281/…	[C]intracellular;cellular anatomical entity;[P]cellular process;metabolic process;[F]catalytic activity;	biological_process;molecular_function;cellular_component
isoform_120588
isoform_120715	[C]GO:0031224//intrinsic component of membrane;GO:0016020//membrane;GO:0016021//integral component of membrane;GO:0110165//cellular anatomical entity;GO:0005576//extracellular region;[F]GO:0003824//catalytic activity;GO:0140096//catalytic activity, acting on a protein;GO:0016740//transferase activity;GO:0019787//ubiquitin-like protein transferase activity;GO:0004842//ubiquitin-protein transferase…	[C]cellular anatomical entity;[F]catalytic activity;	molecular_function;cellular_component
isoform_120817
isoform_120830	[C]GO:0016020//membrane;GO:0110165//cellular anatomical entity;GO:0016021//integral component of membrane;GO:0031224//intrinsic component of membrane;	[C]cellular anatomical entity;	cellular_component
isoform_120966
isoform_12101	[P]GO:0042723//thiamine-containing compound metabolic process;GO:0044272//sulfur compound biosynthetic process;GO:0007584//response to nutrient;GO:0009058//biosynthetic process;GO:0031667//response to nutrient levels;GO:0006772//thiamine metabolic process;GO:0009605//response to external stimulus;GO:0042364//water-soluble vitamin biosynthetic process;GO:0019438//aromatic compound biosynthetic pro…	[C]intracellular;cellular anatomical entity;[P]response to stimulus;metabolic process;cellular process;[F]catalytic activity;binding;	biological_process;cellular_component;molecular_function
isoform_121132
isoform_121183
isoform_121205
isoform_121242
isoform_121330
isoform_121420
isoform_12143	[C]GO:0110165//cellular anatomical entity;GO:0016021//integral component of membrane;GO:0016020//membrane;GO:0031224//intrinsic component of membrane;[F]GO:0003824//catalytic activity;GO:0046906//tetrapyrrole binding;GO:0046872//metal ion binding;GO:0005506//iron ion binding;GO:0020037//heme binding;GO:0046914//transition metal ion binding;GO:1901363//heterocyclic compound binding;GO:0005488//bin…	[C]cellular anatomical entity;[F]catalytic activity;binding;	cellular_component;molecular_function
isoform_121453
isoform_12154	[F]GO:0003824//catalytic activity;GO:0016491//oxidoreductase activity;	[F]catalytic activity;	molecular_function
isoform_12155	[C]GO:0016020//membrane;GO:0016021//integral component of membrane;GO:0031224//intrinsic component of membrane;GO:0110165//cellular anatomical entity;[F]GO:0035639//purine ribonucleoside triphosphate binding;GO:1901363//heterocyclic compound binding;GO:0003824//catalytic activity;GO:0043167//ion binding;GO:0016740//transferase activity;GO:0004674//protein serine/threonine kinase activity;GO:00360…	[C]cellular anatomical entity;[F]catalytic activity;binding;	cellular_component;molecular_function
isoform_121580	[P]GO:0009719//response to endogenous stimulus;GO:0009725//response to hormone;GO:0009733//response to auxin;GO:0010033//response to organic substance;GO:0042221//response to chemical;GO:0050896//response to stimulus;	[P]response to stimulus;	biological_process
isoform_12169	[P]GO:0072528//pyrimidine-containing compound biosynthetic process;GO:0006790//sulfur compound metabolic process;GO:0044272//sulfur compound biosynthetic process;GO:0009987//cellular process;GO:0009228//thiamine biosynthetic process;GO:0008152//metabolic process;GO:0018130//heterocycle biosynthetic process;GO:1901360//organic cyclic compound metabolic process;GO:1901698//response to nitrogen comp…	[C]cellular anatomical entity;intracellular;[P]cellular process;metabolic process;response to stimulus;[F]catalytic activity;binding;	molecular_function;biological_process;cellular_component
isoform_121737	[P]GO:0009416//response to light stimulus;GO:0009314//response to radiation;GO:0006091//generation of precursor metabolites and energy;GO:0015979//photosynthesis;GO:0044085//cellular component biogenesis;GO:0009644//response to high light intensity;GO:0009628//response to abiotic stimulus;GO:0007623//circadian rhythm;GO:0044237//cellular metabolic process;GO:0071840//cellular component organizati…	[C]protein-containing complex;cellular anatomical entity;intracellular;[P]rhythmic process;response to stimulus;cellular process;metabolic process;	cellular_component;biological_process
isoform_121744	[P]GO:0016070//RNA metabolic process;GO:0034641//cellular nitrogen compound metabolic process;GO:0009987//cellular process;GO:0044237//cellular metabolic process;GO:0008152//metabolic process;GO:0090304//nucleic acid metabolic process;GO:0006139//nucleobase-containing compound metabolic process;GO:0043170//macromolecule metabolic process;GO:0046483//heterocycle metabolic process;GO:0044238//prima…	[P]metabolic process;cellular process;	biological_process
isoform_121864
isoform_12193	[F]GO:0005488//binding;GO:1901363//heterocyclic compound binding;GO:0046872//metal ion binding;GO:1901681//sulfur compound binding;GO:0097159//organic cyclic compound binding;GO:0043169//cation binding;GO:0036094//small molecule binding;GO:0030976//thiamine pyrophosphate binding;GO:0019842//vitamin binding;GO:0016829//lyase activity;GO:0000287//magnesium ion binding;GO:0003824//catalytic activity…	[F]catalytic activity;binding;	molecular_function
isoform_121946
isoform_122162
isoform_12233
isoform_122431
isoform_122521	[F]GO:0016740//transferase activity;GO:0003677//DNA binding;GO:1901363//heterocyclic compound binding;GO:0004842//ubiquitin-protein transferase activity;GO:0003676//nucleic acid binding;GO:0005488//binding;GO:0097159//organic cyclic compound binding;GO:0019787//ubiquitin-like protein transferase activity;GO:0140096//catalytic activity, acting on a protein;GO:0003824//catalytic activity;	[F]binding;catalytic activity;	molecular_function
isoform_122706
isoform_122798
isoform_122862	[C]GO:0016020//membrane;GO:0016021//integral component of membrane;GO:0110165//cellular anatomical entity;GO:0031224//intrinsic component of membrane;	[C]cellular anatomical entity;	cellular_component
isoform_12293	[C]GO:0016020//membrane;GO:0110165//cellular anatomical entity;GO:0031224//intrinsic component of membrane;GO:0016021//integral component of membrane;	[C]cellular anatomical entity;	cellular_component
isoform_123058
isoform_123100
isoform_123238
isoform_123328
isoform_123526
isoform_123660
isoform_123679
isoform_123841
isoform_123875	[P]GO:0009987//cellular process;GO:0006807//nitrogen compound metabolic process;GO:0043604//amide biosynthetic process;GO:0044265//cellular macromolecule catabolic process;GO:0044249//cellular biosynthetic process;GO:1901566//organonitrogen compound biosynthetic process;GO:0006518//peptide metabolic process;GO:0051603//proteolysis involved in cellular protein catabolic process;GO:0019941//modific…	[C]cellular anatomical entity;intracellular;[P]metabolic process;cellular process;[F]structural molecule activity;binding;protein tag;	cellular_component;biological_process;molecular_function
isoform_1240	[P]GO:0007017//microtubule-based process;GO:0009987//cellular process;GO:0006928//movement of cell or subcellular component;GO:0007018//microtubule-based movement;[C]GO:0099512//supramolecular fiber;GO:0043229//intracellular organelle;GO:0005874//microtubule;GO:0043232//intracellular non-membrane-bounded organelle;GO:0099080//supramolecular complex;GO:0099513//polymeric cytoskeletal fiber;GO:0043…	[C]intracellular;cellular anatomical entity;[P]cellular process;[F]catalytic activity;binding;	molecular_function;biological_process;cellular_component
isoform_124041
isoform_12419
isoform_124209
isoform_12423	[P]GO:0005975//carbohydrate metabolic process;GO:0009056//catabolic process;GO:0008152//metabolic process;GO:0043170//macromolecule metabolic process;GO:0009057//macromolecule catabolic process;GO:0016052//carbohydrate catabolic process;GO:1901575//organic substance catabolic process;GO:0044238//primary metabolic process;GO:0071704//organic substance metabolic process;GO:0000272//polysaccharide c…	[P]metabolic process;[F]catalytic activity;	biological_process;molecular_function
isoform_124246
isoform_124250	[P]GO:0051179//localization;GO:0006810//transport;GO:0051234//establishment of localization;GO:0006811//ion transport;GO:0006812//cation transport;GO:0030001//metal ion transport;[F]GO:0005488//binding;GO:0043169//cation binding;GO:0046872//metal ion binding;GO:0043167//ion binding;	[P]localization;[F]binding;	biological_process;molecular_function
isoform_124323	[P]GO:0015979//photosynthesis;GO:0044237//cellular metabolic process;GO:0008152//metabolic process;GO:0009987//cellular process;[C]GO:1990204//oxidoreductase complex;GO:0016021//integral component of membrane;GO:0031224//intrinsic component of membrane;GO:0005622//intracellular;GO:0032991//protein-containing complex;GO:0009579//thylakoid;GO:1902494//catalytic complex;GO:0110165//cellular anatomic…	[C]protein-containing complex;cellular anatomical entity;intracellular;[P]cellular process;metabolic process;	biological_process;cellular_component
isoform_124405
isoform_124409	[P]GO:0044237//cellular metabolic process;GO:0006807//nitrogen compound metabolic process;GO:0090304//nucleic acid metabolic process;GO:0034641//cellular nitrogen compound metabolic process;GO:0044238//primary metabolic process;GO:0046483//heterocycle metabolic process;GO:0043170//macromolecule metabolic process;GO:0006725//cellular aromatic compound metabolic process;GO:0010467//gene expression;…	[P]cellular process;metabolic process;	biological_process
isoform_12448	[P]GO:0006082//organic acid metabolic process;GO:0019632//shikimate metabolic process;GO:0009987//cellular process;GO:0044237//cellular metabolic process;GO:0019752//carboxylic acid metabolic process;GO:1901615//organic hydroxy compound metabolic process;GO:0044281//small molecule metabolic process;GO:0008152//metabolic process;GO:0071704//organic substance metabolic process;GO:0043436//oxoacid m…	[P]cellular process;metabolic process;[F]catalytic activity;binding;	biological_process;molecular_function
isoform_124581
isoform_12464	[P]GO:0071365//cellular response to auxin stimulus;GO:0071310//cellular response to organic substance;GO:0048856//anatomical structure development;GO:0010033//response to organic substance;GO:0050896//response to stimulus;GO:0000902//cell morphogenesis;GO:0048878//chemical homeostasis;GO:0010252//auxin homeostasis;GO:0065008//regulation of biological quality;GO:0032502//developmental process;GO:0…	[C]intracellular;cellular anatomical entity;[P]growth;signaling;response to stimulus;biological regulation;developmental process;cellular process;[F]catalytic activity;	cellular_component;biological_process;molecular_function
isoform_124686
isoform_12472	[P]GO:0044260//cellular macromolecule metabolic process;GO:0018022//peptidyl-lysine methylation;GO:0006464//cellular protein modification process;GO:0044237//cellular metabolic process;GO:0043170//macromolecule metabolic process;GO:0044267//cellular protein metabolic process;GO:0008213//protein alkylation;GO:0018205//peptidyl-lysine modification;GO:0008152//metabolic process;GO:0018026//peptidyl-…	[P]cellular process;metabolic process;[F]catalytic activity;	biological_process;molecular_function
isoform_12477	[P]GO:0006575//cellular modified amino acid metabolic process;GO:0034641//cellular nitrogen compound metabolic process;GO:0043604//amide biosynthetic process;GO:0006749//glutathione metabolic process;GO:0009058//biosynthetic process;GO:0043043//peptide biosynthetic process;GO:0019184//nonribosomal peptide biosynthetic process;GO:0044271//cellular nitrogen compound biosynthetic process;GO:0009987/…	[C]cellular anatomical entity;intracellular;[P]metabolic process;cellular process;[F]catalytic activity;binding;	biological_process;molecular_function;cellular_component
isoform_12493	[P]GO:0043413//macromolecule glycosylation;GO:1901576//organic substance biosynthetic process;GO:1901564//organonitrogen compound metabolic process;GO:0044249//cellular biosynthetic process;GO:0044238//primary metabolic process;GO:0006807//nitrogen compound metabolic process;GO:0043170//macromolecule metabolic process;GO:0071704//organic substance metabolic process;GO:0044267//cellular protein me…	[C]cellular anatomical entity;[P]cellular process;metabolic process;[F]catalytic activity;	biological_process;cellular_component;molecular_function
isoform_124961
isoform_12499
isoform_125	[P]GO:0044283//small molecule biosynthetic process;GO:0006541//glutamine metabolic process;GO:0044238//primary metabolic process;GO:0009064//glutamine family amino acid metabolic process;GO:0008652//cellular amino acid biosynthetic process;GO:0071704//organic substance metabolic process;GO:0044237//cellular metabolic process;GO:0044281//small molecule metabolic process;GO:1901566//organonitrogen …	[P]nitrogen utilization;metabolic process;cellular process;[F]catalytic activity;	biological_process;molecular_function
isoform_125001
isoform_12505
isoform_125069
isoform_1251
isoform_125379
isoform_12549
isoform_1255	[P]GO:0044703//multi-organism reproductive process;GO:0007135//meiosis II;GO:0000003//reproduction;GO:0006996//organelle organization;GO:0022402//cell cycle process;GO:0007142//male meiosis II;GO:0007140//male meiotic nuclear division;GO:0051321//meiotic cell cycle;GO:0000280//nuclear division;GO:0019953//sexual reproduction;GO:0007276//gamete generation;GO:0007049//cell cycle;GO:1903046//meiotic…	[P]cellular process;reproduction;multi-organism process;reproductive process;multicellular organismal process;	biological_process
isoform_125541	[C]GO:0110165//cellular anatomical entity;GO:0016021//integral component of membrane;GO:0031224//intrinsic component of membrane;GO:0016020//membrane;	[C]cellular anatomical entity;	cellular_component
isoform_12555
isoform_12562	[P]GO:0043170//macromolecule metabolic process;GO:0019252//starch biosynthetic process;GO:0009987//cellular process;GO:0033692//cellular polysaccharide biosynthetic process;GO:0015980//energy derivation by oxidation of organic compounds;GO:0034645//cellular macromolecule biosynthetic process;GO:0008152//metabolic process;GO:0034637//cellular carbohydrate biosynthetic process;GO:0005978//glycogen …	[C]intracellular;cellular anatomical entity;[P]cellular process;metabolic process;[F]catalytic activity;binding;	biological_process;cellular_component;molecular_function
isoform_125720
isoform_12581	[C]GO:0043231//intracellular membrane-bounded organelle;GO:0043226//organelle;GO:0043229//intracellular organelle;GO:0110165//cellular anatomical entity;GO:0005634//nucleus;GO:0005622//intracellular;GO:0043227//membrane-bounded organelle;[F]GO:0005488//binding;GO:1901363//heterocyclic compound binding;GO:0003676//nucleic acid binding;GO:0097159//organic cyclic compound binding;GO:0003677//DNA bin…	[C]intracellular;cellular anatomical entity;[F]binding;	cellular_component;molecular_function
isoform_126277
isoform_126522
isoform_12658	[C]GO:0110165//cellular anatomical entity;GO:0016020//membrane;GO:0031224//intrinsic component of membrane;GO:0016021//integral component of membrane;	[C]cellular anatomical entity;	cellular_component
isoform_1266	[P]GO:0050794//regulation of cellular process;GO:0006275//regulation of DNA replication;GO:0008156//negative regulation of DNA replication;GO:2000112//regulation of cellular macromolecule biosynthetic process;GO:2000113//negative regulation of cellular macromolecule biosynthetic process;GO:0009889//regulation of biosynthetic process;GO:0051716//cellular response to stimulus;GO:0009059//macromolec…	[C]cellular anatomical entity;intracellular;[P]biological regulation;metabolic process;response to stimulus;cellular process;[F]catalytic activity;binding;	cellular_component;molecular_function;biological_process
isoform_12670	[F]GO:0098772//molecular function regulator;GO:0005488//binding;GO:0019899//enzyme binding;GO:0005515//protein binding;GO:0051020//GTPase binding;GO:0005085//guanyl-nucleotide exchange factor activity;GO:0031267//small GTPase binding;GO:0017016//Ras GTPase binding;GO:0005089//Rho guanyl-nucleotide exchange factor activity;GO:0005088//Ras guanyl-nucleotide exchange factor activity;GO:0017048//Rho …	[F]molecular function regulator;binding;	molecular_function
isoform_126930
isoform_12708
isoform_12735	[F]GO:0140096//catalytic activity, acting on a protein;GO:0016787//hydrolase activity;GO:0004722//protein serine/threonine phosphatase activity;GO:0004721//phosphoprotein phosphatase activity;GO:0042578//phosphoric ester hydrolase activity;GO:0003824//catalytic activity;GO:0016791//phosphatase activity;GO:0016788//hydrolase activity, acting on ester bonds;	[F]catalytic activity;	molecular_function
isoform_12743
isoform_12764	[C]GO:0110165//cellular anatomical entity;GO:0016021//integral component of membrane;GO:0031224//intrinsic component of membrane;GO:0016020//membrane;[F]GO:0036094//small molecule binding;GO:0005524//ATP binding;GO:0030554//adenyl nucleotide binding;GO:0000166//nucleotide binding;GO:0016772//transferase activity, transferring phosphorus-containing groups;GO:0032559//adenyl ribonucleotide binding;…	[C]cellular anatomical entity;[F]catalytic activity;binding;	cellular_component;molecular_function
isoform_127710
isoform_127725
isoform_12784	[P]GO:0006810//transport;GO:0071702//organic substance transport;GO:0008643//carbohydrate transport;GO:0051179//localization;GO:0051234//establishment of localization;[C]GO:0031224//intrinsic component of membrane;GO:0110165//cellular anatomical entity;GO:0016021//integral component of membrane;GO:0016020//membrane;[F]GO:0005215//transporter activity;GO:0022857//transmembrane transporter activity;	[C]cellular anatomical entity;[P]localization;[F]transporter activity;	molecular_function;biological_process;cellular_component
isoform_127898
isoform_127946
isoform_12795	[P]GO:0006457//protein folding;GO:0042026//protein refolding;GO:0009987//cellular process;[F]GO:0043167//ion binding;GO:0036094//small molecule binding;GO:1901265//nucleoside phosphate binding;GO:0000166//nucleotide binding;GO:0097159//organic cyclic compound binding;GO:1901363//heterocyclic compound binding;GO:0005488//binding;GO:0043168//anion binding;GO:0097367//carbohydrate derivative binding…	[P]cellular process;[F]binding;	biological_process;molecular_function
isoform_128072
isoform_12815	[P]GO:0006950//response to stress;GO:0050896//response to stimulus;GO:0009744//response to sucrose;GO:0009991//response to extracellular stimulus;GO:0009746//response to hexose;GO:1905582//response to mannose;GO:0034284//response to monosaccharide;GO:1901700//response to oxygen-containing compound;GO:0034285//response to disaccharide;GO:0042221//response to chemical;GO:0031667//response to nutrie…	[C]intracellular;cellular anatomical entity;[P]response to stimulus;[F]binding;	molecular_function;cellular_component;biological_process
isoform_12890	[C]GO:0016020//membrane;GO:0031224//intrinsic component of membrane;GO:0110165//cellular anatomical entity;GO:0016021//integral component of membrane;	[C]cellular anatomical entity;	cellular_component
isoform_1291
isoform_12935	[F]GO:0005509//calcium ion binding;GO:0043169//cation binding;GO:0046872//metal ion binding;GO:0005488//binding;GO:0043167//ion binding;GO:0046914//transition metal ion binding;GO:0008270//zinc ion binding;	[F]binding;	molecular_function
[truncated: 7,662 more rows]

## Sheet: Supplementary Table S6
Supplementary Table S6 GO functional classification of 5275 annotated DEGs
[truncated: 39 more rows]

[truncated: 12 more sheets: Supplementary Table S7, Supplementary Table S8, Supplementary Table S9, Supplementary Table S10, Supplementary Table S11, Supplementary Table S12, Supplementary Table S13, Supplementary Table S14, Supplementary Table S15, Supplementary Table S16, Supplementary Table  S17, Supplementary Table S18]
